# Supplementary material for: Establishment of a Necroptosis Related Genes Signature to Predict Prognosis and Therapeutic Response in Colon Cancer
Source: Front Cell Dev Biol. 2022 Jul 8;10:921320. doi: 10.3389/fcell.2022.921320 (PMC9305485; doi:10.3389/fcell.2022.921320)
Supplement: Supplementary file 3 [file Table1.XLSX]

## Sheet: TCGA-COAD
submitter_id.samples	age_at_initial_pathologic_diagnosis	batch_number	bcr	bcr_followup_barcode	bcr_followup_uuid	submitter_id	braf_gene_analysis_performed	braf_gene_analysis_result	circumferential_resection_margin	colon_polyps_present	date_of_withdraw	day_of_dcc_upload	day_of_form_completion	days_to_initial_pathologic_diagnosis	file_uuid	followup_case_report_form_submission_reason	followup_treatment_success	history_of_colon_polyps	history_of_neoadjuvant_treatment	informed_consent_verified	kras_gene_analysis_performed	kras_mutation_codon	kras_mutation_found	loss_expression_of_mismatch_repair_proteins_by_ihc	lost_follow_up	lymph_node_examined_count	lymphatic_invasion	microsatellite_instability	month_of_dcc_upload	month_of_form_completion	non_nodal_tumor_deposits	number_of_abnormal_loci	number_of_first_degree_relatives_with_cancer_diagnosis	number_of_loci_tested	number_of_lymphnodes_positive_by_he	number_of_lymphnodes_positive_by_ihc	other_dx	pathologic_M	pathologic_N	pathologic_T	patient_id	perineural_invasion_present	person_neoplasm_cancer_status	postoperative_rx_tx	preoperative_pretreatment_cea_level	primary_lymph_node_presentation_assessment	primary_therapy_outcome_success	radiation_therapy	reason_for_withdraw
TCGA-F4-6460-01A	51	123.74.0	Nationwide Children's Hospital	TCGA-F4-6460-F29824	C5664BD6-77BB-4B54-95E7-0253119610DE	TCGA-F4-6460	NO		NA	NO		22	29	0	5020AB92-122D-4873-BA89-90921B861895	Scheduled Follow-up Submission		NO	No	YES	NO	NA		NO		6	NO		12	3	NO	NA	NA	NA	1	0	No	M0	N1	T3	6460	NO	WITH TUMOR	YES	NA	YES		NO
TCGA-A6-3807-01A	53	41.78.0	Nationwide Children's Hospital	TCGA-A6-3807-F2546	0ac8de49-6a23-48b4-af74-8aaf2a64ca09	TCGA-A6-3807	NO		NA	YES		22	26	0	8CD0B50A-9B2D-4D68-BA14-430AB512446C			NO	No	YES	NO	NA		NO		24	YES	NO	12	10	NO	0	0	5	5	NA	No	M0	N2	T3	3807		TUMOR FREE	YES	45	YES		NO
TCGA-AA-A01C-01A	75	33.79.0	Nationwide Children's Hospital	TCGA-AA-A01C-F37307	46508480-8E1F-419E-BAF0-708998F1FF2A	TCGA-AA-A01C	NO		NA			22	1	0	A6B980C5-C6E8-44A3-B5C2-105AA2EED356	Scheduled Follow-up Submission	Complete Remission/Response	YES	No	YES	NO	NA		NO	NO	31	YES		12	12		NA	0	NA	3	NA	No	M0	N1	T2	A01C		TUMOR FREE	NO	NA	YES		NO
TCGA-A6-A566-01A	55	300.56.0	Nationwide Children's Hospital	TCGA-A6-A566-F42248	B606B322-10CC-448D-8676-D394D2E536CD	TCGA-A6-A566			NA	NO		22	15	0	07818367-C3E1-454A-80A7-A9B9C6180CCC	Additional New Tumor Event	Progressive Disease	NO	No	YES	YES	NA	NO		NO	13	YES		12	4		NA	0	NA	2	NA	No	M0	N1	T4	A566		WITH TUMOR	YES	NA	YES	Progressive Disease	NO
TCGA-AA-3870-01A	71	41.78.0	Nationwide Children's Hospital	TCGA-AA-3870-F37988	E2FBA897-7789-4DC4-8E4C-C430A3AC06BF	TCGA-AA-3870	NO		NA			22	8	0	7A361D1C-3E32-44EF-AC40-2073DE80285A	Scheduled Follow-up Submission	Complete Remission/Response	YES	No	YES	NO	NA		NO	NO	23	YES		12	12		NA	1	NA	5	NA	Yes	M1	N2	T3	3870		TUMOR FREE	YES	NA	YES	Complete Remission/Response
TCGA-AA-3715-01A	77	36.83.0	Nationwide Children's Hospital	TCGA-AA-3715-F38103	D6B2820C-2B23-4C8D-8F95-F9F7DF323A5C	TCGA-AA-3715	NO		NA			22	10	0	E115E375-BF2B-411F-8AA2-E3E990A727BF	Scheduled Follow-up Submission		YES	No	YES	NO	NA		NO	NO	12	YES		12	12		NA	0	NA	0	NA	Yes	M0	N0	T3	3715			NO	7.05	YES		NO
TCGA-AZ-6600-01A	64	123.74.0	Nationwide Children's Hospital	TCGA-AZ-6600-F34147	98402D27-0304-4BA2-9D6A-521B4D30F699	TCGA-AZ-6600			NA			22	31	0	DC2716C7-3DC2-4D7E-B89D-76199136AAFF	Scheduled Follow-up Submission	Progressive Disease		No	YES		NA			NO	10	YES		12	7		NA	NA	NA	1	NA	No	M1	N1	T4	6600	YES	WITH TUMOR	YES	20.1	YES	Progressive Disease	NO
TCGA-AA-3968-01A	55	41.78.0	Nationwide Children's Hospital	TCGA-AA-3968-F37951	C4C7AB20-9C5D-4A4B-8B26-AC3F1ED65703	TCGA-AA-3968	NO		NA			22	6	0	DDA77EF3-17DF-48F2-8B7B-47A80A21565A	Scheduled Follow-up Submission	Complete Remission/Response	NO	No	YES	NO	NA		NO	NO	19	NO		12	12		NA	1	NA	0	NA	No	M0	N0	T2	3968		TUMOR FREE	NO	1.55	YES	Complete Remission/Response	NO
TCGA-A6-2671-01A	85	76.78.0	Nationwide Children's Hospital	TCGA-A6-2671-F6018	10ec0e4e-441f-4654-89e4-0f17c6426814	TCGA-A6-2671	NO		NA	NO		22	24	0	52D02D27-F523-4FB1-99CD-D84719859480			YES	No	YES	NO	NA				27	YES		12	1	YES	NA	0	NA	3	NA	No	M1	N2	T3	2671		WITH TUMOR	YES	17.4	YES		NO
TCGA-AY-A71X-01A	54	385.43.0	Nationwide Children's Hospital	TCGA-AY-A71X-F68764	517DE6A6-B4FC-4A0A-81F7-1AFDD582FF8C	TCGA-AY-A71X	NO		NA	YES		22	15	0	C674AF6B-F9AF-4FC5-9A15-3FD8630CEAA4	Scheduled Follow-up Submission	Complete Remission/Response	NO	No	YES	NO	NA		YES	NO	28	NO	NO	12	12	NO	NA	0	NA	0	NA	No	M0	N0	T2	A71X	NO	TUMOR FREE	NO	4.8	YES	Complete Remission/Response	NO
TCGA-AA-3532-01A	63	28.86.0	Nationwide Children's Hospital	TCGA-AA-3532-F37317	77DB2106-5A6E-462F-AD80-6BDFC1E4209B	TCGA-AA-3532	NO		NA			22	1	0	32D47447-2574-4C92-B78B-FB2C209F4155	Scheduled Follow-up Submission		NO	No	YES	NO	NA		NO	NO	35	NO		12	12		NA	0	NA	0	NA	No	M0	N0	T3	3532			NO	1.28	YES		NO
TCGA-A6-5662-01A	46	89.77.0	Nationwide Children's Hospital	TCGA-A6-5662-F18198	56638b81-e2a6-41ea-84ca-942a64fe13d4	TCGA-A6-5662	NO		NA	NO		22	8	0	7AF3462B-2726-40BE-9A42-D3A7707D89E6			NO	No	YES	YES	12	YES	YES		13	YES	NO	12	11	YES	0	0	5	7	NA	No	M1	N2	T3	5662		WITH TUMOR	YES	NA	YES		NO
TCGA-AA-3696-01A	75	36.83.0	Nationwide Children's Hospital	TCGA-AA-3696-F38096	5E737FE8-F80B-493A-966A-8F8951042C35	TCGA-AA-3696	NO		NA	YES		22	10	0	036DF02A-48C0-48BE-ADE3-F3296575420E	Scheduled Follow-up Submission		YES	No	YES	NO	NA		NO	NO	26	NO		12	12		NA	0	NA	1	NA	No	M1	N1	T3	3696			NO	NA	YES		NO
TCGA-CA-5254-01A	42	138.78.0	Nationwide Children's Hospital	TCGA-CA-5254-F20286	6de790b5-e912-4c6c-bb3f-419e7299c0b1	TCGA-CA-5254			NA			22	9	0	29EBC64A-E925-455A-86B7-3597041BB57D				No	YES		NA				NA			12	1		NA	NA	NA	NA	NA	No	M0	N0	T3	5254		TUMOR FREE	YES	NA	NO		NO
TCGA-AA-3858-01A	67	36.83.0	Nationwide Children's Hospital	TCGA-AA-3858-F37998	3477AA26-DE8E-4C5E-AC8A-B1B6F381AF35	TCGA-AA-3858	NO		NA			22	8	0	491FB496-478C-4815-8BA0-09BD64A798D0	Scheduled Follow-up Submission	Complete Remission/Response	YES	No	YES	NO	NA		NO	NO	12	YES		12	12		NA	1	NA	0	NA	No	M0	N0	T2	3858		TUMOR FREE	NO	NA	YES	Complete Remission/Response	NO
TCGA-A6-6782-01A	82	138.78.0	Nationwide Children's Hospital	TCGA-A6-6782-F29583	ef0e3db6-7ea5-4685-b159-fa133ae9db75	TCGA-A6-6782	NO		NA	NO		22	23	0	9036C106-FBB6-463F-9470-44555279F991			NO	No	YES	NO	NA		NO		25	NO		12	3	YES	NA	NA	NA	0	NA	No	MX	N0	T4a	6782	YES	TUMOR FREE	NO	2.7	YES		NO
TCGA-D5-6537-01A	64	116.77.0	Nationwide Children's Hospital	TCGA-D5-6537-F28923	867db67e-686b-4bfa-97d6-ba7216a534f9	TCGA-D5-6537	NO		18	YES		22	2	0	A8CCA3BE-3015-4354-BE5D-7E8C0A9008AE	Scheduled Follow-up Submission			No	YES	NO	NA				11	YES		12	3	NO	NA	0	NA	1	NA	No	MX	N1a	T3	6537	YES	WITH TUMOR	NO	2.7	YES		NO
TCGA-A6-2685-01A	48	76.78.0	Nationwide Children's Hospital	TCGA-A6-2685-F7024	061b693d-55d3-4f32-8a1e-0c6c107ce80c	TCGA-A6-2685	NO		NA	NO		22	2	0	B28D980C-9C67-4C97-A5F4-141D9487D12B				No	YES	NO	NA				29	NO		12	2	NO	NA	0	NA	0	NA	No	M0	N0	T3	2685		TUMOR FREE	NO	29.5	YES		NO
TCGA-AA-3680-01A	67	36.83.0	Nationwide Children's Hospital	TCGA-AA-3680-F38089	75D11811-3CEE-42FF-82EB-47E11F01886C	TCGA-AA-3680	NO		NA			22	10	0	F77ABC2E-E349-4045-BE70-19F999D30FCA	Scheduled Follow-up Submission	Progressive Disease	NO	No	YES	NO	NA		NO	NO	35	YES		12	12		NA	0	NA	12	NA	No	M1	N2	T4	3680		WITH TUMOR	YES	59.94	YES	Progressive Disease	NO
TCGA-AZ-6605-01A	77	138.78.0	Nationwide Children's Hospital	TCGA-AZ-6605-F34154	58A9C23A-7394-458B-A7EB-75006F85004B	TCGA-AZ-6605			NA			22	31	0	12AB7C76-BD33-4CA6-8F8D-EA318F18D4C5	Scheduled Follow-up Submission	Stable Disease		No	YES		NA			NO	22	YES		12	7		NA	NA	NA	1	NA	No	M0	N1	T4	6605	NO	TUMOR FREE	YES	2.5	YES	Stable Disease	NO
TCGA-AA-A02O-01A	82	66.81.0	Nationwide Children's Hospital			TCGA-AA-A02O	NO		NA			22	NA	0	904AA4BA-AE92-47CA-8EA5-49B8DBB868B2			NO	No	YES	NO	NA		NO		18	YES		12	NA		NA	0	NA	0	NA	No	M0	N0	T3	A02O				5.97	YES
TCGA-CA-6716-01A	65	138.78.0	Nationwide Children's Hospital	TCGA-CA-6716-F70864	6DAF087E-7B22-46B4-B37D-3C0781CD0E07	TCGA-CA-6716			NA			22	10	0	177451DC-A327-430C-B34B-108F33B88588	Scheduled Follow-up Submission	Complete Remission/Response		No	YES		NA			NO	NA			12	3		NA	NA	NA	NA	NA	No	M0	N0	T3	6716		TUMOR FREE	YES	NA	NO	Complete Remission/Response	NO
TCGA-AA-3534-01A	78	28.86.0	Nationwide Children's Hospital	TCGA-AA-3534-F37319	5B6EA674-C1CC-40B6-98B2-2BA694B2AD0D	TCGA-AA-3534	NO		NA			22	1	0	6F594437-AE92-41FB-B812-4A236FE2B155	Scheduled Follow-up Submission	Complete Remission/Response	YES	No	YES	NO	NA		NO	NO	36	YES		12	12		NA	1	NA	0	NA	No	M0	N0	T3	3534		TUMOR FREE	NO	1.56	YES	Complete Remission/Response	NO
TCGA-AA-A00F-01A	66	30.80.0	Nationwide Children's Hospital	TCGA-AA-A00F-F37931	118C2D51-6961-4975-8E8E-2895C8A36910	TCGA-AA-A00F	NO		NA			22	6	0	E4ABCDD9-A7AC-4010-A5BE-72A0D16AA4CD	Scheduled Follow-up Submission	Partial Remission/Response	NO	No	YES	NO	NA		NO	NO	25	YES		12	12		NA	0	NA	7	NA	No	M0	N2	T3	A00F		TUMOR FREE	YES	2.93	YES	Partial Remission/Response	NO
TCGA-AA-3860-01A	53	36.83.0	Nationwide Children's Hospital	TCGA-AA-3860-F37997	2EF46C9E-FC1B-440F-A15A-EE37772766A5	TCGA-AA-3860	NO		NA			22	8	0	55001145-3234-4F93-B821-67DAF3DB82FF	Scheduled Follow-up Submission	Complete Remission/Response	YES	No	YES	NO	NA		NO	NO	14	YES		12	12		NA	0	NA	2	NA	Yes	M0	N1	T3	3860		TUMOR FREE	YES	NA	YES	Complete Remission/Response	NO
TCGA-NH-A50U-01A	42	385.43.0	Nationwide Children's Hospital			TCGA-NH-A50U	NO		5	YES		22	NA	0	6F7011DB-A33E-4A90-9B44-36A0FDFB2AEE				No	YES	YES	12	YES			17	NO		12	NA	NO	NA	0	NA	0	NA	No	M1a	N0	T4a	A50U	YES			NA	YES
TCGA-F4-6809-01A	52	138.78.0	Nationwide Children's Hospital	TCGA-F4-6809-F31711	F13A8E30-9361-4847-BC94-78EBB5A83C83	TCGA-F4-6809	NO		NA	NO		22	8	0	1641A079-3539-4D76-8E85-1ECD03EAE8D5	Scheduled Follow-up Submission			No	YES	NO	NA		NO		12	NO		12	5	NO	NA	0	NA	3	NA	No	M1	N1	T3	6809	NO	WITH TUMOR	NO	NA	YES		NO
TCGA-AA-3516-01A	74	29.82.0	Nationwide Children's Hospital	TCGA-AA-3516-F37287	DF185582-7617-426F-8ABA-564EF8A496AD	TCGA-AA-3516	NO		NA			22	1	0	8A2285D9-4163-40CE-BFE2-96C22F21B8FF	Scheduled Follow-up Submission		YES	Yes	YES	NO	NA		NO	NO	26	NO		12	12		NA	0	NA	7	NA	Yes	M0	N2	T3	3516			NO	1.41	YES		NO
TCGA-AA-3975-01A	80	41.78.0	Nationwide Children's Hospital	TCGA-AA-3975-F37945	FA8E3DF4-1413-4B2E-8C89-09093D15E907	TCGA-AA-3975	NO		NA			22	6	0	F6A2CADF-E5DB-4CF8-97ED-77757591BC8E	Scheduled Follow-up Submission	Complete Remission/Response	NO	No	YES	NO	NA		NO	NO	14	NO		12	12		NA	0	NA	0	NA	No	M0	N0	T2	3975		TUMOR FREE	NO	NA	YES	Complete Remission/Response	NO
TCGA-G4-6315-01A	66	116.77.0	Nationwide Children's Hospital	TCGA-G4-6315-F21984	0f586976-8f4b-451e-b96c-5f998705d12f	TCGA-G4-6315	NO		1	YES		22	27	0	B8226FD2-5305-4704-9678-F211099FB6B1	Scheduled Follow-up Submission		NO	No	YES	YES	NA	NO	NO		82	NO		12	1	NO	NA	NA	NA	1	NA	No	M1	N1	T3	6315	YES	TUMOR FREE	YES	43.4	YES		NO
TCGA-CK-4951-01A	79	76.78.0	Nationwide Children's Hospital	TCGA-CK-4951-F9636	a69b950d-1420-422a-8c0a-3ab468e37ffd	TCGA-CK-4951	NO		72	NO		22	29	0	D024FAFB-5E94-4205-A393-FD184E89EDBB			YES	No	YES	NO	NA				30	NO		12	3	NO	NA	NA	NA	0	0	No	M0	N0	T3	4951	NO	TUMOR FREE	NO	6.2	YES		NO
TCGA-AA-3548-01A	71	28.86.0	Nationwide Children's Hospital	TCGA-AA-3548-F37506	63124CE1-05B3-4E7A-B8C1-A08BC2750EBE	TCGA-AA-3548	NO		NA			22	3	0	C8EBC728-9447-4D71-8CDD-8DBDCFAF8F3B	Scheduled Follow-up Submission	Complete Remission/Response	NO	No	YES	NO	NA		NO	NO	23	YES		12	12		NA	0	NA	4	NA	No	M0	N2	T3	3548		TUMOR FREE	YES	55.01	YES	Complete Remission/Response	NO
TCGA-AA-A00R-01A	64	30.80.0	Nationwide Children's Hospital			TCGA-AA-A00R	NO		NA			22	NA	0	237A9FCB-C007-4CB2-B41F-96F1140B626A			YES	No	YES	NO	NA		NO		27	NO		12	NA		NA	3	NA	0	NA	No	M0	N0	T2	A00R				0.34	YES
TCGA-G4-6317-01A	51	116.77.0	Nationwide Children's Hospital	TCGA-G4-6317-F21905	10c5ef89-d062-465e-a0ed-a8eea2794475	TCGA-G4-6317	NO		NA	NO		22	30	0	5543CDB3-0716-4360-91CE-E2A2F72311FF	Scheduled Follow-up Submission		NO	No	YES	YES	NA	NO	YES		109		NO	12	1	NO	NA	0	NA	6	NA	No	MX	N2	T3	6317	NO	TUMOR FREE	YES	NA	YES		NO
TCGA-G4-6317-02A	51	116.77.0	Nationwide Children's Hospital	TCGA-G4-6317-F21905	10c5ef89-d062-465e-a0ed-a8eea2794475	TCGA-G4-6317	NO		NA	NO		22	30	0	5543CDB3-0716-4360-91CE-E2A2F72311FF	Scheduled Follow-up Submission		NO	No	YES	YES	NA	NO	YES		109		NO	12	1	NO	NA	0	NA	6	NA	No	MX	N2	T3	6317	NO	TUMOR FREE	YES	NA	YES		NO
TCGA-F4-6704-01A	60	138.78.0	Nationwide Children's Hospital			TCGA-F4-6704	NO		NA	NO		22	NA	0	FC00DB9E-BC7C-4BBE-856F-1854A7EC5B95			NO	No	YES	NO	NA		YES		18	NO	NO	12	NA		NA	0	NA	13	NA	No	MX	N2b	T3	6704				14.9	YES
TCGA-DM-A1D8-01A	50	132.71.0	Nationwide Children's Hospital	TCGA-DM-A1D8-F19077	61D68E12-E4FB-46B0-99BA-D6A6FB4929D8	TCGA-DM-A1D8	YES	Normal	NA			22	2	0	919CBD80-C377-4055-B4FD-4DE87D3F910D	Scheduled Follow-up Submission		NO	No	YES	YES	13	YES			15		NO	12	12		0	0	5	1	NA	No		N1	T3	A1D8				NA	YES
TCGA-D5-5537-01A	83	157.71.0	Nationwide Children's Hospital	TCGA-D5-5537-F58487	D66E0780-F997-47CD-A0C5-2191584254B3	TCGA-D5-5537	NO		NA	YES		22	11	0	F61519E3-A7F3-4CED-8A4E-6D10596518C3	Scheduled Follow-up Submission	Progressive Disease	NO	No	YES	NO	NA		NO	NO	10	NO		12	4		NA	0	NA	7	NA	No	MX	N2	T3	5537	NO	WITH TUMOR	NO	NA	YES	Complete Remission/Response	NO
TCGA-AU-6004-01A	69	116.77.0	Nationwide Children's Hospital	TCGA-AU-6004-F13413	8FDE2AB2-7281-4311-8727-4120B80DA989	TCGA-AU-6004	NO		90	NO		22	14	0	81FDC986-8350-43DA-B1E1-310FB06B5870			YES	No	YES	NO	NA				16	NO		12	5	NO	NA	NA	NA	0	0	No	M0	N0	T2	6004	NO			NA	YES
TCGA-A6-2681-01A	73	76.78.0	Nationwide Children's Hospital	TCGA-A6-2681-F6157	e9c0d412-f246-40d7-bfd6-16d2b194f9cc	TCGA-A6-2681	NO		NA	NO		22	14	0	8858BFFC-983D-4DC2-A3CE-018E560227E6			NO	No	YES	NO	NA				23	NO		12	1	NO	NA	0	NA	0	0	Yes	M0	N0	T3	2681		TUMOR FREE	NO	2.4	YES		NO
TCGA-AA-3558-01A	70	28.86.0	Nationwide Children's Hospital	TCGA-AA-3558-F37513	82D8FEFE-9026-45EC-90A6-711F94B11C65	TCGA-AA-3558	NO		NA			22	3	0	7F23F31D-DB9D-4370-92A0-987371C378F4	Scheduled Follow-up Submission	Complete Remission/Response	NO	No	YES	NO	NA		NO	NO	46	NO		12	12		NA	0	NA	0	NA	No	M0	N0	T2	3558		TUMOR FREE	NO	NA	YES	Complete Remission/Response	NO
TCGA-AA-A01R-01A	47	66.81.0	Nationwide Children's Hospital	TCGA-AA-A01R-F37294	00D1DBC1-D0DF-4D5C-BED3-84288E4F04D4	TCGA-AA-A01R	NO		NA			22	1	0	C38C297C-E035-4213-BAD3-302F21DFACE6	Scheduled Follow-up Submission	Partial Remission/Response	NO	No	YES	NO	NA		NO	YES	19	YES		12	12		NA	1	NA	9	NA	No	M0	N2	T3	A01R		WITH TUMOR	YES	1.83	YES	Partial Remission/Response	YES
TCGA-G4-6314-01A	76	116.77.0	Nationwide Children's Hospital	TCGA-G4-6314-F21805	f42fd0c2-7add-45cf-8a01-cab1e3fb9742	TCGA-G4-6314	YES	Normal	NA	YES		22	27	0	5CE8EBDD-CEDA-4C7B-AC15-86F8864375D8	Scheduled Follow-up Submission		NO	No	YES	YES	NA	NO	NO		59	YES		12	1	YES	NA	0	NA	50	NA	Yes	M1	N2	T3	6314	NO	WITH TUMOR	YES	NA	YES		NO
TCGA-AA-3664-01A	74	36.83.0	Nationwide Children's Hospital	TCGA-AA-3664-F37521	0C8F1A4A-503F-48E3-9D50-AF76307D0D44	TCGA-AA-3664	NO		NA			22	3	0	043508C1-C59B-4379-9399-142354C2ADEB	Scheduled Follow-up Submission		NO	No	YES	NO	NA		NO	NO	22	NO		12	12		NA	0	NA	0	NA	No	M0	N0	T3	3664			NO	4.22	YES		NO
TCGA-AA-3989-01A	84	41.78.0	Nationwide Children's Hospital	TCGA-AA-3989-F37936	9DC9B43A-5510-4D0C-B38E-36B93205F5C1	TCGA-AA-3989	NO		NA			22	6	0	33CE5A8D-F7F9-44EB-8925-57F0D309DB17	Scheduled Follow-up Submission		YES	No	YES	NO	NA		NO	NO	19	YES		12	12		NA	0	NA	5	NA	No	M1	N2	T3	3989			NO	NA	YES		NO
TCGA-AA-3812-01A	82	36.83.0	Nationwide Children's Hospital	TCGA-AA-3812-F38106	44BB46EE-5F4C-4567-A7FB-F04050C4FFC7	TCGA-AA-3812	NO		NA			22	10	0	3F46DC27-2E93-4C3F-AE45-19E13400B2CC	Scheduled Follow-up Submission	Complete Remission/Response	NO	No	YES	NO	NA		NO	NO	13	YES		12	12		NA	0	NA	0	NA	No	M0	N0	T3	3812		TUMOR FREE	NO	1.52	YES	Complete Remission/Response	NO
TCGA-CK-5914-01A	81	89.77.0	Nationwide Children's Hospital	TCGA-CK-5914-F39696	626CA4B2-7AFA-488C-BF0D-0EF08F525251	TCGA-CK-5914	NO		25	NO		22	30	0	4770CDD6-6AC6-4687-9496-DA9762435710	Scheduled Follow-up Submission		NO	No	YES	NO	NA			YES	NA	NO		12	1	NO	NA	NA	NA	NA	NA	No	MX	N1	T3	5914	NO			NA
TCGA-AA-A00Z-01A	70	30.80.0	Nationwide Children's Hospital	TCGA-AA-A00Z-F37311	2CD8A5D2-EF19-4961-B1BD-CA6728FD960C	TCGA-AA-A00Z	NO		NA			22	1	0	8F2F5DC2-8BA7-4899-BB74-3DB7B8CC7AB5	Scheduled Follow-up Submission	Complete Remission/Response	YES	No	YES	NO	NA		NO	NO	37	YES		12	12		NA	0	NA	0	NA	Yes	M0	N0	T3	A00Z		TUMOR FREE	NO	1.18	YES	Complete Remission/Response	NO
TCGA-NH-A8F7-01A	53	422.38.0	Nationwide Children's Hospital	TCGA-NH-A8F7-F67150	54FAA61A-7D39-43D3-B225-321889A5200E	TCGA-NH-A8F7	NO		NA	NO		22	31	0	4C914635-7CB8-43DF-A1E0-12861169506E	Scheduled Follow-up Submission		NO	No	YES	YES	NA	NO	YES	NO	18	NO	NO	12	10	NO	NA	0	NA	0	0	Yes, History of Synchronous/Bilateral Malignancy	MX	N0	T3	A8F7	NO	WITH TUMOR	YES	100.3	YES	Partial Remission/Response	YES
TCGA-NH-A8F7-06A	53	422.38.0	Nationwide Children's Hospital	TCGA-NH-A8F7-F67150	54FAA61A-7D39-43D3-B225-321889A5200E	TCGA-NH-A8F7	NO		NA	NO		22	31	0	4C914635-7CB8-43DF-A1E0-12861169506E	Scheduled Follow-up Submission		NO	No	YES	YES	NA	NO	YES	NO	18	NO	NO	12	10	NO	NA	0	NA	0	0	Yes, History of Synchronous/Bilateral Malignancy	MX	N0	T3	A8F7	NO	WITH TUMOR	YES	100.3	YES	Partial Remission/Response	YES
TCGA-CM-6164-01A	46	89.77.0	Nationwide Children's Hospital	TCGA-CM-6164-F13931	32e44f95-df79-479b-8377-39d4a3aaabe8	TCGA-CM-6164	NO		NA	NO		22	19	0	702DE5B4-A324-451E-825C-E8778DFD0F3F	Scheduled Follow-up Submission		NO	No	YES	NO	NA		YES		14	NO		12	7	NO	NA	1	NA	0	NA	No	M0	N0	T3	6164	YES	TUMOR FREE	NO	9.6	YES		NO
TCGA-AD-6901-01A	78	157.71.0	Nationwide Children's Hospital	TCGA-AD-6901-F47111	B92E9923-B382-4122-ADDC-0DA7859F0A80	TCGA-AD-6901	NO		1	NO		22	22	0	6E0CF11E-2B68-4D4F-AA8A-17897710E469	Scheduled Follow-up Submission	Progressive Disease		No	YES	NO	NA		NO	NO	19	NO		12	8	NO	NA	NA	NA	0	NA	No	MX	N0	T3	6901		WITH TUMOR	YES	5.9	YES	Complete Remission/Response	NO
TCGA-AA-A01Q-01A	48	30.80.0	Nationwide Children's Hospital			TCGA-AA-A01Q	NO		NA			22	NA	0	BC7E21BE-869B-4373-91E6-267F2C95DD16			NO	No	YES	NO	NA		NO		16	YES		12	NA		NA	1	NA	0	NA	No	M0	N0	T3	A01Q				1.88	YES
TCGA-AA-3862-01A	82	41.78.0	Nationwide Children's Hospital	TCGA-AA-3862-F37995	D6F7944F-1E66-4166-B9E6-1B9EFDD9DB90	TCGA-AA-3862	NO		NA			22	8	0	DEAA1C69-A42E-4D2A-B8BA-951BD1876BFF	Scheduled Follow-up Submission	Complete Remission/Response	NO	No	YES	NO	NA		NO	NO	16	YES		12	12		NA	0	NA	0	NA	Yes	M0	N0	T3	3862		TUMOR FREE	NO	NA	YES	Complete Remission/Response	NO
TCGA-CM-6162-01A	48	89.77.0	Nationwide Children's Hospital	TCGA-CM-6162-F13927	b510abb2-c59c-4638-b0eb-4bb40c02d62b	TCGA-CM-6162	NO		NA	YES		22	19	0	B322918B-F5A7-4AA6-BC5F-8EAD88143583	Scheduled Follow-up Submission		NO	No	YES	NO	NA		YES		46	YES		12	7	NO	NA	1	NA	1	NA	No	M0	N1a	T3	6162	YES	TUMOR FREE	YES	1.1	YES		NO
TCGA-DM-A28K-01A	75	154.69.0	Nationwide Children's Hospital	TCGA-DM-A28K-F19070	6DC528BD-12EA-4A66-907A-29EB3EACD41B	TCGA-DM-A28K	NO		NA			22	5	0	3D4159BC-FBAD-408C-B2E9-2F95529C4DA9	Scheduled Follow-up Submission		NO	No	YES	NO	NA				17	NO	NO	12	12		0	0	10	0	NA	No	M0	N0	T3	A28K				NA	YES
TCGA-AA-3521-01A	87	28.86.0	Nationwide Children's Hospital			TCGA-AA-3521	NO		NA			22	NA	0	CCB18272-7E68-4F20-AF02-EEC586844C20			YES	No	YES	NO	NA		NO		22	NO		12	NA		NA	0	NA	0	NA	Yes	M0	N0	T3	3521				0.99	YES
TCGA-AZ-5407-01A	51	116.77.0	Nationwide Children's Hospital	TCGA-AZ-5407-F32208	3c864783-4302-4f29-85eb-edb63028df3d	TCGA-AZ-5407			NA			22	18	0	36D27C18-5E53-4F10-BDFC-0B000AABD436	Scheduled Follow-up Submission			No	YES		NA		YES		16	NO	NO	12	5	NO	NA	0	NA	0	NA	No	M0	N0	T1	5407		TUMOR FREE	NO	NA	YES		NO
TCGA-AA-3525-01A	90	29.82.0	Nationwide Children's Hospital	TCGA-AA-3525-F37306	95AC1AA9-E012-4D2A-91DC-9DDB8A973FFA	TCGA-AA-3525	NO		NA			22	1	0	5185D74B-7229-4EDC-B781-5665FED5C6DE	Scheduled Follow-up Submission	Partial Remission/Response	NO	No	YES	NO	NA		NO	NO	28	NO		12	12		NA	0	NA	2	NA	Yes	M0	N1	T3	3525		TUMOR FREE	NO	11.14	YES	Partial Remission/Response	NO
TCGA-QG-A5YW-01A	55	300.56.0	Nationwide Children's Hospital	TCGA-QG-A5YW-F58609	7B1A87B7-6636-4298-8E71-2668C157A716	TCGA-QG-A5YW	NO		165	NO		22	16	0	9F2818BC-A6A4-4C5C-B47C-4C1A19D3CC97	Scheduled Follow-up Submission		NO	No	YES	NO	NA		YES	NO	15	NO		12	4	YES	NA	0	NA	11	NA	No	MX	N2b	T3	A5YW	NO	TUMOR FREE	YES	11.37	YES	Complete Remission/Response	NO
TCGA-AY-A69D-01A	55	385.43.0	Nationwide Children's Hospital	TCGA-AY-A69D-F59400	442544BB-0F7A-43E1-8E08-80D969458C49	TCGA-AY-A69D	NO		NA	NO		22	12	0	6D32BE60-9AB1-457E-B8DD-7CF36049B622	Scheduled Follow-up Submission	Complete Remission/Response	NO	No	YES	NO	NA		YES	NO	25	NO	NO	12	5	NO	NA	0	NA	0	NA	No	M0	N0	T3	A69D	NO	TUMOR FREE	NO	1	YES	Complete Remission/Response	NO
TCGA-CM-5862-01A	80	89.77.0	Nationwide Children's Hospital	TCGA-CM-5862-F13893	0a2f9eca-03b6-43fc-9ca1-2dc3a74df57e	TCGA-CM-5862	YES	Normal	NA	YES		22	18	0	59365C9B-7333-4CAD-97EB-B360D08F06D3	Scheduled Follow-up Submission		NO	No	YES	YES	NA	NO	NO		24	NO		12	7	YES	NA	0	NA	1	NA	No	M1a	N1a	T3	5862	NO	WITH TUMOR	NO	10	YES		NO
TCGA-CM-5341-01A	82	76.78.0	Nationwide Children's Hospital	TCGA-CM-5341-F5924	0058a4df-fac6-459e-80cf-70ea5009daea	TCGA-CM-5341	NO		NA	NO		22	10	0	6DCA75C4-01A9-49B7-8332-E2750FDCF432			YES	No	YES	NO	NA		NO		18	YES		12	1	NO	NA	0	NA	1	NA	No	M0	N1a	T2	5341	NO	TUMOR FREE	YES	16.7	YES		NO
TCGA-A6-6781-01A	43	157.71.0	Nationwide Children's Hospital	TCGA-A6-6781-F29216	e8050064-6641-462c-af41-0d85d0c12b58	TCGA-A6-6781	NO		NA	YES		22	12	0	6B33CDB5-6BC0-44D0-82E8-321B47333A2F				No	YES	NO	NA		NO		30	YES		12	3	NO	NA	NA	NA	2	NA	No	MX	N1b	T4b	6781		TUMOR FREE	YES	6.5	YES		NO
TCGA-A6-6781-01B	43	157.71.0	Nationwide Children's Hospital	TCGA-A6-6781-F29216	e8050064-6641-462c-af41-0d85d0c12b58	TCGA-A6-6781	NO		NA	YES		22	12	0	6B33CDB5-6BC0-44D0-82E8-321B47333A2F				No	YES	NO	NA		NO		30	YES		12	3	NO	NA	NA	NA	2	NA	No	MX	N1b	T4b	6781		TUMOR FREE	YES	6.5	YES		NO
TCGA-CM-5344-01A	39	116.77.0	Nationwide Children's Hospital	TCGA-CM-5344-F11071	20db41d8-690b-4408-b7a6-2841532b3874	TCGA-CM-5344	NO		NA	YES		22	3	0	CDB6D780-AC45-4A58-B43C-369C2623ED79			YES	No	YES	NO	NA		YES		108	YES	NO	12	5	NO	0	0	5	3	NA	No	M0	N1b	T3	5344	YES	TUMOR FREE	YES	1.9	YES		NO
TCGA-A6-6653-01A	82	123.74.0	Nationwide Children's Hospital	TCGA-A6-6653-F21300	0fc8c732-c324-4f90-99ab-3dee80a99ba4	TCGA-A6-6653	YES	Abnormal	NA	NO		22	7	0	78AE997B-2BF5-41D0-8D05-9FA9E704896E			YES	No	YES	NO	NA		YES		12	NO	YES	12	2	NO	5	0	5	0	NA	No	M0	N0	T2	6653		TUMOR FREE	NO	2.5	YES		NO
TCGA-AA-A02F-01A	68	33.79.0	Nationwide Children's Hospital	TCGA-AA-A02F-F37284	B2DD90E7-DAE0-4B5B-B680-86B485017428	TCGA-AA-A02F	NO		NA			22	1	0	8FDEBC4A-E7E3-4595-9F16-0335898D19D7	Scheduled Follow-up Submission	Partial Remission/Response	NO	No	YES	NO	NA		NO	NO	12	YES		12	12		NA	0	NA	1	NA	No	M1	N1	T3	A02F		WITH TUMOR	YES	2.49	YES	Partial Remission/Response	NO
TCGA-AA-3856-01A	59	36.83.0	Nationwide Children's Hospital			TCGA-AA-3856	NO		NA			22	NA	0	61DA20D1-5376-4D53-8F8E-BE2EFFA48DAD			YES	No	YES	NO	NA		NO		13	YES		12	NA		NA	0	NA	0	NA	No	M0	N0	T3	3856				NA	YES
TCGA-AA-A01X-01A	80	66.81.0	Nationwide Children's Hospital	TCGA-AA-A01X-F37291	DA968E56-35F5-4A1E-AE22-FCE41C38D5AC	TCGA-AA-A01X	NO		NA			22	1	0	492E0D2E-74BF-4A32-9F73-9E6617167FF5	Scheduled Follow-up Submission		YES	No	YES	NO	NA		NO	NO	14	YES		12	12		NA	0	NA	2	NA	No	M0	N1	T2	A01X		WITH TUMOR	NO	11.08	YES		NO
TCGA-AA-3818-01A	78	36.83.0	Nationwide Children's Hospital			TCGA-AA-3818	NO		NA			22	NA	0	3EC2A161-D919-4BA1-929A-66F9C00AF4EC			NO	No	YES	NO	NA		NO		18	NO		12	NA		NA	0	NA	0	NA	No	M0	N0	T3	3818				3.79	YES
TCGA-DM-A1DA-01A	71	132.71.0	Nationwide Children's Hospital	TCGA-DM-A1DA-F19080	C60647C0-0763-4233-8BCE-A2507FFEC411	TCGA-DM-A1DA	YES	Normal	NA			22	2	0	0A3227C8-0F9F-4184-A215-1EE82BBBA3FF	Scheduled Follow-up Submission			No	YES	YES	NA	NO			13		NO	12	12		1	0	5	5	NA	No	M0	N2	T3	A1DA				NA	YES
TCGA-RU-A8FL-01A	51	385.43.0	Nationwide Children's Hospital	TCGA-RU-A8FL-F56044	812A0A9A-C44E-42EF-B200-38EED15CB539	TCGA-RU-A8FL	NO		65	NO		22	13	0	709615F4-712A-4C91-8174-0F29353C4C0D		Progressive Disease	NO	No	YES	YES	NA	NO	NO	NO	21		NO	12	11	NO	NA	0	NA	5	NA	No	MX	N2a	T3	A8FL		WITH TUMOR	YES	24.6	YES	Partial Remission/Response	NO
TCGA-A6-2682-01A	70	76.78.0	Nationwide Children's Hospital	TCGA-A6-2682-F6913	9a6eede3-4bca-4aab-afad-6f2fe8c79211	TCGA-A6-2682	NO		NA	NO		22	2	0	0CD7B9D0-471A-444B-8F48-D36E3449A7DF			YES	No	YES	YES	12	YES			13	YES		12	2	YES	NA	0	NA	2	NA	Yes	M1	N1	T4b	2682		WITH TUMOR	YES	2.8	YES		NO
TCGA-G4-6303-01A	54	123.74.0	Nationwide Children's Hospital	TCGA-G4-6303-F21450	b4f1d500-2d0c-4ab4-8ec2-d35eb74d483f	TCGA-G4-6303	NO		NA	YES		22	20	0	2D9C6AA7-A6A1-4F21-88BF-FE3A69B5D472	Scheduled Follow-up Submission		NO	No	YES	YES	NA	NO	NO		25	YES		12	1	YES	NA	0	NA	1	NA	No	M1	N1	T3	6303	NO	WITH TUMOR	NO	3.8	YES		NO
TCGA-A6-6654-01A	65	138.78.0	Nationwide Children's Hospital	TCGA-A6-6654-F29546	31b87b18-a612-40b9-b2ff-9bd5c7060d6b	TCGA-A6-6654	NO		NA			22	22	0	BDF314DB-08B5-4024-9E6D-045537F638AA			YES	No	YES	NO	NA		YES		65	YES	NO	12	3	YES	0	0	5	1	NA	No	M0	N1	T3	6654		TUMOR FREE	YES	2.7	YES		NO
TCGA-A6-5667-01A	40	116.77.0	Nationwide Children's Hospital	TCGA-A6-5667-F13411	653617e8-af70-4eca-9a56-5c65f4886720	TCGA-A6-5667	NO		NA	NO		22	27	0	EF60F5CC-FE3F-417F-9E94-377F864C9F13				No	YES	NO	NA		YES		48	YES	NO	12	6	NO	0	0	4	1	NA	No	MX	N1a	T3	5667		TUMOR FREE	YES	36.3	YES		NO
TCGA-CM-4746-01A	61	76.78.0	Nationwide Children's Hospital	TCGA-CM-4746-F5911	11f25ab3-669e-4212-87a2-45abecc6544a	TCGA-CM-4746	NO		NA	YES		22	10	0	A08E2005-5988-4EEE-A1D9-1906C16F2F98			YES	No	YES	NO	NA		NO		17	NO		12	1	NO	NA	0	NA	0	NA	No	M0	N0	T2	4746	NO	TUMOR FREE	NO	2.2	YES		NO
TCGA-AD-A5EK-01A	51	300.56.0	Nationwide Children's Hospital	TCGA-AD-A5EK-F66010	807FD883-0A18-4540-A30F-14BC7E8A1839	TCGA-AD-A5EK	NO		15	YES		22	1	0	60E1C5F6-CC71-4BE5-8424-4A1644F23283	Scheduled Follow-up Submission	Complete Remission/Response	YES	No	YES	NO	NA		YES	NO	11		NO	12	10	NO	NA	0	NA	0	NA	No	MX	N0	T2	A5EK	NO	TUMOR FREE	NO	1.2	YES	Complete Remission/Response	NO
TCGA-G4-6627-01A	84	123.74.0	Nationwide Children's Hospital	TCGA-G4-6627-F21881	1ad40290-930c-4541-b61a-b5d2b8c00efe	TCGA-G4-6627	NO		6	YES		22	2	0	F749D1EA-2A8E-4E64-ADF3-B6A476E19983	Scheduled Follow-up Submission		NO	No	YES	NO	NA		NO		16	NO		12	2	NO	NA	1	NA	0	NA	No	M0	N0	T3	6627	NO	TUMOR FREE	NO	1.8	YES		NO
TCGA-AA-3955-01A	38	41.78.0	Nationwide Children's Hospital	TCGA-AA-3955-F37979	9B65EC20-49D8-46CA-A6D0-5A0B54E49744	TCGA-AA-3955	NO		NA			22	8	0	56B6AE47-0E99-48C4-B304-010350D42761	Scheduled Follow-up Submission	Complete Remission/Response	YES	No	YES	NO	NA		NO	NO	31	YES		12	12		NA	0	NA	5	NA	No	M0	N2a	T2	3955		TUMOR FREE	YES	NA	YES	Complete Remission/Response	NO
TCGA-AA-3538-01A	54	28.86.0	Nationwide Children's Hospital	TCGA-AA-3538-F37321	2C6C369F-484B-4390-ACD6-1315EB98EC40	TCGA-AA-3538	NO		NA			22	1	0	464C534C-A649-410F-A141-07879CCC3785	Scheduled Follow-up Submission	Complete Remission/Response	NO	No	YES	NO	NA		NO	NO	26	NO		12	12		NA	0	NA	0	NA	No	M0	N0	T2	3538		TUMOR FREE	NO	5.84	YES	Complete Remission/Response	NO
TCGA-CK-5912-01A	81	89.77.0	Nationwide Children's Hospital	TCGA-CK-5912-F39300	6B9AC565-5657-47A8-AE67-657A6BD77FA2	TCGA-CK-5912	NO		140	YES		22	30	0	F98F1AAC-1524-4CC6-BE2C-CB5D5106E463	Scheduled Follow-up Submission		NO	No	YES	NO	NA			NO	NA	NO		12	1	NO	NA	NA	NA	NA	NA	Yes	MX	N0	T2	5912	NO		NO	1.3		Complete Remission/Response	NO
TCGA-CM-4750-01A	34	76.78.0	Nationwide Children's Hospital	TCGA-CM-4750-F9913	b016c66b-e66a-42b2-91df-5c97284dabe1	TCGA-CM-4750	NO		4	YES		22	24	0	4A1E64CC-129B-4AA6-B74D-A6A4FC49F84A			YES	No	YES	NO	NA		YES		52	YES		12	1	NO	NA	0	NA	2	NA	No	M0	N1b	T1	4750	NO	TUMOR FREE	YES	1	YES		NO
TCGA-AU-3779-01A	80	116.77.0	Nationwide Children's Hospital	TCGA-AU-3779-F43364	ADD6727D-E925-44B7-A783-A73B0DE32940	TCGA-AU-3779	NO		35	NO		22	20	0	070F3F83-1B41-4C3F-B495-1D9F970613D4	Scheduled Follow-up Submission		YES	No	YES	NO	NA		NO	NO	21	NO	NO	12	5	NO	NA	0	0	0	0	No	M0	N0	T3	3779	NO		NO	NA	YES		NO
TCGA-AA-3519-01A	63	28.86.0	Nationwide Children's Hospital	TCGA-AA-3519-F37293	F4BE0EA6-7463-4E03-A667-39E8FF29CE0C	TCGA-AA-3519	NO		NA			22	1	0	FA607C7F-7107-47BF-8FB0-235F6757A096	Scheduled Follow-up Submission	Complete Remission/Response	YES	No	YES	NO	NA		NO	NO	43	NO		12	12		NA	0	NA	3	NA	No	M0	N1	T3	3519		TUMOR FREE	NO	1.26	YES	Complete Remission/Response	NO
TCGA-AA-A00D-01A	70	30.80.0	Nationwide Children's Hospital	TCGA-AA-A00D-F37925	9ACDD043-F212-4F96-AEF3-F58040EDEE2B	TCGA-AA-A00D	NO		NA			22	6	0	1CC3262B-0EB1-4A71-A227-70FF2D74FBE5	Scheduled Follow-up Submission	Complete Remission/Response	YES	No	YES	NO	NA		NO	NO	28	NO		12	12		NA	0	NA	0	NA	No	M0	N0	T2	A00D		TUMOR FREE	NO	1.02	YES	Complete Remission/Response	NO
TCGA-D5-6932-01A	69	157.71.0	Nationwide Children's Hospital	TCGA-D5-6932-F29862	790E3205-F033-455F-8318-57634526CFA3	TCGA-D5-6932	NO		NA	YES		22	29	0	77DE4F7D-1354-42C0-BC6E-94C6CF344BB4	Scheduled Follow-up Submission		NO	No	YES	NO	NA		NO		11	NO		12	3	NO	NA	0	NA	0	NA	No	M0	N0	T3	6932	YES		NO	3.8	YES		NO
TCGA-G4-6321-01A	60	116.77.0	Nationwide Children's Hospital	TCGA-G4-6321-F21916	fe9a60d5-5c9b-4650-95dd-92820bf57f9f	TCGA-G4-6321	NO		110	YES		22	30	0	DA564405-BED0-4356-B4E1-05F6E3E684DC	Scheduled Follow-up Submission		YES	No	YES	NO	NA		YES		44	NO	YES	12	1	NO	NA	0	NA	3	NA	Yes	MX	N1	T2	6321	NO	TUMOR FREE	YES	3.4	YES		NO
TCGA-DM-A1DB-01A	68	132.71.0	Nationwide Children's Hospital	TCGA-DM-A1DB-F19082	195A04DA-878F-47BB-969C-1461D9C4FEA2	TCGA-DM-A1DB	YES	Normal	NA			22	2	0	8918AAF4-AFD0-450D-BBB2-E50601B25AFE	Scheduled Follow-up Submission			No	YES	YES	NA	NO			7	NO	NO	12	12		1	0	5	0	NA	No	M0	N0	T3	A1DB				NA	YES
TCGA-AA-3672-01A	90	36.83.0	Nationwide Children's Hospital	TCGA-AA-3672-F37523	2FB64AB5-5FC7-4A29-A92B-826B4A5E9CE4	TCGA-AA-3672	NO		NA			22	3	0	7060758D-227A-4098-A89F-1E25D2F5292E	Scheduled Follow-up Submission		NO	No	YES	NO	NA		NO	NO	21	NO		12	12		NA	0	NA	4	NA	Yes	M0	N1	T3	3672		TUMOR FREE	NO	1.27	YES		NO
TCGA-F4-6806-01A	59	138.78.0	Nationwide Children's Hospital	TCGA-F4-6806-F35082	7167D161-1831-4A9E-81D8-75818C0CF5F9	TCGA-F4-6806	NO		NA	NO		22	27	0	2C01D99D-E209-4A22-B670-073A1E1DFF31	Scheduled Follow-up Submission	Complete Remission/Response	NO	No	YES	NO	NA		NO	NO	5	NO	NO	12	9	NO	0	NA	0	0	0	No	M0	N0	T2	6806	NO	TUMOR FREE	YES	NA	YES	Complete Remission/Response	NO
TCGA-AD-6899-01A	84	157.71.0	Nationwide Children's Hospital	TCGA-AD-6899-F47188	1C49AF32-BFF3-4B1C-96B5-4BE89D2C0AB5	TCGA-AD-6899			1	NO		22	22	0	BBF04AB7-BE17-4370-AF3C-2F8936646B28	Scheduled Follow-up Submission	Complete Remission/Response	NO	No	YES	NO	NA			NO	20	YES		12	8	NO	NA	0	NA	17	NA	No	MX	N2b	T4a	6899		TUMOR FREE	NO	6.1	YES	Complete Remission/Response	NO
TCGA-CM-6167-01A	57	89.77.0	Nationwide Children's Hospital	TCGA-CM-6167-F13937	d46c7031-cf91-4f95-843b-d7b96a01aa12	TCGA-CM-6167	NO		NA	YES		22	19	0	057A2887-EE24-4349-B665-9E07D086F261	Scheduled Follow-up Submission		NO	No	YES	NO	NA		YES		40	YES		12	7	YES	NA	0	NA	11	NA	No	M0	N2b	T3	6167	YES	TUMOR FREE	YES	5.5	YES		NO
TCGA-AA-3950-01A	79	41.78.0	Nationwide Children's Hospital	TCGA-AA-3950-F37980	F6FB6CCD-DAA1-4F96-A6EC-A69815E2AB1D	TCGA-AA-3950	NO		NA			22	8	0	2982297C-9BCD-4E04-A1AB-F7815035A6CB	Scheduled Follow-up Submission	Complete Remission/Response	NO	No	YES	NO	NA		NO	NO	17	NO		12	12		NA	2	NA	0	NA	Yes	M0	N0	T3	3950		TUMOR FREE	NO	NA	YES	Complete Remission/Response	NO
TCGA-F4-6570-01A	78	123.74.0	Nationwide Children's Hospital	TCGA-F4-6570-F29806	2BFF0D84-1719-401B-9A98-83D0477A9CD7	TCGA-F4-6570	NO		NA			22	29	0	1F6D6164-6F33-4EE1-A2F2-9B709B511ABA	Scheduled Follow-up Submission			No	YES	NO	NA				16	NO		12	3	NO	NA	0	NA	0	0	No	M0	N0	T3	6570	NO	TUMOR FREE	NO	NA	YES		NO
TCGA-DM-A28C-01A	74	154.69.0	Nationwide Children's Hospital	TCGA-DM-A28C-F19041	5E611E2B-F4B7-4940-95A5-D4744C57536A	TCGA-DM-A28C	NO		NA	YES		22	2	0	73F12B29-7438-447E-B049-7079267709F5	Scheduled Follow-up Submission		NO	No	YES	NO	NA				11			12	12		0	1	0	0	NA	No	M0	N0	T3	A28C				NA	YES
TCGA-A6-2675-01A	78	116.77.0	Nationwide Children's Hospital	TCGA-A6-2675-F13533	a2ead2c9-c7e6-40a7-9b9e-d0695b739978	TCGA-A6-2675	NO		NA	NO		22	18	0	D604A45F-B417-4274-827E-48398CC1C459			NO	No	YES	NO	NA		NO		11	NO		12	7	NO	NA	2	NA	0	NA	No	MX	N0	T3	2675		TUMOR FREE	NO	NA	YES		NO
TCGA-AA-3518-01A	81	29.82.0	Nationwide Children's Hospital			TCGA-AA-3518	NO		NA			22	NA	0	CFC45DF4-7BD9-43BC-806B-264A60ACCB9E			YES	No	YES	NO	NA		NO		27	NO		12	NA		NA	0	NA	0	NA	No	M0	N0	T3	3518				1.48	YES
TCGA-AA-3517-01A	60	28.86.0	Nationwide Children's Hospital	TCGA-AA-3517-F37289	C1D7F57B-5339-487C-934B-91305B8E0B01	TCGA-AA-3517	NO		NA			22	1	0	93B36D64-A699-4AEC-AE7F-118A39558661	Scheduled Follow-up Submission	Complete Remission/Response	YES	No	YES	NO	NA		NO	NO	54	NO		12	12		NA	0	NA	0	NA	No	M0	N0	T3	3517		TUMOR FREE	YES	1.23	YES	Complete Remission/Response	NO
TCGA-AY-A8YK-01A	44	422.38.0	Nationwide Children's Hospital	TCGA-AY-A8YK-F70633	35FF010C-C88E-44BF-ABFC-F936C4474116	TCGA-AY-A8YK	NO		NA	NO		22	26	0	FA75E0F1-AD8C-45DD-917A-1C8C24F5DEBB	Scheduled Follow-up Submission	Complete Remission/Response	NO	No	YES	NO	NA		YES	NO	24	YES	NO	12	2	NO	NA	0	NA	6	NA	No	M1	N2a	T3	A8YK	NO	TUMOR FREE	YES	5.9	YES	Complete Remission/Response	NO
TCGA-AY-5543-01A	65	89.77.0	Nationwide Children's Hospital	TCGA-AY-5543-F19913	cf329ba5-376f-4a12-bdac-b79cc97cf52f	TCGA-AY-5543	NO		NA	NO		22	4	0	6C598A01-8D73-4950-954F-359C0EA11224			NO	No	YES	NO	NA				24	NO	NO	12	1	YES	NA	0	NA	1	NA	No	M1	N1a	T3	5543	NO	TUMOR FREE	YES	NA	YES		NO
TCGA-D5-6531-01A	75	116.77.0	Nationwide Children's Hospital	TCGA-D5-6531-F28622	b98f9c34-3631-493a-81d5-b49fe9ffe73f	TCGA-D5-6531			NA			22	27	0	D6C235F0-6095-47F7-BF3E-478F80A923E6	Scheduled Follow-up Submission		NO	No	YES	NO	NA		NO		4	NO		12	2	NO	NA	NA	NA	0	0	No	M0	N0	T3	6531	NO	TUMOR FREE	NO	1.9	YES		NO
TCGA-AA-A00E-01A	65	30.80.0	Nationwide Children's Hospital	TCGA-AA-A00E-F37929	EAA0C903-F259-42FE-B068-C337AAADC9CF	TCGA-AA-A00E	NO		NA			22	6	0	6EF72430-0CA6-4E6E-8A85-A64AA3F3AABE	Scheduled Follow-up Submission	Complete Remission/Response	NO	No	YES	NO	NA		NO	NO	41	NO		12	12		NA	0	NA	0	NA	No	M0	N0	T3	A00E		TUMOR FREE	NO	10.56	YES	Complete Remission/Response	NO
TCGA-AA-3688-01A	80	36.83.0	Nationwide Children's Hospital	TCGA-AA-3688-F38093	E1BC44E9-B580-412A-ACA6-1C7EAF2A713F	TCGA-AA-3688	NO		NA			22	10	0	601B8015-AF63-4CCE-B008-0351DD4FA310	Scheduled Follow-up Submission	Progressive Disease	NO	No	YES	NO	NA		NO	NO	13	YES		12	12		NA	1	NA	2	NA	Yes	M1	N1	T3	3688		WITH TUMOR	NO	47.45	YES	Progressive Disease	NO
TCGA-A6-6652-01A	59	123.74.0	Nationwide Children's Hospital	TCGA-A6-6652-F30458	7a5cef72-d273-467d-92ef-9bef3e3d1d5e	TCGA-A6-6652	NO		NA	YES		22	19	0	B04F8B8F-6D2C-478C-B4EF-10FC0B3BCD76				No	YES	NO	NA		YES		22	NO	NO	12	4		0	0	5	0	NA	No	M1	N0	T3	6652		WITH TUMOR	YES	4.8	YES		NO
TCGA-CM-4743-01A	69	116.77.0	Nationwide Children's Hospital	TCGA-CM-4743-F6606	115cfd38-5ab8-4f5d-abe3-f04bf8655d6a	TCGA-CM-4743	NO		NA	NO		22	24	0	BE762442-D9FD-44E8-A2E0-49B5A3DD3002			NO	No	YES	NO	NA		NO		27	YES		12	1	NO	NA	0	NA	0	NA	No	M0	N0	T3	4743	NO	TUMOR FREE	YES	4	YES		NO
TCGA-CA-5796-01A	52	89.77.0	Nationwide Children's Hospital	TCGA-CA-5796-F20290	6b8c57bf-a08b-4dd1-a462-d20602837e61	TCGA-CA-5796			NA			22	9	0	ADDBB4DE-588A-4670-9E5F-6F4378892112				No	YES		NA				NA			12	1		NA	NA	NA	NA	NA	No	M0	N0	T3	5796		TUMOR FREE	YES	NA	NO		NO
TCGA-AZ-4615-01A	84	76.78.0	Nationwide Children's Hospital	TCGA-AZ-4615-F19857	c0630af6-c2eb-4c0b-8452-cbb1963a40ee	TCGA-AZ-4615			50			22	30	0	A0264FD0-C03E-42FE-9FC0-125402676942				No	YES	YES	NA	NO			18	YES		12	12		NA	1	NA	1	NA	No	M0	N1	T3	4615	NO	WITH TUMOR	YES	2.1	YES		NO
TCGA-AZ-6599-01A	72	123.74.0	Nationwide Children's Hospital	TCGA-AZ-6599-F34146	EA99C322-2FBC-4A46-B456-B22E30205E6F	TCGA-AZ-6599			NA			22	31	0	6D985917-72BA-4C46-81C1-15AEF4BC3396	Scheduled Follow-up Submission	Complete Remission/Response		No	YES		NA			NO	25	NO		12	7		NA	NA	NA	0	NA	No	MX	N0	T2	6599	NO	TUMOR FREE	NO	NA	YES	Complete Remission/Response	NO
TCGA-3L-AA1B-01A	61	385.43.0	Nationwide Children's Hospital	TCGA-3L-AA1B-F67516	8AEC4573-0E07-4BFC-A1A7-FF843D3D447A	TCGA-3L-AA1B	NO		NA	YES		22	6	0	BF669F52-D312-49DA-A2C5-70623DCDC809	Scheduled Follow-up Submission		YES	No	YES	NO	NA		YES	NO	28	NO	NO	12	11	NO	NA	0	NA	0	0	No	M0	N0	T2	AA1B	NO		NO	NA	YES	Complete Remission/Response	NO
TCGA-CK-5915-01A	63	89.77.0	Nationwide Children's Hospital	TCGA-CK-5915-F39695	F6177CAD-6A95-4C97-9576-A851E544A1CC	TCGA-CK-5915	NO		NA	YES		22	30	0	3C0E610B-F17F-458F-83C1-979DD8087FCC	Scheduled Follow-up Submission		YES	No	YES	NO	NA			YES	NA	NO		12	1	NO	NA	NA	NA	NA	NA	No	MX	N0	T2	5915	NO			NA
TCGA-F4-6854-01A	77	157.71.0	Nationwide Children's Hospital	TCGA-F4-6854-F35416	D0EEDBBB-5F9B-4DD4-A2E5-8A42EA4E34B3	TCGA-F4-6854	NO		NA	NO		22	26	0	D4087288-A96D-41AF-B295-BEC7FC7FBF87	Scheduled Follow-up Submission	Complete Remission/Response	NO	No	YES	NO	NA	NO	NO	YES	8	NO		12	9	NO	0	NA	0	0	0	No	M0	N0	T3	6854	NO	TUMOR FREE	NO	NA	YES	Complete Remission/Response	NO
TCGA-AZ-4315-01A	61	76.78.0	Nationwide Children's Hospital	TCGA-AZ-4315-F19854	d385c440-824e-4c54-b439-999e2a62ffed	TCGA-AZ-4315			5			22	29	0	1E6A5324-1D23-4449-A21D-042C81653A7B				No	YES		NA				0	NO		12	12	YES	NA	0	NA	NA	NA	No	M0	N0	T3	4315	NO	TUMOR FREE	NO	1.5	YES		NO
TCGA-AA-A017-01A	57	33.79.0	Nationwide Children's Hospital	TCGA-AA-A017-F37309	55613C48-F696-4E1E-8215-9DAA5B91E579	TCGA-AA-A017	NO		NA			22	1	0	2EEC2AA6-8174-4EDB-999B-5A553DD230F4	Scheduled Follow-up Submission	Complete Remission/Response	NO	No	YES	NO	NA		NO	NO	18	YES		12	12		NA	0	NA	0	NA	No	M0	N0	T3	A017		TUMOR FREE	NO	NA	YES	Complete Remission/Response	NO
TCGA-AZ-4684-01A	49	76.78.0	Nationwide Children's Hospital	TCGA-AZ-4684-F19861	6fd93547-1428-44dd-a46a-42c1afdb9de0	TCGA-AZ-4684			34			22	30	0	B0D5CFCD-06E9-4F56-A8AA-039482D444EE				No	YES		NA				12	YES		12	12	YES	NA	NA	NA	10	10	No	M1	N2	T3	4684		WITH TUMOR	NO	8.9	YES		NO
TCGA-AA-A02H-01A	74	33.79.0	Nationwide Children's Hospital			TCGA-AA-A02H	NO		NA			22	NA	0	D557A1E2-27C4-48DD-B470-324FA67B967A			NO	No	YES	NO	NA		NO		12	YES		12	NA		NA	0	NA	6	NA	No	M1	N2	T3	A02H				1387	YES
TCGA-CM-6676-01A	82	138.78.0	Nationwide Children's Hospital	TCGA-CM-6676-F15608	be3a979e-245a-4e31-9c10-33b9d6044520	TCGA-CM-6676	NO		NA	NO		22	26	0	D8B7E0F4-4D8E-4629-9EBA-1C95B36A8611	Scheduled Follow-up Submission		NO	No	YES	NO	NA		NO		17	YES		12	8	NO	NA	0	NA	0	1	No	M0	N0	T2	6676	NO	TUMOR FREE	NO	4.5	YES		NO
TCGA-AA-A03F-01A	90	66.81.0	Nationwide Children's Hospital	TCGA-AA-A03F-F72573	33151CF1-B174-4AA8-9CC4-41354018B4F6	TCGA-AA-A03F	NO		NA			22	24	0	832FAC8D-2DA4-42C5-B6D6-29709F1016AA	Scheduled Follow-up Submission		NO	No	YES	NO	NA		NO	NO	29			12	7		NA	0	NA	4	NA	No	M0	N2	T3	A03F			NO	1.09	YES		NO
TCGA-A6-5657-01A	65	89.77.0	Nationwide Children's Hospital	TCGA-A6-5657-F12381	2a00b819-eef2-417d-b86f-364469b808cf	TCGA-A6-5657	NO		NA	NO		22	31	0	EBCC28CA-877F-47D2-A1F3-1679DBED7337			NO	No	YES	NO	NA		NO		42	YES		12	5	NO	NA	0	NA	1	NA	No	M0	N1	T3	5657		TUMOR FREE	YES	1.5	YES		NO
TCGA-A6-A567-01A	56	300.56.0	Nationwide Children's Hospital	TCGA-A6-A567-F42414	5F11CCA6-115A-4400-B869-884FB7517976	TCGA-A6-A567			NA	YES		22	18	0	35EEA297-CB6A-4DB6-B5D3-B368B1BCC97E	Additional New Tumor Event	Progressive Disease	NO	No	YES	YES	NA			NO	41	YES		12	4	YES	NA	0	NA	3	NA	No	M1	N1	T3	A567		WITH TUMOR	NO	95.8	YES		NO
TCGA-A6-2684-01A	75	76.78.0	Nationwide Children's Hospital	TCGA-A6-2684-F6663	a2305654-87da-4065-ba07-a491bdefd6d9	TCGA-A6-2684	NO		NA	NO		22	24	0	27E8FE24-F274-49D6-8469-7213E1E4AA7D			YES	No	YES	NO	NA				33	NO		12	1	NO	NA	0	NA	0	NA	No	M0	N0	T2	2684		TUMOR FREE	NO	NA	YES		NO
TCGA-A6-2684-01C	75	76.78.0	Nationwide Children's Hospital	TCGA-A6-2684-F6663	a2305654-87da-4065-ba07-a491bdefd6d9	TCGA-A6-2684	NO		NA	NO		22	24	0	27E8FE24-F274-49D6-8469-7213E1E4AA7D			YES	No	YES	NO	NA				33	NO		12	1	NO	NA	0	NA	0	NA	No	M0	N0	T2	2684		TUMOR FREE	NO	NA	YES		NO
TCGA-AA-3509-01A	54	76.78.0	Nationwide Children's Hospital	TCGA-AA-3509-F37280	F82867D0-C02A-4BD0-9EDF-21A2F99B3F5D	TCGA-AA-3509	NO		NA			22	1	0	85DE2C7D-E28A-4207-8032-0DEB47165926	Scheduled Follow-up Submission	Complete Remission/Response	NO	No	YES	NO	NA		NO	NO	27	NO		12	12		NA	0	NA	0	NA	No	M0	N0	T3	3509		TUMOR FREE	NO	2.82	YES	Complete Remission/Response	NO
TCGA-AA-3506-01A	77	76.78.0	Nationwide Children's Hospital	TCGA-AA-3506-F37277	C40D3DA3-C685-44E7-BB2F-A9479B871988	TCGA-AA-3506	NO		NA			22	1	0	4C90E8CD-0883-47FE-94DE-FDFEB08C0822	Scheduled Follow-up Submission			No	YES	NO	NA		NO	NO	46			12	12		NA	0	NA	0	NA	Yes	M0	N0	T2	3506			NO	2.08	YES		NO
TCGA-AD-6895-01A	84	157.71.0	Nationwide Children's Hospital	TCGA-AD-6895-F47141	783101A7-E808-4F09-A2E9-5D0BDEF470AE	TCGA-AD-6895	NO		1	NO		22	22	0	E2D4CA85-2A38-4A92-800C-118886105C0B	Scheduled Follow-up Submission	Complete Remission/Response		No	YES	NO	NA		NO	NO	17	YES		12	8	NO	NA	0	NA	1	NA	Yes	M0	N1a	T3	6895		TUMOR FREE	NO	NA	YES	Complete Remission/Response	NO
TCGA-CM-5868-01A	59	89.77.0	Nationwide Children's Hospital	TCGA-CM-5868-F13899	6b4da54c-2e36-46c3-b0d2-73f762416ccd	TCGA-CM-5868	YES	Normal	NA	NO		22	18	0	2B5341C9-940D-4494-882E-9E802F0BAA10	Scheduled Follow-up Submission		NO	No	YES	YES	NA	NO	NO		17	YES		12	7	YES	NA	0	NA	1	NA	No	M1a	N1a	T4a	5868	YES	WITH TUMOR	YES	93	YES		NO
TCGA-D5-5541-01A	63	89.77.0	Nationwide Children's Hospital	TCGA-D5-5541-F13832	2de2e12a-db7f-4273-b7b7-ce76fb26a638	TCGA-D5-5541	NO		36	NO		22	4	0	E92E7B6F-92D0-4C2D-9C43-D2E9BD2BE217	Scheduled Follow-up Submission		NO	No	YES	NO	NA		NO		8	NO		12	7	NO	NA	0	NA	1	0	No	M0	N1a	T3	5541	NO	TUMOR FREE	YES	2.3	YES		NO
TCGA-AA-A00O-01A	83	33.79.0	Nationwide Children's Hospital	TCGA-AA-A00O-F37318	CA52500B-891D-48D2-B9C0-61527674AD59	TCGA-AA-A00O	NO		NA			22	1	0	9C2A7A45-2515-49A3-8277-1DB687B37441	Scheduled Follow-up Submission	Complete Remission/Response	NO	No	YES	NO	NA		NO	NO	40	YES		12	12		NA	0	NA	32	NA	No	M0	N2	T3	A00O			NO	3.25	YES		NO
TCGA-AZ-4616-01A	82	138.78.0	Nationwide Children's Hospital	TCGA-AZ-4616-F19858	7c0436fc-b486-4981-a45d-a209f91e7e77	TCGA-AZ-4616			NA			22	30	0	F9BE6BDA-212C-45E6-BFA7-511BA54C5598				No	YES		NA				23	YES		12	12		NA	NA	NA	13	NA	No	M1	N2	T3	4616	YES	WITH TUMOR	YES	NA	YES		NO
TCGA-AA-3561-01A	72	28.86.0	Nationwide Children's Hospital	TCGA-AA-3561-F37515	CF705B43-4F5B-42BB-8DC6-5B6E7F015D20	TCGA-AA-3561	NO		NA			22	3	0	2F95EAB1-26D3-4F6A-8BD0-C094E6FC1569	Scheduled Follow-up Submission	Complete Remission/Response	YES	No	YES	NO	NA		NO	NO	50	NO		12	12		NA	0	NA	NA	NA	No	M0	N0	T3	3561		TUMOR FREE	NO	NA	YES	Complete Remission/Response	NO
TCGA-AZ-4313-01A	51	76.78.0	Nationwide Children's Hospital	TCGA-AZ-4313-F19853	645fd1e4-91f1-4aac-816c-6846831bd5ce	TCGA-AZ-4313			12			22	29	0	794E4AD5-8BA8-4E13-80B7-08EDB7A0FD9B				No	YES		NA				13	YES		12	12	NO	NA	0	NA	0	NA	Yes	M0	N0	T1	4313	NO	TUMOR FREE	NO	5.9	YES		NO
TCGA-D5-6530-01A	53	116.77.0	Nationwide Children's Hospital	TCGA-D5-6530-F28927	810c037c-fbfe-4fd0-9bda-09511085edda	TCGA-D5-6530	NO		40	NO		22	2	0	60A83767-9045-49DC-AE24-3D7BCF38C10E	Scheduled Follow-up Submission			No	YES	NO	NA				15	NO		12	3	NO	NA	NA	NA	0	NA	No	M0	N0	T2	6530	YES	TUMOR FREE	NO	3.5	YES		NO
TCGA-DM-A282-01A	60	154.69.0	Nationwide Children's Hospital	TCGA-DM-A282-F19063	F8D1B315-42FE-4F86-89FC-739790CD55F9	TCGA-DM-A282	YES	Normal	NA	NO		22	5	0	42083965-AFBE-4031-B9E9-588C63A4BA16	Scheduled Follow-up Submission		NO	No	YES	YES	NA	NO			16	NO	NO	12	12		0	0	5	0	NA	No	M0	N0	T3	A282				NA	YES
TCGA-CA-6715-01A	63	138.78.0	Nationwide Children's Hospital	TCGA-CA-6715-F70873	0386CE41-CC4D-4F0D-89FE-56E3E6574DD8	TCGA-CA-6715			NA			22	10	0	B43628E7-9651-458B-A2CB-1418B8730D4E	Scheduled Follow-up Submission	Complete Remission/Response		No	YES		NA			NO	2			12	3		NA	NA	NA	1	NA	No	M0	N1	T3	6715		TUMOR FREE	YES	NA	YES	Complete Remission/Response	NO
TCGA-AD-6889-01A	76	157.71.0	Nationwide Children's Hospital	TCGA-AD-6889-F47705	B963390E-6F5F-4C35-8A72-0C6A8794954E	TCGA-AD-6889	NO		NA			22	28	0	89B1B018-B260-4BF4-BB98-865895F9FB9E	Scheduled Follow-up Submission	Complete Remission/Response		No	YES	NO	NA		NO	NO	16	NO		12	8		NA	1	NA	0	NA	No	M0	N0	T3	6889		TUMOR FREE	YES	7.5	YES	Complete Remission/Response	NO
TCGA-CK-5916-01A	71	89.77.0	Nationwide Children's Hospital	TCGA-CK-5916-F39677	979BC2CE-B529-4A5F-9037-AB91E6C3BC2E	TCGA-CK-5916	NO		NA	NO		22	29	0	AFA40EF3-23B5-46CE-9D8A-23C17E797EE2	Scheduled Follow-up Submission	Progressive Disease	YES	No	YES	NO	NA			NO	NA	YES		12	1	NO	NA	NA	NA	NA	NA	No	M0	N0	T1	5916	NO	WITH TUMOR	NO	3.2		Progressive Disease	NO
TCGA-AA-A01I-01A	76	33.79.0	Nationwide Children's Hospital	TCGA-AA-A01I-F37300	ED9F7290-E92C-4628-A0CF-1F9B300F2FE6	TCGA-AA-A01I	NO		NA			22	1	0	87B941D0-DDAA-458F-819C-B4F25AE00CDC	Scheduled Follow-up Submission	Complete Remission/Response	YES	No	YES	NO	NA		NO	NO	36	NO		12	12		NA	0	NA	0	NA	No	M0	N0	T2	A01I		TUMOR FREE	NO	NA	YES	Complete Remission/Response	NO
TCGA-A6-3808-01A	73	41.78.0	Nationwide Children's Hospital	TCGA-A6-3808-F2179	0a57e86e-33d6-40cf-b318-94665c630ef9	TCGA-A6-3808	NO		NA	NO		22	11	0	0C9CB20B-E98D-44EC-8585-EBED2249F535			YES	No	YES	NO	NA		NO		24	NO	NO	12	10	NO	0	0	4	0	NA	No	M0	N0	T3	3808		TUMOR FREE	NO	NA	YES		NO
TCGA-A6-6780-01A	74	138.78.0	Nationwide Children's Hospital	TCGA-A6-6780-F29585	9586e98f-8c22-4669-b122-303b77295180	TCGA-A6-6780	NO		NA	NO		22	23	0	37AA97F9-9BCB-41F3-80C7-75D178F4821F			YES	No	YES	NO	NA				18	NO		12	3	NO	NA	0	NA	0	NA	No	MX	N0	T3	6780		TUMOR FREE	NO	NA	YES		NO
TCGA-A6-6780-01B	74	138.78.0	Nationwide Children's Hospital	TCGA-A6-6780-F29585	9586e98f-8c22-4669-b122-303b77295180	TCGA-A6-6780	NO		NA	NO		22	23	0	37AA97F9-9BCB-41F3-80C7-75D178F4821F			YES	No	YES	NO	NA				18	NO		12	3	NO	NA	0	NA	0	NA	No	MX	N0	T3	6780		TUMOR FREE	NO	NA	YES		NO
TCGA-DM-A1D6-01A	88	132.71.0	Nationwide Children's Hospital	TCGA-DM-A1D6-F19075	A78E9FF2-0513-4D6C-BAF0-B214AF995AC0	TCGA-DM-A1D6	YES	Normal	NA			22	2	0	F2E341FB-ABF6-4A33-B37F-C405E3118716	Scheduled Follow-up Submission		NO	No	YES	YES	12	YES			6	NO	NO	12	12		0	0	5	0	NA	No	M0	N0	T3	A1D6				NA	YES
TCGA-AA-3811-01A	84	41.78.0	Nationwide Children's Hospital	TCGA-AA-3811-F38105	5A316774-DC19-48A9-BAB0-C37335014C2F	TCGA-AA-3811	NO		NA			22	10	0	68E123CB-2CBF-4E1C-98F9-3F8906D29503	Scheduled Follow-up Submission		NO	No	YES	NO	NA		NO	NO	15	YES		12	12		NA	0	NA	5	NA	No	M0	N2	T3	3811			NO	3.4	YES		NO
TCGA-AA-3494-01A	55	76.78.0	Nationwide Children's Hospital			TCGA-AA-3494	NO		NA			22	NA	0	B508C874-31B9-4357-99A9-ACD7A6CF49BA			NO	No	YES	NO	NA		NO		39			12	NA		NA	0	NA	0	NA	No	M1	N0	T3	3494				261.3	YES
TCGA-CK-6748-01A	45	138.78.0	Nationwide Children's Hospital	TCGA-CK-6748-F14836	7c6318a3-89f9-4a1e-a49c-6a4c2c6c2f4d	TCGA-CK-6748	NO		26	NO		22	NA	0	EA78B602-1566-4FFD-BCE7-1166DCDF81EC			NO	No	YES	YES	12	YES	NO		NA	NO	NO	12	8	NO	0	NA	10	NA	NA	No	M1	N1	T3	6748	NO	WITH TUMOR	NO	400.26			NO
TCGA-AA-A01V-01A	59	66.81.0	Nationwide Children's Hospital			TCGA-AA-A01V	NO		NA			22	NA	0	A32B21EF-8996-43C7-A41A-8E7D8DF65991			NO	No	YES	NO	NA		NO		15			12	NA		NA	0	NA	0	NA	No	M0	N0	T2	A01V				4.09	YES
TCGA-AA-3994-01A	69	45.80.0	Nationwide Children's Hospital	TCGA-AA-3994-F37935	32EEB948-E325-44CE-BCA5-13765A63879F	TCGA-AA-3994	NO		NA			22	6	0	DD7E778F-C979-4047-A97D-64AB067D0FD1	Scheduled Follow-up Submission	Complete Remission/Response	YES	No	YES	NO	NA		NO	NO	24	NO		12	12		NA	1	NA	2	NA	No	M0	N1	T3	3994		TUMOR FREE	YES	3.52	YES	Complete Remission/Response	NO
TCGA-D5-6929-01A	49	157.71.0	Nationwide Children's Hospital	TCGA-D5-6929-F29897	AE4CEDC0-70C2-4922-83B7-7E89FD9C9274	TCGA-D5-6929	NO		NA	NO		22	30	0	550952A0-76FE-4FDF-A4D5-E1C0FDBD7CBF	Scheduled Follow-up Submission		NO	No	YES	NO	NA		NO		12	YES		12	3	YES	NA	1	NA	1	NA	No	M1	N1	T3	6929	YES	TUMOR FREE	YES	4.5	YES		NO
TCGA-CM-6674-01A	39	138.78.0	Nationwide Children's Hospital	TCGA-CM-6674-F15641	fbb8b7f0-a9ac-4747-b89a-15a5cc8bbf66	TCGA-CM-6674	NO		NA	NO		22	NA	0	A5497683-3F0E-4A19-A150-27A79A3261A6	Scheduled Follow-up Submission		NO	No	YES	NO	NA		YES		43	NO		12	8	NO	NA	1	NA	0	NA	No	M0	N0	T3	6674	NO	TUMOR FREE	NO	1.1	YES		NO
TCGA-A6-3810-01A	62	41.78.0	Nationwide Children's Hospital	TCGA-A6-3810-F4956	221709cd-63c8-4056-a34f-5439af646d1e	TCGA-A6-3810	NO		NA	NO		22	19	0	ECE57F61-78F8-441F-A9F7-8771050FAD05			YES	No	YES	NO	NA				30	NO		12	10	NO	NA	0	NA	0	0	No	M0	N0	T3	3810		TUMOR FREE	NO	1.7	YES		NO
TCGA-A6-3810-01B	62	41.78.0	Nationwide Children's Hospital	TCGA-A6-3810-F4956	221709cd-63c8-4056-a34f-5439af646d1e	TCGA-A6-3810	NO		NA	NO		22	19	0	ECE57F61-78F8-441F-A9F7-8771050FAD05			YES	No	YES	NO	NA				30	NO		12	10	NO	NA	0	NA	0	0	No	M0	N0	T3	3810		TUMOR FREE	NO	1.7	YES		NO
TCGA-CK-5913-01A	58	89.77.0	Nationwide Children's Hospital	TCGA-CK-5913-F39698	DE4032FA-32BB-4738-A068-53A1EFB5A0FC	TCGA-CK-5913	YES	Normal	2	NO		22	30	0	13DFF8B6-8044-4EB8-AFFB-E914848BDC8D	Scheduled Follow-up Submission	Complete Remission/Response	NO	No	YES	NO	NA		YES	NO	NA	NO	YES	12	1	NO	9	NA	10	NA	NA	No	MX	N0	T3	5913	NO	TUMOR FREE	NO	0.6		Complete Remission/Response	NO
TCGA-G4-6625-01A	77	123.74.0	Nationwide Children's Hospital	TCGA-G4-6625-F21901	055b44fa-ba11-4899-984d-01306fe1c57d	TCGA-G4-6625	NO		NA	YES		22	2	0	543F0D7B-503B-423A-8BEA-4B6416E6D0FF	Scheduled Follow-up Submission		NO	No	YES	NO	NA		NO		18	NO		12	2	NO	NA	0	NA	0	NA	Yes	M0	N0	T3	6625	NO	TUMOR FREE	NO	5.5	YES		NO
TCGA-A6-2679-01A	73	76.78.0	Nationwide Children's Hospital	TCGA-A6-2679-F6153	fea92304-47d4-48da-825e-f392753ab136	TCGA-A6-2679	NO		NA	NO		22	14	0	EFC95944-5AD8-4E7F-AC70-F2A68C165342			YES	No	YES	NO	NA				16	NO		12	1	NO	NA	0	NA	0	0	No		N0	T3	2679		TUMOR FREE	NO	15.7	YES		NO
TCGA-AA-A02E-01A	82	33.79.0	Nationwide Children's Hospital			TCGA-AA-A02E	NO		NA			22	NA	0	1B3EF1E9-5EA7-44B5-8416-62919988C5F4			NO	No	YES	NO	NA		NO		16	YES		12	NA		NA	0	NA	4	NA	No	M1	N1	T3	A02E				441.9	YES
TCGA-F4-6461-01A	41	123.74.0	Nationwide Children's Hospital	TCGA-F4-6461-F29823	4B99A840-611B-4FF1-880C-E1E3FBA76407	TCGA-F4-6461	NO		NA	NO		22	29	0	2DCD0C28-C849-43DF-8E71-5E72AE856B00	Scheduled Follow-up Submission		NO	No	YES	NO	NA		NO		5	NO		12	3	NO	NA	NA	NA	5	0	No	M0	N2	T4b	6461	NO	WITH TUMOR	NO	NA	YES		NO
TCGA-AA-3662-01A	80	116.77.0	Nationwide Children's Hospital	TCGA-AA-3662-F37519	F088688F-498E-4403-8FCC-ADF69EF64C0C	TCGA-AA-3662	NO		NA			22	3	0	489CDD49-A8D4-4649-BEB2-B22DE6457970	Scheduled Follow-up Submission	Partial Remission/Response	YES	No	YES	NO	NA		NO	NO	15	NO		12	12		NA	1	NA	4	NA	Yes	M1	N2	T4	3662		WITH TUMOR	YES	1286	YES	Partial Remission/Response	NO
TCGA-AA-3973-01A	69	41.78.0	Nationwide Children's Hospital	TCGA-AA-3973-F37946	8B813650-4DEB-41F0-B373-EFA3FB00A0CC	TCGA-AA-3973	NO		NA			22	6	0	30A56DB3-B03E-4437-B046-3E5952715439	Scheduled Follow-up Submission	Stable Disease	NO	No	YES	NO	NA		NO	NO	21	YES		12	12		NA	1	NA	3	NA	No	M1	N1	T4	3973		WITH TUMOR	YES	375.2	YES	Stable Disease	NO
TCGA-A6-6651-01A	55	138.78.0	Nationwide Children's Hospital	TCGA-A6-6651-F18649	a004938c-4f52-49d0-a40c-d8f5558d23d5	TCGA-A6-6651	NO		NA	YES		22	21	0	6462DD79-6504-4451-8EF3-4E1BE9F76737			YES	No	YES	NO	NA		NO		33	YES		12	11	NO	NA	0	NA	2	NA	No	MX	N1b	T3	6651		TUMOR FREE	YES	0.4	YES		NO
TCGA-CA-6718-01A	46	138.78.0	Nationwide Children's Hospital	TCGA-CA-6718-F70854	18A956D9-89A5-4F2D-8F6D-E2C4A08BF25B	TCGA-CA-6718			NA			22	10	0	05FDF782-1BF5-4A0A-B7B3-BBFAEAAF533F	Scheduled Follow-up Submission	Progressive Disease		No	YES		NA			NO	NA			12	3		NA	NA	NA	NA	NA	No	M0	N0	T3	6718		WITH TUMOR	NO	NA	NO	Complete Remission/Response	NO
TCGA-AA-A010-01A	46	33.79.0	Nationwide Children's Hospital	TCGA-AA-A010-F37310	322EA713-ED84-4859-8741-62719504B7C0	TCGA-AA-A010	NO		NA			22	1	0	ACE5AEF6-2369-46C7-B78F-AFC877FA4D74	Scheduled Follow-up Submission	Complete Remission/Response	NO	No	YES	NO	NA		NO	NO	45	NO		12	12		NA	0	NA	0	NA	No	M0	N0	T4	A010		TUMOR FREE	YES	0.2	YES	Complete Remission/Response	NO
TCGA-AA-3821-01A	81	41.78.0	Nationwide Children's Hospital	TCGA-AA-3821-F38112	92E23E83-486C-42E4-B167-E3427F4420C7	TCGA-AA-3821	NO		NA			22	10	0	B6B1465B-431A-4435-B80A-2C8F86D2CF93	Scheduled Follow-up Submission		YES	No	YES	NO	NA		NO	NO	13			12	12		NA	0	NA	0	NA	No	M0	N0	T2	3821		TUMOR FREE	NO	2.14	YES		NO
TCGA-QG-A5YV-01A	64	300.56.0	Nationwide Children's Hospital	TCGA-QG-A5YV-F58611	958B8030-CB7F-4A51-A42C-D8BBCCB79DDD	TCGA-QG-A5YV	NO		4	NO		22	16	0	8ED8D01F-6179-4E9E-B877-1D4F709041C1	Scheduled Follow-up Submission	Complete Remission/Response	NO	No	YES	NO	NA		NO	NO	33	NO		12	4	NO	NA	0	NA	1	NA	No	MX	N1a	T4b	A5YV	NO	TUMOR FREE	YES	15.04	YES	Complete Remission/Response	NO
TCGA-CM-6169-01A	67	89.77.0	Nationwide Children's Hospital	TCGA-CM-6169-F13992	88c2fd3f-5dbc-4466-a5b0-faed1422f484	TCGA-CM-6169	NO		NA	NO		22	19	0	B1D95541-A157-46CA-825D-8B618DC15086	Scheduled Follow-up Submission		NO	No	YES	NO	NA		NO		19	YES		12	7	NO	NA	1	NA	0	NA	No	M0	N0	T3	6169	YES	TUMOR FREE	YES	4.6	YES		NO
TCGA-5M-AAT6-01A	40	422.38.0	Nationwide Children's Hospital	TCGA-5M-AAT6-F70107	783689E7-9A4D-45AD-81DF-3DE92AA8A28F	TCGA-5M-AAT6			NA	YES		22	27	0	1FA41166-87D4-495E-B48F-2349D88A41FB	Scheduled Follow-up Submission	Progressive Disease	NO	No	YES	NO	NA		NO	NO	11	YES		12	1	NO	NA	NA	NA	10	0	No	M1a	N2b	T4a	AAT6	YES	WITH TUMOR	YES	2.61	YES	Progressive Disease	NO
TCGA-AA-A01G-01A	63	30.80.0	Nationwide Children's Hospital	TCGA-AA-A01G-F37301	3D7DE0AF-DAF1-4C5A-9C19-5E6F3B70F99E	TCGA-AA-A01G	NO		NA			22	1	0	812BB56B-155D-423B-949A-07EBC2A77930	Scheduled Follow-up Submission	Complete Remission/Response	NO	No	YES	NO	NA		NO	NO	22	NO		12	12		NA	0	NA	0	NA	No	M0	N0	T3	A01G		TUMOR FREE	NO	NA	YES	Complete Remission/Response	NO
TCGA-AY-4070-01A	50	45.80.0	Nationwide Children's Hospital	TCGA-AY-4070-F3531	f27453aa-abaa-4a40-8c16-d2ccf73dff51	TCGA-AY-4070	NO		NA	NO		22	18	0	5898B8CA-8099-4465-A1FE-470884DD9AF3			NO	No	YES	YES	NA	NO	NO		15	YES		12	11	NO	NA	0	NA	5	0	No	M0	N2	T3	4070	YES	WITH TUMOR	YES	67.5	YES		NO
TCGA-AA-3655-01A	68	116.77.0	Nationwide Children's Hospital	TCGA-AA-3655-F37517	D0D562BA-4412-4082-ACE4-97CCEC788DE3	TCGA-AA-3655	NO		NA			22	3	0	7DDC0AE3-5423-4A34-99D5-2ADA47A40735	Scheduled Follow-up Submission	Complete Remission/Response	YES	No	YES	NO	NA		NO	NO	22	NO		12	12		NA	0	NA	0	NA	No	M0	N0	T3	3655		TUMOR FREE	NO	4	YES	Complete Remission/Response	NO
TCGA-AA-A00Q-01A	66	30.80.0	Nationwide Children's Hospital	TCGA-AA-A00Q-F37316	CF962324-805E-4A84-AFE0-43118E001C25	TCGA-AA-A00Q	NO		NA			22	1	0	DB3D0CE4-ACF8-47D4-A6AB-7CE0349C08EA	Scheduled Follow-up Submission	Complete Remission/Response	NO	No	YES	NO	NA		NO	NO	31	YES		12	12		NA	0	NA	1	NA	No	M0	N1	T4	A00Q		TUMOR FREE	YES	89.58	YES	Complete Remission/Response	NO
TCGA-DM-A28E-01A	72	154.69.0	Nationwide Children's Hospital	TCGA-DM-A28E-F19159	FB59BD36-E991-4383-95B9-B811AB68EC5B	TCGA-DM-A28E	YES	Normal	NA	YES		22	5	0	41DA556D-D24C-4542-A04B-3941DEFFEC48	Scheduled Follow-up Submission		NO	No	YES	YES	12	YES			15	NO		12	12		NA	0	NA	0	NA	No	M0	N0	T3	A28E				NA	YES
TCGA-CM-6171-01A	77	89.77.0	Nationwide Children's Hospital	TCGA-CM-6171-F14000	62e3d059-76c6-47f4-a0b9-94d611aabf49	TCGA-CM-6171	NO		NA	NO		22	19	0	F65D87E4-39AF-4621-B84E-5417ABD12F10	Scheduled Follow-up Submission		NO	No	YES	NO	NA		NO		28	NO		12	7	NO	NA	0	NA	0	NA	No	M0	N0	T2	6171	NO	TUMOR FREE	NO	2	YES		NO
TCGA-CM-6163-01A	74	89.77.0	Nationwide Children's Hospital	TCGA-CM-6163-F21455	171e5a53-3c04-4ea6-9c9a-10ee6867b0f8	TCGA-CM-6163	NO		NA	YES		22	13	0	D7D070DC-733F-4F42-A355-7814B3C3856F	Scheduled Follow-up Submission		NO	No	YES	NO	NA		NO		23	NO		12	2	NO	NA	0	NA	0	NA	No	M0	N0	T1	6163	YES	TUMOR FREE	NO	8.8	YES		NO
TCGA-AZ-6598-01A	77	123.74.0	Nationwide Children's Hospital	TCGA-AZ-6598-F34145	F3C4F561-2E93-4C4A-9ED1-26FA330668D6	TCGA-AZ-6598			NA			22	31	0	28158B57-A9F3-4E10-AC6A-C0DDBE71347F	Scheduled Follow-up Submission	Complete Remission/Response		No	YES		NA			NO	24	NO		12	7		NA	NA	NA	0	NA	No	MX	N0	T3	6598	NO	TUMOR FREE	NO	7.5	YES	Complete Remission/Response	NO
TCGA-AA-A00W-01A	80	30.80.0	Nationwide Children's Hospital	TCGA-AA-A00W-F37313	6C202792-4958-4348-856D-ED281CC43A63	TCGA-AA-A00W	NO		NA			22	1	0	F14DD154-DE04-4124-A4DF-DA8FB2B93AAB	Scheduled Follow-up Submission	Partial Remission/Response	YES	No	YES	NO	NA		NO	NO	17	NO		12	12		NA	1	NA	0	NA	No	M0	N0	T1	A00W		TUMOR FREE	NO	1.22	YES	Partial Remission/Response	NO
TCGA-DM-A0XF-01A	68	132.71.0	Nationwide Children's Hospital	TCGA-DM-A0XF-F17209	3D64F934-0A2F-4F67-8614-554332DF8ED6	TCGA-DM-A0XF	NO		NA			22	25	0	BDFF2A33-3AF7-48F3-AB70-533E6289A219	Scheduled Follow-up Submission		NO	No	YES	YES	13	YES			22	NO	NO	12	10		0	0	6	4	NA	No	M0	N2	T3	A0XF				NA	YES
TCGA-DM-A28G-01A	75	154.69.0	Nationwide Children's Hospital	TCGA-DM-A28G-F19069	180A5BE8-4D27-4BD3-931D-FD1D3F63D3EB	TCGA-DM-A28G	YES	Normal	NA	YES		22	2	0	746DD828-BCEE-4351-A7DB-6B2604DA4BFD	Scheduled Follow-up Submission		NO	No	YES	YES	NA	NO			25	NO	NO	12	12		0	1	6	0	NA	No	M0	N0	T3	A28G				NA	YES
TCGA-AA-A01F-01A	72	30.80.0	Nationwide Children's Hospital	TCGA-AA-A01F-F37303	72C00353-3FBC-46E8-A778-98182FB4F3B0	TCGA-AA-A01F	NO		NA			22	1	0	F40364C5-18E4-4327-8E8B-D6F96A388E4D	Scheduled Follow-up Submission		YES	No	YES	NO	NA		NO	NO	30	YES		12	12		NA	0	NA	2	NA	No	M0	N1	T3	A01F			YES	NA	YES		NO
TCGA-AA-3681-01A	77	36.83.0	Nationwide Children's Hospital	TCGA-AA-3681-F38090	4422CB61-6976-46C1-A681-DBC2C2541401	TCGA-AA-3681	NO		NA			22	10	0	52275E87-50A9-4AF8-986D-2B561713AD67	Scheduled Follow-up Submission	Complete Remission/Response	YES	No	YES	NO	NA		NO	NO	16	NO		12	12		NA	0	NA	2	NA	No	M0	N1	T3	3681		TUMOR FREE	NO	2.36	YES	Complete Remission/Response	NO
TCGA-AA-3489-01A	75	138.78.0	Nationwide Children's Hospital	TCGA-AA-3489-F37296	7AEABA35-8CEC-4929-B387-91118928317D	TCGA-AA-3489	NO		NA			22	1	0	EEAAD985-95B1-479F-9241-35F376199B4D	Scheduled Follow-up Submission		NO	No	YES	NO	NA		NO	NO	28			12	12		NA	0	NA	0	NA	No	M0	N0	T3	3489			NO	1.7	YES		NO
TCGA-AA-3841-01A	66	36.83.0	Nationwide Children's Hospital	TCGA-AA-3841-F38116	6F563EF6-A97C-4E05-851D-589DD30A013F	TCGA-AA-3841	NO		NA			22	10	0	B6F89671-A0A6-4F07-83DE-DBD8ECF9D5E0	Scheduled Follow-up Submission	Complete Remission/Response	YES	No	YES	NO	NA		NO	NO	24	YES		12	12		NA	0	NA	0	NA	No	M0	N0	T3	3841		TUMOR FREE	YES	NA	YES	Complete Remission/Response	NO
TCGA-AM-5820-01A	59	89.77.0	Nationwide Children's Hospital	TCGA-AM-5820-F68939	DBDE9F25-9F07-4909-9ABD-D9A05A0A7972	TCGA-AM-5820	NO		NA	NO		22	24	0	D1343AA4-34D5-4DCB-B0B3-A8EC63E0D8B7	Scheduled Follow-up Submission		NO	No	YES	NO	NA		NO	YES	4	YES	NO	12	8	NO	NA	0	NA	4	NA	No	M1	N2	T4a	5820	NO			176.1	YES
TCGA-AZ-6608-01A	55	138.78.0	Nationwide Children's Hospital	TCGA-AZ-6608-F34186	5D17EE3B-FD93-4381-9AA0-A0254630B49C	TCGA-AZ-6608			NA			22	1	0	5094A245-2589-45E1-80DB-F06CCE3B91F6	Scheduled Follow-up Submission	Progressive Disease		No	YES		NA			NO	12	YES		12	8		NA	NA	NA	2	NA	Yes	M0	N1	T2	6608	NO		NO	3.7	YES	Progressive Disease	NO
TCGA-AA-3555-01A	81	28.86.0	Nationwide Children's Hospital	TCGA-AA-3555-F37511	ECE7F482-8211-4DFE-9245-B21423990D1D	TCGA-AA-3555	NO		NA			22	3	0	1A98583A-AF72-407E-AC8E-6B8A5220E9C0	Scheduled Follow-up Submission	Complete Remission/Response	YES	No	YES	NO	NA		NO	NO	26	NO		12	12		NA	0	NA	0	NA	No	M0	N0	T3	3555		TUMOR FREE	NO	NA	YES	Complete Remission/Response	NO
TCGA-DM-A0XD-01A	65	132.71.0	Nationwide Children's Hospital	TCGA-DM-A0XD-F17622	0C38327D-43E6-4718-A528-278EDEE9B6F7	TCGA-DM-A0XD	YES	Normal	NA	YES		22	25	0	336DEC69-C97B-4290-B24C-421A8AD1F76D	Additional New Tumor Event		NO	No	YES	YES	13	YES			11	NO	NO	12	10		0	0	5	0	NA	No	M0	N0	T3	A0XD				NA	YES
TCGA-CA-5255-01A	45	138.78.0	Nationwide Children's Hospital	TCGA-CA-5255-F20294	fe0c2965-c0e3-4fff-ae77-bb2cb4cdf1f6	TCGA-CA-5255			NA			22	9	0	D4BD4336-0FF3-421C-8DCF-5E29DC3C31D7				No	YES		NA				NA			12	1		NA	NA	NA	NA	NA	No	M0	N0	T3	5255		TUMOR FREE	NO	NA	NO		YES
TCGA-AA-3939-01A	83	41.78.0	Nationwide Children's Hospital	TCGA-AA-3939-F37984	F8DCB4DC-6DEA-4AAB-98C0-336DB5B0DD20	TCGA-AA-3939	NO		NA			22	8	0	477CEDB4-F1A1-485A-B63E-E531288F1A18	Scheduled Follow-up Submission		YES	No	YES	NO	NA		NO	NO	40	NO		12	12		NA	0	NA	0	NA	Yes	M0	N0	T3	3939			NO	NA	YES		NO
TCGA-AA-3814-01A	85	36.83.0	Nationwide Children's Hospital			TCGA-AA-3814	NO		NA			22	NA	0	1C6035D9-7325-482F-9CAB-2DED1CF4BCB8			NO	No	YES	NO	NA		NO		23	YES		12	NA		NA	0	NA	0	NA	Yes	M0	N0	T3	3814				4.03	YES
TCGA-DM-A28M-01A	63	154.69.0	Nationwide Children's Hospital	TCGA-DM-A28M-F19071	B74CE1D8-BCCC-4AC6-B29C-A151BD6F07DE	TCGA-DM-A28M	YES	Normal	NA			22	5	0	8C4222FC-CDED-41B9-BB7D-CF57962B3995	Scheduled Follow-up Submission		NO	No	YES	YES	12	YES			13	NO	NO	12	12		0	0	7	0	NA	No	M0	N0	T3	A28M				NA	YES
TCGA-D5-7000-01A	79	157.71.0	Nationwide Children's Hospital	TCGA-D5-7000-F29705	7497b543-0ff3-4c35-bd9a-d62033faad7a	TCGA-D5-7000	NO		30	NO		22	28	0	8F539266-F5BC-4739-8CC0-808410383C96	Scheduled Follow-up Submission		NO	No	YES	NO	NA				14	NO	NO	12	3	NO	NA	0	NA	0	NA	No	M0	N0	T2	7000	NO	TUMOR FREE	NO	2.4	YES		NO
TCGA-CM-4747-01A	47	76.78.0	Nationwide Children's Hospital	TCGA-CM-4747-F5355	e121c355-89bf-4272-9209-0956fc04b7cb	TCGA-CM-4747	NO		NA	YES		22	23	0	A376D2F4-3963-484A-AF86-CD01FEAE73B2			YES	No	YES	NO	NA		YES		29	YES		12	12	YES	NA	0	NA	2	NA	No	M1a	N1b	T4a	4747	YES	TUMOR FREE	YES	2.6	YES		NO
TCGA-AA-3819-01A	41	36.83.0	Nationwide Children's Hospital	TCGA-AA-3819-F38111	CF3D0041-586F-4810-861E-51CE0B3324D3	TCGA-AA-3819	NO		NA			22	10	0	4665E0FB-3BA5-4525-8A03-E743C34FDD6D	Scheduled Follow-up Submission	Complete Remission/Response	NO	No	YES	NO	NA		NO	NO	14	YES		12	12		NA	0	NA	0	NA	No	M0	N0	T3	3819		TUMOR FREE	NO	1.28	YES	Complete Remission/Response	NO
TCGA-AA-3514-01A	81	28.86.0	Nationwide Children's Hospital	TCGA-AA-3514-F37285	3CC56A86-697C-47BB-AD11-765EDCDB8456	TCGA-AA-3514	NO		NA			22	1	0	C655A642-77CD-471F-B965-9BA9E0ED1688	Scheduled Follow-up Submission		YES	No	YES	NO	NA		NO	NO	12	NO		12	12		NA	0	NA	0	NA	No	M0	N0	T2	3514		TUMOR FREE	NO	2.3	YES		NO
TCGA-4T-AA8H-01A	42	422.38.0	Nationwide Children's Hospital	TCGA-4T-AA8H-F67481	DF27B7FC-56DB-44B7-82B0-390D2C837EDE	TCGA-4T-AA8H	NO		20	NO		22	5	0	C6A066DD-3776-47D6-90F9-3FC786A7A657	Scheduled Follow-up Submission	Complete Remission/Response	NO	No	YES	NO	NA		YES	NO	24	NO	NO	12	11	NO	NA	0	NA	0	NA	No	MX	N0	T3	AA8H	NO	TUMOR FREE	NO	NA	YES	Complete Remission/Response	NO
TCGA-AA-A02R-01A	84	33.79.0	Nationwide Children's Hospital			TCGA-AA-A02R	NO		NA			22	NA	0	2294FBD4-A7AF-410A-A352-3EC5B3BFE402			NO	No	YES	NO	NA		NO		18	YES		12	NA		NA	0	NA	0	NA	No	M0	N0	T3	A02R				2.67	YES
TCGA-D5-5538-01A	60	89.77.0	Nationwide Children's Hospital	TCGA-D5-5538-F13827	b0e0994a-d81f-4ead-be64-788e2950a919	TCGA-D5-5538	NO		50	NO		22	20	0	DE93FF37-7BEF-4B16-9360-05A90EE8925A	Scheduled Follow-up Submission		NO	No	YES	NO	NA		NO		6	NO		12	6	NO	NA	0	NA	3	NA	No	M0	N1b	T3	5538	NO	TUMOR FREE	YES	4.11	YES		NO
TCGA-CM-5860-01A	44	89.77.0	Nationwide Children's Hospital	TCGA-CM-5860-F13743	be6ac22e-1f98-4e2f-a427-ceae1d08a80b	TCGA-CM-5860	NO		NA	NO		22	11	0	DB4A70F7-DCA6-4C7F-B9B6-24121F5E427C	Scheduled Follow-up Submission		NO	No	YES	NO	NA		NO		44	NO		12	7	NO	NA	0	NA	0	NA	No	M0	N0	T3	5860	YES	TUMOR FREE	YES	3	YES		NO
TCGA-AA-3979-01A	84	41.78.0	Nationwide Children's Hospital	TCGA-AA-3979-F37940	626714A4-4E90-4BAD-8039-117AC1D46D3C	TCGA-AA-3979	NO		NA			22	6	0	126013D5-6769-4ED5-96A3-45DD08EA9E26	Scheduled Follow-up Submission	Complete Remission/Response	NO	No	YES	NO	NA		NO	NO	22	NO		12	12		NA	0	NA	0	NA	Yes	M0	N0	T3	3979		TUMOR FREE	NO	NA	YES	Complete Remission/Response	NO
TCGA-DM-A0X9-01A	71	132.71.0	Nationwide Children's Hospital	TCGA-DM-A0X9-F17075	B8FB36F5-52B5-4E84-96B4-07ADC17A8D51	TCGA-DM-A0X9	YES	Normal	NA	YES		22	25	0	8FC076F9-90C8-4126-ADDB-C88B7FB07490	Scheduled Follow-up Submission		NO	No	YES	YES	12	YES			16	NO	NO	12	10		0	0	7	0	NA	No	M0	N0	T3	A0X9				NA	YES
TCGA-AA-3855-01A	72	41.78.0	Nationwide Children's Hospital	TCGA-AA-3855-F38000	2E5E8D2E-24B6-496F-A860-87A0CA7AD72E	TCGA-AA-3855	NO		NA			22	8	0	0D998AB2-DFA4-41DE-93E7-784D1A85A053	Scheduled Follow-up Submission		YES	No	YES	NO	NA		NO	NO	36	YES		12	12		NA	0	NA	0	NA	No	M0	N0	T2	3855			NO	NA	YES		NO
TCGA-F4-6805-01A	58	138.78.0	Nationwide Children's Hospital	TCGA-F4-6805-F35056	74EBEFE4-9028-4BA3-8CDC-30436A9A59CD	TCGA-F4-6805	NO		NA	NO		22	14	0	1D22C0F1-C915-412D-81F5-2DA0E1D766AC	Scheduled Follow-up Submission	Complete Remission/Response	NO	No	YES	NO	NA		NO	NO	NA	NO		12	9	NO	NA	NA	NA	NA	NA	No	M0	N0	T3	6805	NO	TUMOR FREE	YES	NA	NO	Complete Remission/Response	NO
TCGA-NH-A6GA-01A	58	385.43.0	Nationwide Children's Hospital	TCGA-NH-A6GA-F64783	F615DBA7-6A47-49BC-80E0-456FC6B54725	TCGA-NH-A6GA	NO		50	NO		22	11	0	18074522-DA50-42CF-AF4E-1E4C0270DECB	Scheduled Follow-up Submission	Progressive Disease		No	YES	YES	12	YES		NO	33	YES	NO	12	9	YES	NA	0	NA	4	NA	No	MX	N2a	T4a	A6GA	NO	WITH TUMOR	YES	NA	YES	Progressive Disease	NO
TCGA-D5-6529-01A	69	123.74.0	Nationwide Children's Hospital	TCGA-D5-6529-F28928	e5a41cd8-0a19-47b5-821d-d6db0345375e	TCGA-D5-6529	NO		50	NO		22	2	0	46E1A416-EE5F-4B2A-BB6C-A2797E5478B4	Scheduled Follow-up Submission			No	YES	NO	NA				19	NO		12	3	NO	NA	0	NA	0	NA	No	M0	N0	T3	6529	YES	WITH TUMOR	NO	8.4	YES		NO
TCGA-D5-6922-01A	76	157.71.0	Nationwide Children's Hospital	TCGA-D5-6922-F29859	66bc8d5c-ee7d-4545-9bf9-06e36badd434	TCGA-D5-6922	NO		NA	NO		22	30	0	7D5FCD3F-97D3-48EA-935F-6BD0D06D1D97	Scheduled Follow-up Submission		NO	No	YES	NO	NA		NO		8	YES		12	3	NO	NA	0	NA	1	NA	No	M0	N1	T3	6922	NO	TUMOR FREE	NO	4.3	YES		NO
TCGA-CA-5256-01A	54	76.78.0	Nationwide Children's Hospital	TCGA-CA-5256-F20284	72a4c2f9-52a8-49c8-835e-8357415506f3	TCGA-CA-5256	NO		NA			22	9	0	EACB1933-11BE-482A-921E-411994A0088A			NO	No	YES	NO	NA		NO		NA			12	1	NO	NA	0	NA	NA	NA	No	M0	N0	T3	5256		TUMOR FREE	NO	NA	NO		NO
TCGA-AA-3685-01A	69	36.83.0	Nationwide Children's Hospital	TCGA-AA-3685-F38092	556272C5-235F-451D-B5C3-DAEFE899DBF7	TCGA-AA-3685	NO		NA			22	10	0	98566325-C3BB-4ED3-8B0D-815A8B35898B	Scheduled Follow-up Submission	Complete Remission/Response	YES	No	YES	NO	NA		NO	NO	24	YES		12	12		NA	0	NA	0	NA	No	M0	N0	T3	3685		TUMOR FREE	NO	8.76	YES	Complete Remission/Response	NO
TCGA-AA-3495-01A	79	76.78.0	Nationwide Children's Hospital	TCGA-AA-3495-F37274	3F0F1A83-DE10-469B-BEBE-E923D79110CE	TCGA-AA-3495	NO		NA			22	1	0	6EE6466D-AFE6-457C-9A72-4EBC9CF75B5F	Scheduled Follow-up Submission	Complete Remission/Response	YES	No	YES	NO	NA		NO	NO	18			12	12		NA	0	NA	0	NA	No	M0	N0	T2	3495		TUMOR FREE	NO	1.9	YES	Complete Remission/Response	NO
TCGA-5M-AAT4-01A	74	422.38.0	Nationwide Children's Hospital	TCGA-5M-AAT4-F70103	5FB76E81-1057-4EA8-A938-3DD73EEBC1A9	TCGA-5M-AAT4	NO		NA	YES		22	27	0	6E78DA6B-E0F4-4E36-BA82-9F1FAA42C54C		Progressive Disease	NO	No	YES	NO	NA		NO	NO	3			12	1	NO	NA	0	NA	0	0	No	M1b	N0	T3	AAT4		WITH TUMOR	NO	550	YES	Progressive Disease	NO
TCGA-A6-5665-01A	84	89.77.0	Nationwide Children's Hospital	TCGA-A6-5665-F17987	3a84dc0c-15e9-4b82-a2b7-32fb24c0c855	TCGA-A6-5665	YES	Abnormal	NA	YES		22	1	0	83168171-7625-41CA-AD3D-40ABFED2282D			NO	No	YES	NO	NA		YES		25	YES	YES	12	11	NO	5	0	5	0	NA	No	M0	N0	T3	5665		TUMOR FREE	NO	19	YES		NO
TCGA-A6-5665-01B	84	89.77.0	Nationwide Children's Hospital	TCGA-A6-5665-F17987	3a84dc0c-15e9-4b82-a2b7-32fb24c0c855	TCGA-A6-5665	YES	Abnormal	NA	YES		22	1	0	83168171-7625-41CA-AD3D-40ABFED2282D			NO	No	YES	NO	NA		YES		25	YES	YES	12	11	NO	5	0	5	0	NA	No	M0	N0	T3	5665		TUMOR FREE	NO	19	YES		NO
TCGA-CM-6675-01A	35	138.78.0	Nationwide Children's Hospital	TCGA-CM-6675-F15643	642025af-0945-40ef-a43d-443ce90faa16	TCGA-CM-6675	NO		NA	NO		22	NA	0	CDF8ECDC-B428-442E-8AD0-F4C0DCFFA6AA	Scheduled Follow-up Submission		NO	No	YES	NO	NA		YES		72	NO		12	8	YES	NA	0	NA	12	NA	No	M1b	N2b	T3	6675	YES	TUMOR FREE	YES	2	YES		NO
TCGA-AA-3510-01A	70	76.78.0	Nationwide Children's Hospital	TCGA-AA-3510-F37281	2CD258E2-1FA2-4226-8A41-8B85515B3DC7	TCGA-AA-3510	NO		NA			22	1	0	C4E07884-3541-4754-945B-E14F06160613	Scheduled Follow-up Submission	Complete Remission/Response	YES	No	YES	NO	NA		NO	NO	44	NO		12	12		NA	0	NA	0	NA	No	M0	N0	T3	3510		TUMOR FREE	NO	3.59	YES	Complete Remission/Response	NO
TCGA-AA-3554-01A	62	29.82.0	Nationwide Children's Hospital	TCGA-AA-3554-F37510	70EC0EFB-FA28-40CD-B9AD-8CAC20E2CF16	TCGA-AA-3554	NO		NA			22	3	0	F11FE695-7134-405D-9D54-7368FCFBF9AF	Scheduled Follow-up Submission	Complete Remission/Response	YES	Yes	YES	NO	NA		NO	NO	39	NO		12	12		NA	3	NA	0	NA	Yes	M0	N0	T3	3554		TUMOR FREE	NO	NA	YES	Complete Remission/Response	NO
TCGA-D5-6536-01A	73	116.77.0	Nationwide Children's Hospital	TCGA-D5-6536-F28925	041460eb-afaa-4b47-a417-48b06dddf2f9	TCGA-D5-6536	NO		11	NO		22	2	0	82C390E9-892B-4337-8A1D-21AD903A01C6	Scheduled Follow-up Submission			No	YES	NO	NA				14	NO		12	3	NO	NA	NA	NA	0	NA	No	M0	N0	T3	6536	YES	WITH TUMOR	NO	NA	YES		NO
TCGA-AA-3866-01A	78	41.78.0	Nationwide Children's Hospital	TCGA-AA-3866-F37991	F8289B38-8527-4BFE-B8DA-DFA5044814BE	TCGA-AA-3866	NO		NA			22	8	0	788A4C1A-1133-4E55-9C07-E9DD3782C87D	Scheduled Follow-up Submission	Complete Remission/Response	NO	No	YES	NO	NA		NO	NO	23	NO		12	12		NA	0	NA	0	NA	No	M0	N0	T2	3866		TUMOR FREE	NO	11.36	YES	Complete Remission/Response	NO
TCGA-A6-6142-01A	56	123.74.0	Nationwide Children's Hospital	TCGA-A6-6142-F28725	03276653-4e71-4c56-8f41-e41b60422ae7	TCGA-A6-6142	NO		NA	NO		22	28	0	3D50313A-AF32-4AFE-A5F8-A11D0792B7F0				No	YES	YES	NA	NO	YES		37	YES	NO	12	2	NO	0	1	5	1	NA	No	M1a	N1a	T3	6142		TUMOR FREE	YES	5.4	YES		NO
TCGA-AA-3952-01A	68	41.78.0	Nationwide Children's Hospital			TCGA-AA-3952	NO		NA			22	NA	0	DA0B2228-AF2A-4EC1-9520-7BEBCBD78C72			YES	No	YES	NO	NA		NO		14	YES		12	NA		NA	0	NA	6	NA	Yes	M0	N2	T3	3952				NA	YES
TCGA-AA-3875-01A	78	36.83.0	Nationwide Children's Hospital	TCGA-AA-3875-F37987	6838AD54-9C45-43AE-AF67-65EDBAAB6436	TCGA-AA-3875	NO		NA			22	8	0	6E062E63-DF76-4A1D-9F2B-828FDAD8672D	Scheduled Follow-up Submission		NO	No	YES	NO	NA		NO	NO	31	NO		12	12		NA	0	NA	0	NA	No	M0	N0	T1	3875			NO	0.87	YES		NO
TCGA-CM-6680-01A	78	138.78.0	Nationwide Children's Hospital	TCGA-CM-6680-F15662	9856b08b-2641-4f63-be5b-59945123fb24	TCGA-CM-6680	NO		NA	NO		22	NA	0	D9E7C027-6CDD-438F-9392-72061992FFF2	Scheduled Follow-up Submission		NO	No	YES	NO	NA		NO		17	NO		12	8	NO	NA	0	NA	4	NA	No	M0	N2a	T3	6680	NO	TUMOR FREE	NO	1.4	YES		NO
TCGA-A6-4105-01A	79	123.74.0	Nationwide Children's Hospital	TCGA-A6-4105-F13353	955d7416-0751-4214-bf0e-66d3b0afd770	TCGA-A6-4105	NO		NA	YES		22	24	0	2516E9FE-D51A-4DFA-872F-1E07DD43F075			NO	No	YES	NO	NA		NO		19	NO	NO	12	6	NO	0	0	5	0	NA	Yes	M0	N0	T3	4105		TUMOR FREE	NO	NA	YES		NO
TCGA-AA-A01Z-01A	68	66.81.0	Nationwide Children's Hospital	TCGA-AA-A01Z-F37290	B46558D6-D06C-417E-AC84-0B7110CA1C36	TCGA-AA-A01Z	NO		NA			22	1	0	104D4CFE-2914-4882-A3F1-C35D02C56713	Scheduled Follow-up Submission	Progressive Disease	YES	No	YES	NO	NA		NO	NO	12	YES		12	12		NA	0	NA	0	NA	No	M0	N0	T3	A01Z		WITH TUMOR	NO	18.87	YES	Progressive Disease	NO
TCGA-AZ-6607-01A	69	138.78.0	Nationwide Children's Hospital	TCGA-AZ-6607-F34176	03947DF6-B8A3-4B22-8555-47DA919E0892	TCGA-AZ-6607			NA			22	1	0	0BB75FF7-41E2-4072-91EA-1B5EBDF99F45	Scheduled Follow-up Submission	Progressive Disease		No	YES		NA			NO	19	YES		12	8		NA	NA	NA	5	NA	No	M1	N2	T4	6607	YES	WITH TUMOR	NO	22.6	NO	Complete Remission/Response	NO
TCGA-AA-3675-01A	84	36.83.0	Nationwide Children's Hospital	TCGA-AA-3675-F37525	E7A3BDC3-0A78-4B76-BFB8-8D232FDA6861	TCGA-AA-3675	NO		NA			22	3	0	3AC24858-BD7E-4F43-A2DD-638C75DB538F	Scheduled Follow-up Submission	Complete Remission/Response	YES	No	YES	NO	NA		NO	NO	24	NO		12	12		NA	0	NA	0	NA	No	M0	N0	T3	3675		TUMOR FREE	NO	5.06	YES	Complete Remission/Response	NO
TCGA-AA-A02J-01A	70	33.79.0	Nationwide Children's Hospital			TCGA-AA-A02J	NO		NA			22	NA	0	9AD340D5-51B7-420C-94B0-E2326C069879			NO	No	YES	NO	NA		NO		13	YES		12	NA		NA	1	NA	0	NA	No	M1	N0	T3	A02J				96.57	YES
TCGA-G4-6298-01A	90	116.77.0	Nationwide Children's Hospital	TCGA-G4-6298-F21899	f60f0d08-60bd-4515-aa39-c364b1163c69	TCGA-G4-6298	NO		NA	NO		22	20	0	BD84EEFC-4534-4F85-B33F-2508930C36CC	Scheduled Follow-up Submission		NO	No	YES	NO	NA		NO		37	NO		12	1	NO	NA	0	NA	1	NA	Yes	MX	N1	T4a	6298	YES	WITH TUMOR	NO	NA	YES		NO
TCGA-AA-A01T-01A	63	66.81.0	Nationwide Children's Hospital	TCGA-AA-A01T-F37292	789DD55E-9B97-45A5-A8B1-0A62864EA7A5	TCGA-AA-A01T	NO		NA			22	1	0	6A1F1F6A-A952-4360-A960-AA9D74182934	Scheduled Follow-up Submission	Complete Remission/Response	NO	No	YES	NO	NA		NO	NO	15	YES		12	12		NA	0	NA	1	NA	No	M0	N1	T3	A01T		TUMOR FREE	YES	0.7	YES	Complete Remission/Response	NO
TCGA-G4-6309-01A	40	138.78.0	Nationwide Children's Hospital	TCGA-G4-6309-F21946	f271a489-f64b-4e61-8b65-af850ac0e6d4	TCGA-G4-6309	NO		NA	YES		22	7	0	A98346E2-2DB9-4812-BB18-8E321BF5E137	Scheduled Follow-up Submission		NO	No	YES	NO	NA		YES		24	NO	YES	12	1	NO	NA	0	NA	2	NA	No	M0	N1	T3	6309	NO	TUMOR FREE	YES	NA	YES		NO
TCGA-CM-6679-01A	58	138.78.0	Nationwide Children's Hospital	TCGA-CM-6679-F15660	2eb0032a-48ae-4ccc-8f4c-88beaec88e8e	TCGA-CM-6679	NO		40	NO		22	NA	0	DA87AD06-28FA-42B1-92EA-FAEF8F6F5E9B	Scheduled Follow-up Submission		NO	No	YES	NO	NA		YES		21	NO		12	8	NO	NA	0	NA	0	NA	No	M0	N0	T3	6679	NO	TUMOR FREE	NO	2.3	YES		NO
TCGA-AA-A03J-01A	65	66.81.0	Nationwide Children's Hospital	TCGA-AA-A03J-F37276	F597B718-AC8A-4AA1-86B3-94AEF446F5E6	TCGA-AA-A03J	NO		NA			22	1	0	CC972687-DE87-4D55-B85C-7C3B8D9F50D2	Scheduled Follow-up Submission	Complete Remission/Response	YES	No	YES	NO	NA		NO	NO	34			12	12		NA	1	NA	0	NA	No	M0	N0	T2	A03J		TUMOR FREE	NO	2.09	YES	Complete Remission/Response	NO
TCGA-CA-6717-01A	57	138.78.0	Nationwide Children's Hospital	TCGA-CA-6717-F70858	4BDF04E5-1D50-46E2-AFD6-5D1CC319CA79	TCGA-CA-6717			NA			22	10	0	277555DA-461D-4C8E-BE73-475382FD0EAF	Scheduled Follow-up Submission	Complete Remission/Response		No	YES		NA			NO	NA			12	3		NA	NA	NA	NA	NA	No	M0	N0	T3	6717		TUMOR FREE	YES	NA	NO	Complete Remission/Response	NO
TCGA-CK-6751-01A	88	138.78.0	Nationwide Children's Hospital	TCGA-CK-6751-F14758	bd6e9673-e145-4c90-9fd5-3c2a1d9854c4	TCGA-CK-6751	NO		NA	NO		22	NA	0	2986C44E-1CF1-48FD-8734-B3A197178B6C			NO	No	YES	NO	NA				NA	NO		12	8	NO	NA	NA	NA	NA	NA	No	MX	N0	T2	6751	NO	TUMOR FREE	NO	1.3			NO
TCGA-QL-A97D-01A	84	422.38.0	Nationwide Children's Hospital	TCGA-QL-A97D-F66328	571D720E-E5C4-4E8F-BA2D-4E9120DE296F	TCGA-QL-A97D			NA			22	29	0	A8E83A33-526D-4D42-BF04-15E67B7B59A0		Complete Remission/Response		No	YES		NA			NO	13			12	10		NA	NA	NA	0	NA	No	MX	N0	T2	A97D		TUMOR FREE	NO	NA	YES	Complete Remission/Response	NO
TCGA-CM-6161-01A	36	89.77.0	Nationwide Children's Hospital	TCGA-CM-6161-F13924	1eb08eb8-f4a0-40d8-94e8-a98dea862c25	TCGA-CM-6161	NO		NA	YES		22	19	0	C182B499-A7E3-4447-9639-A65EC2CBBA99	Scheduled Follow-up Submission		NO	No	YES	NO	NA		YES		31	NO	NO	12	7	NO	0	0	5	0	NA	No	M0	N0	T2	6161	NO	TUMOR FREE	NO	0.4	YES		NO
TCGA-AA-3850-01A	74	41.78.0	Nationwide Children's Hospital			TCGA-AA-3850	NO		NA			22	NA	0	F8911E1C-D70D-403B-97DA-08686C5E58CD			YES	No	YES	NO	NA		NO		15	YES		12	NA		NA	0	NA	0	NA	No	M0	N0	T2	3850				NA	YES
TCGA-AA-3666-01A	68	36.83.0	Nationwide Children's Hospital			TCGA-AA-3666	NO		NA			22	NA	0	E3C4A6B9-EC4B-4E86-89CD-EDA46673C57A			NO	No	YES	NO	NA		NO		41	NO		12	NA		NA	0	NA	2	NA	No	M0	N1	T3	3666				41.6	YES
TCGA-AA-3488-01A	58	76.78.0	Nationwide Children's Hospital			TCGA-AA-3488	NO		NA			22	NA	0	883E6C01-9DDF-4271-B644-4212B3EFD08E			NO	No	YES	NO	NA		NO		26			12	NA		NA	0	NA	15	NA	No	M1	N2	T3	3488				NA	YES
TCGA-A6-5666-01A	78	89.77.0	Nationwide Children's Hospital	TCGA-A6-5666-F12341	16213052-c10a-4309-be05-0e4f3238b6d9	TCGA-A6-5666	NO		NA	NO		22	27	0	39DDE795-BCE5-4684-8774-FC4EFC7C210A			NO	No	YES	NO	NA		NO		30	NO		12	5	YES	NA	0	NA	0	NA	No	M0	N0	T4b	5666		TUMOR FREE	NO	3.5	YES		NO
TCGA-AA-A02K-01A	50	66.81.0	Nationwide Children's Hospital	TCGA-AA-A02K-F37283	0705ED4D-DC6A-4AAD-9525-E2EEA03A47D7	TCGA-AA-A02K	NO		NA			22	1	0	98AB0334-BA81-42E6-83E6-056316A2B08A	Scheduled Follow-up Submission	Progressive Disease	NO	No	YES	NO	NA		NO	NO	20	YES		12	12		NA	1	NA	7	NA	No	M1	N2	T4	A02K		WITH TUMOR	YES	NA	YES	Progressive Disease	NO
TCGA-5M-AATE-01A	76	422.38.0	Nationwide Children's Hospital	TCGA-5M-AATE-F70110	AB186DC8-D4BE-474C-9EEC-3C380DF9C952	TCGA-5M-AATE	NO		NA	NO		22	27	0	5F49CFDF-3B6D-4D3C-B54B-27EC625F13FE	Scheduled Follow-up Submission	Partial Remission/Response	NO	No	YES	YES	NA	YES	NO	NO	15	NO		12	1	NO	NA	0	NA	0	0	No	M0	N0	T3	AATE	NO	WITH TUMOR	NO	2.91	YES	Progressive Disease	NO
TCGA-CM-6168-01A	84	89.77.0	Nationwide Children's Hospital	TCGA-CM-6168-F13990	e9f47721-0016-4d88-885a-0b1c9ef49014	TCGA-CM-6168	NO		NA	NO		22	19	0	37D76764-AAE7-4E97-844A-E15EBE344CDD	Scheduled Follow-up Submission		NO	No	YES	NO	NA		NO		31	NO		12	7	NO	NA	0	NA	0	NA	No	M0	N0	T3	6168	NO	TUMOR FREE	NO	7.8	YES		NO
TCGA-A6-2686-01A	81	76.78.0	Nationwide Children's Hospital	TCGA-A6-2686-F5721	2018bb65-adee-4393-b81b-62fab11c2bcb	TCGA-A6-2686	NO		NA	NO		22	19	0	44D20932-DBC1-472B-B762-1A67A191AAE4			NO	No	YES	NO	NA				33	NO		12	1	NO	NA	0	NA	0	NA	No	M0	N0	T3	2686		TUMOR FREE	NO	2.2	YES		NO
TCGA-AA-3861-01A	72	41.78.0	Nationwide Children's Hospital	TCGA-AA-3861-F37996	72BF7711-DBDA-4FF2-9FE2-43BB072B5E0F	TCGA-AA-3861	NO		NA			22	8	0	438BAE56-D341-421E-BDD1-49F5BE25068B	Scheduled Follow-up Submission	Complete Remission/Response	NO	No	YES	NO	NA		NO	NO	17	YES		12	12		NA	0	NA	0	NA	No	M0	N0	T3	3861		TUMOR FREE	NO	NA	YES	Complete Remission/Response	NO
TCGA-CK-6747-01A	87	138.78.0	Nationwide Children's Hospital	TCGA-CK-6747-F14825	e2810946-304a-4ae0-b2f6-d635d2a87d08	TCGA-CK-6747	NO		NA	NO		22	NA	0	91FF0332-F3F5-4BC8-871C-43BA2F0DC284			NO	No	YES	NO	NA				NA	NO		12	8	NO	NA	NA	NA	NA	NA	No	MX	N0	T3	6747	NO	TUMOR FREE	NO	0.9			NO
TCGA-G4-6626-01A	90	123.74.0	Nationwide Children's Hospital	TCGA-G4-6626-F21885	4a594724-3caa-46df-8191-ee10cf41514c	TCGA-G4-6626			NA	NO		22	2	0	49CD2172-6E6C-4F94-866C-487AD47C9F49	Scheduled Follow-up Submission		NO	No	YES	NO	NA		NO		16	NO		12	2	NO	NA	0	NA	0	NA	No	M0	N0	T3	6626	NO	TUMOR FREE	NO	NA	YES		NO
TCGA-QG-A5YX-01A	61	300.56.0	Nationwide Children's Hospital	TCGA-QG-A5YX-F58610	F05B2671-9D64-40B1-B6AF-3F965F5F795B	TCGA-QG-A5YX	NO		25	YES		22	16	0	E7B3EC0C-8D28-4460-9D94-67B2A5A40E46	Scheduled Follow-up Submission	Complete Remission/Response	NO	No	YES	NO	NA		YES	NO	13	NO		12	4	NO	NA	1	NA	0	NA	No	MX	N0	T3	A5YX	NO	TUMOR FREE	YES	2.04	YES	Complete Remission/Response	NO
TCGA-AA-3977-01A	65	41.78.0	Nationwide Children's Hospital	TCGA-AA-3977-F37942	7E76868D-8DD7-462C-95F2-664196FD580D	TCGA-AA-3977	NO		NA			22	6	0	62A7A564-FF48-4C20-AFAF-9CD72B8236EB	Scheduled Follow-up Submission	Complete Remission/Response	YES	No	YES	NO	NA		NO	NO	15	NO		12	12		NA	0	NA	0	NA	No		N0	T2	3977		TUMOR FREE	NO	NA	YES	Complete Remission/Response	NO
TCGA-AA-3560-01A	72	28.86.0	Nationwide Children's Hospital	TCGA-AA-3560-F37514	4ED04A14-4E95-45D1-98E7-D07792B41B14	TCGA-AA-3560	NO		NA			22	3	0	153DADCF-0C21-44B8-BC4D-9DADEB047498	Scheduled Follow-up Submission	Complete Remission/Response	YES	No	YES	NO	NA		NO	NO	25	YES		12	12		NA	0	NA	5	NA	Yes	M0	N2	T3	3560		TUMOR FREE	YES	NA	YES	Complete Remission/Response	NO
TCGA-AA-3972-01A	72	41.78.0	Nationwide Children's Hospital	TCGA-AA-3972-F37947	1461B87D-2A34-4F25-8075-53CF6A9B9262	TCGA-AA-3972	NO		NA			22	6	0	52E54F80-AEBF-468A-A784-6FABCF251D39	Scheduled Follow-up Submission	Progressive Disease	NO	No	YES	NO	NA		NO	NO	12	NO		12	12		NA	0	NA	3	NA	Yes	M1	N1	T3	3972		WITH TUMOR	YES	5.15	YES	Progressive Disease	NO
TCGA-CK-4950-01A	68	116.77.0	Nationwide Children's Hospital	TCGA-CK-4950-F9824	033e4e32-4fc0-4574-af89-feaf7df285a9	TCGA-CK-4950	NO		25	NO		22	1	0	D435AEA6-C69C-439C-92DD-BD142307F482			NO	No	YES	NO	NA				18	NO		12	4	NO	NA	NA	NA	1	0	No	M0	N1	T3	4950	NO	TUMOR FREE	YES	NA	YES		NO
TCGA-AA-3877-01A	83	41.78.0	Nationwide Children's Hospital	TCGA-AA-3877-F37986	943CAA49-964B-4317-8CD8-C791D92B9488	TCGA-AA-3877	NO		NA			22	8	0	AD9C8500-6F79-4150-ADEB-5D56584132E2	Scheduled Follow-up Submission	Complete Remission/Response	YES	No	YES	NO	NA		NO	NO	18	NO		12	12		NA	0	NA	0	NA	No	M0	N0	T1	3877		TUMOR FREE	NO	5.6	YES	Complete Remission/Response	NO
TCGA-4N-A93T-01A	67	385.43.0	Nationwide Children's Hospital	TCGA-4N-A93T-F67783	B614BDCE-3651-4441-BA59-DDDD53D595FF	TCGA-4N-A93T	NO		30	YES		22	11	0	2C27A502-16F5-4EDD-BD90-07A25B2B8A48	Scheduled Follow-up Submission	Stable Disease	NO	No	YES	NO	NA		YES	NO	25	NO		12	11	YES	NA	0	NA	NA	2	No	M0	N1b	T4a	A93T	NO	WITH TUMOR	YES	2	YES	Stable Disease	NO
TCGA-AA-A00K-01A	79	30.80.0	Nationwide Children's Hospital	TCGA-AA-A00K-F72574	276C9D30-A166-4AEB-A63D-A499C579271A	TCGA-AA-A00K	NO		NA			22	24	0	A9F34C04-CF32-4FB5-8053-E0EA3664F6D7	Scheduled Follow-up Submission		NO	No	YES	NO	NA		NO	NO	55	NO		12	7		NA	0	NA	0	NA	No	M0	N0	T3	A00K				NA	YES
TCGA-AA-3947-01A	60	41.78.0	Nationwide Children's Hospital	TCGA-AA-3947-F37982	2F441C1E-987A-495C-8488-DF77BBA7D3BA	TCGA-AA-3947	NO		NA			22	8	0	8BB1F3EF-BE85-478F-B5BF-DC3714340F8C	Scheduled Follow-up Submission	Complete Remission/Response	YES	No	YES	NO	NA		NO	NO	22	NO		12	12		NA	0	NA	0	NA	No	M0	N0	T4	3947		TUMOR FREE	NO	NA	YES	Complete Remission/Response	NO
TCGA-CM-5864-01A	60	89.77.0	Nationwide Children's Hospital	TCGA-CM-5864-F13896	4f89053d-6874-4b69-9946-b65349b67b97	TCGA-CM-5864	NO		NA	NO		22	18	0	E7E3A524-A87F-4DBF-A2AE-B6AB8D71D1FD	Scheduled Follow-up Submission		NO	No	YES	NO	NA		YES		33	NO		12	7	NO	NA	1	NA	0	NA	No	M0	N0	T2	5864	NO	TUMOR FREE	NO	2.8	YES		NO
TCGA-DM-A1HA-01A	82	132.71.0	Nationwide Children's Hospital	TCGA-DM-A1HA-F19072	D0C8AE24-AF2B-4916-BF49-5383AC7B66FD	TCGA-DM-A1HA	YES	Normal	NA	YES		22	5	0	238B9BB0-D619-48FE-8BFF-5B435A5D9EEF	Scheduled Follow-up Submission		YES	No	YES	YES	12	YES			17		NO	12	12		0	0	5	4	NA	No	M0	N2	T3	A1HA				NA	YES
TCGA-G4-6304-01A	66	157.71.0	Nationwide Children's Hospital	TCGA-G4-6304-F21875	bd0b5c0b-747f-4aa4-936d-8b4165073514	TCGA-G4-6304	NO		NA	NO		22	6	0	F1EC1ED0-2519-4719-82B3-1957AEEE6EBF	Scheduled Follow-up Submission		NO	No	YES	NO	NA		NO		25	NO		12	2	NO	NA	0	NA	0	NA	No	M0	N0	T4	6304	NO	TUMOR FREE	YES	4.4	NO		NO
TCGA-DM-A28A-01A	78	154.69.0	Nationwide Children's Hospital	TCGA-DM-A28A-F19065	860F60C3-2E50-4686-B22F-02038CF2602E	TCGA-DM-A28A	YES	Normal	NA			22	2	0	8FB39462-B0B3-4B25-857D-7DDA12642E75	Scheduled Follow-up Submission		NO	No	YES	YES	12	YES			15	NO	NO	12	12		1	0	6	6	NA	No	M0	N2	T3	A28A				NA	YES
TCGA-AA-A01K-01A	74	33.79.0	Nationwide Children's Hospital	TCGA-AA-A01K-F37298	E5AA78A4-0BE9-43F2-93DD-3C7CE6B26EA0	TCGA-AA-A01K	NO		NA			22	1	0	4E9F13F2-4CE8-4911-B604-A01DB2D52FD7	Scheduled Follow-up Submission	Complete Remission/Response	NO	No	YES	NO	NA		NO	NO	35	YES		12	12		NA	0	NA	4	NA	No	M0	N2	T3	A01K		TUMOR FREE	YES	NA	YES	Complete Remission/Response	NO
TCGA-D5-6533-01A	68	116.77.0	Nationwide Children's Hospital	TCGA-D5-6533-F34448	F1D508A2-A881-423E-B96C-A2EF901D96FE	TCGA-D5-6533	NO		0	NO		22	15	0	ACD4F6C7-3B3E-4197-A3F0-4377C6B91481	Scheduled Follow-up Submission	Complete Remission/Response	NO	No	YES	NO	NA		NO	NO	8	NO		12	8	NO	NA	0	NA	0	NA	No	M0	N0	T4b	6533	YES		YES	228.8	YES	Complete Remission/Response	NO
TCGA-A6-2683-01A	57	28.86.0	Nationwide Children's Hospital	TCGA-A6-2683-F4958	deadb59f-d6f0-40db-a0dd-028d65d5bee4	TCGA-A6-2683	NO		NA	NO		22	18	0	86717174-ABF8-4871-876B-03858552BF1D			YES	No	YES	YES	12	YES	YES		25	NO	NO	12	10	NO	0	0	4	0	0	No	M1	N0	T4	2683		WITH TUMOR	YES	2614	YES		NO
TCGA-G4-6588-01A	58	123.74.0	Nationwide Children's Hospital	TCGA-G4-6588-F21886	5790aa3d-cbd3-4c7f-96db-e2f4dc41252e	TCGA-G4-6588	NO		NA	NO		22	31	0	EBA5BCC0-B822-485C-BC85-D56D30E8319E	Scheduled Follow-up Submission		YES	No	YES	NO	NA		YES		15	NO	YES	12	1	NO	NA	0	NA	0	NA	Yes	M0	N0	T3	6588	NO	TUMOR FREE	NO	2.8	NO		NO
TCGA-AA-3846-01A	74	41.78.0	Nationwide Children's Hospital	TCGA-AA-3846-F38006	8328B6CE-A20C-4933-94C9-70F97D45B279	TCGA-AA-3846	NO		NA			22	8	0	0B31858F-EB80-4459-AA78-F37F5BBC38BA	Scheduled Follow-up Submission		YES	No	YES	NO	NA		NO	NO	16	YES		12	12		NA	0	NA	0	NA	No	M0	N0	T3	3846			NO	NA	YES		NO
TCGA-AM-5821-01A	68	89.77.0	Nationwide Children's Hospital	TCGA-AM-5821-F68940	E2F32BB9-25C6-4409-9ABB-84EE6AD29138	TCGA-AM-5821	NO		NA			22	24	0	1C39861D-36AE-4BA6-9EDE-E257860D1850	Scheduled Follow-up Submission		YES	No	YES	NO	NA		NO	YES	NA	NO		12	8	NO	NA	0	NA	NA	NA	No	M0	N0	T3	5821	NO			NA	NO
TCGA-AA-3684-01A	65	36.83.0	Nationwide Children's Hospital			TCGA-AA-3684	NO		NA			22	NA	0	D31732BC-075B-455B-A4AB-1F517270D528			YES	No	YES	NO	NA		NO		10	YES		12	NA		NA	0	NA	9	NA	No	M1	N2	T4	3684				2.28	YES
TCGA-A6-5656-01A	74	138.78.0	Nationwide Children's Hospital	TCGA-A6-5656-F15816	c53511a6-e362-4ebe-9f2a-229ba56761af	TCGA-A6-5656	NO		NA	NO		22	1	0	D66A4BC5-FB4F-4789-9BDE-B5CB06921371			YES	No	YES	NO	NA		NO		16	NO		12	9	NO	NA	0	NA	0	NA	No	M0	N0	T2	5656		TUMOR FREE	NO	5.1	YES		NO
TCGA-A6-5656-01B	74	138.78.0	Nationwide Children's Hospital	TCGA-A6-5656-F15816	c53511a6-e362-4ebe-9f2a-229ba56761af	TCGA-A6-5656	NO		NA	NO		22	1	0	D66A4BC5-FB4F-4789-9BDE-B5CB06921371			YES	No	YES	NO	NA		NO		16	NO		12	9	NO	NA	0	NA	0	NA	No	M0	N0	T2	5656		TUMOR FREE	NO	5.1	YES		NO
TCGA-AA-A01S-01A	47	66.81.0	Nationwide Children's Hospital			TCGA-AA-A01S	NO		NA			22	NA	0	66BB3826-555C-40B4-86F2-AFA8562BDDE4			NO	No	YES	NO	NA		NO		19			12	NA		NA	0	NA	1	NA	No	M0	N1	T3	A01S				0.82	YES
TCGA-AA-3851-01A	74	41.78.0	Nationwide Children's Hospital	TCGA-AA-3851-F38003	DFC12F42-56A9-44A7-9390-F15DB394871C	TCGA-AA-3851	NO		NA			22	8	0	388C7DC4-62B7-416E-ACA9-AA10A5FC446C	Scheduled Follow-up Submission		YES	No	YES	NO	NA		NO	NO	14	YES		12	12		NA	1	NA	0	NA	No	M0	N0	T3	3851			NO	7.55	YES		NO
TCGA-AA-3971-01A	58	41.78.0	Nationwide Children's Hospital	TCGA-AA-3971-F37948	2E430C9C-D4FA-4B21-B122-BFE742F043D0	TCGA-AA-3971	NO		NA			22	6	0	A3A3756A-8A6E-4B0D-9A06-FD8199F0A094	Scheduled Follow-up Submission	Complete Remission/Response	NO	No	YES	NO	NA		NO	NO	19	NO		12	12		NA	0	NA	2	NA	No	M0	N1	T3	3971		TUMOR FREE	YES	1.48	YES	Complete Remission/Response	NO
TCGA-AA-3844-01A	78	41.78.0	Nationwide Children's Hospital	TCGA-AA-3844-F38230	C3740971-CEB9-4D61-BA5F-16B5EE9D2DAE	TCGA-AA-3844	NO		NA			22	11	0	BB8AF61E-D511-4AAC-805D-4497D51E449B	Scheduled Follow-up Submission	Progressive Disease	NO	No	YES	NO	NA		NO	NO	18	YES		12	12		NA	0	NA	7	NA	Yes	M0	N2	T3	3844		WITH TUMOR	YES	NA	YES	Progressive Disease	YES
TCGA-AA-3982-01A	75	41.78.0	Nationwide Children's Hospital	TCGA-AA-3982-F37939	6774694D-864E-4280-B673-729BDDA233E6	TCGA-AA-3982	NO		NA			22	6	0	FD08682E-9DFA-4F87-9648-2426C86816EB	Scheduled Follow-up Submission		YES	No	YES	NO	NA		NO	NO	13	YES		12	12		NA	0	NA	3	NA	No	M0	N1	T3	3982			NO	NA	YES		NO
TCGA-AA-3693-01A	77	36.83.0	Nationwide Children's Hospital			TCGA-AA-3693	NO		NA			22	NA	0	C1E341F0-448A-4CD6-91C5-C222B579319A			NO	No	YES	NO	NA		NO		17	YES		12	NA		NA	0	NA	2	NA	No	M1	N1	T4	3693				2.42	YES
TCGA-D5-6930-01A	67	157.71.0	Nationwide Children's Hospital	TCGA-D5-6930-F34404	A70E2535-70FD-4B2F-AE14-26F324CFFF29	TCGA-D5-6930	NO		40	YES		22	14	0	721FC1EB-5C97-4D8F-A642-6F1A19B6D411	Scheduled Follow-up Submission	Complete Remission/Response	NO	No	YES	NO	NA		NO	NO	20	NO		12	8	NO	NA	0	NA	0	0	No	M0	N0	T3	6930	YES		NO	3	YES		NO
TCGA-DM-A280-01A	70	154.69.0	Nationwide Children's Hospital	TCGA-DM-A280-F19061	18538D25-0C10-4219-9020-1F4B3F9E6789	TCGA-DM-A280	YES	Normal	NA	NO		22	2	0	D4C64415-5D13-4AFA-9029-060033681ACF	Scheduled Follow-up Submission		NO	No	YES	YES	12	YES			10	NO	NO	12	12		0	0	5	0	NA	No	M0	N0	T3	A280				NA	YES
TCGA-A6-4107-01A	57	76.78.0	Nationwide Children's Hospital	TCGA-A6-4107-F7149	e5557d3d-e9ec-4249-abfc-4f84d612633a	TCGA-A6-4107	NO		NA	NO		22	4	0	6A150B70-C49A-430E-B11B-C6A3E8607B8A			NO	No	YES	NO	NA		YES		28	YES	NO	12	2	NO	0	0	5	2	NA	No	M0	N1b	T3	4107		TUMOR FREE	YES	1.6	YES		NO
TCGA-AA-A022-01A	88	66.81.0	Nationwide Children's Hospital			TCGA-AA-A022	NO		NA			22	NA	0	261CE67A-71E5-4B5E-B001-DB28FE31691C			NO	No	YES	NO	NA		NO		18	YES		12	NA		NA	0	NA	0	NA	No	M0	N0	T4	A022				1.51	YES
TCGA-AA-3667-01A	36	36.83.0	Nationwide Children's Hospital	TCGA-AA-3667-F37522	502C0404-DDE0-459C-AD14-9529830F55C3	TCGA-AA-3667	NO		NA			22	3	0	5D109323-9967-4F22-BEBC-067AB5987FC3	Scheduled Follow-up Submission	Complete Remission/Response	NO	No	YES	NO	NA		NO	NO	22	NO		12	12		NA	0	NA	0	NA	No	M0	N0	T2	3667		TUMOR FREE	NO	0.45	YES	Complete Remission/Response	NO
TCGA-AA-3864-01A	71	41.78.0	Nationwide Children's Hospital	TCGA-AA-3864-F37994	3098EF39-C768-4CA8-8638-D0772354CF6D	TCGA-AA-3864	NO		NA			22	8	0	DBB0926A-CDD4-41E3-813E-E6207125B67F	Scheduled Follow-up Submission	Complete Remission/Response	NO	No	YES	NO	NA		NO	NO	21	NO		12	12		NA	0	NA	0	NA	No	M0	N0	T3	3864		TUMOR FREE	NO	3.12	YES	Complete Remission/Response	NO
TCGA-A6-6137-01A	55	123.74.0	Nationwide Children's Hospital	TCGA-A6-6137-F18036	a37c30e7-467e-4fb3-8336-9cc8aeaa8e11	TCGA-A6-6137	NO		NA	NO		22	3	0	930B8956-8FD5-4A62-B420-5AB360EBED70			YES	No	YES	NO	NA				21	NO		12	11	YES	NA	0	NA	0	NA	No	M0	N1c	T3	6137		TUMOR FREE	YES	2.2	YES		NO
TCGA-A6-6648-01A	56	123.74.0	Nationwide Children's Hospital	TCGA-A6-6648-F17988	e118640d-684b-463e-a65f-8a16cfde6344	TCGA-A6-6648	NO		NA	NO		22	1	0	42BD93CD-41C5-4FB1-8C83-F7D7B89AB642				No	YES	YES	NA	NO	YES		21	NO	NO	12	11	NO	0	1	5	0	NA	No	M1a	N0	T3	6648		TUMOR FREE	YES	2.5	YES		NO
TCGA-DM-A1D0-01A	79	132.71.0	Nationwide Children's Hospital	TCGA-DM-A1D0-F19074	4D4AB934-A4DF-42E4-83A3-6DBEEAF81AE1	TCGA-DM-A1D0	YES	Normal	NA			22	5	0	740891C6-4938-44C1-8FCC-B28FB85E33C1	Scheduled Follow-up Submission		NO	No	YES	YES	12	YES			10	NO	NO	12	12		0	0	4	2	NA	No	M0	N0	T3	A1D0				NA	YES
TCGA-AA-3678-01A	60	36.83.0	Nationwide Children's Hospital	TCGA-AA-3678-F38085	B25EE50A-4ED3-4E52-8722-931E8E9BAA95	TCGA-AA-3678	NO		NA			22	10	0	1C6BDB2A-156A-49BE-A4FA-F97335CB50C4	Scheduled Follow-up Submission	Complete Remission/Response	NO	No	YES	NO	NA		NO	NO	26	YES		12	12		NA	0	NA	1	NA	No	M0	N1	T2	3678		TUMOR FREE	YES	2	YES	Complete Remission/Response	NO
TCGA-AZ-6606-01A	81	138.78.0	Nationwide Children's Hospital	TCGA-AZ-6606-F34172	4604BF3C-B5B2-45B2-86AA-DE805C7D7810	TCGA-AZ-6606			NA			22	1	0	CD99B5A9-A589-4CE3-8E34-EF21329D34EC	Scheduled Follow-up Submission	Progressive Disease		No	YES		NA			NO	17	YES		12	8		NA	NA	NA	10	NA	No	M1	N2	T4	6606	YES	WITH TUMOR	YES	10.6	YES	Progressive Disease	NO
TCGA-D5-6920-01A	77	157.71.0	Nationwide Children's Hospital	TCGA-D5-6920-F29706	7c51dfe2-d915-4be3-9762-f3ca3dfe4476	TCGA-D5-6920	NO		NA	NO		22	26	0	871501FC-473D-4967-AB6C-5086E0A82B82	Scheduled Follow-up Submission		NO	No	YES	NO	NA		NO		5	NO		12	3	NO	NA	0	NA	0	0	No	M0	N0	T3	6920	NO	TUMOR FREE	NO	1.7	YES		NO
TCGA-AA-3549-01A	69	28.86.0	Nationwide Children's Hospital	TCGA-AA-3549-F37507	A318169E-5927-47ED-B574-0D5F52F854AF	TCGA-AA-3549	NO		NA			22	3	0	B6387546-55B4-4F70-B958-2510150D6C0D	Scheduled Follow-up Submission	Complete Remission/Response	YES	No	YES	NO	NA		NO	NO	31	NO		12	12		NA	0	NA	0	NA	No	M0	N0	T2	3549		TUMOR FREE	NO	0.76	YES	Complete Remission/Response	YES
TCGA-AA-3872-01A	45	41.78.0	Nationwide Children's Hospital			TCGA-AA-3872	NO		NA			22	NA	0	2E4A55EE-1D20-4AF2-84DD-E3F1084BEE08			NO	No	YES	NO	NA		NO		29	YES		12	NA		NA	0	NA	23	NA	No	M1	N2	T4	3872				NA	YES
TCGA-D5-6535-01A	80	116.77.0	Nationwide Children's Hospital	TCGA-D5-6535-F28924	4c8edf3f-088b-44b8-ac9a-3174e674e754	TCGA-D5-6535	NO		1	YES		22	2	0	EC155DA3-81A0-4E87-84C8-D0FDA8F92C48	Scheduled Follow-up Submission		NO	No	YES	NO	NA				6	YES		12	3	YES	NA	NA	NA	1	NA	No	MX	N1	T3	6535	YES	TUMOR FREE	NO	66.7	YES		NO
TCGA-D5-6540-01A	66	116.77.0	Nationwide Children's Hospital	TCGA-D5-6540-F28626	3c36a5cb-a781-4214-bd44-b0491edcc689	TCGA-D5-6540			NA	YES		22	27	0	C6D61BE1-C224-4058-838D-FCC7C4A08915	Scheduled Follow-up Submission		NO	No	YES	NO	NA				13	NO		12	2	NO	NA	NA	NA	0	0	No	M0	N0	T2	6540	NO	TUMOR FREE	NO	2	YES		NO
TCGA-DM-A1HB-01A	75	172.69.0	Nationwide Children's Hospital	TCGA-DM-A1HB-F19073	043C0172-CA50-4673-8F8B-1D3D02CAF515	TCGA-DM-A1HB	YES	Abnormal	NA	NO		22	5	0	AD5BC667-3D76-487F-BDB8-2AE27BAD4F44	Scheduled Follow-up Submission		NO	No	YES	YES	NA	NO			11	NO	YES	12	12		5	0	5	1	NA	No	M0	N1	T3	A1HB				NA	YES
TCGA-G4-6307-01A	37	116.77.0	Nationwide Children's Hospital	TCGA-G4-6307-F21940	59ed0f8f-0e78-4a58-820c-451e0ec019e9	TCGA-G4-6307	NO		NA	YES		22	25	0	2C976F84-320F-4FD6-A237-148CA5ED7667	Scheduled Follow-up Submission			No	YES	NO	NA				17	YES	NO	12	1	NO	NA	0	NA	2	NA	No	M0	N1	T3	6307	NO	TUMOR FREE	YES	10.2	YES		NO
TCGA-D5-5540-01A	73	89.77.0	Nationwide Children's Hospital	TCGA-D5-5540-F13830	728155f4-e2fa-49bd-a4d1-7c478bb7215f	TCGA-D5-5540	NO		70	NO		22	4	0	653D2520-9BB4-4300-94C6-836B25AF3965	Scheduled Follow-up Submission		NO	No	YES	NO	NA		NO		12	NO		12	7	NO	NA	0	NA	0	0	No	M0	N0	T3	5540	NO	TUMOR FREE	NO	1.7	YES		NO
TCGA-CM-6166-01A	48	89.77.0	Nationwide Children's Hospital	TCGA-CM-6166-F13935	1252f958-50a3-4119-b755-ed02e11638da	TCGA-CM-6166	NO		NA	NO		22	19	0	68BA633B-B362-46B5-A60A-E5B41AFD43B6	Scheduled Follow-up Submission		NO	No	YES	NO	NA		YES		33	NO		12	7	NO	NA	0	NA	0	NA	No	M0	N0	T2	6166	NO	TUMOR FREE	NO	1.3	YES		NO
TCGA-DM-A1D9-01A	67	132.71.0	Nationwide Children's Hospital	TCGA-DM-A1D9-F19079	1639BA4A-7C03-4A96-B3A8-9E1AD72C9943	TCGA-DM-A1D9	NO		NA	YES		22	5	0	D7AA1EAE-BE31-4851-A09D-A95395B0EA76	Scheduled Follow-up Submission		NO	No	YES	NO	NA				28	NO	NO	12	12		0	1	5	0	NA	No	M0	N0	T3	A1D9				NA	YES
TCGA-D5-6923-01A	57	157.71.0	Nationwide Children's Hospital	TCGA-D5-6923-F29707	06ff532c-3574-460a-bab3-b2b370dece40	TCGA-D5-6923	NO		10	NO		22	26	0	78B018BF-9090-42A6-8946-99777AFAC133	Scheduled Follow-up Submission		NO	No	YES	NO	NA		NO		11	NO	NO	12	3	NO	NA	0	NA	0	0	No	M0	N0	T2	6923	NO	TUMOR FREE	NO	1.8	YES		NO
TCGA-AA-3526-01A	57	28.86.0	Nationwide Children's Hospital	TCGA-AA-3526-F37308	A1C51A07-126C-44B3-AD37-202A4711211F	TCGA-AA-3526	NO		NA			22	1	0	7058A15D-810B-41C6-9728-F19438555F6D	Scheduled Follow-up Submission	Complete Remission/Response	YES	No	YES	NO	NA		NO	NO	17	NO		12	12		NA	2	NA	0	NA	No	M0	N0	T2	3526		TUMOR FREE	NO	2.06	YES	Complete Remission/Response	NO
TCGA-G4-6294-01A	75	123.74.0	Nationwide Children's Hospital	TCGA-G4-6294-F22034	62a43703-e6c3-4be9-83bd-d3d4e9e9d1b4	TCGA-G4-6294	NO		NA	YES		22	21	0	18D0D7C5-364C-4B6C-9C63-42478D646D15	Scheduled Follow-up Submission		NO	No	YES	NO	NA		NO		10	NO		12	2	NO	NA	0	NA	2	NA	Yes	M1	N1	T3	6294	NO	WITH TUMOR	YES	NA	YES		NO
TCGA-AA-3930-01A	66	41.78.0	Nationwide Children's Hospital	TCGA-AA-3930-F37985	4C38428C-E96C-4135-9E4E-0416F3A601A7	TCGA-AA-3930	NO		NA			22	8	0	245C14C9-A3B5-4BFD-8915-08E6BC67F144	Scheduled Follow-up Submission	Progressive Disease	NO	No	YES	NO	NA		NO	NO	29	YES		12	12		NA	0	NA	24	NA	No	M1	N2	T3	3930		WITH TUMOR	YES	NA	YES	Progressive Disease	NO
TCGA-AA-3854-01A	71	36.83.0	Nationwide Children's Hospital	TCGA-AA-3854-F38001	EB5A947D-2DD0-45E4-8D03-02B97240DA5C	TCGA-AA-3854	NO		NA			22	8	0	EB31A0E7-DCD8-4831-80D0-E5EFF0E8FD0D	Scheduled Follow-up Submission	Complete Remission/Response	YES	No	YES	NO	NA		NO	NO	12	YES		12	12		NA	0	NA	0	NA	No	M0	N0	T2	3854		TUMOR FREE	NO	NA	YES	Complete Remission/Response	NO
TCGA-SS-A7HO-01A	44	385.43.0	Nationwide Children's Hospital	TCGA-SS-A7HO-F71976	873C44EA-98EA-48F8-B615-B8157BB514C9	TCGA-SS-A7HO	NO		1	NO		22	31	0	C65A06B9-C9EF-43C6-A155-24052140B688	Scheduled Follow-up Submission		NO	No	YES	NO	NA		NO	NO	25	YES		12	3	NO	NA	0	NA	0	0	No	M0	N0	T4a	A7HO	NO	WITH TUMOR	YES	0	YES	Complete Remission/Response	NO
TCGA-AD-5900-01A	67	89.77.0	Nationwide Children's Hospital	TCGA-AD-5900-F42776	F5239F86-7BB6-436A-BFD0-1B0C782886B1	TCGA-AD-5900			NA	NO		22	30	0	655A25E9-37EE-4497-8623-C324EA3BADC4	Scheduled Follow-up Submission	Complete Remission/Response	NO	No	YES		NA			NO	11	NO		12	4		NA	0	NA	0	NA	No	MX	N0	T2	5900	NO		NO	NA	YES	Complete Remission/Response	NO
TCGA-A6-6138-01A	61	123.74.0	Nationwide Children's Hospital	TCGA-A6-6138-F17937	ffbc6fdc-d573-42b5-bd3f-bf948012482b	TCGA-A6-6138	NO		NA	YES		22	28	0	96B34E9C-1693-465D-8E59-99E28B97B082			NO	No	YES	NO	NA				24	NO		12	10	NO	NA	0	NA	0	NA	No	M0	N0	T2	6138		TUMOR FREE	NO	2.8	YES		NO
TCGA-CM-6170-01A	73	89.77.0	Nationwide Children's Hospital	TCGA-CM-6170-F13995	1e2d6522-acec-4c70-8901-6b46c3394708	TCGA-CM-6170	NO		NA	YES		22	19	0	4A7946AE-D4FA-461B-9DDC-7A315314C84C	Scheduled Follow-up Submission		YES	No	YES	NO	NA		NO		12	NO		12	7	NO	NA	0	NA	0	NA	No	M0	N0	T2	6170	NO	TUMOR FREE	NO	0.8	YES		NO
TCGA-F4-6807-01A	51	138.78.0	Nationwide Children's Hospital	TCGA-F4-6807-F35069	87FD22DD-F8E5-4E3D-B0D7-30C94649F108	TCGA-F4-6807	NO		NA	NO		22	14	0	82DE6931-CC6F-4390-977C-FEA49B236868	Scheduled Follow-up Submission	Complete Remission/Response	NO	No	YES	NO	NA		NO	NO	12	NO	NO	12	9	NO	0	NA	0	12	12	No	M0	N2b	T3	6807	NO	TUMOR FREE	YES	NA	YES	Complete Remission/Response	NO
TCGA-G4-6311-01A	80	116.77.0	Nationwide Children's Hospital	TCGA-G4-6311-F21920	fff8f999-e75e-4ceb-881d-eaf85fc19430	TCGA-G4-6311	NO		NA	NO		22	27	0	017FFD49-42A9-462C-940E-3C9322EBD077	Scheduled Follow-up Submission		NO	No	YES	NO	NA		YES		37	YES	NO	12	1	NO	NA	0	NA	1	NA	No	MX	N1	T3	6311	YES	TUMOR FREE	YES	0.9	YES		NO
TCGA-AA-3522-01A	67	28.86.0	Nationwide Children's Hospital	TCGA-AA-3522-F37302	1F9782D5-2B86-4AB3-B873-EEBAAF45910D	TCGA-AA-3522	NO		NA			22	1	0	2AB8D4B2-9A16-4969-A968-19FBBE44E4E3	Scheduled Follow-up Submission	Complete Remission/Response	YES	No	YES	NO	NA		NO	NO	18	YES		12	12		NA	0	NA	0	NA	Yes	M0	N0	T3	3522		TUMOR FREE	NO	0.96	YES	Complete Remission/Response	NO
TCGA-AZ-4614-01A	71	76.78.0	Nationwide Children's Hospital	TCGA-AZ-4614-F19856	2dfe3fab-275b-44f2-a179-cd71f09078c1	TCGA-AZ-4614			NA			22	30	0	B86C8E98-C970-44FC-AD91-BB86C0D9D0BD				No	YES		NA				4	YES		12	12	NO	NA	NA	NA	2	NA	No	M1	N1	T4a	4614	NO	WITH TUMOR	NO	49.7	YES		NO
TCGA-AA-3553-01A	61	28.86.0	Nationwide Children's Hospital	TCGA-AA-3553-F37509	29DBF706-091A-4486-8574-F8A7D2ACCAF1	TCGA-AA-3553	NO		NA			22	3	0	5D898B39-0B31-4E8D-9363-47E64E406068	Scheduled Follow-up Submission	Complete Remission/Response	YES	No	YES	NO	NA		NO	NO	21	NO		12	12		NA	0	NA	0	NA	No	M0	N0	T2	3553		TUMOR FREE	NO	NA	YES	Complete Remission/Response	NO
TCGA-G4-6297-01A	55	116.77.0	Nationwide Children's Hospital	TCGA-G4-6297-F22065	e4410ad5-024d-4692-b74e-a2b2c5c9f472	TCGA-G4-6297	NO		NA	YES		22	19	0	EF5D8C08-1709-499C-858F-3ADBC9C4E1AC	Scheduled Follow-up Submission		YES	No	YES	NO	NA		NO		36	YES		12	1	NO	NA	0	NA	6	NA	No	M1	N2	T3	6297	YES	WITH TUMOR	YES	NA	YES		NO
TCGA-AA-3502-01A	73	76.78.0	Nationwide Children's Hospital	TCGA-AA-3502-F37275	26FD1E03-8B6A-46D4-A2B1-FEDFA68A3E53	TCGA-AA-3502	NO		NA			22	1	0	68B84933-F794-4216-B45E-973B20C2651E	Scheduled Follow-up Submission		YES	No	YES	NO	NA		NO	NO	31			12	12		NA	0	NA	0	NA	No	M0	N0	T2	3502			NO	3.7	YES	Complete Remission/Response	NO
TCGA-CM-4744-01A	69	76.78.0	Nationwide Children's Hospital	TCGA-CM-4744-F6608	58eddeb6-3065-4010-9323-05fc35f4e2f2	TCGA-CM-4744	NO		NA	YES		22	24	0	9E7A317F-74A2-4D6F-AB91-FB432B9C6CF0			YES	No	YES	NO	NA		NO		28	YES		12	1	NO	NA	0	NA	0	NA	No	M0	N0	T2	4744	NO	TUMOR FREE	NO	0.9	YES		NO
TCGA-AZ-6601-01A	68	123.74.0	Nationwide Children's Hospital	TCGA-AZ-6601-F34152	A281F12A-3018-4200-8C91-6824D8128D05	TCGA-AZ-6601			NA			22	31	0	DEED8A4D-5B4F-4A99-A458-E3D34A8848D4	Scheduled Follow-up Submission	Progressive Disease		No	YES		NA			NO	11	YES		12	7		NA	NA	NA	0	NA	Yes	M0	N0	T3	6601	YES	WITH TUMOR	NO	1.8	YES	Progressive Disease	NO
TCGA-D5-6928-01A	80	157.71.0	Nationwide Children's Hospital	TCGA-D5-6928-F29714	4379456e-4118-4173-abde-f743c00e081b	TCGA-D5-6928	NO		65	NO		22	28	0	CDD5226B-D661-4CB7-8EAE-C3C3BC760F7B	Scheduled Follow-up Submission		NO	No	YES	NO	NA		NO		18	NO	NO	12	3	NO	NA	0	NA	0	NA	No	M0	N0	T3	6928	NO	TUMOR FREE	NO	1.8	YES		NO
TCGA-AA-A02Y-01A	73	66.81.0	Nationwide Children's Hospital	TCGA-AA-A02Y-F37278	3AF503B2-8405-4BFD-A28D-3CE34F771865	TCGA-AA-A02Y	NO		NA			22	1	0	E1276D72-3947-48BC-8F0A-94ABD667F5CF	Scheduled Follow-up Submission	Complete Remission/Response	NO	No	YES	NO	NA		NO	NO	18	YES		12	12		NA	0	NA	0	NA	No	M0	N0	T2	A02Y		TUMOR FREE	NO	0.98	YES	Complete Remission/Response	NO
TCGA-G4-6310-01A	69	116.77.0	Nationwide Children's Hospital	TCGA-G4-6310-F21927	3d26dfa2-5342-49fc-9e8c-67fb064d7cfa	TCGA-G4-6310	NO		8	NO		22	25	0	05350918-73E0-4299-8797-272CFAD4437A	Scheduled Follow-up Submission		NO	No	YES	NO	NA		YES		66	NO	NO	12	1	NO	NA	0	NA	1	NA	Yes	M0	N1	T3	6310	NO	TUMOR FREE	YES	NA	YES		YES
TCGA-AA-3867-01A	74	41.78.0	Nationwide Children's Hospital	TCGA-AA-3867-F37990	9D943DE2-F368-4514-B60D-2AD6315A5DA9	TCGA-AA-3867	NO		NA			22	8	0	96E3D2E8-E012-4ECA-9855-6ECEC66EC586	Scheduled Follow-up Submission		YES	No	YES	NO	NA		NO	NO	24	YES		12	12		NA	0	NA	4	NA	Yes	M1	N2	T3	3867		WITH TUMOR	NO	304.5	YES		NO
TCGA-DM-A1D7-01A	82	132.71.0	Nationwide Children's Hospital	TCGA-DM-A1D7-F19040	DA01E4AE-0CFA-4D8F-989A-3576230E8D13	TCGA-DM-A1D7	YES	Normal	NA			22	2	0	5DA8AAB6-9C07-477B-8BD6-000FD2EA3365	Additional New Tumor Event			No	YES	YES	NA	NO			15	NO	NO	12	12		0	0	5	0	NA	No	M0	N0	T3	A1D7				NA	YES
TCGA-AZ-5403-01A	43	89.77.0	Nationwide Children's Hospital	TCGA-AZ-5403-F32209	c08f9325-5b69-41d4-9706-4256f974f1e5	TCGA-AZ-5403			65			22	18	0	85F81361-FA04-436B-B53A-89268485CCEA	Scheduled Follow-up Submission			No	YES		NA				12	NO		12	5	NO	NA	0	NA	0	NA	No	MX	N0	T3	5403	YES	WITH TUMOR	NO	2.3	YES		NO
TCGA-NH-A6GB-01A	71	385.43.0	Nationwide Children's Hospital	TCGA-NH-A6GB-F64052	FB304E65-E495-4720-AAB8-1DED76C06642	TCGA-NH-A6GB	NO		25	NO		22	25	0	72ABF7D2-5CCA-4526-9292-8A407C53C9D4	Scheduled Follow-up Submission	Progressive Disease		No	YES	YES	NA	NO	NO	NO	13	NO		12	8	NO	NA	1	NA	7	NA	No	MX	N2b	T3	A6GB	NO	WITH TUMOR	YES	NA	YES	Progressive Disease	NO
TCGA-AA-3837-01A	67	36.83.0	Nationwide Children's Hospital	TCGA-AA-3837-F38115	AC108FF4-DD05-45FD-9BA6-53CD0927D398	TCGA-AA-3837	NO		NA			22	10	0	E7F377EC-4D28-4906-B7F5-50A3121AD360	Scheduled Follow-up Submission	Complete Remission/Response	YES	No	YES	NO	NA		NO	NO	36	YES		12	12		NA	2	NA	0	NA	No	M0	N0	T3	3837		TUMOR FREE	NO	NA	YES	Complete Remission/Response	NO
TCGA-CM-6165-01A	74	89.77.0	Nationwide Children's Hospital	TCGA-CM-6165-F13933	73ad0a22-ccd0-4a1a-a5c3-df8bbf673861	TCGA-CM-6165	NO		NA	NO		22	19	0	0CC634EB-1AB8-411C-AEFA-89210881985E	Scheduled Follow-up Submission		NO	No	YES	NO	NA		NO		20	NO		12	7	NO	NA	0	NA	0	NA	No	M0	N0	T3	6165	NO	TUMOR FREE	NO	1.9	YES		NO
TCGA-QG-A5Z2-01A	61	300.56.0	Nationwide Children's Hospital	TCGA-QG-A5Z2-F58666	374D3867-2F01-4A24-9A99-5E4E95FDE2A6	TCGA-QG-A5Z2	NO		NA	YES		22	18	0	BA26BFB1-D240-4E16-9A74-FD41579D7CC6	Scheduled Follow-up Submission	Complete Remission/Response	NO	No	YES	NO	NA		NO	NO	23	NO		12	4		NA	0	NA	0	NA	No	M0	N0	T2	A5Z2	NO	TUMOR FREE	NO	1.52	YES	Complete Remission/Response	NO
TCGA-CM-5348-01A	72	116.77.0	Nationwide Children's Hospital	TCGA-CM-5348-F11073	3c365d30-5309-45a7-b628-7d656b45cafb	TCGA-CM-5348	NO		NA	YES		22	3	0	971E396B-021C-47E5-B7D4-5CF8A04945BF			YES	No	YES	NO	NA		NO		19	YES		12	5	NO	NA	0	NA	1	NA	No	M0	N1a	T3	5348	YES	TUMOR FREE	NO	3.6	YES		NO
TCGA-AD-6963-01A	58	157.71.0	Nationwide Children's Hospital	TCGA-AD-6963-F47190	3BFE1894-8F19-4850-8F76-C5DA73AAF49A	TCGA-AD-6963	NO		48			22	22	0	AAAB3374-2B62-437D-8783-FEF44F484502	Scheduled Follow-up Submission	Complete Remission/Response		No	YES	NO	NA		NO	NO	12	NO		12	8	NO	NA	2	NA	0	NA	No	MX	N0	T3	6963		TUMOR FREE	NO	5.5	YES	Complete Remission/Response	NO
TCGA-AA-3511-01A	64	138.78.0	Nationwide Children's Hospital	TCGA-AA-3511-F37282	0455CE0A-2E50-467D-A71B-B5B65FD7ED51	TCGA-AA-3511	NO		NA			22	1	0	C0E7EAF8-833F-4D99-8D40-20C46FC1131C	Scheduled Follow-up Submission	Complete Remission/Response	NO	No	YES	NO	NA		NO	NO	36	YES		12	12		NA	0	NA	0	NA	No	M0	N0	T4	3511		TUMOR FREE	NO	35.95	YES	Complete Remission/Response	NO
TCGA-D5-6532-01A	61	116.77.0	Nationwide Children's Hospital	TCGA-D5-6532-F28623	20ad0e10-8b26-4e04-afa5-99b9f2f686ef	TCGA-D5-6532			10			22	27	0	9EFBEBF5-3647-468F-8CF3-9C50D5C803BB	Scheduled Follow-up Submission		NO	No	YES	NO	NA				10	NO		12	2	NO	NA	NA	NA	0	0	No	M0	N0	T3	6532	NO	TUMOR FREE	NO	1.7	YES		NO
TCGA-DM-A28F-01A	73	154.69.0	Nationwide Children's Hospital	TCGA-DM-A28F-F19066	7402E1C9-2010-4212-9C2F-B89E2583811A	TCGA-DM-A28F	YES	Normal	NA	YES		22	2	0	589B41B4-3F5E-4CB0-96DD-142FA39EC465	Scheduled Follow-up Submission		YES	No	YES	YES	NA	NO			23		NO	12	12		0	2	7	1	NA	No	M0	N1	T3	A28F				NA	YES
TCGA-A6-5661-01A	80	89.77.0	Nationwide Children's Hospital	TCGA-A6-5661-F12339	4597b875-a4a6-4c87-9d2e-bf4b05f03c69	TCGA-A6-5661	NO		NA	YES		22	27	0	FBBBF827-3416-4231-8DA3-3C149C08429D			YES	No	YES	NO	NA		YES		21	NO	YES	12	5	NO	5	2	5	0	NA	No	M0	N0	T3	5661		TUMOR FREE	NO	4.1	YES		NO
TCGA-A6-5661-01B	80	89.77.0	Nationwide Children's Hospital	TCGA-A6-5661-F12339	4597b875-a4a6-4c87-9d2e-bf4b05f03c69	TCGA-A6-5661	NO		NA	YES		22	27	0	FBBBF827-3416-4231-8DA3-3C149C08429D			YES	No	YES	NO	NA		YES		21	NO	YES	12	5	NO	5	2	5	0	NA	No	M0	N0	T3	5661		TUMOR FREE	NO	4.1	YES		NO
TCGA-AZ-4308-01A	47	76.78.0	Nationwide Children's Hospital	TCGA-AZ-4308-F19852	b227cfa3-9e85-4720-b2b8-903b59232ca6	TCGA-AZ-4308			1			22	30	0	87BFB22B-3D57-44FE-AF0C-84E4BB6F083B				No	YES		NA		YES		14	YES	NO	12	12		0	NA	5	3	NA	No	M0	N1	T3	4308	NO	TUMOR FREE	YES	0.5	YES		NO
TCGA-G4-6586-01A	73	123.74.0	Nationwide Children's Hospital	TCGA-G4-6586-F21888	ca0e57d3-a4db-4194-ab5c-3fd15caa2377	TCGA-G4-6586	NO		NA	NO		22	31	0	77C149D2-96B6-4EBB-B195-0A57B55B1EA7	Scheduled Follow-up Submission		NO	No	YES	NO	NA		NO		17	YES		12	1	NO	NA	1	NA	0	NA	Yes	M0	N0	T3	6586	NO	TUMOR FREE	NO	NA	YES		NO
TCGA-AA-3845-01A	86	41.78.0	Nationwide Children's Hospital			TCGA-AA-3845	NO		NA			22	NA	0	C696E736-A7AE-4138-9AED-5BE0F899C0C4			NO	No	YES	NO	NA		NO		12	YES		12	NA		NA	0	NA	0	NA	No	M0	N0	T3	3845				NA	YES
TCGA-AA-A01P-01A	80	66.81.0	Nationwide Children's Hospital	TCGA-AA-A01P-F37297	3ACB864C-2C63-4A17-B328-9B4146D83682	TCGA-AA-A01P	NO		NA			22	1	0	E2DA0BCE-5657-450B-A26C-0BA7BB95959F	Scheduled Follow-up Submission		NO	No	YES	NO	NA		NO	NO	21	YES		12	12		NA	0	NA	1	NA	No	M0	N1	T3	A01P			NO	1.11	YES		NO
TCGA-AZ-4682-01B	61	76.78.0	Nationwide Children's Hospital	TCGA-AZ-4682-F19860	0362c34c-8577-47bf-b8c3-03677d2ee7c0	TCGA-AZ-4682			NA			22	30	0	9EFA37E3-C427-4D77-9B4C-D75827693665				No	YES		NA				3	NO		12	12	YES	NA	NA	NA	0	NA	No	M1	N0	T3	4682		WITH TUMOR	YES	NA	YES		NO
TCGA-D5-6927-01A	34	157.71.0	Nationwide Children's Hospital	TCGA-D5-6927-F29715	3badbc1c-a0fe-42fc-9fb0-504bde8ae2a9	TCGA-D5-6927	NO		13	NO		22	28	0	A3EE9AEA-E4D1-453A-BEC2-6F2343275193	Scheduled Follow-up Submission		NO	No	YES	NO	NA		NO		16	NO	NO	12	3	NO	NA	1	NA	0	NA	No	M0	N0	T3	6927	NO	TUMOR FREE	NO	0.9	YES		NO
TCGA-F4-6569-01A	60	123.74.0	Nationwide Children's Hospital	TCGA-F4-6569-F29718	BBB2FCC3-A627-4B43-8AE4-EFF5AFC25D8B	TCGA-F4-6569	NO		NA			22	19	0	4D3994BB-89DE-48F4-B333-AF3576040A5F	Scheduled Follow-up Submission			No	YES	NO	NA				19	NO		12	3	NO	NA	0	NA	0	0	No	M0	N0	T2	6569	NO	TUMOR FREE	YES	NA	YES		NO
TCGA-AA-3949-01A	87	41.78.0	Nationwide Children's Hospital	TCGA-AA-3949-F37981	AEF77669-A4D5-4595-B86E-5001F2BCDEE8	TCGA-AA-3949	NO		NA			22	8	0	181145D3-5FA0-4FBA-AC03-2C83CEAA5B65	Scheduled Follow-up Submission	Complete Remission/Response	NO	No	YES	NO	NA		NO	NO	19	NO		12	12		NA	0	NA	3	NA	No	M0	N1	T3	3949		TUMOR FREE	NO	NA	YES	Complete Remission/Response	NO
TCGA-AD-A5EJ-01A	74	300.56.0	Nationwide Children's Hospital			TCGA-AD-A5EJ			1	YES		22	NA	0	D6B59AC1-30C6-48CD-A3CC-EB424C26B7F1				No	YES		NA				32	NO		12	NA	NO	NA	NA	NA	0	NA	No	MX	N0	T3	A5EJ	NO			NA	YES
TCGA-A6-2672-01A	82	29.82.0	Nationwide Children's Hospital	TCGA-A6-2672-F2080	49e421b1-e78f-4fec-a3e8-d82944961098	TCGA-A6-2672	NO		NA	NO		22	7	0	775CDD1E-8C8D-4173-9AA1-13B39D480018			YES	No	YES	NO	NA				29	YES		12	10	NO	NA	0	NA	1	NA	No	M0	N1	T3	2672		TUMOR FREE	NO	3.4	YES		NO
TCGA-A6-2672-01B	82	29.82.0	Nationwide Children's Hospital	TCGA-A6-2672-F2080	49e421b1-e78f-4fec-a3e8-d82944961098	TCGA-A6-2672	NO		NA	NO		22	7	0	775CDD1E-8C8D-4173-9AA1-13B39D480018			YES	No	YES	NO	NA				29	YES		12	10	NO	NA	0	NA	1	NA	No	M0	N1	T3	2672		TUMOR FREE	NO	3.4	YES		NO
TCGA-F4-6463-01A	51	116.77.0	Nationwide Children's Hospital	TCGA-F4-6463-F29713	AB1EE0F1-5753-4E0B-B5E0-A6396B494BB3	TCGA-F4-6463	NO		NA			22	28	0	15D9DED5-F3FB-4971-ACDC-314EB5A6E072	Scheduled Follow-up Submission			No	YES	NO	NA				18	NO		12	3	NO	NA	0	NA	0	0	No	M0	N0	T3	6463	NO	TUMOR FREE	NO	NA	YES		NO
TCGA-AY-A54L-01A	74	300.56.0	Nationwide Children's Hospital	TCGA-AY-A54L-F55757	147E0DA1-63D4-426F-A6F1-871537C1A230	TCGA-AY-A54L			NA	NO		22	14	0	18FF32FE-18AA-4BD0-9A8F-AF69377E3CA7	Scheduled Follow-up Submission	Partial Remission/Response	NO	No	YES		NA		YES	NO	24	NO	NO	12	1	NO	NA	1	NA	0	NA	No	M0	N0	T2	A54L	NO	WITH TUMOR	NO	2.5	YES	Complete Remission/Response	NO
TCGA-CM-6678-01A	63	138.78.0	Nationwide Children's Hospital	TCGA-CM-6678-F15658	d71fff85-b23d-40f1-a031-2f55c6405b23	TCGA-CM-6678	YES	Normal	NA	NO		22	NA	0	A694F624-65DE-4C0B-BEF4-AB1B44851617	Scheduled Follow-up Submission		NO	No	YES	YES	12	YES	NO		19	NO		12	8	YES	NA	1	NA	0	NA	No	M1a	N1c	T4a	6678	NO	TUMOR FREE	YES	286.6	YES		NO
TCGA-D5-6898-01A	51	157.71.0	Nationwide Children's Hospital	TCGA-D5-6898-F29704	1d4ecc0c-2e03-4d83-8d35-9eed43623f72	TCGA-D5-6898	NO		23	NO		22	28	0	1E975B5B-1B00-445C-8AF3-98EDA6D9268C	Scheduled Follow-up Submission		NO	No	YES	NO	NA		NO		8	NO	NO	12	3	NO	NA	0	NA	0	NA	No	M0	N0	T2	6898	NO	TUMOR FREE	NO	8.1	YES		NO
TCGA-NH-A8F8-01A	79	422.38.0	Nationwide Children's Hospital	TCGA-NH-A8F8-F67097	1DA4F0B8-1AEC-47E8-8B55-F9FB0F18A2F1	TCGA-NH-A8F8	NO		80	NO		22	30	0	90AAD9C3-CAE9-49A3-85D9-50A4FBBB35C9	Scheduled Follow-up Submission		YES	No	YES	YES	12	YES	NO	NO	22	YES	NO	12	10	YES	NA	0	NA	15	NA	No	M1	N2b	T4a	A8F8	NO	WITH TUMOR	YES	24.9	YES		NO
TCGA-A6-6140-01A	62	123.74.0	Nationwide Children's Hospital	TCGA-A6-6140-F20353	2d883e40-6e47-469d-996d-6e59563a0f28	TCGA-A6-6140	NO		NA	NO		22	16	0	C7B64D00-909C-4878-8F34-7ED9DC8A2512			NO	No	YES	NO	NA				46	NO		12	1	NO	NA	0	NA	0	NA	No	M0	N0	T3	6140		TUMOR FREE	YES	1.3	YES		NO
TCGA-CK-4952-01A	48	116.77.0	Nationwide Children's Hospital	TCGA-CK-4952-F9748	112c687f-cc16-4102-a7d3-eaf410addfa1	TCGA-CK-4952	NO		21	NO		22	31	0	32BF9E6B-7E05-4093-AF5E-4AE5FE499EAB			NO	No	YES	NO	NA		NO		31	NO	NO	12	3	NO	0	NA	10	5	0	No	M0	N2	T4	4952	NO	TUMOR FREE		NA	YES
TCGA-AD-6548-01A	81	138.78.0	Nationwide Children's Hospital	TCGA-AD-6548-F42777	D4B7D882-E20C-4891-B587-258174C8B3BB	TCGA-AD-6548			4	YES		22	30	0	E8717F1B-A1A9-4669-B23D-73C94D612BDC	Scheduled Follow-up Submission	Complete Remission/Response	YES	No	YES		NA			NO	12	NO		12	4		NA	0	NA	0	NA	No	M0	N0	T2	6548		TUMOR FREE	NO	2.6	YES	Complete Remission/Response	NO
TCGA-G4-6320-01A	73	116.77.0	Nationwide Children's Hospital	TCGA-G4-6320-F21910	cb06e666-d3ef-4c7c-a79a-4c1ac6ab428c	TCGA-G4-6320	NO		NA	YES		22	30	0	DEA9700D-1646-4BA3-81CA-BADF7A90E0BC	Scheduled Follow-up Submission		NO	No	YES	NO	NA		NO		65	YES		12	1	NO	NA	0	NA	2	NA	No	MX	N1	T3	6320	NO	TUMOR FREE	YES	2.7	YES		NO
TCGA-AA-A00J-01A	80	30.80.0	Nationwide Children's Hospital	TCGA-AA-A00J-F37934	58F5600A-7ED6-4DE3-8793-E927257C4EF3	TCGA-AA-A00J	NO		NA			22	6	0	771B774A-97AC-4015-B361-0B9A26B00D97	Scheduled Follow-up Submission	Partial Remission/Response	YES	No	YES	NO	NA		NO	NO	24	YES		12	12		NA	0	NA	2	NA	No	M0	N1	T4	A00J		TUMOR FREE	YES	NA	YES	Partial Remission/Response	NO
TCGA-AA-3496-01A	83	138.78.0	Nationwide Children's Hospital			TCGA-AA-3496	NO		NA			22	NA	0	3D1AD2FD-EFC5-4F91-9441-01624ED0F170			NO	No	YES	NO	NA		NO		23			12	NA		NA	0	NA	0	NA	Yes	M0	N0	T3	3496				0.2	YES
TCGA-F4-6459-01A	61	123.74.0	Nationwide Children's Hospital	TCGA-F4-6459-F29831	05EBC8EB-FA35-4BE4-9E17-29A5F91E2AA7	TCGA-F4-6459	NO		NA	NO		22	29	0	3DCE3537-6463-4142-9A6E-8B012E727890	Scheduled Follow-up Submission		NO	No	YES	NO	NA		NO		6	NO		12	3	NO	NA	NA	NA	6	0	No	M0	N2a	T3	6459	NO	TUMOR FREE	NO	NA	YES		NO
TCGA-CM-5861-01A	63	89.77.0	Nationwide Children's Hospital	TCGA-CM-5861-F13889	64d79a4f-f5e1-4f5d-9335-4fede65e8aa5	TCGA-CM-5861			NA	NO		22	18	0	477D472D-8EA6-4561-A815-EE3826D77D7A	Scheduled Follow-up Submission		NO	No	YES	NO	NA		NO		28	NO		12	7	NO	NA	0	NA	0	NA	No	M0	N0	T3	5861	YES	TUMOR FREE	NO	3.2	YES		NO
TCGA-CK-6746-01A	84	138.78.0	Nationwide Children's Hospital	TCGA-CK-6746-F14824	1befcb0c-afb7-40c0-b4ae-cb5807cabcab	TCGA-CK-6746	NO		20	NO		22	NA	0	B91D3B36-347A-496C-9372-51DFB14AC0FC			NO	No	YES	NO	NA		YES		NA	NO		12	8	NO	NA	NA	NA	NA	NA	No	MX	N0	T4b	6746	YES	TUMOR FREE	NO	NA
TCGA-AY-4071-01A	63	45.80.0	Nationwide Children's Hospital	TCGA-AY-4071-F10086	4fb84d41-5c59-47e8-a4a2-025ed838701f	TCGA-AY-4071	NO		NA	YES		22	7	0	CB544AA8-ADEA-4EBF-BFD5-7FF991743C87			YES	No	YES	NO	NA		NO		25	NO		12	4	NO	NA	0	NA	0	NA	No		N0	T1	4071	NO	TUMOR FREE	NO	6	YES		NO
TCGA-A6-6649-01A	66	123.74.0	Nationwide Children's Hospital	TCGA-A6-6649-F19130	94a3ae6f-1301-4a8f-8cc1-bccc72c5b005	TCGA-A6-6649	NO		NA	YES		22	2	0	569764C2-DC6F-46CE-A6EE-CEDA98A1B6E7			YES	No	YES	NO	NA				23	YES		12	12	YES	NA	0	NA	2	NA	Yes	M0	N1b	T3	6649	YES	TUMOR FREE	YES	10.9	YES		NO
TCGA-NH-A50T-01A	68	300.56.0	Nationwide Children's Hospital	TCGA-NH-A50T-F50647	D9756179-A885-4B19-A492-F11FF3522066	TCGA-NH-A50T	NO		NA	NO		22	28	0	11A1FE0B-F17D-4CA1-9451-BD2DD1C3133D	Scheduled Follow-up Submission	Complete Remission/Response	NO	No	YES	NO	NA			NO	10	NO	NO	12	10	YES	NA	0	NA	0	0	No	MX	N0	T3	A50T	NO	TUMOR FREE	NO	1.4	YES	Complete Remission/Response	NO
TCGA-DM-A285-01A	71	154.69.0	Nationwide Children's Hospital	TCGA-DM-A285-F19064	092D6CE5-DC12-4656-ADBA-1C40E4682633	TCGA-DM-A285	YES	Normal	NA	YES		22	2	0	50EEFC17-C5FB-43AC-BFC6-5AC9F7BAB25B	Scheduled Follow-up Submission		YES	No	YES	YES	NA	NO			18		NO	12	12		0	0	NA	11	NA	Yes	M1	N2	T3	A285				NA	YES
TCGA-AA-A00U-01A	50	30.80.0	Nationwide Children's Hospital	TCGA-AA-A00U-F37314	68EDBD99-5315-477A-A969-8A979FD02A8F	TCGA-AA-A00U	NO		NA			22	1	0	51348B30-BD7F-4154-A115-FA89039C2CF2	Scheduled Follow-up Submission	Complete Remission/Response	YES	No	YES	NO	NA		NO	NO	NA	NO		12	12		NA	0	NA	NA	NA	No	M0	N1	T3	A00U		TUMOR FREE	YES	NA	YES	Complete Remission/Response	NO
TCGA-AA-3970-01A	65	41.78.0	Nationwide Children's Hospital	TCGA-AA-3970-F37949	FF73958F-360C-43C3-9677-3E75FB84464B	TCGA-AA-3970	NO		NA			22	6	0	CABD5248-CD67-4F9B-8D53-5B8572BCBCA2	Scheduled Follow-up Submission	Complete Remission/Response	YES	No	YES	NO	NA		NO	NO	27	NO		12	12		NA	0	NA	0	NA	No	M0	N0	T3	3970		TUMOR FREE	NO	NA	YES	Complete Remission/Response	NO
TCGA-AA-A01D-01A	47	33.79.0	Nationwide Children's Hospital	TCGA-AA-A01D-F37305	26344A26-417D-42DC-B6A6-3C793D445365	TCGA-AA-A01D	NO		NA			22	1	0	410337C2-82E3-4E97-AB6E-1BCABDE71C72	Scheduled Follow-up Submission	Progressive Disease	NO	No	YES	NO	NA		NO	NO	12	YES		12	12		NA	0	NA	12	NA	No	M0	N2	T3	A01D		WITH TUMOR	YES	NA	YES	Progressive Disease	NO
TCGA-AA-3542-01A	69	28.86.0	Nationwide Children's Hospital	TCGA-AA-3542-F37322	FB094A2F-6E19-4AB1-8D1F-78D3895A57CD	TCGA-AA-3542	NO		NA			22	1	0	F92359FE-5A53-42B3-8F8E-23E4910B1958	Scheduled Follow-up Submission	Complete Remission/Response	YES	No	YES	NO	NA		NO	NO	18	YES		12	12		NA	1	NA	4	NA	No	M0	N2	T3	3542		TUMOR FREE	YES	1.93	YES	Complete Remission/Response	NO
TCGA-AA-A00N-01A	75	33.79.0	Nationwide Children's Hospital			TCGA-AA-A00N	NO		NA			22	NA	0	40F14FB6-2255-4CC0-9842-F2C982791DD6			YES	No	YES	NO	NA		NO		21	YES		12	NA		NA	0	NA	0	NA	No	M0	N0	T4	A00N				9.01	YES
TCGA-D5-6534-01A	62	157.71.0	Nationwide Children's Hospital	TCGA-D5-6534-F58486	9714D280-AEF1-4D26-8D99-3CF1C7FA5DB8	TCGA-D5-6534	NO		NA	YES		22	11	0	C0ACF7A4-0CA1-4C87-9A60-611C3D54E949	Scheduled Follow-up Submission	Complete Remission/Response	YES	No	YES	NO	NA			NO	22	NO		12	4	NO	NA	NA	NA	0	NA	No	M0	N0	T3	6534	YES	TUMOR FREE	NO	0.9	YES	Complete Remission/Response	NO
TCGA-AA-3852-01A	88	36.83.0	Nationwide Children's Hospital			TCGA-AA-3852	NO		NA			22	NA	0	55A5B638-59DA-46AA-87B7-536C465C6A7F			YES	No	YES	NO	NA		NO		13	YES		12	NA		NA	0	NA	0	NA	No	M0	N0	T3	3852				NA	YES
TCGA-AA-3530-01A	80	41.78.0	Nationwide Children's Hospital	TCGA-AA-3530-F37312	60CACA5D-BC3E-4B00-977D-744A56DB765E	TCGA-AA-3530	NO		NA			22	1	0	7D5C4615-94F1-4C00-B580-734372258C8E	Scheduled Follow-up Submission	Complete Remission/Response	YES	No	YES	NO	NA		NO	NO	24	NO		12	12		NA	0	NA	0	NA	Yes	M0	N0	T2	3530		TUMOR FREE	NO	1.88	YES	Complete Remission/Response	NO
TCGA-G4-6293-01A	49	116.77.0	Nationwide Children's Hospital	TCGA-G4-6293-F21799	38cdb95b-9cce-43d4-b3db-3b0ebc66f744	TCGA-G4-6293	NO		NA	YES		22	19	0	2CF39EE2-30E9-4962-9CD1-9F1565E60750	Scheduled Follow-up Submission		NO	No	YES	NO	NA		YES		26	NO	YES	12	1	NO	NA	1	NA	1	NA	No	M0	N1	T3	6293	NO	TUMOR FREE	YES	NA	YES		NO
TCGA-AA-A024-01A	81	33.79.0	Nationwide Children's Hospital	TCGA-AA-A024-F37288	A68DA852-7F42-4C35-8871-76D24DEC29D0	TCGA-AA-A024	NO		NA			22	1	0	50DCC7B3-0B72-467A-A55E-AC1F5498D769	Scheduled Follow-up Submission	Complete Remission/Response	NO	No	YES	NO	NA		NO	NO	14			12	12		NA	0	NA	0	NA	Yes	M0	N0	T3	A024		TUMOR FREE	NO	3.77	YES	Complete Remission/Response	NO
TCGA-D5-5539-01A	60	89.77.0	Nationwide Children's Hospital	TCGA-D5-5539-F20729	747a6f16-843f-475d-a1af-3bba604fc855	TCGA-D5-5539	NO		NA			22	19	0	C72B238A-5A2B-4600-949E-6A0EF92F262A	Scheduled Follow-up Submission			No	YES	NO	NA				4	YES		12	1	NO	NA	NA	NA	1	0	No	M0	N1	T3	5539		WITH TUMOR	YES	5.1	YES		NO
TCGA-AD-6890-01A	65	157.71.0	Nationwide Children's Hospital	TCGA-AD-6890-F48782	38F632B0-5D0F-497A-AED9-BCA2171B5FC0	TCGA-AD-6890	NO		10	YES		22	20	0	DD8EC547-3482-41F6-AFBF-413A36CB6F1D	Scheduled Follow-up Submission	Complete Remission/Response		No	YES	NO	NA		NO	NO	22	NO		12	9	NO	NA	2	NA	0	NA	No	MX	N0	T1	6890		TUMOR FREE	NO	0.8	YES	Complete Remission/Response	NO
TCGA-A6-A5ZU-01A	59	300.56.0	Nationwide Children's Hospital	TCGA-A6-A5ZU-F51209	6ECF4958-2F65-442A-B152-5460B63406E3	TCGA-A6-A5ZU	NO		NA	NO		22	13	0	C0499703-E6D9-41A9-A13E-EA8006AE0800	Scheduled Follow-up Submission	Complete Remission/Response	NO	No	YES	NO	NA		YES	NO	60	YES	NO	12	11	YES	NA	0	NA	1	NA	No	M0	N1	T3	A5ZU		TUMOR FREE	YES	1.6	YES	Complete Remission/Response	NO
TCGA-A6-2678-01A	43	28.86.0	Nationwide Children's Hospital	TCGA-A6-2678-F2526	fd97dc90-ee0e-42dd-82ef-992ccbbc0559	TCGA-A6-2678	NO		NA	NO		22	25	0	AE4C4846-93FA-436E-B9EC-AD7D5F3CF534			NO	No	YES	NO	NA		YES		26	YES	NO	12	10	NO	0	1	4	2	NA	No	M0	N1	T3	2678		TUMOR FREE	YES	13.5	YES		NO
TCGA-AA-3710-01A	80	41.78.0	Nationwide Children's Hospital	TCGA-AA-3710-F38099	7BB6223F-E63D-4581-B21F-B7561591D123	TCGA-AA-3710	NO		NA			22	10	0	0764110A-BBF6-442E-92CD-EC589EA8098D	Scheduled Follow-up Submission	Complete Remission/Response	YES	No	YES	NO	NA		NO	NO	20	YES		12	12		NA	0	NA	0	NA	No	M0	N0	T3	3710		TUMOR FREE	NO	5.12	YES	Complete Remission/Response	NO
TCGA-AY-6196-01A	47	116.77.0	Nationwide Children's Hospital	TCGA-AY-6196-F21742	67f6053c-81fe-4190-a695-1dd09993577f	TCGA-AY-6196	NO		NA	NO		22	20	0	FC468624-8A8F-432C-AFA2-BCEFA42036D5			NO	No	YES	NO	NA		YES		14	YES	NO	12	2	YES	NA	1	NA	12	NA	No		N2b	T3	6196	NO	TUMOR FREE		5.5	YES
TCGA-AA-3697-01A	77	116.77.0	Nationwide Children's Hospital	TCGA-AA-3697-F38098	07FD1649-F843-448D-82A0-03DCF86A777A	TCGA-AA-3697	NO		NA			22	10	0	A58ABA48-3D3E-4818-B2ED-98267F83DDE1	Scheduled Follow-up Submission		NO	No	YES	NO	NA		NO	NO	50			12	12		NA	0	NA	0	NA	No	M0	N0	T3	3697			NO	4.6	YES		NO
TCGA-CM-6172-01A	70	89.77.0	Nationwide Children's Hospital	TCGA-CM-6172-F14264	d180aa0c-ec3a-446b-b981-6811e90280db	TCGA-CM-6172	NO		NA	NO		22	26	0	B957206E-368A-4B4F-AD71-503A1D9C25CC	Scheduled Follow-up Submission		NO	No	YES	NO	NA		NO		17	NO		12	7	NO	NA	0	NA	1	NA	No	M0	N1a	T3	6172	NO	TUMOR FREE	YES	2.8	YES		NO
TCGA-T9-A92H-01A	82	385.43.0	Nationwide Children's Hospital	TCGA-T9-A92H-F69239	384957FB-FAFF-40F5-A5F7-817FAC4DD9C1	TCGA-T9-A92H	NO		53	NO		22	30	0	CEF65DE4-6AA9-4CF4-8736-6DFE84F7CB70	Scheduled Follow-up Submission	Progressive Disease	NO	No	YES	NO	NA		NO	NO	13	NO	NO	12	12	NO	NA	NA	NA	NA	NA	No	M0	N0	T3	A92H	YES	WITH TUMOR	NO	NA	YES	Complete Remission/Response	NO
TCGA-AD-6965-01A	62	157.71.0	Nationwide Children's Hospital	TCGA-AD-6965-F47143	35430D11-7EE9-42EB-AC57-5148A88E8D95	TCGA-AD-6965	NO		NA			22	22	0	30086B20-FF71-4B7C-B5E6-53CDF213AE1A	Scheduled Follow-up Submission	Progressive Disease		No	YES	NO	NA		NO	NO	17	YES		12	8	NO	NA	1	NA	11	NA	No	M0	N2b	T4a	6965		WITH TUMOR	YES	NA	YES	Complete Remission/Response	NO
TCGA-A6-5660-01A	73	89.77.0	Nationwide Children's Hospital	TCGA-A6-5660-F12414	38affb8d-f8ed-4aa8-a42c-edd6bdc795e3	TCGA-A6-5660	NO		NA	YES		22	1	0	9AF609E8-893C-4739-9A93-CA888614B7BC			NO	No	YES	NO	NA		NO		23	YES		12	6	YES	NA	0	NA	11	NA	No	M0	N2b	T3	5660		TUMOR FREE	YES	0.8	YES		NO
TCGA-AA-3531-01A	75	28.86.0	Nationwide Children's Hospital	TCGA-AA-3531-F37315	4B7183C5-7857-4D7A-A996-1495DF05F4CA	TCGA-AA-3531	NO		NA			22	1	0	B8E21336-51B5-4930-8455-009AAC93A733	Scheduled Follow-up Submission	Complete Remission/Response	NO	No	YES	NO	NA		NO	NO	37	NO		12	12		NA	0	NA	0	NA	Yes	M0	N0	T3	3531		TUMOR FREE	NO	0.65	YES	Complete Remission/Response	NO
TCGA-NH-A5IV-01A	90	385.43.0	Nationwide Children's Hospital	TCGA-NH-A5IV-F55782	91BB200A-6B03-42E1-B4F9-32CA6B6008A7	TCGA-NH-A5IV	NO		30	NO		22	15	0	10ECBB7E-09C7-436F-AD49-3358D9EF262D	Scheduled Follow-up Submission		YES	No	YES	NO	NA			NO	12	NO		12	1	NO	NA	0	NA	0	0	No	MX	N0	T3	A5IV	NO		NO	11.8	YES	Complete Remission/Response	NO
TCGA-G4-6299-01A	69	123.74.0	Nationwide Children's Hospital	TCGA-G4-6299-F22028	cb9fbe96-b7d6-4ab4-8c09-98fa666fc952	TCGA-G4-6299	NO		NA	NO		22	20	0	F66AFAA7-BAE7-4B59-BC06-09DC07764ACE	Scheduled Follow-up Submission		NO	No	YES	NO	NA		NO		17	YES		12	1	NO	NA	0	NA	8	NA	No	M0	N2	T3	6299	NO	TUMOR FREE	YES	NA	YES		NO
TCGA-AA-3562-01A	82	28.86.0	Nationwide Children's Hospital	TCGA-AA-3562-F37516	514803E9-5964-4C55-B49A-83AF0D222A67	TCGA-AA-3562	NO		NA			22	3	0	EAD997FD-E458-4C2B-A204-925DA138BF32	Scheduled Follow-up Submission		YES	No	YES	NO	NA		NO	NO	28	YES		12	12		NA	0	NA	7	NA	Yes	M0	N2	T3	3562			YES	NA	YES		NO
TCGA-D5-6926-01A	65	157.71.0	Nationwide Children's Hospital	TCGA-D5-6926-F29708	ea66d5f0-67f6-4508-a51f-6c3bf90e1f40	TCGA-D5-6926	NO		NA	NO		22	26	0	13EC59BC-986A-479E-8EDF-DB137E528D91	Scheduled Follow-up Submission		NO	No	YES	NO	NA		NO		34	NO	NO	12	3	NO	NA	0	NA	3	NA	No	M0	N1	T4a	6926	NO	TUMOR FREE	YES	2.2	YES		YES
TCGA-CM-4751-01A	62	138.78.0	Nationwide Children's Hospital	TCGA-CM-4751-F14661	1fae9028-35a5-42dc-878d-02b34e17e449	TCGA-CM-4751	NO		NA	NO		22	8	0	7D3C8C42-78C5-4B61-B817-12A12BB9C52F	Scheduled Follow-up Submission		NO	No	YES	NO	NA		NO		48	YES		12	8	NO	NA	0	NA	3	NA	No	M0	N1b	T3	4751	YES	TUMOR FREE	YES	4.2	YES		NO
TCGA-A6-6141-01A	31	123.74.0	Nationwide Children's Hospital	TCGA-A6-6141-F21471	f0900dfb-dfa3-4d5a-8233-cc0427052f6b	TCGA-A6-6141	NO		NA			22	13	0	D076A339-B729-498B-A285-A695D09A852D			YES	No	YES	NO	NA		YES		19	NO	NO	12	2	NO	0	0	5	0	NA	No	M0	N0	T3	6141		TUMOR FREE	YES	5	YES		NO
TCGA-NH-A50V-01A	69	300.56.0	Nationwide Children's Hospital	TCGA-NH-A50V-F50653	56B89B24-F861-46C9-9FAD-68D0AC29AB4A	TCGA-NH-A50V	NO		0.45	NO		22	28	0	70081354-83D9-433D-9036-5C2867D80B8F	Scheduled Follow-up Submission	Complete Remission/Response		No	YES	NO	NA		NO	NO	35	NO	NO	12	10	NO	NA	0	NA	4	0	No	M0	N2a	T3	A50V	NO	TUMOR FREE	YES	NA	YES	Complete Remission/Response	NO
TCGA-NH-A50V-01B	69	300.56.0	Nationwide Children's Hospital	TCGA-NH-A50V-F50653	56B89B24-F861-46C9-9FAD-68D0AC29AB4A	TCGA-NH-A50V	NO		0.45	NO		22	28	0	70081354-83D9-433D-9036-5C2867D80B8F	Scheduled Follow-up Submission	Complete Remission/Response		No	YES	NO	NA		NO	NO	35	NO	NO	12	10	NO	NA	0	NA	4	0	No	M0	N2a	T3	A50V	NO	TUMOR FREE	YES	NA	YES	Complete Remission/Response	NO
TCGA-AA-3980-01A	89	41.78.0	Nationwide Children's Hospital	TCGA-AA-3980-F37938	8E8D6FD6-0697-4F04-AB07-F2887AFE211E	TCGA-AA-3980	NO		NA			22	6	0	35986A00-1A7E-4408-88E0-966B4F7BB555	Scheduled Follow-up Submission	Complete Remission/Response	YES	No	YES	NO	NA		NO	NO	19	YES		12	12		NA	1	NA	0	NA	No	M0	N0	T2	3980		TUMOR FREE	NO	NA	YES	Complete Remission/Response	NO
TCGA-AA-3869-01A	76	41.78.0	Nationwide Children's Hospital	TCGA-AA-3869-F37989	A9036708-7CA4-4F63-B1B6-3A7C82C9FBC7	TCGA-AA-3869	NO		NA			22	8	0	A51217C3-9743-4F1E-96E1-BE456776625D	Scheduled Follow-up Submission	Partial Remission/Response	NO	No	YES	NO	NA		NO	NO	28	YES		12	12		NA	0	NA	14	NA	No	M1	N2	T4	3869		WITH TUMOR	YES	NA	YES	Partial Remission/Response	NO
TCGA-AA-3967-01A	77	45.80.0	Nationwide Children's Hospital	TCGA-AA-3967-F37952	641DCD68-3906-4437-9AD3-B08A5E91B4C3	TCGA-AA-3967	NO		NA			22	6	0	2B7B1853-D23E-42B5-80EA-69DAC5D34B5B	Scheduled Follow-up Submission	Complete Remission/Response	YES	No	YES	NO	NA		NO	NO	33	NO		12	12		NA	0	NA	2	NA	No	M0	N1	T3	3967		TUMOR FREE	YES	2.27	YES	Complete Remission/Response	NO
TCGA-AA-3848-01A	82	36.83.0	Nationwide Children's Hospital	TCGA-AA-3848-F38005	A9B405F7-95EE-42F4-91EE-4B56E948F007	TCGA-AA-3848	NO		NA			22	8	0	FB3D1892-6209-49D7-A9C9-936E558D641A	Scheduled Follow-up Submission		YES	No	YES	NO	NA		NO	NO	12	YES		12	12		NA	0	NA	6	NA	No	M0	N2	T3	3848			NO	NA	YES		NO
TCGA-NH-A6GC-01A	66	422.38.0	Nationwide Children's Hospital	TCGA-NH-A6GC-F60510	D2E1662D-2E0B-454F-A8F4-1B051D6DB387	TCGA-NH-A6GC	NO		1	NO		22	10	0	4E6B8DD9-2970-4D2C-8844-22773C7732E2	Scheduled Follow-up Submission			No	YES	YES	12	YES		NO	19	NO	NO	12	6	NO	NA	0	NA	3	NA	No	M1b	N1b	T4b	A6GC	NO		YES	NA	YES		NO
TCGA-NH-A6GC-06A	66	422.38.0	Nationwide Children's Hospital	TCGA-NH-A6GC-F60510	D2E1662D-2E0B-454F-A8F4-1B051D6DB387	TCGA-NH-A6GC	NO		1	NO		22	10	0	4E6B8DD9-2970-4D2C-8844-22773C7732E2	Scheduled Follow-up Submission			No	YES	YES	12	YES		NO	19	NO	NO	12	6	NO	NA	0	NA	3	NA	No	M1b	N1b	T4b	A6GC	NO		YES	NA	YES		NO
TCGA-AA-3660-01A	51	116.77.0	Nationwide Children's Hospital	TCGA-AA-3660-F37518	C344AAB6-3523-4FF6-8FC8-93DDCB53C432	TCGA-AA-3660	NO		NA			22	3	0	35F0DBC6-5E9D-4CD8-B251-51E77DC6EEDC	Scheduled Follow-up Submission	Complete Remission/Response	NO	No	YES	NO	NA		NO	NO	33	NO		12	12		NA	0	NA	0	NA	No	M0	N0	T3	3660		TUMOR FREE	NO	1.37	YES	Complete Remission/Response	NO
TCGA-DM-A288-01A	68	154.69.0	Nationwide Children's Hospital	TCGA-DM-A288-F19047	921EBAEF-985F-4EB0-9D2D-BA0DCA9B274E	TCGA-DM-A288	NO		NA			22	2	0	D80C2025-6608-49A4-8097-6070F6C38FC0	Scheduled Follow-up Submission		NO	No	YES	YES	13	YES			22	NO	NO	12	12		0	0	6	4	NA	No	M0	N2	T3	A288				NA	YES
TCGA-G4-6322-01A	65	116.77.0	Nationwide Children's Hospital	TCGA-G4-6322-F21960	b8500ee6-e106-4046-8c89-9ca1cab89d29	TCGA-G4-6322	NO		NA	YES		22	21	0	E45F7D6A-C996-43AB-8878-9A852524135F	Scheduled Follow-up Submission		NO	No	YES	NO	NA		NO		26	YES		12	2	NO	NA	0	NA	2	NA	No	MX	N1	T3	6322	NO	WITH TUMOR	YES	4.2	YES		NO
TCGA-AD-6888-01A	73	157.71.0	Nationwide Children's Hospital	TCGA-AD-6888-F37065	B32EF3E1-DAA3-4FEA-A05A-FDC5809D1030	TCGA-AD-6888	NO		90	YES		22	26	0	6F1D1E09-2B76-4D1C-A676-2C02B03DE871	Scheduled Follow-up Submission	Progressive Disease	YES	No	YES	NO	NA		NO	NO	18	YES		12	8	NO	NA	0	NA	2	0	Yes	M0	N1b	T3	6888	NO	WITH TUMOR	NO	NA	YES	Complete Remission/Response	NO
TCGA-AA-3520-01A	86	28.86.0	Nationwide Children's Hospital	TCGA-AA-3520-F37299	EB555C35-2840-4E84-A86F-BB59443F3866	TCGA-AA-3520	NO		NA			22	1	0	D6E03167-BFE3-4774-BB11-618356BA4422	Scheduled Follow-up Submission		YES	No	YES	NO	NA		NO	NO	20	NO		12	12		NA	0	NA	0	NA	Yes	M0	N0	T3	3520			NO	5.8	YES		NO
TCGA-A6-5659-01A	82	89.77.0	Nationwide Children's Hospital	TCGA-A6-5659-F12312	bf113369-ec1e-411d-bc5c-ade4f54e1811	TCGA-A6-5659	NO		NA	YES		22	26	0	DE620312-A5AE-468A-86FC-5EED29B91011			NO	No	YES	NO	NA				26	NO		12	5	NO	NA	0	NA	0	NA	No	M0	N0	T2	5659		TUMOR FREE	NO	2.9	YES		NO
TCGA-A6-5659-01B	82	89.77.0	Nationwide Children's Hospital	TCGA-A6-5659-F12312	bf113369-ec1e-411d-bc5c-ade4f54e1811	TCGA-A6-5659	NO		NA	YES		22	26	0	DE620312-A5AE-468A-86FC-5EED29B91011			NO	No	YES	NO	NA				26	NO		12	5	NO	NA	0	NA	0	NA	No	M0	N0	T2	5659		TUMOR FREE	NO	2.9	YES		NO
TCGA-A6-2676-01A	75	29.82.0	Nationwide Children's Hospital	TCGA-A6-2676-F2537	490b19ab-0230-4b0a-9e1d-86b78e119c9d	TCGA-A6-2676	NO		NA	NO		22	25	0	29296AB1-CF62-4378-B342-D3668A0C530B			NO	No	YES	NO	NA				15	NO		12	10	NO	NA	0	NA	0	NA	No	M0	N0	T4	2676		TUMOR FREE	YES	6.3	YES		NO
TCGA-AA-3815-01A	65	41.78.0	Nationwide Children's Hospital	TCGA-AA-3815-F38109	04BF5C9A-0596-4403-9951-FAD10EEBDE8D	TCGA-AA-3815	NO		NA			22	10	0	2D910627-C583-478D-B321-424784C5B137	Scheduled Follow-up Submission	Complete Remission/Response	NO	No	YES	NO	NA		NO	NO	20	YES		12	12		NA	1	NA	0	NA	No	M0	N0	T3	3815		TUMOR FREE	NO	0.82	YES	Complete Remission/Response	NO
TCGA-AA-A02W-01A	73	33.79.0	Nationwide Children's Hospital	TCGA-AA-A02W-F37279	5E1742B6-6CBD-4623-BA87-384CD18456D0	TCGA-AA-A02W	NO		NA			22	1	0	7A15EFEB-CED3-47D8-9134-57A8B4FF7C64	Scheduled Follow-up Submission	Complete Remission/Response	YES	No	YES	NO	NA		NO	NO	12			12	12		NA	0	NA	0	NA	No	M0	N0	T2	A02W		TUMOR FREE	NO	2.96	YES	Complete Remission/Response	NO
TCGA-A6-2680-01A	72	76.78.0	Nationwide Children's Hospital	TCGA-A6-2680-F6361	6dfe3224-f6e0-4833-bc4f-fe533978e474	TCGA-A6-2680	NO		NA	NO		22	19	0	A4D4C2D2-D205-4D06-AFEE-66DE3D7DDDE1				No	YES	NO	NA				34	NO		12	1	NO	NA	0	NA	0	NA	No	M0	N0	T3	2680		TUMOR FREE	NO	3.2	YES		NO
TCGA-AA-3692-01A	47	36.83.0	Nationwide Children's Hospital	TCGA-AA-3692-F38095	E980278C-4FF6-4B4B-B66D-CFABB2F7970E	TCGA-AA-3692	NO		NA			22	10	0	FBCFA125-E0E5-48B2-B2D3-3F4BAEC662CE	Scheduled Follow-up Submission	Progressive Disease	YES	No	YES	NO	NA		NO	NO	30	NO		12	12		NA	0	NA	5	NA	Yes	M1	N2	T3	3692		WITH TUMOR	YES	49.21	YES	Progressive Disease	YES
TCGA-D5-6931-01A	77	157.71.0	Nationwide Children's Hospital	TCGA-D5-6931-F29860	f6243a61-da18-4069-b6ea-1352e162e728	TCGA-D5-6931	NO		NA	NO		22	30	0	12E5EB61-45E0-4262-A374-839D6D1C76C4	Scheduled Follow-up Submission		NO	No	YES	NO	NA		NO		14	YES		12	3	NO	NA	NA	NA	4	NA	No	M0	N2	T4b	6931	YES	TUMOR FREE	NO	6.9	YES		NO
TCGA-AA-3552-01A	85	28.86.0	Nationwide Children's Hospital	TCGA-AA-3552-F37508	877C5351-9662-4840-846C-66D848A52F4C	TCGA-AA-3552	NO		NA			22	3	0	DE56D974-06EF-4AAD-8A6D-CB19E7A52D92	Scheduled Follow-up Submission	Complete Remission/Response	NO	No	YES	NO	NA		NO	NO	20	YES		12	12		NA	0	NA	10	NA	Yes	M0	N2	T3	3552		TUMOR FREE	NO	2.71	YES	Complete Remission/Response	NO
TCGA-A6-6650-01A	69	123.74.0	Nationwide Children's Hospital	TCGA-A6-6650-F18520	c0becc9e-7b2a-4c8a-905c-7cf38bf7dcac	TCGA-A6-6650	NO		NA	NO		22	18	0	76BFD3E3-0A99-46D0-B96D-F43CA647450C			NO	No	YES	NO	NA				19	NO		12	11	NO	NA	0	NA	0	NA	No	M0	N0	T3	6650		TUMOR FREE	NO	2.9	YES		NO
TCGA-A6-6650-01B	69	123.74.0	Nationwide Children's Hospital	TCGA-A6-6650-F18520	c0becc9e-7b2a-4c8a-905c-7cf38bf7dcac	TCGA-A6-6650	NO		NA	NO		22	18	0	76BFD3E3-0A99-46D0-B96D-F43CA647450C			NO	No	YES	NO	NA				19	NO		12	11	NO	NA	0	NA	0	NA	No	M0	N0	T3	6650		TUMOR FREE	NO	2.9	YES		NO
TCGA-D5-6539-01A	45	116.77.0	Nationwide Children's Hospital	TCGA-D5-6539-F28922	0d71e69a-dd69-4022-92fa-542c7818f224	TCGA-D5-6539	NO		NA			22	2	0	389167CC-B976-4B4B-9C03-8FD621D6AB69	Scheduled Follow-up Submission			No	YES	NO	NA				12	NO		12	3	NO	NA	NA	NA	0	NA	No	M0	N0	T3	6539	YES	TUMOR FREE	NO	1.1	YES		NO
TCGA-AA-3679-01A	59	36.83.0	Nationwide Children's Hospital	TCGA-AA-3679-F38086	59725454-43AB-4DD9-8AFA-20448C8C34B1	TCGA-AA-3679	NO		NA			22	10	0	CEACC0DD-DC50-4FBD-9454-2EAF3E603E47	Scheduled Follow-up Submission	Progressive Disease	NO	No	YES	NO	NA		NO	NO	12	YES		12	12		NA	0	NA	5	NA	No	M1	N2	T3	3679		WITH TUMOR	YES	25.78	YES	Progressive Disease	NO
TCGA-G4-6306-01A	71	123.74.0	Nationwide Children's Hospital	TCGA-G4-6306-F21445	c46277c9-79be-4a2a-9a00-542f8f9ccc9e	TCGA-G4-6306	NO		15	NO		22	23	0	37C888D6-84DB-4CAE-82E1-DA800AC47A8E	Scheduled Follow-up Submission		YES	No	YES	NO	NA		NO		17			12	1	NO	NA	1	NA	0	NA	No	M0	N0	T2	6306	NO	TUMOR FREE	NO	2.7	YES		NO
TCGA-AA-3673-01A	53	36.83.0	Nationwide Children's Hospital	TCGA-AA-3673-F37524	B4F44533-0295-4464-A514-C8DDBCC17BFA	TCGA-AA-3673	NO		NA			22	3	0	ABC3A5F9-FF32-4BE0-959E-99FDF4C26207	Scheduled Follow-up Submission	Complete Remission/Response	NO	No	YES	NO	NA		NO	NO	41	NO		12	12		NA	1	NA	0	NA	No	M0	N0	T3	3673		TUMOR FREE	NO	3.89	NO	Complete Remission/Response	NO
TCGA-CM-5863-01A	60	138.78.0	Nationwide Children's Hospital	TCGA-CM-5863-F14267	a8d0bbc6-dfa2-4f5d-befe-d6395ed24794	TCGA-CM-5863	NO		NA	NO		22	26	0	A321F822-D4F9-40F2-96C5-BEB1D7030BEE	Scheduled Follow-up Submission		NO	No	YES	NO	NA		NO		12	NO		12	7	YES	NA	0	NA	3	NA	No	M0	N1b	T3	5863	YES	TUMOR FREE	YES	4.7	YES		NO
TCGA-AA-3663-01A	42	116.77.0	Nationwide Children's Hospital	TCGA-AA-3663-F37520	F1363562-F9D2-4A2A-90C1-F05E28DC1D47	TCGA-AA-3663	NO		NA			22	3	0	398F79EE-801F-4FCA-B2FB-0427904C27EB	Scheduled Follow-up Submission	Complete Remission/Response	NO	No	YES	NO	NA		NO	NO	40	NO		12	12		NA	0	NA	0	NA	No	M0	N0	T3	3663		TUMOR FREE	NO	18.77	YES	Complete Remission/Response	NO
TCGA-AA-3986-01A	73	41.78.0	Nationwide Children's Hospital	TCGA-AA-3986-F37937	BCAAE367-C52E-4D07-8FB1-39952154FEA8	TCGA-AA-3986	NO		NA			22	6	0	CF2A45B6-676A-4A92-A1DC-60E0786CC732	Scheduled Follow-up Submission	Complete Remission/Response	YES	No	YES	NO	NA		NO	NO	27	NO		12	12		NA	0	NA	0	NA	Yes	M0	N0	T2	3986		TUMOR FREE	NO	1.89	YES	Complete Remission/Response	NO
TCGA-G4-6323-01A	50	116.77.0	Nationwide Children's Hospital	TCGA-G4-6323-F21889	d0240b51-d0a9-464c-896a-930684fdd57a	TCGA-G4-6323	NO		NA	NO		22	30	0	CD4EA537-FC24-47B6-A41E-962E4A964CAB	Scheduled Follow-up Submission		NO	No	YES	NO	NA		NO		24	NO		12	1	NO	NA	0	NA	0	NA	No	MX	N0	Tis	6323	NO	TUMOR FREE	NO	0.9	YES		NO
TCGA-F4-6703-01A	64	138.78.0	Nationwide Children's Hospital	TCGA-F4-6703-F39565	EBBC160F-A681-4D52-BA68-8A6D834C66E8	TCGA-F4-6703			NA	NO		22	25	0	9F4FFC11-C2E9-4CA2-8B07-97ADBFEC3B5E	Scheduled Follow-up Submission	Complete Remission/Response	NO	No	YES		NA			NO	12	NO		12	1	NO	NA	0	NA	0	NA	No	M0	N0	T3	6703	NO	TUMOR FREE	NO	NA	YES	Complete Remission/Response	NO
TCGA-AA-3695-01A	63	36.83.0	Nationwide Children's Hospital			TCGA-AA-3695	NO		NA			22	NA	0	9D8EC94B-97C1-4CE3-904F-8C68B5EEF3D3			YES	No	YES	NO	NA		NO		33	YES		12	NA		NA	0	NA	6	NA	No	M1	N2	T3	3695				NA	YES
TCGA-AA-3527-01A	90	28.86.0	Nationwide Children's Hospital			TCGA-AA-3527	NO		NA			22	NA	0	FE7C7DF7-F28F-4751-B509-9CD23EBDFDF5			YES	No	YES	NO	NA		NO		15	NO		12	NA		NA	0	NA	0	NA	Yes	M0	N0	T3	3527				4.72	YES
TCGA-AA-3976-01A	70	41.78.0	Nationwide Children's Hospital	TCGA-AA-3976-F37943	EF8165F7-3507-4141-9E35-BD662066009A	TCGA-AA-3976	NO		NA			22	6	0	797C5F25-499E-4302-9C08-E97B46E5E589	Scheduled Follow-up Submission	Complete Remission/Response	NO	No	YES	NO	NA		NO	NO	16			12	12		NA	0	NA	2	NA	Yes	M0	N1	T2	3976			YES	NA	YES	Complete Remission/Response	NO
TCGA-G4-6302-01A	90	116.77.0	Nationwide Children's Hospital	TCGA-G4-6302-F21446	14156fbf-46da-4770-b3c6-6409bba1da9e	TCGA-G4-6302	NO		1	YES		22	20	0	58D10F92-7B3D-4603-A4FC-B63318B40B2D	Scheduled Follow-up Submission		NO	No	YES	NO	NA		NO		15	YES		12	1	NO	NA	0	NA	0	NA	No	M0	N0	T3	6302	YES	TUMOR FREE	NO	NA	YES		NO
TCGA-AY-6386-01A	66	116.77.0	Nationwide Children's Hospital	TCGA-AY-6386-F21744	e09f8b62-6bec-42ff-9f44-7c287ab2d81a	TCGA-AY-6386	NO		NA	YES		22	20	0	AFFB1E65-7942-4F12-A854-C9D11D4DFD7B			NO	No	YES	NO	NA		NO		19	NO	NO	12	2	NO	NA	0	NA	1	NA	No	M0	N1a	T3	6386	NO	TUMOR FREE	YES	1.3	YES		NO
TCGA-QG-A5Z1-01A	71	300.56.0	Nationwide Children's Hospital	TCGA-QG-A5Z1-F57368	33F88B72-AAB9-4040-8E56-81025767EE53	TCGA-QG-A5Z1	NO		5	NO		22	18	0	4B036983-FA40-40ED-B5BD-996FFD198712	Scheduled Follow-up Submission		NO	No	YES	NO	NA		NO	NO	38	YES		12	4		NA	0	NA	3	NA	No	MX	N1b	T3	A5Z1	YES		NO	5.3	YES		NO
TCGA-A6-2670-01A	45	28.80.0	Nationwide Children's Hospital	TCGA-A6-2670-F4954	A927ECD1-B95E-41F6-8CB3-DCD75560C009	TCGA-A6-2670	NO		NA	NO	2011-04-19-04:00	17	19	0	9b816ff5-bac9-4f59-9d85-02b3ce44de03			YES	No	YES	NO	NA		NO		22	NO		12	10	NO	NA	0	NA	NA	NA	No	M0	N0	T3	2670			NO	NA	YES		NO	Subject withdrew consent
TCGA-G4-6628-01A	78	138.78.0	Nationwide Children's Hospital	TCGA-G4-6628-F21870	423dcf39-cb1b-4698-87a8-1a3d818145cf	TCGA-G4-6628	NO		NA	YES		22	7	0	59491CD2-5BD1-436E-96FF-4888990B47EF	Scheduled Follow-up Submission		NO	No	YES	NO	NA		NO		16	NO		12	2	NO	NA	0	NA	0	NA	Yes	M0	N0	T2	6628	NO	TUMOR FREE	NO	2.1	YES		NO
TCGA-AA-3529-01A	78	28.86.0	Nationwide Children's Hospital			TCGA-AA-3529	NO		NA			22	NA	0	E6CD0A17-21BC-483F-9C8F-422E2D15FE01			NO	No	YES	NO	NA		NO		34	YES		12	NA		NA	0	NA	10	NA	No	M0	N2	T3	3529				17.3	YES
TCGA-AA-3543-01A	84	29.82.0	Nationwide Children's Hospital	TCGA-AA-3543-F37502	626FFFA0-E469-49F8-A680-86BCBF2AA13D	TCGA-AA-3543	NO		NA			22	3	0	8FA3EF42-4A2E-43E8-AE02-147012A5BD9D	Scheduled Follow-up Submission		YES	Yes	YES	NO	NA		NO	NO	25	NO		12	12		NA	0	NA	0	NA	Yes	M0	N0	T2	3543		TUMOR FREE	NO	0.81	YES		NO
TCGA-AA-3492-01A	90	76.78.0	Nationwide Children's Hospital	TCGA-AA-3492-F37295	B2E5C2D6-8729-4BDB-951B-57A6B35C799D	TCGA-AA-3492	NO		NA			22	1	0	B4260556-2FDF-4739-972B-7FCBC9764E4E	Scheduled Follow-up Submission		NO	No	YES	NO	NA		NO	NO	21	NO		12	12		NA	0	NA	0	NA	No	M0	N0	T3	3492		TUMOR FREE	NO	NA	YES		NO
TCGA-AY-6197-01A	60	116.77.0	Nationwide Children's Hospital	TCGA-AY-6197-F21743	b801b588-c3a7-4427-a746-a639eb95a134	TCGA-AY-6197	NO		NA	NO		22	20	0	E3C53A6A-867F-4B16-B66A-E6B15D72DB80			NO	No	YES	NO	NA		YES		16	NO	YES	12	2	NO	4	0	5	0	NA	No		N0	T3	6197	NO	TUMOR FREE	NO	NA	YES		NO
TCGA-CA-5797-01A	56	89.77.0	Nationwide Children's Hospital	TCGA-CA-5797-F20282	88e5623d-a3a5-45bd-8467-3e0afa361cb6	TCGA-CA-5797			NA			22	9	0	FCB31FE6-A2D6-4F30-A21C-37DF6009C4D7				No	YES		NA				NA			12	1		NA	NA	NA	NA	NA	No	M0	N0	T3	5797		TUMOR FREE	YES	NA	NO		NO
TCGA-AA-3941-01A	84	41.78.0	Nationwide Children's Hospital	TCGA-AA-3941-F37983	6CC1236D-57B5-4C61-AD13-DFDAFBAF19F0	TCGA-AA-3941	NO		NA			22	8	0	4ED5A84B-7EC6-4891-A417-91E4B7F52522	Scheduled Follow-up Submission		NO	No	YES	NO	NA		NO	NO	41	YES		12	12		NA	0	NA	3	NA	No	M1a	N1b	T4	3941			NO	NA	YES		NO
TCGA-CM-4748-01A	53	76.78.0	Nationwide Children's Hospital	TCGA-CM-4748-F5913	002365d7-6ffd-45ae-9564-8c0374075959	TCGA-CM-4748	NO		NA	NO		22	10	0	4ACAEE87-93CE-418B-9FF3-D693A8ED57F7			YES	No	YES	NO	NA		YES		23	YES		12	1	YES	NA	0	NA	1	NA	No	M0	N1a	T4a	4748	NO	TUMOR FREE	YES	2	YES		NO
TCGA-AA-A004-01A	76	33.79.0	Nationwide Children's Hospital	TCGA-AA-A004-F37918	F6D48268-49CF-448F-90C9-9B97ADB1FEF4	TCGA-AA-A004	NO		NA			22	6	0	8C0D3C3B-A491-48DB-823A-2EB58D378468	Scheduled Follow-up Submission	Complete Remission/Response	YES	No	YES	NO	NA		NO	NO	32	NO		12	12		NA	0	NA	0	NA	No	M0	N0	T3	A004		TUMOR FREE	NO	NA	YES	Complete Remission/Response	NO
TCGA-A6-3809-01A	71	41.78.0	Nationwide Children's Hospital	TCGA-A6-3809-F2573	c8e553a4-b76e-48a2-9de6-8e88babbf880	TCGA-A6-3809	NO		NA	YES		22	29	0	98AEE28B-E618-4751-81CC-5F486D3AE369			NO	No	YES	NO	NA		NO		24	NO	YES	12	10	NO	5	1	5	0	NA	No	M0	N0	T4	3809		TUMOR FREE	NO	NA	YES		NO
TCGA-A6-3809-01B	71	41.78.0	Nationwide Children's Hospital	TCGA-A6-3809-F2573	c8e553a4-b76e-48a2-9de6-8e88babbf880	TCGA-A6-3809	NO		NA	YES		22	29	0	98AEE28B-E618-4751-81CC-5F486D3AE369			NO	No	YES	NO	NA		NO		24	NO	YES	12	10	NO	5	1	5	0	NA	No	M0	N0	T4	3809		TUMOR FREE	NO	NA	YES		NO
TCGA-AA-3984-01A	61	41.78.0	Nationwide Children's Hospital			TCGA-AA-3984	NO		NA			22	NA	0	958FEAD7-D6FD-451F-ADC2-D84083AFA7D7			YES	No	YES	NO	NA		NO		12	YES		12	NA		NA	0	NA	0	NA	No	M0	N0	T3	3984				NA	YES
TCGA-A6-2677-01A	68	28.86.0	Nationwide Children's Hospital	TCGA-A6-2677-F2506	52bd140c-7803-4ae0-af1b-98be72f3af5b	TCGA-A6-2677	NO		NA	NO		22	22	0	D7BA6D97-E637-4E0B-A331-FF4DF25BFF21			NO	No	YES	NO	NA				30	YES		12	10	NO	NA	2	NA	5	NA	Yes	M0	N2	T3	2677		TUMOR FREE	YES	27.4	YES		NO
TCGA-A6-2677-01B	68	28.86.0	Nationwide Children's Hospital	TCGA-A6-2677-F2506	52bd140c-7803-4ae0-af1b-98be72f3af5b	TCGA-A6-2677	NO		NA	NO		22	22	0	D7BA6D97-E637-4E0B-A331-FF4DF25BFF21			NO	No	YES	NO	NA				30	YES		12	10	NO	NA	2	NA	5	NA	Yes	M0	N2	T3	2677		TUMOR FREE	YES	27.4	YES		NO
TCGA-AA-3712-01A	65	116.77.0	Nationwide Children's Hospital			TCGA-AA-3712	NO		NA			22	NA	0	14F00673-AFEA-4038-A086-145E0049FA0F			NO	No	YES	NO	NA		NO		18	YES		12	NA		NA	0	NA	12	NA	No	M0	N2	T3	3712				0.88	YES
TCGA-D5-6924-01A	68	157.71.0	Nationwide Children's Hospital	TCGA-D5-6924-F29901	f5daaff5-f2bc-42ab-9bda-53dcf1a305d0	TCGA-D5-6924	NO		NA	NO		22	30	0	2D666229-F339-43C4-ADF4-6E0EAADDC9B2	Scheduled Follow-up Submission		NO	No	YES	NO	NA		NO		8	NO	NO	12	3	NO	NA	0	NA	0	NA	No	M0	N0	T3	6924	NO	TUMOR FREE	NO	3.1	YES		NO
TCGA-AA-3831-01A	66	36.83.0	Nationwide Children's Hospital	TCGA-AA-3831-F38113	D7BE3EE5-2807-49CC-8466-CD1AEE337AC4	TCGA-AA-3831	NO		NA			22	10	0	90817438-2C89-4827-AAC0-ECBC2B4632B7	Scheduled Follow-up Submission	Complete Remission/Response	NO	No	YES	NO	NA		NO	NO	12	YES		12	12		NA	0	NA	0	NA	No	M0	N0	T3	3831		TUMOR FREE	NO	NA	YES	Complete Remission/Response	NO
TCGA-CM-5349-01A	68	116.77.0	Nationwide Children's Hospital	TCGA-CM-5349-F11076	643ee454-daf7-4df4-86b6-53a9e9417a84	TCGA-CM-5349	NO		NA	NO		22	3	0	5683590F-7BAC-42D1-AE64-F39A8F4088DF			NO	No	YES	NO	NA		YES		21	NO		12	5	NO	NA	0	NA	0	NA	No	M0	N0	T3	5349	NO	TUMOR FREE	NO	3	YES		NO
TCGA-G4-6295-01A	70	116.77.0	Nationwide Children's Hospital	TCGA-G4-6295-F21796	98402fef-6ffb-4a00-93a5-76e4ed148257	TCGA-G4-6295	NO		NA	YES		22	19	0	C4946EAE-5616-4A0C-816F-5E044A00D9D6	Scheduled Follow-up Submission		NO	No	YES	NO	NA		NO		23	NO	NO	12	1	NO	NA	0	NA	0	NA	No	M0	N0	T3	6295	NO	TUMOR FREE	NO	NA	YES		NO
TCGA-AA-3544-01A	68	28.86.0	Nationwide Children's Hospital	TCGA-AA-3544-F37505	8575946B-7CD5-4A0B-A749-83C08F057172	TCGA-AA-3544	NO		NA			22	3	0	52DC4744-4E87-476F-9C98-608BB76CA62D	Scheduled Follow-up Submission	Complete Remission/Response	NO	No	YES	NO	NA		NO	NO	21	NO		12	12		NA	0	NA	0	NA	No	M0	N0	T2	3544		TUMOR FREE	NO	0.39	YES	Complete Remission/Response	NO
TCGA-AD-6964-01A	58	157.71.0	Nationwide Children's Hospital	TCGA-AD-6964-F47088	185C7219-945C-44E9-8726-B8E986FB2145	TCGA-AD-6964	YES	Normal	0	NO		22	22	0	3107D1AE-F8A1-41F8-B600-A28DE0191ED3	Scheduled Follow-up Submission	Progressive Disease	NO	No	YES	NO	NA		YES	NO	16	YES	NO	12	8	YES	NA	1	NA	0	9	Yes		N2b	T4a	6964		WITH TUMOR	YES	NA	YES	Progressive Disease	NO
TCGA-CM-4752-01A	58	76.78.0	Nationwide Children's Hospital	TCGA-CM-4752-F5918	64dcc7e8-772a-4454-8875-9a2a1a3a49d2	TCGA-CM-4752	NO		NA	NO		22	10	0	89E0114D-4BFE-4736-AC33-918C0F9A7F8F			YES	No	YES	NO	NA		NO		23	NO		12	1	NO	NA	0	NA	0	NA	No	M0	N0	T3	4752	YES	TUMOR FREE	NO	2.2	YES		NO
TCGA-A6-2674-01A	71	28.86.0	Nationwide Children's Hospital	TCGA-A6-2674-F4946	a2a687ff-5106-4f42-938f-0d2da5d374d9	TCGA-A6-2674	NO		NA	NO		22	15	0	0CA9A3DC-D96E-4EA9-B42B-A052BA235679			NO	No	YES	NO	NA				20	NO		12	10	YES	NA	0	NA	7	0	No	M1	N2	T3	2674		TUMOR FREE	YES	32.8	YES		NO
TCGA-A6-2674-01B	71	28.86.0	Nationwide Children's Hospital	TCGA-A6-2674-F4946	a2a687ff-5106-4f42-938f-0d2da5d374d9	TCGA-A6-2674	NO		NA	NO		22	15	0	0CA9A3DC-D96E-4EA9-B42B-A052BA235679			NO	No	YES	NO	NA				20	NO		12	10	YES	NA	0	NA	7	0	No	M1	N2	T3	2674		TUMOR FREE	YES	32.8	YES		NO
TCGA-F4-6855-01A	70	157.71.0	Nationwide Children's Hospital	TCGA-F4-6855-F39564	210DE0FD-8EA9-40C1-B50C-35FF6A92355D	TCGA-F4-6855			NA	NO		22	25	0	E099EF6F-BEA3-41D9-8382-DEC8D305C4EE	Scheduled Follow-up Submission	Complete Remission/Response		No	YES		NA			NO	12	NO		12	1	NO	NA	0	NA	0	NA	No	M0	N0	T3	6855	NO	TUMOR FREE	NO	NA	YES	Complete Remission/Response	NO
TCGA-A6-5664-01A	80	138.78.0	Nationwide Children's Hospital	TCGA-A6-5664-F15773	1a788873-317a-4b1c-902b-33fdd6561dba	TCGA-A6-5664	NO		NA	YES		22	31	0	97A84A19-32D3-447D-BB35-947F38E79BD4			YES	No	YES	NO	NA		YES		18	YES	NO	12	8	YES	0	0	5	5	NA	No	MX	N2a	T4a	5664		WITH TUMOR	NO	17.4	YES		NO
TCGA-AA-3842-01A	51	41.78.0	Nationwide Children's Hospital	TCGA-AA-3842-F38229	3D95E78B-2025-41B4-B8CA-F463B4644D6C	TCGA-AA-3842	NO		NA			22	11	0	C807C424-9DA4-46CF-A5AC-7A1B168D43DB	Scheduled Follow-up Submission	Complete Remission/Response	YES	No	YES	NO	NA		NO	NO	12	YES		12	12		NA	0	NA	2	NA	No	M0	N1	T2	3842		TUMOR FREE	YES	NA	YES	Complete Remission/Response	NO
TCGA-AA-3833-01A	63	36.83.0	Nationwide Children's Hospital	TCGA-AA-3833-F38114	EBDEE7A5-CF60-4FBC-84B0-6AAD6A6914E7	TCGA-AA-3833	NO		NA			22	10	0	D886192B-AD35-400E-A434-AEFAA0C8F3EE	Scheduled Follow-up Submission	Complete Remission/Response	YES	No	YES	NO	NA		NO	NO	12	YES		12	12		NA	0	NA	0	NA	No	M0	N0	T3	3833		TUMOR FREE	NO	NA	YES	Complete Remission/Response	NO
TCGA-CM-6677-01A	75	138.78.0	Nationwide Children's Hospital	TCGA-CM-6677-F15655	aed45a05-326d-4ef3-9ff8-8aa0ff710903	TCGA-CM-6677	NO		NA	YES		22	NA	0	C9880ED7-FB38-4AC1-AD79-51D677572697	Scheduled Follow-up Submission		NO	No	YES	NO	NA		NO		20	NO		12	8	NO	NA	0	NA	0	NA	No	M0	N0	T3	6677	NO	TUMOR FREE	NO	3.7	YES		NO
TCGA-CA-6719-01A	77	138.78.0	Nationwide Children's Hospital	TCGA-CA-6719-F70853	F82DDDBD-3E83-4D29-96E3-FA35360E29E1	TCGA-CA-6719			NA			22	10	0	2240B24C-7802-444F-8912-31DCB63AD71C	Scheduled Follow-up Submission	Progressive Disease		No	YES		NA			NO	NA			12	3		NA	NA	NA	NA	NA	No	M0	N0	T3	6719		WITH TUMOR	NO	NA	NO	Progressive Disease	NO
TCGA-AA-3713-01A	68	116.77.0	Nationwide Children's Hospital	TCGA-AA-3713-F38102	2EB4E61D-7410-424A-8F8C-6E1AF49CE27E	TCGA-AA-3713			NA			22	10	0	C46013B0-19C5-46DD-B099-1141FF36D439	Scheduled Follow-up Submission	Partial Remission/Response	YES	No	YES	NO	NA		NO	NO	15			12	12		NA	0	NA	0	NA	Yes	M1	N0	T3	3713		TUMOR FREE	YES	83.68	YES	Partial Remission/Response	YES
TCGA-DM-A28H-01A	50	154.69.0	Nationwide Children's Hospital	TCGA-DM-A28H-F19042	9364276D-F763-4A86-BD7A-BBF10B1523DB	TCGA-DM-A28H	YES	Normal	NA			22	5	0	3E0115D6-4A1F-4E66-9CF0-EE35AC4E45DD	Scheduled Follow-up Submission		NO	No	YES	YES	NA	NO			12	NO	NO	12	12		1	0	6	8	NA	No	M0	N2	T3	A28H				NA	YES
TCGA-D5-6538-01A	79	116.77.0	Nationwide Children's Hospital	TCGA-D5-6538-F28624	798baee4-cda2-479c-ac27-f84845d43d2d	TCGA-D5-6538			NA	NO		22	27	0	E5469655-F16F-489F-A6B0-E45433B89506	Scheduled Follow-up Submission		NO	No	YES	NO	NA		NO		14	NO		12	2	NO	NA	NA	NA	10	0	No	M0	N2	T3	6538	NO	TUMOR FREE	YES	23.5	YES		NO
TCGA-A6-A565-01A	34	300.56.0	Nationwide Children's Hospital	TCGA-A6-A565-F42133	FE61AD85-7191-41E6-A1C8-607C0EBBB29F	TCGA-A6-A565			NA	YES		22	12	0	AD1B8A8F-D114-40DD-871A-7947B764EBAD	Additional New Tumor Event	Progressive Disease	NO	No	YES	YES	NA			NO	41	YES		12	4	YES	NA	0	NA	13	NA	No	MX	N2	T3	A565		WITH TUMOR	YES	71.5	YES	Progressive Disease	NO
TCGA-F4-6808-01A	54	138.78.0	Nationwide Children's Hospital	TCGA-F4-6808-F35403	8E64F2AF-6776-479E-9EE3-7FBA9B924E6E	TCGA-F4-6808	NO		NA	NO		22	26	0	1C23378C-01EE-4E57-B647-15B3F53A819D	Scheduled Follow-up Submission	Complete Remission/Response	NO	No	YES	NO	NA		NO	NO	3	NO	NO	12	9	NO	0	NA	0	0	0	No	M0	N0	T1	6808	NO	TUMOR FREE	NO	NA	YES	Complete Remission/Response	NO
TCGA-CK-4948-01B	45	89.77.0	Nationwide Children's Hospital	TCGA-CK-4948-F9692	8a9a7c16-4f87-48f4-941b-fd7e4b50c299	TCGA-CK-4948	NO		1	NO		22	31	0	4422EF5B-48B2-47C6-BC7A-441B9C13528B			NO	No	YES	NO	NA		NO		20		NO	12	3	YES	0	NA	10	3	0	No	M0	N1	T3	4948		TUMOR FREE	NO	1.2	YES		NO
TCGA-AA-A029-01A	67	33.79.0	Nationwide Children's Hospital	TCGA-AA-A029-F37286	F6105D3D-79F1-41B3-B0BB-F3B4365BCD2B	TCGA-AA-A029	NO		NA			22	1	0	D6632810-C957-4ECA-AA91-8DA30D6DBDE7	Scheduled Follow-up Submission	Complete Remission/Response	YES	No	YES	NO	NA		NO	NO	27			12	12		NA	0	NA	0	NA	No	M0	N0	T3	A029		TUMOR FREE	NO	1.97	YES	Complete Remission/Response	NO
TCGA-AA-3524-01A	85	28.86.0	Nationwide Children's Hospital	TCGA-AA-3524-F37304	5B501504-C513-4987-909E-E7449DB244C4	TCGA-AA-3524	NO		NA			22	1	0	D3108AA7-F169-49D3-AC4D-FE0BA8A7762C	Scheduled Follow-up Submission	Complete Remission/Response	YES	No	YES	NO	NA		NO	NO	28	NO		12	12		NA	0	NA	0	NA	Yes	M0	N0	T3	3524		TUMOR FREE	NO	1.3	YES	Complete Remission/Response	NO
TCGA-WS-AB45-01A	52	422.38.0	Nationwide Children's Hospital	TCGA-WS-AB45-F66635	3963FADD-C5DA-4112-8E8B-9D7C80318C3D	TCGA-WS-AB45			0.05	NO		22	21	0	8F7FB491-ADC5-4C55-A42E-C514040AAA7D	Scheduled Follow-up Submission	Complete Remission/Response	YES	No	YES		NA		YES	NO	13	NO		12	10		NA	0	NA	0	0	No	MX	N0	T3	AB45	NO	TUMOR FREE	NO	NA	YES	Complete Remission/Response	NO
TCGA-F4-6856-01A	45	157.71.0	Nationwide Children's Hospital	TCGA-F4-6856-F36394	A8563485-6578-4A8D-A92E-48CACE79CD08	TCGA-F4-6856	NO		NA			22	30	0	1BF718B3-9C90-49EF-B6E4-0EAADDA717B8	Scheduled Follow-up Submission	Complete Remission/Response		No	YES	NO	NA			NO	21	NO		12	10	NO	NA	0	NA	0	0	No	M0	N0	T2	6856	NO	TUMOR FREE	YES	NA	YES	Complete Remission/Response	NO
TCGA-CK-4947-01B	46	89.77.0	Nationwide Children's Hospital	TCGA-CK-4947-F9794	dccfb70e-98e2-44e0-b30c-c8fb98e6568a	TCGA-CK-4947	NO		NA	NO		22	31	0	180A0334-3648-4B25-AC22-6B0AF5960ADE			NO	No	YES	NO	NA				12			12	3	NO	NA	NA	NA	3	0	No	M0	N1	T4	4947		WITH TUMOR	NO	2.5	YES		NO
TCGA-AA-3556-01A	78	28.86.0	Nationwide Children's Hospital	TCGA-AA-3556-F37512	C9594DA2-4604-4F06-BFB6-5AD600AB26ED	TCGA-AA-3556	NO		NA			22	3	0	5E5173E6-1871-4BEF-AB26-5C5AD68F7D41	Scheduled Follow-up Submission		YES	No	YES	NO	NA		NO	NO	22	NO		12	12		NA	0	NA	0	NA	Yes	M0	N0	T2	3556			NO	NA	YES		NO
TCGA-AA-A00A-01A	80	30.80.0	Nationwide Children's Hospital	TCGA-AA-A00A-F37921	4274FADE-C589-4BCE-B8FB-07317015B2A9	TCGA-AA-A00A	NO		NA			22	6	0	98C92EC8-5A64-4E87-BB20-CC9E57AEA7C5	Scheduled Follow-up Submission		NO	No	YES	NO	NA		NO	NO	34	NO		12	12		NA	0	NA	0	NA	No	M0	N0	T3	A00A			NO	NA	YES		NO
TCGA-AA-A00L-01A	66	30.80.0	Nationwide Children's Hospital	TCGA-AA-A00L-F37320	98A32611-7271-4A70-A38A-74BC81F2C611	TCGA-AA-A00L	NO		NA			22	1	0	8BAFFC70-CB1E-4470-999E-C283791999A4	Scheduled Follow-up Submission	Complete Remission/Response	YES	No	YES	NO	NA		NO	NO	32	NO		12	12		NA	0	NA	0	NA	Yes	M0	N0	T3	A00L		TUMOR FREE	NO	NA	YES	Complete Remission/Response	NO
TCGA-AZ-6603-01A	77	138.78.0	Nationwide Children's Hospital	TCGA-AZ-6603-F34153	E2EE8BA9-6429-4858-B328-FF367A87CF95	TCGA-AZ-6603			NA			22	31	0	3B0099C1-EFE4-4CC8-83FF-1688D4A2C0CD	Scheduled Follow-up Submission	Complete Remission/Response		No	YES		NA			NO	3	NO		12	7		NA	NA	NA	0	NA	No	MX	N1	T2	6603	NO	TUMOR FREE	NO	NA	YES	Complete Remission/Response	NO
TCGA-AZ-4681-01A	79	76.78.0	Nationwide Children's Hospital	TCGA-AZ-4681-F19859	e199bddc-959b-4ea9-940c-8821d948850f	TCGA-AZ-4681			NA	YES		22	30	0	F666D81D-23B3-4CA3-B52A-005572F96F84				No	YES		NA				NA			12	12	YES	NA	1	NA	NA	NA	No	M0	N0	T3	4681		TUMOR FREE	NO	15.1			NO
TCGA-AA-3956-01A	65	41.78.0	Nationwide Children's Hospital	TCGA-AA-3956-F37978	8423C589-DAD2-4222-AD99-BA5A1FD92075	TCGA-AA-3956	NO		NA			22	8	0	E363C039-928D-4F28-B2D8-5A269671B2F0	Scheduled Follow-up Submission		YES	No	YES	NO	NA		NO	NO	36	NO		12	12		NA	0	NA	0	NA	No	M0	N0	T3	3956			NO	3.5	YES		NO
TCGA-DM-A1D4-01A	80	132.71.0	Nationwide Children's Hospital	TCGA-DM-A1D4-F19037	0C2A00EB-52A7-4024-A2C8-BB758E75ACD0	TCGA-DM-A1D4	YES	Normal	NA			22	2	0	0CA4780E-3637-418E-A249-19693DE5CB7B	Scheduled Follow-up Submission			No	YES	NO	NA				15	NO	NO	12	12		0	0	5	0	NA	No	M0	N0	T3	A1D4				NA	YES
TCGA-AA-3966-01A	89	45.80.0	Nationwide Children's Hospital			TCGA-AA-3966	NO		NA			22	NA	0	4481764D-B6A1-4FF6-9DA8-E519A6825876			YES	No	YES	NO	NA		NO		14	YES		12	NA		NA	0	NA	0	NA	No	M0	N0	T3	3966				NA	YES
TCGA-AZ-4323-01A	37	138.78.0	Nationwide Children's Hospital	TCGA-AZ-4323-F19855	d48d2369-d5d1-43a9-bc42-08696d05ce5e	TCGA-AZ-4323			NA			22	29	0	7A6143FD-F072-4DEE-9DF9-EEC89AF38748				No	YES		NA				30			12	12		NA	NA	NA	5	NA	No	M1	N2	T4	4323		WITH TUMOR	YES	NA	YES		NO
TCGA-A6-A56B-01A	57	300.56.0	Nationwide Children's Hospital	TCGA-A6-A56B-F45684	9057886A-BF48-4C84-BAA1-32D272E06D4D	TCGA-A6-A56B	NO		15	YES		22	22	0	879316C9-2D16-4496-84CD-CFC6A08807A3	Additional New Tumor Event		NO	No	YES	YES	NA			NO	25	YES		12	7	NO	NA	0	NA	3	NA	No	M0	N1	T3	A56B		TUMOR FREE	YES	13.2	YES	Complete Remission/Response	NO
TCGA-D5-6541-01A	49	116.77.0	Nationwide Children's Hospital	TCGA-D5-6541-F28627	51177e35-3947-4f3c-88dc-2dbbfc7835c3	TCGA-D5-6541	NO		30			22	27	0	498E643C-4D1F-458E-BBD4-DDBD8BDC3AEB	Scheduled Follow-up Submission			No	YES	NO	NA		NO		13	NO		12	2	NO	NA	NA	NA	0	0	No	M0	N0	T3	6541	NO	TUMOR FREE	NO	2	YES		NO
TCGA-5M-AAT5-01A	NA	422.38.0	Nationwide Children's Hospital			TCGA-5M-AAT5			NA			1	NA	NA	2315A3D7-32E2-42B3-A2DA-7075F90529F6							NA				NA			7	NA		NA	NA	NA	NA	NA					AAT5				NA
TCGA-5M-AATA-01A	NA	422.38.0	Nationwide Children's Hospital			TCGA-5M-AATA			NA			1	NA	NA	15BB0FA3-D688-4BB4-9538-8EF351D5498E							NA				NA			7	NA		NA	NA	NA	NA	NA					AATA				NA
[truncated: 70 more columns]

## Sheet: GSE28722
	title	geo_accession	status	submission_date	last_update_date	type	channel_count	source_name_ch1	organism_ch1	characteristics_ch1	molecule_ch1	extract_protocol_ch1	label_ch1	label_protocol_ch1	taxid_ch1	source_name_ch2	organism_ch2	characteristics_ch2	characteristics_ch2.1	characteristics_ch2.2	characteristics_ch2.3	characteristics_ch2.4	characteristics_ch2.5	characteristics_ch2.6	characteristics_ch2.7	characteristics_ch2.8	molecule_ch2	extract_protocol_ch2	label_ch2	label_protocol_ch2	taxid_ch2	hyb_protocol	scan_protocol	description	data_processing	platform_id	contact_name	contact_department	contact_institute	contact_address	contact_city	contact_state	contact_zip/postal_code	contact_country	supplementary_file	supplementary_file.1	data_row_count	age at diagnosis:ch2	duke's stage:ch2
GSM711483	colon carcinoma_3239	GSM711483	Public on Apr 25 2011	Apr 19 2011	Apr 25 2011	RNA	2	pool of individual tumors	Homo sapiens	sample type: reference	total RNA	Total RNA was isolated from the adipose samples by Qiagen RNeasy spin columns with DNAse treatment. 2 纰実 of each sample was precipitated in ethanol and re-suspended in 14 纰宭 of water. Globin mitigation performed using Ambion's GLOBINclear kit (cat# AM1	Cy3	Custom automated version of the aminoallyl MessageAmp II kit from Ambion	9606	colon carcinoma_3239	Homo sapiens	Stage: 1	overall survival (years): 7.25	overall survival censor (1-censored,0-non-censored): 1	metastasis (1-yes, 0-no): 0	time to metastasis (years): N/A	time to recurrence (years): 7.25	age at diagnosis: 80	tumor location: sigmoid	duke's stage: B	total RNA	Total RNA was isolated from the adipose samples by Qiagen RNeasy spin columns with DNAse treatment. 2 纰実 of each sample was precipitated in ethanol and re-suspended in 14 纰宭 of water. Globin mitigation performed using Ambion's GLOBINclear kit (cat# AM1	Cy5	Custom automated version of the aminoallyl MessageAmp II kit from Ambion	9606	Microarrays are incubated at 40鎺矯 for 48 hours in a rotating carousel. Hybridizations to custom Agilent microarrays are completed as previously described (Hughes et al.Nat Biotech (2001), 19(4):342-7). Microarrays are washed to remove non-specific hybrid	Microarrays are scanned using the Agilent LP2 laser scanner. The scanner output is a Tiff file, which contains the quantitative hybridization data from each individual microarray. The Tiff files are then processed using Rosetta custom feature extraction s	human colorectal tumor RNA	Data were processed using the Rosetta Resolver搴?system. Rosetta's custom feature extraction software performs error modeling before data are loaded into the Resolver system. The Resolver system performs a squeeze operation that combines replicates of the	GPL13425	Michael,,Nebozhyn	GpGx/Computational System biology	Merck, Inc	Mail Stop WP53B-120, 770 Sumneytown Pike, Building 53, P.O. Box 4	West Point	PA	19486	USA	ftp://ftp.ncbi.nlm.nih.gov/geo/samples/GSM711nnn/GSM711483/suppl/GSM711483_16011454043041_1_1.txt.gz	ftp://ftp.ncbi.nlm.nih.gov/geo/samples/GSM711nnn/GSM711483/suppl/GSM711483_16011454043042_1_1.txt.gz	23698	80	B
GSM711484	colon carcinoma_3198	GSM711484	Public on Apr 25 2011	Apr 19 2011	Apr 25 2011	RNA	2	pool of individual tumors	Homo sapiens	sample type: reference	total RNA	Total RNA was isolated from the adipose samples by Qiagen RNeasy spin columns with DNAse treatment. 2 纰実 of each sample was precipitated in ethanol and re-suspended in 14 纰宭 of water. Globin mitigation performed using Ambion's GLOBINclear kit (cat# AM1	Cy3	Custom automated version of the aminoallyl MessageAmp II kit from Ambion	9606	colon carcinoma_3198	Homo sapiens	Stage: 2	overall survival (years): 12.33	overall survival censor (1-censored,0-non-censored): 0	metastasis (1-yes, 0-no): 0	time to metastasis (years): N/A	time to recurrence (years): 12.33	age at diagnosis: 60	tumor location: ascend	duke's stage: B	total RNA	Total RNA was isolated from the adipose samples by Qiagen RNeasy spin columns with DNAse treatment. 2 纰実 of each sample was precipitated in ethanol and re-suspended in 14 纰宭 of water. Globin mitigation performed using Ambion's GLOBINclear kit (cat# AM1	Cy5	Custom automated version of the aminoallyl MessageAmp II kit from Ambion	9606	Microarrays are incubated at 40鎺矯 for 48 hours in a rotating carousel. Hybridizations to custom Agilent microarrays are completed as previously described (Hughes et al.Nat Biotech (2001), 19(4):342-7). Microarrays are washed to remove non-specific hybrid	Microarrays are scanned using the Agilent LP2 laser scanner. The scanner output is a Tiff file, which contains the quantitative hybridization data from each individual microarray. The Tiff files are then processed using Rosetta custom feature extraction s	human colorectal tumor RNA	Data were processed using the Rosetta Resolver搴?system. Rosetta's custom feature extraction software performs error modeling before data are loaded into the Resolver system. The Resolver system performs a squeeze operation that combines replicates of the	GPL13425	Michael,,Nebozhyn	GpGx/Computational System biology	Merck, Inc	Mail Stop WP53B-120, 770 Sumneytown Pike, Building 53, P.O. Box 4	West Point	PA	19486	USA	ftp://ftp.ncbi.nlm.nih.gov/geo/samples/GSM711nnn/GSM711484/suppl/GSM711484_16011454042405_1_1.txt.gz	ftp://ftp.ncbi.nlm.nih.gov/geo/samples/GSM711nnn/GSM711484/suppl/GSM711484_16011454043040_1_1.txt.gz	23698	60	B
GSM711485	colon carcinoma_3199	GSM711485	Public on Apr 25 2011	Apr 19 2011	Apr 25 2011	RNA	2	pool of individual tumors	Homo sapiens	sample type: reference	total RNA	Total RNA was isolated from the adipose samples by Qiagen RNeasy spin columns with DNAse treatment. 2 纰実 of each sample was precipitated in ethanol and re-suspended in 14 纰宭 of water. Globin mitigation performed using Ambion's GLOBINclear kit (cat# AM1	Cy3	Custom automated version of the aminoallyl MessageAmp II kit from Ambion	9606	colon carcinoma_3199	Homo sapiens	Stage: 2	overall survival (years): 11.67	overall survival censor (1-censored,0-non-censored): 0	metastasis (1-yes, 0-no): 0	time to metastasis (years): N/A	time to recurrence (years): 11.67	age at diagnosis: 52	tumor location: coecum	duke's stage: B	total RNA	Total RNA was isolated from the adipose samples by Qiagen RNeasy spin columns with DNAse treatment. 2 纰実 of each sample was precipitated in ethanol and re-suspended in 14 纰宭 of water. Globin mitigation performed using Ambion's GLOBINclear kit (cat# AM1	Cy5	Custom automated version of the aminoallyl MessageAmp II kit from Ambion	9606	Microarrays are incubated at 40鎺矯 for 48 hours in a rotating carousel. Hybridizations to custom Agilent microarrays are completed as previously described (Hughes et al.Nat Biotech (2001), 19(4):342-7). Microarrays are washed to remove non-specific hybrid	Microarrays are scanned using the Agilent LP2 laser scanner. The scanner output is a Tiff file, which contains the quantitative hybridization data from each individual microarray. The Tiff files are then processed using Rosetta custom feature extraction s	human colorectal tumor RNA	Data were processed using the Rosetta Resolver搴?system. Rosetta's custom feature extraction software performs error modeling before data are loaded into the Resolver system. The Resolver system performs a squeeze operation that combines replicates of the	GPL13425	Michael,,Nebozhyn	GpGx/Computational System biology	Merck, Inc	Mail Stop WP53B-120, 770 Sumneytown Pike, Building 53, P.O. Box 4	West Point	PA	19486	USA	ftp://ftp.ncbi.nlm.nih.gov/geo/samples/GSM711nnn/GSM711485/suppl/GSM711485_16011454042403_1_1.txt.gz	ftp://ftp.ncbi.nlm.nih.gov/geo/samples/GSM711nnn/GSM711485/suppl/GSM711485_16011454042404_1_1.txt.gz	23698	52	B
GSM711486	colon carcinoma_3173	GSM711486	Public on Apr 25 2011	Apr 19 2011	Apr 25 2011	RNA	2	pool of individual tumors	Homo sapiens	sample type: reference	total RNA	Total RNA was isolated from the adipose samples by Qiagen RNeasy spin columns with DNAse treatment. 2 纰実 of each sample was precipitated in ethanol and re-suspended in 14 纰宭 of water. Globin mitigation performed using Ambion's GLOBINclear kit (cat# AM1	Cy3	Custom automated version of the aminoallyl MessageAmp II kit from Ambion	9606	colon carcinoma_3173	Homo sapiens	Stage: 4	overall survival (years): 0.42	overall survival censor (1-censored,0-non-censored): 0	metastasis (1-yes, 0-no): 0	time to metastasis (years): N/A	time to recurrence (years): 0.42	age at diagnosis: 63	tumor location: sigmoid	duke's stage: D	total RNA	Total RNA was isolated from the adipose samples by Qiagen RNeasy spin columns with DNAse treatment. 2 纰実 of each sample was precipitated in ethanol and re-suspended in 14 纰宭 of water. Globin mitigation performed using Ambion's GLOBINclear kit (cat# AM1	Cy5	Custom automated version of the aminoallyl MessageAmp II kit from Ambion	9606	Microarrays are incubated at 40鎺矯 for 48 hours in a rotating carousel. Hybridizations to custom Agilent microarrays are completed as previously described (Hughes et al.Nat Biotech (2001), 19(4):342-7). Microarrays are washed to remove non-specific hybrid	Microarrays are scanned using the Agilent LP2 laser scanner. The scanner output is a Tiff file, which contains the quantitative hybridization data from each individual microarray. The Tiff files are then processed using Rosetta custom feature extraction s	human colorectal tumor RNA	Data were processed using the Rosetta Resolver搴?system. Rosetta's custom feature extraction software performs error modeling before data are loaded into the Resolver system. The Resolver system performs a squeeze operation that combines replicates of the	GPL13425	Michael,,Nebozhyn	GpGx/Computational System biology	Merck, Inc	Mail Stop WP53B-120, 770 Sumneytown Pike, Building 53, P.O. Box 4	West Point	PA	19486	USA	ftp://ftp.ncbi.nlm.nih.gov/geo/samples/GSM711nnn/GSM711486/suppl/GSM711486_16011454042401_1_1.txt.gz	ftp://ftp.ncbi.nlm.nih.gov/geo/samples/GSM711nnn/GSM711486/suppl/GSM711486_16011454042402_1_1.txt.gz	23698	63	D
GSM711487	colon carcinoma_3201	GSM711487	Public on Apr 25 2011	Apr 19 2011	Apr 25 2011	RNA	2	pool of individual tumors	Homo sapiens	sample type: reference	total RNA	Total RNA was isolated from the adipose samples by Qiagen RNeasy spin columns with DNAse treatment. 2 纰実 of each sample was precipitated in ethanol and re-suspended in 14 纰宭 of water. Globin mitigation performed using Ambion's GLOBINclear kit (cat# AM1	Cy3	Custom automated version of the aminoallyl MessageAmp II kit from Ambion	9606	colon carcinoma_3201	Homo sapiens	Stage: 2	overall survival (years): 11.25	overall survival censor (1-censored,0-non-censored): 1	metastasis (1-yes, 0-no): 0	time to metastasis (years): N/A	time to recurrence (years): 11.25	age at diagnosis: 52	tumor location: sigmoid	duke's stage: B	total RNA	Total RNA was isolated from the adipose samples by Qiagen RNeasy spin columns with DNAse treatment. 2 纰実 of each sample was precipitated in ethanol and re-suspended in 14 纰宭 of water. Globin mitigation performed using Ambion's GLOBINclear kit (cat# AM1	Cy5	Custom automated version of the aminoallyl MessageAmp II kit from Ambion	9606	Microarrays are incubated at 40鎺矯 for 48 hours in a rotating carousel. Hybridizations to custom Agilent microarrays are completed as previously described (Hughes et al.Nat Biotech (2001), 19(4):342-7). Microarrays are washed to remove non-specific hybrid	Microarrays are scanned using the Agilent LP2 laser scanner. The scanner output is a Tiff file, which contains the quantitative hybridization data from each individual microarray. The Tiff files are then processed using Rosetta custom feature extraction s	human colorectal tumor RNA	Data were processed using the Rosetta Resolver搴?system. Rosetta's custom feature extraction software performs error modeling before data are loaded into the Resolver system. The Resolver system performs a squeeze operation that combines replicates of the	GPL13425	Michael,,Nebozhyn	GpGx/Computational System biology	Merck, Inc	Mail Stop WP53B-120, 770 Sumneytown Pike, Building 53, P.O. Box 4	West Point	PA	19486	USA	ftp://ftp.ncbi.nlm.nih.gov/geo/samples/GSM711nnn/GSM711487/suppl/GSM711487_16011454042735_1_1.txt.gz	ftp://ftp.ncbi.nlm.nih.gov/geo/samples/GSM711nnn/GSM711487/suppl/GSM711487_16011454042736_1_1.txt.gz	23698	52	B
GSM711488	colon carcinoma_3102	GSM711488	Public on Apr 25 2011	Apr 19 2011	Apr 25 2011	RNA	2	pool of individual tumors	Homo sapiens	sample type: reference	total RNA	Total RNA was isolated from the adipose samples by Qiagen RNeasy spin columns with DNAse treatment. 2 纰実 of each sample was precipitated in ethanol and re-suspended in 14 纰宭 of water. Globin mitigation performed using Ambion's GLOBINclear kit (cat# AM1	Cy3	Custom automated version of the aminoallyl MessageAmp II kit from Ambion	9606	colon carcinoma_3102	Homo sapiens	Stage: 3	overall survival (years): 5.25	overall survival censor (1-censored,0-non-censored): 0	metastasis (1-yes, 0-no): 1	time to metastasis (years): 2.583333333	time to recurrence (years): 2.58	age at diagnosis: 40	tumor location: sigmoid	duke's stage: C	total RNA	Total RNA was isolated from the adipose samples by Qiagen RNeasy spin columns with DNAse treatment. 2 纰実 of each sample was precipitated in ethanol and re-suspended in 14 纰宭 of water. Globin mitigation performed using Ambion's GLOBINclear kit (cat# AM1	Cy5	Custom automated version of the aminoallyl MessageAmp II kit from Ambion	9606	Microarrays are incubated at 40鎺矯 for 48 hours in a rotating carousel. Hybridizations to custom Agilent microarrays are completed as previously described (Hughes et al.Nat Biotech (2001), 19(4):342-7). Microarrays are washed to remove non-specific hybrid	Microarrays are scanned using the Agilent LP2 laser scanner. The scanner output is a Tiff file, which contains the quantitative hybridization data from each individual microarray. The Tiff files are then processed using Rosetta custom feature extraction s	human colorectal tumor RNA	Data were processed using the Rosetta Resolver搴?system. Rosetta's custom feature extraction software performs error modeling before data are loaded into the Resolver system. The Resolver system performs a squeeze operation that combines replicates of the	GPL13425	Michael,,Nebozhyn	GpGx/Computational System biology	Merck, Inc	Mail Stop WP53B-120, 770 Sumneytown Pike, Building 53, P.O. Box 4	West Point	PA	19486	USA	ftp://ftp.ncbi.nlm.nih.gov/geo/samples/GSM711nnn/GSM711488/suppl/GSM711488_16011454042984_1_1.txt.gz	ftp://ftp.ncbi.nlm.nih.gov/geo/samples/GSM711nnn/GSM711488/suppl/GSM711488_16011454042985_1_1.txt.gz	23698	40	C
GSM711489	colon carcinoma_3174	GSM711489	Public on Apr 25 2011	Apr 19 2011	Apr 25 2011	RNA	2	pool of individual tumors	Homo sapiens	sample type: reference	total RNA	Total RNA was isolated from the adipose samples by Qiagen RNeasy spin columns with DNAse treatment. 2 纰実 of each sample was precipitated in ethanol and re-suspended in 14 纰宭 of water. Globin mitigation performed using Ambion's GLOBINclear kit (cat# AM1	Cy3	Custom automated version of the aminoallyl MessageAmp II kit from Ambion	9606	colon carcinoma_3174	Homo sapiens	Stage: 1	overall survival (years): 13.25	overall survival censor (1-censored,0-non-censored): 1	metastasis (1-yes, 0-no): 0	time to metastasis (years): N/A	time to recurrence (years): 13.25	age at diagnosis: 73	tumor location: ascend	duke's stage: B	total RNA	Total RNA was isolated from the adipose samples by Qiagen RNeasy spin columns with DNAse treatment. 2 纰実 of each sample was precipitated in ethanol and re-suspended in 14 纰宭 of water. Globin mitigation performed using Ambion's GLOBINclear kit (cat# AM1	Cy5	Custom automated version of the aminoallyl MessageAmp II kit from Ambion	9606	Microarrays are incubated at 40鎺矯 for 48 hours in a rotating carousel. Hybridizations to custom Agilent microarrays are completed as previously described (Hughes et al.Nat Biotech (2001), 19(4):342-7). Microarrays are washed to remove non-specific hybrid	Microarrays are scanned using the Agilent LP2 laser scanner. The scanner output is a Tiff file, which contains the quantitative hybridization data from each individual microarray. The Tiff files are then processed using Rosetta custom feature extraction s	human colorectal tumor RNA	Data were processed using the Rosetta Resolver搴?system. Rosetta's custom feature extraction software performs error modeling before data are loaded into the Resolver system. The Resolver system performs a squeeze operation that combines replicates of the	GPL13425	Michael,,Nebozhyn	GpGx/Computational System biology	Merck, Inc	Mail Stop WP53B-120, 770 Sumneytown Pike, Building 53, P.O. Box 4	West Point	PA	19486	USA	ftp://ftp.ncbi.nlm.nih.gov/geo/samples/GSM711nnn/GSM711489/suppl/GSM711489_16011454042593_1_1.txt.gz	ftp://ftp.ncbi.nlm.nih.gov/geo/samples/GSM711nnn/GSM711489/suppl/GSM711489_16011454043049_1_1.txt.gz	23698	73	B
GSM711490	colon carcinoma_3176	GSM711490	Public on Apr 25 2011	Apr 19 2011	Apr 25 2011	RNA	2	pool of individual tumors	Homo sapiens	sample type: reference	total RNA	Total RNA was isolated from the adipose samples by Qiagen RNeasy spin columns with DNAse treatment. 2 纰実 of each sample was precipitated in ethanol and re-suspended in 14 纰宭 of water. Globin mitigation performed using Ambion's GLOBINclear kit (cat# AM1	Cy3	Custom automated version of the aminoallyl MessageAmp II kit from Ambion	9606	colon carcinoma_3176	Homo sapiens	Stage: 3	overall survival (years): 10.17	overall survival censor (1-censored,0-non-censored): 1	metastasis (1-yes, 0-no): 0	time to metastasis (years): N/A	time to recurrence (years): 10.17	age at diagnosis: 49	tumor location: sigmoid	duke's stage: C	total RNA	Total RNA was isolated from the adipose samples by Qiagen RNeasy spin columns with DNAse treatment. 2 纰実 of each sample was precipitated in ethanol and re-suspended in 14 纰宭 of water. Globin mitigation performed using Ambion's GLOBINclear kit (cat# AM1	Cy5	Custom automated version of the aminoallyl MessageAmp II kit from Ambion	9606	Microarrays are incubated at 40鎺矯 for 48 hours in a rotating carousel. Hybridizations to custom Agilent microarrays are completed as previously described (Hughes et al.Nat Biotech (2001), 19(4):342-7). Microarrays are washed to remove non-specific hybrid	Microarrays are scanned using the Agilent LP2 laser scanner. The scanner output is a Tiff file, which contains the quantitative hybridization data from each individual microarray. The Tiff files are then processed using Rosetta custom feature extraction s	human colorectal tumor RNA	Data were processed using the Rosetta Resolver搴?system. Rosetta's custom feature extraction software performs error modeling before data are loaded into the Resolver system. The Resolver system performs a squeeze operation that combines replicates of the	GPL13425	Michael,,Nebozhyn	GpGx/Computational System biology	Merck, Inc	Mail Stop WP53B-120, 770 Sumneytown Pike, Building 53, P.O. Box 4	West Point	PA	19486	USA	ftp://ftp.ncbi.nlm.nih.gov/geo/samples/GSM711nnn/GSM711490/suppl/GSM711490_16011454043047_1_1.txt.gz	ftp://ftp.ncbi.nlm.nih.gov/geo/samples/GSM711nnn/GSM711490/suppl/GSM711490_16011454043048_1_1.txt.gz	23698	49	C
GSM711491	colon carcinoma_3177	GSM711491	Public on Apr 25 2011	Apr 19 2011	Apr 25 2011	RNA	2	pool of individual tumors	Homo sapiens	sample type: reference	total RNA	Total RNA was isolated from the adipose samples by Qiagen RNeasy spin columns with DNAse treatment. 2 纰実 of each sample was precipitated in ethanol and re-suspended in 14 纰宭 of water. Globin mitigation performed using Ambion's GLOBINclear kit (cat# AM1	Cy3	Custom automated version of the aminoallyl MessageAmp II kit from Ambion	9606	colon carcinoma_3177	Homo sapiens	Stage: 1	overall survival (years): 8.33	overall survival censor (1-censored,0-non-censored): 1	metastasis (1-yes, 0-no): 0	time to metastasis (years): N/A	time to recurrence (years): 8.33	age at diagnosis: 58	tumor location: sigmoid	duke's stage: B	total RNA	Total RNA was isolated from the adipose samples by Qiagen RNeasy spin columns with DNAse treatment. 2 纰実 of each sample was precipitated in ethanol and re-suspended in 14 纰宭 of water. Globin mitigation performed using Ambion's GLOBINclear kit (cat# AM1	Cy5	Custom automated version of the aminoallyl MessageAmp II kit from Ambion	9606	Microarrays are incubated at 40鎺矯 for 48 hours in a rotating carousel. Hybridizations to custom Agilent microarrays are completed as previously described (Hughes et al.Nat Biotech (2001), 19(4):342-7). Microarrays are washed to remove non-specific hybrid	Microarrays are scanned using the Agilent LP2 laser scanner. The scanner output is a Tiff file, which contains the quantitative hybridization data from each individual microarray. The Tiff files are then processed using Rosetta custom feature extraction s	human colorectal tumor RNA	Data were processed using the Rosetta Resolver搴?system. Rosetta's custom feature extraction software performs error modeling before data are loaded into the Resolver system. The Resolver system performs a squeeze operation that combines replicates of the	GPL13425	Michael,,Nebozhyn	GpGx/Computational System biology	Merck, Inc	Mail Stop WP53B-120, 770 Sumneytown Pike, Building 53, P.O. Box 4	West Point	PA	19486	USA	ftp://ftp.ncbi.nlm.nih.gov/geo/samples/GSM711nnn/GSM711491/suppl/GSM711491_16011454043045_1_1.txt.gz	ftp://ftp.ncbi.nlm.nih.gov/geo/samples/GSM711nnn/GSM711491/suppl/GSM711491_16011454043046_1_1.txt.gz	23698	58	B
GSM711492	colon carcinoma_3214	GSM711492	Public on Apr 25 2011	Apr 19 2011	Apr 25 2011	RNA	2	pool of individual tumors	Homo sapiens	sample type: reference	total RNA	Total RNA was isolated from the adipose samples by Qiagen RNeasy spin columns with DNAse treatment. 2 纰実 of each sample was precipitated in ethanol and re-suspended in 14 纰宭 of water. Globin mitigation performed using Ambion's GLOBINclear kit (cat# AM1	Cy3	Custom automated version of the aminoallyl MessageAmp II kit from Ambion	9606	colon carcinoma_3214	Homo sapiens	Stage: 2	overall survival (years): 5.83	overall survival censor (1-censored,0-non-censored): 1	metastasis (1-yes, 0-no): 0	time to metastasis (years): N/A	time to recurrence (years): 5.83	age at diagnosis: 79	tumor location: transvers	duke's stage: B	total RNA	Total RNA was isolated from the adipose samples by Qiagen RNeasy spin columns with DNAse treatment. 2 纰実 of each sample was precipitated in ethanol and re-suspended in 14 纰宭 of water. Globin mitigation performed using Ambion's GLOBINclear kit (cat# AM1	Cy5	Custom automated version of the aminoallyl MessageAmp II kit from Ambion	9606	Microarrays are incubated at 40鎺矯 for 48 hours in a rotating carousel. Hybridizations to custom Agilent microarrays are completed as previously described (Hughes et al.Nat Biotech (2001), 19(4):342-7). Microarrays are washed to remove non-specific hybrid	Microarrays are scanned using the Agilent LP2 laser scanner. The scanner output is a Tiff file, which contains the quantitative hybridization data from each individual microarray. The Tiff files are then processed using Rosetta custom feature extraction s	human colorectal tumor RNA	Data were processed using the Rosetta Resolver搴?system. Rosetta's custom feature extraction software performs error modeling before data are loaded into the Resolver system. The Resolver system performs a squeeze operation that combines replicates of the	GPL13425	Michael,,Nebozhyn	GpGx/Computational System biology	Merck, Inc	Mail Stop WP53B-120, 770 Sumneytown Pike, Building 53, P.O. Box 4	West Point	PA	19486	USA	ftp://ftp.ncbi.nlm.nih.gov/geo/samples/GSM711nnn/GSM711492/suppl/GSM711492_16011454043043_1_1.txt.gz	ftp://ftp.ncbi.nlm.nih.gov/geo/samples/GSM711nnn/GSM711492/suppl/GSM711492_16011454043044_1_1.txt.gz	23698	79	B
GSM711493	colon carcinoma_3179	GSM711493	Public on Apr 25 2011	Apr 19 2011	Apr 25 2011	RNA	2	pool of individual tumors	Homo sapiens	sample type: reference	total RNA	Total RNA was isolated from the adipose samples by Qiagen RNeasy spin columns with DNAse treatment. 2 纰実 of each sample was precipitated in ethanol and re-suspended in 14 纰宭 of water. Globin mitigation performed using Ambion's GLOBINclear kit (cat# AM1	Cy3	Custom automated version of the aminoallyl MessageAmp II kit from Ambion	9606	colon carcinoma_3179	Homo sapiens	Stage: 4	overall survival (years): 2.17	overall survival censor (1-censored,0-non-censored): 0	metastasis (1-yes, 0-no): 1	time to metastasis (years): 1.916666667	time to recurrence (years): 1.92	age at diagnosis: 68	tumor location: ascend	duke's stage: D	total RNA	Total RNA was isolated from the adipose samples by Qiagen RNeasy spin columns with DNAse treatment. 2 纰実 of each sample was precipitated in ethanol and re-suspended in 14 纰宭 of water. Globin mitigation performed using Ambion's GLOBINclear kit (cat# AM1	Cy5	Custom automated version of the aminoallyl MessageAmp II kit from Ambion	9606	Microarrays are incubated at 40鎺矯 for 48 hours in a rotating carousel. Hybridizations to custom Agilent microarrays are completed as previously described (Hughes et al.Nat Biotech (2001), 19(4):342-7). Microarrays are washed to remove non-specific hybrid	Microarrays are scanned using the Agilent LP2 laser scanner. The scanner output is a Tiff file, which contains the quantitative hybridization data from each individual microarray. The Tiff files are then processed using Rosetta custom feature extraction s	human colorectal tumor RNA	Data were processed using the Rosetta Resolver搴?system. Rosetta's custom feature extraction software performs error modeling before data are loaded into the Resolver system. The Resolver system performs a squeeze operation that combines replicates of the	GPL13425	Michael,,Nebozhyn	GpGx/Computational System biology	Merck, Inc	Mail Stop WP53B-120, 770 Sumneytown Pike, Building 53, P.O. Box 4	West Point	PA	19486	USA	ftp://ftp.ncbi.nlm.nih.gov/geo/samples/GSM711nnn/GSM711493/suppl/GSM711493_16011454042601_1_1.txt.gz	ftp://ftp.ncbi.nlm.nih.gov/geo/samples/GSM711nnn/GSM711493/suppl/GSM711493_16011454042602_1_1.txt.gz	23698	68	D
GSM711494	colon carcinoma_3181	GSM711494	Public on Apr 25 2011	Apr 19 2011	Apr 25 2011	RNA	2	pool of individual tumors	Homo sapiens	sample type: reference	total RNA	Total RNA was isolated from the adipose samples by Qiagen RNeasy spin columns with DNAse treatment. 2 纰実 of each sample was precipitated in ethanol and re-suspended in 14 纰宭 of water. Globin mitigation performed using Ambion's GLOBINclear kit (cat# AM1	Cy3	Custom automated version of the aminoallyl MessageAmp II kit from Ambion	9606	colon carcinoma_3181	Homo sapiens	Stage: 2	overall survival (years): 7.17	overall survival censor (1-censored,0-non-censored): 1	metastasis (1-yes, 0-no): 0	time to metastasis (years): N/A	time to recurrence (years): 7.17	age at diagnosis: 73	tumor location: sigmoid	duke's stage: B	total RNA	Total RNA was isolated from the adipose samples by Qiagen RNeasy spin columns with DNAse treatment. 2 纰実 of each sample was precipitated in ethanol and re-suspended in 14 纰宭 of water. Globin mitigation performed using Ambion's GLOBINclear kit (cat# AM1	Cy5	Custom automated version of the aminoallyl MessageAmp II kit from Ambion	9606	Microarrays are incubated at 40鎺矯 for 48 hours in a rotating carousel. Hybridizations to custom Agilent microarrays are completed as previously described (Hughes et al.Nat Biotech (2001), 19(4):342-7). Microarrays are washed to remove non-specific hybrid	Microarrays are scanned using the Agilent LP2 laser scanner. The scanner output is a Tiff file, which contains the quantitative hybridization data from each individual microarray. The Tiff files are then processed using Rosetta custom feature extraction s	human colorectal tumor RNA	Data were processed using the Rosetta Resolver搴?system. Rosetta's custom feature extraction software performs error modeling before data are loaded into the Resolver system. The Resolver system performs a squeeze operation that combines replicates of the	GPL13425	Michael,,Nebozhyn	GpGx/Computational System biology	Merck, Inc	Mail Stop WP53B-120, 770 Sumneytown Pike, Building 53, P.O. Box 4	West Point	PA	19486	USA	ftp://ftp.ncbi.nlm.nih.gov/geo/samples/GSM711nnn/GSM711494/suppl/GSM711494_16011454042599_1_1.txt.gz	ftp://ftp.ncbi.nlm.nih.gov/geo/samples/GSM711nnn/GSM711494/suppl/GSM711494_16011454042600_1_1.txt.gz	23698	73	B
GSM711495	colon carcinoma_3202	GSM711495	Public on Apr 25 2011	Apr 19 2011	Apr 25 2011	RNA	2	pool of individual tumors	Homo sapiens	sample type: reference	total RNA	Total RNA was isolated from the adipose samples by Qiagen RNeasy spin columns with DNAse treatment. 2 纰実 of each sample was precipitated in ethanol and re-suspended in 14 纰宭 of water. Globin mitigation performed using Ambion's GLOBINclear kit (cat# AM1	Cy3	Custom automated version of the aminoallyl MessageAmp II kit from Ambion	9606	colon carcinoma_3202	Homo sapiens	Stage: 1	overall survival (years): 7.25	overall survival censor (1-censored,0-non-censored): 1	metastasis (1-yes, 0-no): 0	time to metastasis (years): N/A	time to recurrence (years): 7.25	age at diagnosis: 57	tumor location: appendix	duke's stage: B	total RNA	Total RNA was isolated from the adipose samples by Qiagen RNeasy spin columns with DNAse treatment. 2 纰実 of each sample was precipitated in ethanol and re-suspended in 14 纰宭 of water. Globin mitigation performed using Ambion's GLOBINclear kit (cat# AM1	Cy5	Custom automated version of the aminoallyl MessageAmp II kit from Ambion	9606	Microarrays are incubated at 40鎺矯 for 48 hours in a rotating carousel. Hybridizations to custom Agilent microarrays are completed as previously described (Hughes et al.Nat Biotech (2001), 19(4):342-7). Microarrays are washed to remove non-specific hybrid	Microarrays are scanned using the Agilent LP2 laser scanner. The scanner output is a Tiff file, which contains the quantitative hybridization data from each individual microarray. The Tiff files are then processed using Rosetta custom feature extraction s	human colorectal tumor RNA	Data were processed using the Rosetta Resolver搴?system. Rosetta's custom feature extraction software performs error modeling before data are loaded into the Resolver system. The Resolver system performs a squeeze operation that combines replicates of the	GPL13425	Michael,,Nebozhyn	GpGx/Computational System biology	Merck, Inc	Mail Stop WP53B-120, 770 Sumneytown Pike, Building 53, P.O. Box 4	West Point	PA	19486	USA	ftp://ftp.ncbi.nlm.nih.gov/geo/samples/GSM711nnn/GSM711495/suppl/GSM711495_16011454042596_1_1.txt.gz	ftp://ftp.ncbi.nlm.nih.gov/geo/samples/GSM711nnn/GSM711495/suppl/GSM711495_16011454042597_1_1.txt.gz	23698	57	B
GSM711496	colon carcinoma_3103	GSM711496	Public on Apr 25 2011	Apr 19 2011	Apr 25 2011	RNA	2	pool of individual tumors	Homo sapiens	sample type: reference	total RNA	Total RNA was isolated from the adipose samples by Qiagen RNeasy spin columns with DNAse treatment. 2 纰実 of each sample was precipitated in ethanol and re-suspended in 14 纰宭 of water. Globin mitigation performed using Ambion's GLOBINclear kit (cat# AM1	Cy3	Custom automated version of the aminoallyl MessageAmp II kit from Ambion	9606	colon carcinoma_3103	Homo sapiens	Stage: 2	overall survival (years): 2.75	overall survival censor (1-censored,0-non-censored): 0	metastasis (1-yes, 0-no): 0	time to metastasis (years): N/A	time to recurrence (years): 2.75	age at diagnosis: 83	tumor location: N/A	duke's stage: B	total RNA	Total RNA was isolated from the adipose samples by Qiagen RNeasy spin columns with DNAse treatment. 2 纰実 of each sample was precipitated in ethanol and re-suspended in 14 纰宭 of water. Globin mitigation performed using Ambion's GLOBINclear kit (cat# AM1	Cy5	Custom automated version of the aminoallyl MessageAmp II kit from Ambion	9606	Microarrays are incubated at 40鎺矯 for 48 hours in a rotating carousel. Hybridizations to custom Agilent microarrays are completed as previously described (Hughes et al.Nat Biotech (2001), 19(4):342-7). Microarrays are washed to remove non-specific hybrid	Microarrays are scanned using the Agilent LP2 laser scanner. The scanner output is a Tiff file, which contains the quantitative hybridization data from each individual microarray. The Tiff files are then processed using Rosetta custom feature extraction s	human colorectal tumor RNA	Data were processed using the Rosetta Resolver搴?system. Rosetta's custom feature extraction software performs error modeling before data are loaded into the Resolver system. The Resolver system performs a squeeze operation that combines replicates of the	GPL13425	Michael,,Nebozhyn	GpGx/Computational System biology	Merck, Inc	Mail Stop WP53B-120, 770 Sumneytown Pike, Building 53, P.O. Box 4	West Point	PA	19486	USA	ftp://ftp.ncbi.nlm.nih.gov/geo/samples/GSM711nnn/GSM711496/suppl/GSM711496_16011454042594_1_1.txt.gz	ftp://ftp.ncbi.nlm.nih.gov/geo/samples/GSM711nnn/GSM711496/suppl/GSM711496_16011454042595_1_1.txt.gz	23698	83	B
GSM711497	colon carcinoma_3247	GSM711497	Public on Apr 25 2011	Apr 19 2011	Apr 25 2011	RNA	2	pool of individual tumors	Homo sapiens	sample type: reference	total RNA	Total RNA was isolated from the adipose samples by Qiagen RNeasy spin columns with DNAse treatment. 2 纰実 of each sample was precipitated in ethanol and re-suspended in 14 纰宭 of water. Globin mitigation performed using Ambion's GLOBINclear kit (cat# AM1	Cy3	Custom automated version of the aminoallyl MessageAmp II kit from Ambion	9606	colon carcinoma_3247	Homo sapiens	Stage: 2	overall survival (years): 7.58	overall survival censor (1-censored,0-non-censored): 1	metastasis (1-yes, 0-no): 0	time to metastasis (years): N/A	time to recurrence (years): 7.58	age at diagnosis: 74	tumor location: sigmoid	duke's stage: B	total RNA	Total RNA was isolated from the adipose samples by Qiagen RNeasy spin columns with DNAse treatment. 2 纰実 of each sample was precipitated in ethanol and re-suspended in 14 纰宭 of water. Globin mitigation performed using Ambion's GLOBINclear kit (cat# AM1	Cy5	Custom automated version of the aminoallyl MessageAmp II kit from Ambion	9606	Microarrays are incubated at 40鎺矯 for 48 hours in a rotating carousel. Hybridizations to custom Agilent microarrays are completed as previously described (Hughes et al.Nat Biotech (2001), 19(4):342-7). Microarrays are washed to remove non-specific hybrid	Microarrays are scanned using the Agilent LP2 laser scanner. The scanner output is a Tiff file, which contains the quantitative hybridization data from each individual microarray. The Tiff files are then processed using Rosetta custom feature extraction s	human colorectal tumor RNA	Data were processed using the Rosetta Resolver搴?system. Rosetta's custom feature extraction software performs error modeling before data are loaded into the Resolver system. The Resolver system performs a squeeze operation that combines replicates of the	GPL13425	Michael,,Nebozhyn	GpGx/Computational System biology	Merck, Inc	Mail Stop WP53B-120, 770 Sumneytown Pike, Building 53, P.O. Box 4	West Point	PA	19486	USA	ftp://ftp.ncbi.nlm.nih.gov/geo/samples/GSM711nnn/GSM711497/suppl/GSM711497_16011454042619_1_1.txt.gz	ftp://ftp.ncbi.nlm.nih.gov/geo/samples/GSM711nnn/GSM711497/suppl/GSM711497_16011454042620_1_1.txt.gz	23698	74	B
GSM711498	colon carcinoma_3203	GSM711498	Public on Apr 25 2011	Apr 19 2011	Apr 25 2011	RNA	2	pool of individual tumors	Homo sapiens	sample type: reference	total RNA	Total RNA was isolated from the adipose samples by Qiagen RNeasy spin columns with DNAse treatment. 2 纰実 of each sample was precipitated in ethanol and re-suspended in 14 纰宭 of water. Globin mitigation performed using Ambion's GLOBINclear kit (cat# AM1	Cy3	Custom automated version of the aminoallyl MessageAmp II kit from Ambion	9606	colon carcinoma_3203	Homo sapiens	Stage: 3	overall survival (years): 2.33	overall survival censor (1-censored,0-non-censored): 0	metastasis (1-yes, 0-no): 1	time to metastasis (years): 1.083333333	time to recurrence (years): 1.08	age at diagnosis: 56	tumor location: sigmoid	duke's stage: C	total RNA	Total RNA was isolated from the adipose samples by Qiagen RNeasy spin columns with DNAse treatment. 2 纰実 of each sample was precipitated in ethanol and re-suspended in 14 纰宭 of water. Globin mitigation performed using Ambion's GLOBINclear kit (cat# AM1	Cy5	Custom automated version of the aminoallyl MessageAmp II kit from Ambion	9606	Microarrays are incubated at 40鎺矯 for 48 hours in a rotating carousel. Hybridizations to custom Agilent microarrays are completed as previously described (Hughes et al.Nat Biotech (2001), 19(4):342-7). Microarrays are washed to remove non-specific hybrid	Microarrays are scanned using the Agilent LP2 laser scanner. The scanner output is a Tiff file, which contains the quantitative hybridization data from each individual microarray. The Tiff files are then processed using Rosetta custom feature extraction s	human colorectal tumor RNA	Data were processed using the Rosetta Resolver搴?system. Rosetta's custom feature extraction software performs error modeling before data are loaded into the Resolver system. The Resolver system performs a squeeze operation that combines replicates of the	GPL13425	Michael,,Nebozhyn	GpGx/Computational System biology	Merck, Inc	Mail Stop WP53B-120, 770 Sumneytown Pike, Building 53, P.O. Box 4	West Point	PA	19486	USA	ftp://ftp.ncbi.nlm.nih.gov/geo/samples/GSM711nnn/GSM711498/suppl/GSM711498_16011454042617_1_1.txt.gz	ftp://ftp.ncbi.nlm.nih.gov/geo/samples/GSM711nnn/GSM711498/suppl/GSM711498_16011454042618_1_1.txt.gz	23698	56	C
GSM711499	colon carcinoma_3248	GSM711499	Public on Apr 25 2011	Apr 19 2011	Apr 25 2011	RNA	2	pool of individual tumors	Homo sapiens	sample type: reference	total RNA	Total RNA was isolated from the adipose samples by Qiagen RNeasy spin columns with DNAse treatment. 2 纰実 of each sample was precipitated in ethanol and re-suspended in 14 纰宭 of water. Globin mitigation performed using Ambion's GLOBINclear kit (cat# AM1	Cy3	Custom automated version of the aminoallyl MessageAmp II kit from Ambion	9606	colon carcinoma_3248	Homo sapiens	Stage: 1	overall survival (years): 4.67	overall survival censor (1-censored,0-non-censored): 0	metastasis (1-yes, 0-no): 1	time to metastasis (years): 1.583333333	time to recurrence (years): 1.58	age at diagnosis: 70	tumor location: ascend	duke's stage: B	total RNA	Total RNA was isolated from the adipose samples by Qiagen RNeasy spin columns with DNAse treatment. 2 纰実 of each sample was precipitated in ethanol and re-suspended in 14 纰宭 of water. Globin mitigation performed using Ambion's GLOBINclear kit (cat# AM1	Cy5	Custom automated version of the aminoallyl MessageAmp II kit from Ambion	9606	Microarrays are incubated at 40鎺矯 for 48 hours in a rotating carousel. Hybridizations to custom Agilent microarrays are completed as previously described (Hughes et al.Nat Biotech (2001), 19(4):342-7). Microarrays are washed to remove non-specific hybrid	Microarrays are scanned using the Agilent LP2 laser scanner. The scanner output is a Tiff file, which contains the quantitative hybridization data from each individual microarray. The Tiff files are then processed using Rosetta custom feature extraction s	human colorectal tumor RNA	Data were processed using the Rosetta Resolver搴?system. Rosetta's custom feature extraction software performs error modeling before data are loaded into the Resolver system. The Resolver system performs a squeeze operation that combines replicates of the	GPL13425	Michael,,Nebozhyn	GpGx/Computational System biology	Merck, Inc	Mail Stop WP53B-120, 770 Sumneytown Pike, Building 53, P.O. Box 4	West Point	PA	19486	USA	ftp://ftp.ncbi.nlm.nih.gov/geo/samples/GSM711nnn/GSM711499/suppl/GSM711499_16011454043036_1_1.txt.gz	ftp://ftp.ncbi.nlm.nih.gov/geo/samples/GSM711nnn/GSM711499/suppl/GSM711499_16011454043037_1_1.txt.gz	23698	70	B
GSM711500	colon carcinoma_3105	GSM711500	Public on Apr 25 2011	Apr 19 2011	Apr 25 2011	RNA	2	pool of individual tumors	Homo sapiens	sample type: reference	total RNA	Total RNA was isolated from the adipose samples by Qiagen RNeasy spin columns with DNAse treatment. 2 纰実 of each sample was precipitated in ethanol and re-suspended in 14 纰宭 of water. Globin mitigation performed using Ambion's GLOBINclear kit (cat# AM1	Cy3	Custom automated version of the aminoallyl MessageAmp II kit from Ambion	9606	colon carcinoma_3105	Homo sapiens	Stage: 3	overall survival (years): 6.33	overall survival censor (1-censored,0-non-censored): 1	metastasis (1-yes, 0-no): 0	time to metastasis (years): N/A	time to recurrence (years): 6.33	age at diagnosis: 60	tumor location: sigmoid	duke's stage: C	total RNA	Total RNA was isolated from the adipose samples by Qiagen RNeasy spin columns with DNAse treatment. 2 纰実 of each sample was precipitated in ethanol and re-suspended in 14 纰宭 of water. Globin mitigation performed using Ambion's GLOBINclear kit (cat# AM1	Cy5	Custom automated version of the aminoallyl MessageAmp II kit from Ambion	9606	Microarrays are incubated at 40鎺矯 for 48 hours in a rotating carousel. Hybridizations to custom Agilent microarrays are completed as previously described (Hughes et al.Nat Biotech (2001), 19(4):342-7). Microarrays are washed to remove non-specific hybrid	Microarrays are scanned using the Agilent LP2 laser scanner. The scanner output is a Tiff file, which contains the quantitative hybridization data from each individual microarray. The Tiff files are then processed using Rosetta custom feature extraction s	human colorectal tumor RNA	Data were processed using the Rosetta Resolver搴?system. Rosetta's custom feature extraction software performs error modeling before data are loaded into the Resolver system. The Resolver system performs a squeeze operation that combines replicates of the	GPL13425	Michael,,Nebozhyn	GpGx/Computational System biology	Merck, Inc	Mail Stop WP53B-120, 770 Sumneytown Pike, Building 53, P.O. Box 4	West Point	PA	19486	USA	ftp://ftp.ncbi.nlm.nih.gov/geo/samples/GSM711nnn/GSM711500/suppl/GSM711500_16011454042615_1_1.txt.gz	ftp://ftp.ncbi.nlm.nih.gov/geo/samples/GSM711nnn/GSM711500/suppl/GSM711500_16011454042616_1_1.txt.gz	23698	60	C
GSM711501	colon carcinoma_3240	GSM711501	Public on Apr 25 2011	Apr 19 2011	Apr 25 2011	RNA	2	pool of individual tumors	Homo sapiens	sample type: reference	total RNA	Total RNA was isolated from the adipose samples by Qiagen RNeasy spin columns with DNAse treatment. 2 纰実 of each sample was precipitated in ethanol and re-suspended in 14 纰宭 of water. Globin mitigation performed using Ambion's GLOBINclear kit (cat# AM1	Cy3	Custom automated version of the aminoallyl MessageAmp II kit from Ambion	9606	colon carcinoma_3240	Homo sapiens	Stage: 1	overall survival (years): 6.58	overall survival censor (1-censored,0-non-censored): 0	metastasis (1-yes, 0-no): 0	time to metastasis (years): N/A	time to recurrence (years): 6.58	age at diagnosis: 66	tumor location: sigmoid	duke's stage: B	total RNA	Total RNA was isolated from the adipose samples by Qiagen RNeasy spin columns with DNAse treatment. 2 纰実 of each sample was precipitated in ethanol and re-suspended in 14 纰宭 of water. Globin mitigation performed using Ambion's GLOBINclear kit (cat# AM1	Cy5	Custom automated version of the aminoallyl MessageAmp II kit from Ambion	9606	Microarrays are incubated at 40鎺矯 for 48 hours in a rotating carousel. Hybridizations to custom Agilent microarrays are completed as previously described (Hughes et al.Nat Biotech (2001), 19(4):342-7). Microarrays are washed to remove non-specific hybrid	Microarrays are scanned using the Agilent LP2 laser scanner. The scanner output is a Tiff file, which contains the quantitative hybridization data from each individual microarray. The Tiff files are then processed using Rosetta custom feature extraction s	human colorectal tumor RNA	Data were processed using the Rosetta Resolver搴?system. Rosetta's custom feature extraction software performs error modeling before data are loaded into the Resolver system. The Resolver system performs a squeeze operation that combines replicates of the	GPL13425	Michael,,Nebozhyn	GpGx/Computational System biology	Merck, Inc	Mail Stop WP53B-120, 770 Sumneytown Pike, Building 53, P.O. Box 4	West Point	PA	19486	USA	ftp://ftp.ncbi.nlm.nih.gov/geo/samples/GSM711nnn/GSM711501/suppl/GSM711501_16011454042613_1_1.txt.gz	ftp://ftp.ncbi.nlm.nih.gov/geo/samples/GSM711nnn/GSM711501/suppl/GSM711501_16011454042614_1_1.txt.gz	23698	66	B
GSM711502	colon carcinoma_3251	GSM711502	Public on Apr 25 2011	Apr 19 2011	Apr 25 2011	RNA	2	pool of individual tumors	Homo sapiens	sample type: reference	total RNA	Total RNA was isolated from the adipose samples by Qiagen RNeasy spin columns with DNAse treatment. 2 纰実 of each sample was precipitated in ethanol and re-suspended in 14 纰宭 of water. Globin mitigation performed using Ambion's GLOBINclear kit (cat# AM1	Cy3	Custom automated version of the aminoallyl MessageAmp II kit from Ambion	9606	colon carcinoma_3251	Homo sapiens	Stage: 2	overall survival (years): 5.75	overall survival censor (1-censored,0-non-censored): 1	metastasis (1-yes, 0-no): 0	time to metastasis (years): N/A	time to recurrence (years): 5.75	age at diagnosis: 50	tumor location: ascend	duke's stage: B	total RNA	Total RNA was isolated from the adipose samples by Qiagen RNeasy spin columns with DNAse treatment. 2 纰実 of each sample was precipitated in ethanol and re-suspended in 14 纰宭 of water. Globin mitigation performed using Ambion's GLOBINclear kit (cat# AM1	Cy5	Custom automated version of the aminoallyl MessageAmp II kit from Ambion	9606	Microarrays are incubated at 40鎺矯 for 48 hours in a rotating carousel. Hybridizations to custom Agilent microarrays are completed as previously described (Hughes et al.Nat Biotech (2001), 19(4):342-7). Microarrays are washed to remove non-specific hybrid	Microarrays are scanned using the Agilent LP2 laser scanner. The scanner output is a Tiff file, which contains the quantitative hybridization data from each individual microarray. The Tiff files are then processed using Rosetta custom feature extraction s	human colorectal tumor RNA	Data were processed using the Rosetta Resolver搴?system. Rosetta's custom feature extraction software performs error modeling before data are loaded into the Resolver system. The Resolver system performs a squeeze operation that combines replicates of the	GPL13425	Michael,,Nebozhyn	GpGx/Computational System biology	Merck, Inc	Mail Stop WP53B-120, 770 Sumneytown Pike, Building 53, P.O. Box 4	West Point	PA	19486	USA	ftp://ftp.ncbi.nlm.nih.gov/geo/samples/GSM711nnn/GSM711502/suppl/GSM711502_16011454042623_1_1.txt.gz	ftp://ftp.ncbi.nlm.nih.gov/geo/samples/GSM711nnn/GSM711502/suppl/GSM711502_16011454042626_1_1.txt.gz	23698	50	B
GSM711503	colon carcinoma_3183	GSM711503	Public on Apr 25 2011	Apr 19 2011	Apr 25 2011	RNA	2	pool of individual tumors	Homo sapiens	sample type: reference	total RNA	Total RNA was isolated from the adipose samples by Qiagen RNeasy spin columns with DNAse treatment. 2 纰実 of each sample was precipitated in ethanol and re-suspended in 14 纰宭 of water. Globin mitigation performed using Ambion's GLOBINclear kit (cat# AM1	Cy3	Custom automated version of the aminoallyl MessageAmp II kit from Ambion	9606	colon carcinoma_3183	Homo sapiens	Stage: 4	overall survival (years): 4.33	overall survival censor (1-censored,0-non-censored): 0	metastasis (1-yes, 0-no): 1	time to metastasis (years): 4.083333333	time to recurrence (years): 4.08	age at diagnosis: 70	tumor location: transvers	duke's stage: D	total RNA	Total RNA was isolated from the adipose samples by Qiagen RNeasy spin columns with DNAse treatment. 2 纰実 of each sample was precipitated in ethanol and re-suspended in 14 纰宭 of water. Globin mitigation performed using Ambion's GLOBINclear kit (cat# AM1	Cy5	Custom automated version of the aminoallyl MessageAmp II kit from Ambion	9606	Microarrays are incubated at 40鎺矯 for 48 hours in a rotating carousel. Hybridizations to custom Agilent microarrays are completed as previously described (Hughes et al.Nat Biotech (2001), 19(4):342-7). Microarrays are washed to remove non-specific hybrid	Microarrays are scanned using the Agilent LP2 laser scanner. The scanner output is a Tiff file, which contains the quantitative hybridization data from each individual microarray. The Tiff files are then processed using Rosetta custom feature extraction s	human colorectal tumor RNA	Data were processed using the Rosetta Resolver搴?system. Rosetta's custom feature extraction software performs error modeling before data are loaded into the Resolver system. The Resolver system performs a squeeze operation that combines replicates of the	GPL13425	Michael,,Nebozhyn	GpGx/Computational System biology	Merck, Inc	Mail Stop WP53B-120, 770 Sumneytown Pike, Building 53, P.O. Box 4	West Point	PA	19486	USA	ftp://ftp.ncbi.nlm.nih.gov/geo/samples/GSM711nnn/GSM711503/suppl/GSM711503_16011454042624_1_1.txt.gz	ftp://ftp.ncbi.nlm.nih.gov/geo/samples/GSM711nnn/GSM711503/suppl/GSM711503_16011454042625_1_1.txt.gz	23698	70	D
GSM711504	colon carcinoma_3216	GSM711504	Public on Apr 25 2011	Apr 19 2011	Apr 25 2011	RNA	2	pool of individual tumors	Homo sapiens	sample type: reference	total RNA	Total RNA was isolated from the adipose samples by Qiagen RNeasy spin columns with DNAse treatment. 2 纰実 of each sample was precipitated in ethanol and re-suspended in 14 纰宭 of water. Globin mitigation performed using Ambion's GLOBINclear kit (cat# AM1	Cy3	Custom automated version of the aminoallyl MessageAmp II kit from Ambion	9606	colon carcinoma_3216	Homo sapiens	Stage: 2	overall survival (years): 10.49	overall survival censor (1-censored,0-non-censored): 1	metastasis (1-yes, 0-no): 0	time to metastasis (years): N/A	time to recurrence (years): 10.49	age at diagnosis: 55	tumor location: sigmoid	duke's stage: B	total RNA	Total RNA was isolated from the adipose samples by Qiagen RNeasy spin columns with DNAse treatment. 2 纰実 of each sample was precipitated in ethanol and re-suspended in 14 纰宭 of water. Globin mitigation performed using Ambion's GLOBINclear kit (cat# AM1	Cy5	Custom automated version of the aminoallyl MessageAmp II kit from Ambion	9606	Microarrays are incubated at 40鎺矯 for 48 hours in a rotating carousel. Hybridizations to custom Agilent microarrays are completed as previously described (Hughes et al.Nat Biotech (2001), 19(4):342-7). Microarrays are washed to remove non-specific hybrid	Microarrays are scanned using the Agilent LP2 laser scanner. The scanner output is a Tiff file, which contains the quantitative hybridization data from each individual microarray. The Tiff files are then processed using Rosetta custom feature extraction s	human colorectal tumor RNA	Data were processed using the Rosetta Resolver搴?system. Rosetta's custom feature extraction software performs error modeling before data are loaded into the Resolver system. The Resolver system performs a squeeze operation that combines replicates of the	GPL13425	Michael,,Nebozhyn	GpGx/Computational System biology	Merck, Inc	Mail Stop WP53B-120, 770 Sumneytown Pike, Building 53, P.O. Box 4	West Point	PA	19486	USA	ftp://ftp.ncbi.nlm.nih.gov/geo/samples/GSM711nnn/GSM711504/suppl/GSM711504_16011454043032_1_1.txt.gz	ftp://ftp.ncbi.nlm.nih.gov/geo/samples/GSM711nnn/GSM711504/suppl/GSM711504_16011454043033_1_1.txt.gz	23698	55	B
GSM711505	colon carcinoma_3205	GSM711505	Public on Apr 25 2011	Apr 19 2011	Apr 25 2011	RNA	2	pool of individual tumors	Homo sapiens	sample type: reference	total RNA	Total RNA was isolated from the adipose samples by Qiagen RNeasy spin columns with DNAse treatment. 2 纰実 of each sample was precipitated in ethanol and re-suspended in 14 纰宭 of water. Globin mitigation performed using Ambion's GLOBINclear kit (cat# AM1	Cy3	Custom automated version of the aminoallyl MessageAmp II kit from Ambion	9606	colon carcinoma_3205	Homo sapiens	Stage: 2	overall survival (years): 10.06	overall survival censor (1-censored,0-non-censored): 1	metastasis (1-yes, 0-no): 0	time to metastasis (years): N/A	time to recurrence (years): 10.06	age at diagnosis: 53	tumor location: ascend	duke's stage: B	total RNA	Total RNA was isolated from the adipose samples by Qiagen RNeasy spin columns with DNAse treatment. 2 纰実 of each sample was precipitated in ethanol and re-suspended in 14 纰宭 of water. Globin mitigation performed using Ambion's GLOBINclear kit (cat# AM1	Cy5	Custom automated version of the aminoallyl MessageAmp II kit from Ambion	9606	Microarrays are incubated at 40鎺矯 for 48 hours in a rotating carousel. Hybridizations to custom Agilent microarrays are completed as previously described (Hughes et al.Nat Biotech (2001), 19(4):342-7). Microarrays are washed to remove non-specific hybrid	Microarrays are scanned using the Agilent LP2 laser scanner. The scanner output is a Tiff file, which contains the quantitative hybridization data from each individual microarray. The Tiff files are then processed using Rosetta custom feature extraction s	human colorectal tumor RNA	Data were processed using the Rosetta Resolver搴?system. Rosetta's custom feature extraction software performs error modeling before data are loaded into the Resolver system. The Resolver system performs a squeeze operation that combines replicates of the	GPL13425	Michael,,Nebozhyn	GpGx/Computational System biology	Merck, Inc	Mail Stop WP53B-120, 770 Sumneytown Pike, Building 53, P.O. Box 4	West Point	PA	19486	USA	ftp://ftp.ncbi.nlm.nih.gov/geo/samples/GSM711nnn/GSM711505/suppl/GSM711505_16011454042621_1_1.txt.gz	ftp://ftp.ncbi.nlm.nih.gov/geo/samples/GSM711nnn/GSM711505/suppl/GSM711505_16011454042622_1_1.txt.gz	23698	53	B
GSM711506	colon carcinoma_3184	GSM711506	Public on Apr 25 2011	Apr 19 2011	Apr 25 2011	RNA	2	pool of individual tumors	Homo sapiens	sample type: reference	total RNA	Total RNA was isolated from the adipose samples by Qiagen RNeasy spin columns with DNAse treatment. 2 纰実 of each sample was precipitated in ethanol and re-suspended in 14 纰宭 of water. Globin mitigation performed using Ambion's GLOBINclear kit (cat# AM1	Cy3	Custom automated version of the aminoallyl MessageAmp II kit from Ambion	9606	colon carcinoma_3184	Homo sapiens	Stage: 2	overall survival (years): 7.32	overall survival censor (1-censored,0-non-censored): 1	metastasis (1-yes, 0-no): 0	time to metastasis (years): N/A	time to recurrence (years): 7.32	age at diagnosis: 78	tumor location: ascend	duke's stage: B	total RNA	Total RNA was isolated from the adipose samples by Qiagen RNeasy spin columns with DNAse treatment. 2 纰実 of each sample was precipitated in ethanol and re-suspended in 14 纰宭 of water. Globin mitigation performed using Ambion's GLOBINclear kit (cat# AM1	Cy5	Custom automated version of the aminoallyl MessageAmp II kit from Ambion	9606	Microarrays are incubated at 40鎺矯 for 48 hours in a rotating carousel. Hybridizations to custom Agilent microarrays are completed as previously described (Hughes et al.Nat Biotech (2001), 19(4):342-7). Microarrays are washed to remove non-specific hybrid	Microarrays are scanned using the Agilent LP2 laser scanner. The scanner output is a Tiff file, which contains the quantitative hybridization data from each individual microarray. The Tiff files are then processed using Rosetta custom feature extraction s	human colorectal tumor RNA	Data were processed using the Rosetta Resolver搴?system. Rosetta's custom feature extraction software performs error modeling before data are loaded into the Resolver system. The Resolver system performs a squeeze operation that combines replicates of the	GPL13425	Michael,,Nebozhyn	GpGx/Computational System biology	Merck, Inc	Mail Stop WP53B-120, 770 Sumneytown Pike, Building 53, P.O. Box 4	West Point	PA	19486	USA	ftp://ftp.ncbi.nlm.nih.gov/geo/samples/GSM711nnn/GSM711506/suppl/GSM711506_16011454042636_1_1.txt.gz	ftp://ftp.ncbi.nlm.nih.gov/geo/samples/GSM711nnn/GSM711506/suppl/GSM711506_16011454042637_1_1.txt.gz	23698	78	B
GSM711507	colon carcinoma_3218	GSM711507	Public on Apr 25 2011	Apr 19 2011	Apr 25 2011	RNA	2	pool of individual tumors	Homo sapiens	sample type: reference	total RNA	Total RNA was isolated from the adipose samples by Qiagen RNeasy spin columns with DNAse treatment. 2 纰実 of each sample was precipitated in ethanol and re-suspended in 14 纰宭 of water. Globin mitigation performed using Ambion's GLOBINclear kit (cat# AM1	Cy3	Custom automated version of the aminoallyl MessageAmp II kit from Ambion	9606	colon carcinoma_3218	Homo sapiens	Stage: 1	overall survival (years): 7.42	overall survival censor (1-censored,0-non-censored): 1	metastasis (1-yes, 0-no): 0	time to metastasis (years): N/A	time to recurrence (years): 7.42	age at diagnosis: 67	tumor location: sigmoid	duke's stage: B	total RNA	Total RNA was isolated from the adipose samples by Qiagen RNeasy spin columns with DNAse treatment. 2 纰実 of each sample was precipitated in ethanol and re-suspended in 14 纰宭 of water. Globin mitigation performed using Ambion's GLOBINclear kit (cat# AM1	Cy5	Custom automated version of the aminoallyl MessageAmp II kit from Ambion	9606	Microarrays are incubated at 40鎺矯 for 48 hours in a rotating carousel. Hybridizations to custom Agilent microarrays are completed as previously described (Hughes et al.Nat Biotech (2001), 19(4):342-7). Microarrays are washed to remove non-specific hybrid	Microarrays are scanned using the Agilent LP2 laser scanner. The scanner output is a Tiff file, which contains the quantitative hybridization data from each individual microarray. The Tiff files are then processed using Rosetta custom feature extraction s	human colorectal tumor RNA	Data were processed using the Rosetta Resolver搴?system. Rosetta's custom feature extraction software performs error modeling before data are loaded into the Resolver system. The Resolver system performs a squeeze operation that combines replicates of the	GPL13425	Michael,,Nebozhyn	GpGx/Computational System biology	Merck, Inc	Mail Stop WP53B-120, 770 Sumneytown Pike, Building 53, P.O. Box 4	West Point	PA	19486	USA	ftp://ftp.ncbi.nlm.nih.gov/geo/samples/GSM711nnn/GSM711507/suppl/GSM711507_16011454042631_1_1.txt.gz	ftp://ftp.ncbi.nlm.nih.gov/geo/samples/GSM711nnn/GSM711507/suppl/GSM711507_16011454042632_1_1.txt.gz	23698	67	B
GSM711508	colon carcinoma_3206	GSM711508	Public on Apr 25 2011	Apr 19 2011	Apr 25 2011	RNA	2	pool of individual tumors	Homo sapiens	sample type: reference	total RNA	Total RNA was isolated from the adipose samples by Qiagen RNeasy spin columns with DNAse treatment. 2 纰実 of each sample was precipitated in ethanol and re-suspended in 14 纰宭 of water. Globin mitigation performed using Ambion's GLOBINclear kit (cat# AM1	Cy3	Custom automated version of the aminoallyl MessageAmp II kit from Ambion	9606	colon carcinoma_3206	Homo sapiens	Stage: 2	overall survival (years): 2.83	overall survival censor (1-censored,0-non-censored): 1	metastasis (1-yes, 0-no): 0	time to metastasis (years): N/A	time to recurrence (years): 2.83	age at diagnosis: 76	tumor location: sigmoid	duke's stage: B	total RNA	Total RNA was isolated from the adipose samples by Qiagen RNeasy spin columns with DNAse treatment. 2 纰実 of each sample was precipitated in ethanol and re-suspended in 14 纰宭 of water. Globin mitigation performed using Ambion's GLOBINclear kit (cat# AM1	Cy5	Custom automated version of the aminoallyl MessageAmp II kit from Ambion	9606	Microarrays are incubated at 40鎺矯 for 48 hours in a rotating carousel. Hybridizations to custom Agilent microarrays are completed as previously described (Hughes et al.Nat Biotech (2001), 19(4):342-7). Microarrays are washed to remove non-specific hybrid	Microarrays are scanned using the Agilent LP2 laser scanner. The scanner output is a Tiff file, which contains the quantitative hybridization data from each individual microarray. The Tiff files are then processed using Rosetta custom feature extraction s	human colorectal tumor RNA	Data were processed using the Rosetta Resolver搴?system. Rosetta's custom feature extraction software performs error modeling before data are loaded into the Resolver system. The Resolver system performs a squeeze operation that combines replicates of the	GPL13425	Michael,,Nebozhyn	GpGx/Computational System biology	Merck, Inc	Mail Stop WP53B-120, 770 Sumneytown Pike, Building 53, P.O. Box 4	West Point	PA	19486	USA	ftp://ftp.ncbi.nlm.nih.gov/geo/samples/GSM711nnn/GSM711508/suppl/GSM711508_16011454042629_1_1.txt.gz	ftp://ftp.ncbi.nlm.nih.gov/geo/samples/GSM711nnn/GSM711508/suppl/GSM711508_16011454042630_1_1.txt.gz	23698	76	B
GSM711509	colon carcinoma_3219	GSM711509	Public on Apr 25 2011	Apr 19 2011	Apr 25 2011	RNA	2	pool of individual tumors	Homo sapiens	sample type: reference	total RNA	Total RNA was isolated from the adipose samples by Qiagen RNeasy spin columns with DNAse treatment. 2 纰実 of each sample was precipitated in ethanol and re-suspended in 14 纰宭 of water. Globin mitigation performed using Ambion's GLOBINclear kit (cat# AM1	Cy3	Custom automated version of the aminoallyl MessageAmp II kit from Ambion	9606	colon carcinoma_3219	Homo sapiens	Stage: 2	overall survival (years): 9.59	overall survival censor (1-censored,0-non-censored): 1	metastasis (1-yes, 0-no): 0	time to metastasis (years): N/A	time to recurrence (years): 9.59	age at diagnosis: 59	tumor location: ascend	duke's stage: B	total RNA	Total RNA was isolated from the adipose samples by Qiagen RNeasy spin columns with DNAse treatment. 2 纰実 of each sample was precipitated in ethanol and re-suspended in 14 纰宭 of water. Globin mitigation performed using Ambion's GLOBINclear kit (cat# AM1	Cy5	Custom automated version of the aminoallyl MessageAmp II kit from Ambion	9606	Microarrays are incubated at 40鎺矯 for 48 hours in a rotating carousel. Hybridizations to custom Agilent microarrays are completed as previously described (Hughes et al.Nat Biotech (2001), 19(4):342-7). Microarrays are washed to remove non-specific hybrid	Microarrays are scanned using the Agilent LP2 laser scanner. The scanner output is a Tiff file, which contains the quantitative hybridization data from each individual microarray. The Tiff files are then processed using Rosetta custom feature extraction s	human colorectal tumor RNA	Data were processed using the Rosetta Resolver搴?system. Rosetta's custom feature extraction software performs error modeling before data are loaded into the Resolver system. The Resolver system performs a squeeze operation that combines replicates of the	GPL13425	Michael,,Nebozhyn	GpGx/Computational System biology	Merck, Inc	Mail Stop WP53B-120, 770 Sumneytown Pike, Building 53, P.O. Box 4	West Point	PA	19486	USA	ftp://ftp.ncbi.nlm.nih.gov/geo/samples/GSM711nnn/GSM711509/suppl/GSM711509_16011454042633_1_1.txt.gz	ftp://ftp.ncbi.nlm.nih.gov/geo/samples/GSM711nnn/GSM711509/suppl/GSM711509_16011454042635_1_1.txt.gz	23698	59	B
GSM711510	colon carcinoma_3186	GSM711510	Public on Apr 25 2011	Apr 19 2011	Apr 25 2011	RNA	2	pool of individual tumors	Homo sapiens	sample type: reference	total RNA	Total RNA was isolated from the adipose samples by Qiagen RNeasy spin columns with DNAse treatment. 2 纰実 of each sample was precipitated in ethanol and re-suspended in 14 纰宭 of water. Globin mitigation performed using Ambion's GLOBINclear kit (cat# AM1	Cy3	Custom automated version of the aminoallyl MessageAmp II kit from Ambion	9606	colon carcinoma_3186	Homo sapiens	Stage: 2	overall survival (years): 2.25	overall survival censor (1-censored,0-non-censored): 1	metastasis (1-yes, 0-no): 0	time to metastasis (years): N/A	time to recurrence (years): 2.25	age at diagnosis: 37	tumor location: sigmoid	duke's stage: B	total RNA	Total RNA was isolated from the adipose samples by Qiagen RNeasy spin columns with DNAse treatment. 2 纰実 of each sample was precipitated in ethanol and re-suspended in 14 纰宭 of water. Globin mitigation performed using Ambion's GLOBINclear kit (cat# AM1	Cy5	Custom automated version of the aminoallyl MessageAmp II kit from Ambion	9606	Microarrays are incubated at 40鎺矯 for 48 hours in a rotating carousel. Hybridizations to custom Agilent microarrays are completed as previously described (Hughes et al.Nat Biotech (2001), 19(4):342-7). Microarrays are washed to remove non-specific hybrid	Microarrays are scanned using the Agilent LP2 laser scanner. The scanner output is a Tiff file, which contains the quantitative hybridization data from each individual microarray. The Tiff files are then processed using Rosetta custom feature extraction s	human colorectal tumor RNA	Data were processed using the Rosetta Resolver搴?system. Rosetta's custom feature extraction software performs error modeling before data are loaded into the Resolver system. The Resolver system performs a squeeze operation that combines replicates of the	GPL13425	Michael,,Nebozhyn	GpGx/Computational System biology	Merck, Inc	Mail Stop WP53B-120, 770 Sumneytown Pike, Building 53, P.O. Box 4	West Point	PA	19486	USA	ftp://ftp.ncbi.nlm.nih.gov/geo/samples/GSM711nnn/GSM711510/suppl/GSM711510_16011454042948_1_1.txt.gz	ftp://ftp.ncbi.nlm.nih.gov/geo/samples/GSM711nnn/GSM711510/suppl/GSM711510_16011454042949_1_1.txt.gz	23698	37	B
GSM711511	colon carcinoma_3145	GSM711511	Public on Apr 25 2011	Apr 19 2011	Apr 25 2011	RNA	2	pool of individual tumors	Homo sapiens	sample type: reference	total RNA	Total RNA was isolated from the adipose samples by Qiagen RNeasy spin columns with DNAse treatment. 2 纰実 of each sample was precipitated in ethanol and re-suspended in 14 纰宭 of water. Globin mitigation performed using Ambion's GLOBINclear kit (cat# AM1	Cy3	Custom automated version of the aminoallyl MessageAmp II kit from Ambion	9606	colon carcinoma_3145	Homo sapiens	Stage: 3	overall survival (years): 0.67	overall survival censor (1-censored,0-non-censored): 1	metastasis (1-yes, 0-no): 0	time to metastasis (years): N/A	time to recurrence (years): 0.67	age at diagnosis: 64	tumor location: transvers	duke's stage: C	total RNA	Total RNA was isolated from the adipose samples by Qiagen RNeasy spin columns with DNAse treatment. 2 纰実 of each sample was precipitated in ethanol and re-suspended in 14 纰宭 of water. Globin mitigation performed using Ambion's GLOBINclear kit (cat# AM1	Cy5	Custom automated version of the aminoallyl MessageAmp II kit from Ambion	9606	Microarrays are incubated at 40鎺矯 for 48 hours in a rotating carousel. Hybridizations to custom Agilent microarrays are completed as previously described (Hughes et al.Nat Biotech (2001), 19(4):342-7). Microarrays are washed to remove non-specific hybrid	Microarrays are scanned using the Agilent LP2 laser scanner. The scanner output is a Tiff file, which contains the quantitative hybridization data from each individual microarray. The Tiff files are then processed using Rosetta custom feature extraction s	human colorectal tumor RNA	Data were processed using the Rosetta Resolver搴?system. Rosetta's custom feature extraction software performs error modeling before data are loaded into the Resolver system. The Resolver system performs a squeeze operation that combines replicates of the	GPL13425	Michael,,Nebozhyn	GpGx/Computational System biology	Merck, Inc	Mail Stop WP53B-120, 770 Sumneytown Pike, Building 53, P.O. Box 4	West Point	PA	19486	USA	ftp://ftp.ncbi.nlm.nih.gov/geo/samples/GSM711nnn/GSM711511/suppl/GSM711511_16011454042980_1_1.txt.gz	ftp://ftp.ncbi.nlm.nih.gov/geo/samples/GSM711nnn/GSM711511/suppl/GSM711511_16011454042981_1_1.txt.gz	23698	64	C
GSM711512	colon carcinoma_3146	GSM711512	Public on Apr 25 2011	Apr 19 2011	Apr 25 2011	RNA	2	pool of individual tumors	Homo sapiens	sample type: reference	total RNA	Total RNA was isolated from the adipose samples by Qiagen RNeasy spin columns with DNAse treatment. 2 纰実 of each sample was precipitated in ethanol and re-suspended in 14 纰宭 of water. Globin mitigation performed using Ambion's GLOBINclear kit (cat# AM1	Cy3	Custom automated version of the aminoallyl MessageAmp II kit from Ambion	9606	colon carcinoma_3146	Homo sapiens	Stage: 2	overall survival (years): 2.58	overall survival censor (1-censored,0-non-censored): 1	metastasis (1-yes, 0-no): 0	time to metastasis (years): N/A	time to recurrence (years): 2.58	age at diagnosis: 74	tumor location: sigmoid	duke's stage: B	total RNA	Total RNA was isolated from the adipose samples by Qiagen RNeasy spin columns with DNAse treatment. 2 纰実 of each sample was precipitated in ethanol and re-suspended in 14 纰宭 of water. Globin mitigation performed using Ambion's GLOBINclear kit (cat# AM1	Cy5	Custom automated version of the aminoallyl MessageAmp II kit from Ambion	9606	Microarrays are incubated at 40鎺矯 for 48 hours in a rotating carousel. Hybridizations to custom Agilent microarrays are completed as previously described (Hughes et al.Nat Biotech (2001), 19(4):342-7). Microarrays are washed to remove non-specific hybrid	Microarrays are scanned using the Agilent LP2 laser scanner. The scanner output is a Tiff file, which contains the quantitative hybridization data from each individual microarray. The Tiff files are then processed using Rosetta custom feature extraction s	human colorectal tumor RNA	Data were processed using the Rosetta Resolver搴?system. Rosetta's custom feature extraction software performs error modeling before data are loaded into the Resolver system. The Resolver system performs a squeeze operation that combines replicates of the	GPL13425	Michael,,Nebozhyn	GpGx/Computational System biology	Merck, Inc	Mail Stop WP53B-120, 770 Sumneytown Pike, Building 53, P.O. Box 4	West Point	PA	19486	USA	ftp://ftp.ncbi.nlm.nih.gov/geo/samples/GSM711nnn/GSM711512/suppl/GSM711512_16011454042982_1_1.txt.gz	ftp://ftp.ncbi.nlm.nih.gov/geo/samples/GSM711nnn/GSM711512/suppl/GSM711512_16011454042983_1_1.txt.gz	23698	74	B
GSM711513	colon carcinoma_3207	GSM711513	Public on Apr 25 2011	Apr 19 2011	Apr 25 2011	RNA	2	pool of individual tumors	Homo sapiens	sample type: reference	total RNA	Total RNA was isolated from the adipose samples by Qiagen RNeasy spin columns with DNAse treatment. 2 纰実 of each sample was precipitated in ethanol and re-suspended in 14 纰宭 of water. Globin mitigation performed using Ambion's GLOBINclear kit (cat# AM1	Cy3	Custom automated version of the aminoallyl MessageAmp II kit from Ambion	9606	colon carcinoma_3207	Homo sapiens	Stage: 2	overall survival (years): 7.86	overall survival censor (1-censored,0-non-censored): 1	metastasis (1-yes, 0-no): 0	time to metastasis (years): N/A	time to recurrence (years): 7.86	age at diagnosis: 70	tumor location: transvers	duke's stage: B	total RNA	Total RNA was isolated from the adipose samples by Qiagen RNeasy spin columns with DNAse treatment. 2 纰実 of each sample was precipitated in ethanol and re-suspended in 14 纰宭 of water. Globin mitigation performed using Ambion's GLOBINclear kit (cat# AM1	Cy5	Custom automated version of the aminoallyl MessageAmp II kit from Ambion	9606	Microarrays are incubated at 40鎺矯 for 48 hours in a rotating carousel. Hybridizations to custom Agilent microarrays are completed as previously described (Hughes et al.Nat Biotech (2001), 19(4):342-7). Microarrays are washed to remove non-specific hybrid	Microarrays are scanned using the Agilent LP2 laser scanner. The scanner output is a Tiff file, which contains the quantitative hybridization data from each individual microarray. The Tiff files are then processed using Rosetta custom feature extraction s	human colorectal tumor RNA	Data were processed using the Rosetta Resolver搴?system. Rosetta's custom feature extraction software performs error modeling before data are loaded into the Resolver system. The Resolver system performs a squeeze operation that combines replicates of the	GPL13425	Michael,,Nebozhyn	GpGx/Computational System biology	Merck, Inc	Mail Stop WP53B-120, 770 Sumneytown Pike, Building 53, P.O. Box 4	West Point	PA	19486	USA	ftp://ftp.ncbi.nlm.nih.gov/geo/samples/GSM711nnn/GSM711513/suppl/GSM711513_16011454042675_1_1.txt.gz	ftp://ftp.ncbi.nlm.nih.gov/geo/samples/GSM711nnn/GSM711513/suppl/GSM711513_16011454042676_1_1.txt.gz	23698	70	B
GSM711514	colon carcinoma_3187	GSM711514	Public on Apr 25 2011	Apr 19 2011	Apr 25 2011	RNA	2	pool of individual tumors	Homo sapiens	sample type: reference	total RNA	Total RNA was isolated from the adipose samples by Qiagen RNeasy spin columns with DNAse treatment. 2 纰実 of each sample was precipitated in ethanol and re-suspended in 14 纰宭 of water. Globin mitigation performed using Ambion's GLOBINclear kit (cat# AM1	Cy3	Custom automated version of the aminoallyl MessageAmp II kit from Ambion	9606	colon carcinoma_3187	Homo sapiens	Stage: 3	overall survival (years): 0.58	overall survival censor (1-censored,0-non-censored): 1	metastasis (1-yes, 0-no): 0	time to metastasis (years): N/A	time to recurrence (years): 0.58	age at diagnosis: 69	tumor location: coecum	duke's stage: C	total RNA	Total RNA was isolated from the adipose samples by Qiagen RNeasy spin columns with DNAse treatment. 2 纰実 of each sample was precipitated in ethanol and re-suspended in 14 纰宭 of water. Globin mitigation performed using Ambion's GLOBINclear kit (cat# AM1	Cy5	Custom automated version of the aminoallyl MessageAmp II kit from Ambion	9606	Microarrays are incubated at 40鎺矯 for 48 hours in a rotating carousel. Hybridizations to custom Agilent microarrays are completed as previously described (Hughes et al.Nat Biotech (2001), 19(4):342-7). Microarrays are washed to remove non-specific hybrid	Microarrays are scanned using the Agilent LP2 laser scanner. The scanner output is a Tiff file, which contains the quantitative hybridization data from each individual microarray. The Tiff files are then processed using Rosetta custom feature extraction s	human colorectal tumor RNA	Data were processed using the Rosetta Resolver搴?system. Rosetta's custom feature extraction software performs error modeling before data are loaded into the Resolver system. The Resolver system performs a squeeze operation that combines replicates of the	GPL13425	Michael,,Nebozhyn	GpGx/Computational System biology	Merck, Inc	Mail Stop WP53B-120, 770 Sumneytown Pike, Building 53, P.O. Box 4	West Point	PA	19486	USA	ftp://ftp.ncbi.nlm.nih.gov/geo/samples/GSM711nnn/GSM711514/suppl/GSM711514_16011454042673_1_1.txt.gz	ftp://ftp.ncbi.nlm.nih.gov/geo/samples/GSM711nnn/GSM711514/suppl/GSM711514_16011454042674_1_1.txt.gz	23698	69	C
GSM711515	colon carcinoma_3148	GSM711515	Public on Apr 25 2011	Apr 19 2011	Apr 25 2011	RNA	2	pool of individual tumors	Homo sapiens	sample type: reference	total RNA	Total RNA was isolated from the adipose samples by Qiagen RNeasy spin columns with DNAse treatment. 2 纰実 of each sample was precipitated in ethanol and re-suspended in 14 纰宭 of water. Globin mitigation performed using Ambion's GLOBINclear kit (cat# AM1	Cy3	Custom automated version of the aminoallyl MessageAmp II kit from Ambion	9606	colon carcinoma_3148	Homo sapiens	Stage: 4	overall survival (years): 1.08	overall survival censor (1-censored,0-non-censored): 0	metastasis (1-yes, 0-no): 0	time to metastasis (years): N/A	time to recurrence (years): 1.08	age at diagnosis: 42	tumor location: transvers	duke's stage: D	total RNA	Total RNA was isolated from the adipose samples by Qiagen RNeasy spin columns with DNAse treatment. 2 纰実 of each sample was precipitated in ethanol and re-suspended in 14 纰宭 of water. Globin mitigation performed using Ambion's GLOBINclear kit (cat# AM1	Cy5	Custom automated version of the aminoallyl MessageAmp II kit from Ambion	9606	Microarrays are incubated at 40鎺矯 for 48 hours in a rotating carousel. Hybridizations to custom Agilent microarrays are completed as previously described (Hughes et al.Nat Biotech (2001), 19(4):342-7). Microarrays are washed to remove non-specific hybrid	Microarrays are scanned using the Agilent LP2 laser scanner. The scanner output is a Tiff file, which contains the quantitative hybridization data from each individual microarray. The Tiff files are then processed using Rosetta custom feature extraction s	human colorectal tumor RNA	Data were processed using the Rosetta Resolver搴?system. Rosetta's custom feature extraction software performs error modeling before data are loaded into the Resolver system. The Resolver system performs a squeeze operation that combines replicates of the	GPL13425	Michael,,Nebozhyn	GpGx/Computational System biology	Merck, Inc	Mail Stop WP53B-120, 770 Sumneytown Pike, Building 53, P.O. Box 4	West Point	PA	19486	USA	ftp://ftp.ncbi.nlm.nih.gov/geo/samples/GSM711nnn/GSM711515/suppl/GSM711515_16011454043028_1_1.txt.gz	ftp://ftp.ncbi.nlm.nih.gov/geo/samples/GSM711nnn/GSM711515/suppl/GSM711515_16011454043029_1_1.txt.gz	23698	42	D
GSM711516	colon carcinoma_3111	GSM711516	Public on Apr 25 2011	Apr 19 2011	Apr 25 2011	RNA	2	pool of individual tumors	Homo sapiens	sample type: reference	total RNA	Total RNA was isolated from the adipose samples by Qiagen RNeasy spin columns with DNAse treatment. 2 纰実 of each sample was precipitated in ethanol and re-suspended in 14 纰宭 of water. Globin mitigation performed using Ambion's GLOBINclear kit (cat# AM1	Cy3	Custom automated version of the aminoallyl MessageAmp II kit from Ambion	9606	colon carcinoma_3111	Homo sapiens	Stage: 2	overall survival (years): 8.36	overall survival censor (1-censored,0-non-censored): 1	metastasis (1-yes, 0-no): 0	time to metastasis (years): N/A	time to recurrence (years): 8.36	age at diagnosis: 49	tumor location: ascend	duke's stage: B	total RNA	Total RNA was isolated from the adipose samples by Qiagen RNeasy spin columns with DNAse treatment. 2 纰実 of each sample was precipitated in ethanol and re-suspended in 14 纰宭 of water. Globin mitigation performed using Ambion's GLOBINclear kit (cat# AM1	Cy5	Custom automated version of the aminoallyl MessageAmp II kit from Ambion	9606	Microarrays are incubated at 40鎺矯 for 48 hours in a rotating carousel. Hybridizations to custom Agilent microarrays are completed as previously described (Hughes et al.Nat Biotech (2001), 19(4):342-7). Microarrays are washed to remove non-specific hybrid	Microarrays are scanned using the Agilent LP2 laser scanner. The scanner output is a Tiff file, which contains the quantitative hybridization data from each individual microarray. The Tiff files are then processed using Rosetta custom feature extraction s	human colorectal tumor RNA	Data were processed using the Rosetta Resolver搴?system. Rosetta's custom feature extraction software performs error modeling before data are loaded into the Resolver system. The Resolver system performs a squeeze operation that combines replicates of the	GPL13425	Michael,,Nebozhyn	GpGx/Computational System biology	Merck, Inc	Mail Stop WP53B-120, 770 Sumneytown Pike, Building 53, P.O. Box 4	West Point	PA	19486	USA	ftp://ftp.ncbi.nlm.nih.gov/geo/samples/GSM711nnn/GSM711516/suppl/GSM711516_16011454042641_1_1.txt.gz	ftp://ftp.ncbi.nlm.nih.gov/geo/samples/GSM711nnn/GSM711516/suppl/GSM711516_16011454042642_1_1.txt.gz	23698	49	B
GSM711517	colon carcinoma_3113	GSM711517	Public on Apr 25 2011	Apr 19 2011	Apr 25 2011	RNA	2	pool of individual tumors	Homo sapiens	sample type: reference	total RNA	Total RNA was isolated from the adipose samples by Qiagen RNeasy spin columns with DNAse treatment. 2 纰実 of each sample was precipitated in ethanol and re-suspended in 14 纰宭 of water. Globin mitigation performed using Ambion's GLOBINclear kit (cat# AM1	Cy3	Custom automated version of the aminoallyl MessageAmp II kit from Ambion	9606	colon carcinoma_3113	Homo sapiens	Stage: 2	overall survival (years): 6.10	overall survival censor (1-censored,0-non-censored): 1	metastasis (1-yes, 0-no): 0	time to metastasis (years): N/A	time to recurrence (years): 6.10	age at diagnosis: 67	tumor location: coecum	duke's stage: B	total RNA	Total RNA was isolated from the adipose samples by Qiagen RNeasy spin columns with DNAse treatment. 2 纰実 of each sample was precipitated in ethanol and re-suspended in 14 纰宭 of water. Globin mitigation performed using Ambion's GLOBINclear kit (cat# AM1	Cy5	Custom automated version of the aminoallyl MessageAmp II kit from Ambion	9606	Microarrays are incubated at 40鎺矯 for 48 hours in a rotating carousel. Hybridizations to custom Agilent microarrays are completed as previously described (Hughes et al.Nat Biotech (2001), 19(4):342-7). Microarrays are washed to remove non-specific hybrid	Microarrays are scanned using the Agilent LP2 laser scanner. The scanner output is a Tiff file, which contains the quantitative hybridization data from each individual microarray. The Tiff files are then processed using Rosetta custom feature extraction s	human colorectal tumor RNA	Data were processed using the Rosetta Resolver搴?system. Rosetta's custom feature extraction software performs error modeling before data are loaded into the Resolver system. The Resolver system performs a squeeze operation that combines replicates of the	GPL13425	Michael,,Nebozhyn	GpGx/Computational System biology	Merck, Inc	Mail Stop WP53B-120, 770 Sumneytown Pike, Building 53, P.O. Box 4	West Point	PA	19486	USA	ftp://ftp.ncbi.nlm.nih.gov/geo/samples/GSM711nnn/GSM711517/suppl/GSM711517_16011454042638_1_1.txt.gz	ftp://ftp.ncbi.nlm.nih.gov/geo/samples/GSM711nnn/GSM711517/suppl/GSM711517_16011454042640_1_1.txt.gz	23698	67	B
GSM711518	colon carcinoma_3151	GSM711518	Public on Apr 25 2011	Apr 19 2011	Apr 25 2011	RNA	2	pool of individual tumors	Homo sapiens	sample type: reference	total RNA	Total RNA was isolated from the adipose samples by Qiagen RNeasy spin columns with DNAse treatment. 2 纰実 of each sample was precipitated in ethanol and re-suspended in 14 纰宭 of water. Globin mitigation performed using Ambion's GLOBINclear kit (cat# AM1	Cy3	Custom automated version of the aminoallyl MessageAmp II kit from Ambion	9606	colon carcinoma_3151	Homo sapiens	Stage: N/A	overall survival (years): 0.17	overall survival censor (1-censored,0-non-censored): 1	metastasis (1-yes, 0-no): 0	time to metastasis (years): N/A	time to recurrence (years): 0.17	age at diagnosis: 54	tumor location: sigmoid	duke's stage: B	total RNA	Total RNA was isolated from the adipose samples by Qiagen RNeasy spin columns with DNAse treatment. 2 纰実 of each sample was precipitated in ethanol and re-suspended in 14 纰宭 of water. Globin mitigation performed using Ambion's GLOBINclear kit (cat# AM1	Cy5	Custom automated version of the aminoallyl MessageAmp II kit from Ambion	9606	Microarrays are incubated at 40鎺矯 for 48 hours in a rotating carousel. Hybridizations to custom Agilent microarrays are completed as previously described (Hughes et al.Nat Biotech (2001), 19(4):342-7). Microarrays are washed to remove non-specific hybrid	Microarrays are scanned using the Agilent LP2 laser scanner. The scanner output is a Tiff file, which contains the quantitative hybridization data from each individual microarray. The Tiff files are then processed using Rosetta custom feature extraction s	human colorectal tumor RNA	Data were processed using the Rosetta Resolver搴?system. Rosetta's custom feature extraction software performs error modeling before data are loaded into the Resolver system. The Resolver system performs a squeeze operation that combines replicates of the	GPL13425	Michael,,Nebozhyn	GpGx/Computational System biology	Merck, Inc	Mail Stop WP53B-120, 770 Sumneytown Pike, Building 53, P.O. Box 4	West Point	PA	19486	USA	ftp://ftp.ncbi.nlm.nih.gov/geo/samples/GSM711nnn/GSM711518/suppl/GSM711518_16011454042940_1_1.txt.gz	ftp://ftp.ncbi.nlm.nih.gov/geo/samples/GSM711nnn/GSM711518/suppl/GSM711518_16011454042941_1_1.txt.gz	23698	54	B
GSM711519	colon carcinoma_3152	GSM711519	Public on Apr 25 2011	Apr 19 2011	Apr 25 2011	RNA	2	pool of individual tumors	Homo sapiens	sample type: reference	total RNA	Total RNA was isolated from the adipose samples by Qiagen RNeasy spin columns with DNAse treatment. 2 纰実 of each sample was precipitated in ethanol and re-suspended in 14 纰宭 of water. Globin mitigation performed using Ambion's GLOBINclear kit (cat# AM1	Cy3	Custom automated version of the aminoallyl MessageAmp II kit from Ambion	9606	colon carcinoma_3152	Homo sapiens	Stage: 3	overall survival (years): 0.75	overall survival censor (1-censored,0-non-censored): 1	metastasis (1-yes, 0-no): 0	time to metastasis (years): N/A	time to recurrence (years): 0.75	age at diagnosis: 74	tumor location: coecum	duke's stage: C	total RNA	Total RNA was isolated from the adipose samples by Qiagen RNeasy spin columns with DNAse treatment. 2 纰実 of each sample was precipitated in ethanol and re-suspended in 14 纰宭 of water. Globin mitigation performed using Ambion's GLOBINclear kit (cat# AM1	Cy5	Custom automated version of the aminoallyl MessageAmp II kit from Ambion	9606	Microarrays are incubated at 40鎺矯 for 48 hours in a rotating carousel. Hybridizations to custom Agilent microarrays are completed as previously described (Hughes et al.Nat Biotech (2001), 19(4):342-7). Microarrays are washed to remove non-specific hybrid	Microarrays are scanned using the Agilent LP2 laser scanner. The scanner output is a Tiff file, which contains the quantitative hybridization data from each individual microarray. The Tiff files are then processed using Rosetta custom feature extraction s	human colorectal tumor RNA	Data were processed using the Rosetta Resolver搴?system. Rosetta's custom feature extraction software performs error modeling before data are loaded into the Resolver system. The Resolver system performs a squeeze operation that combines replicates of the	GPL13425	Michael,,Nebozhyn	GpGx/Computational System biology	Merck, Inc	Mail Stop WP53B-120, 770 Sumneytown Pike, Building 53, P.O. Box 4	West Point	PA	19486	USA	ftp://ftp.ncbi.nlm.nih.gov/geo/samples/GSM711nnn/GSM711519/suppl/GSM711519_16011454042681_1_1.txt.gz	ftp://ftp.ncbi.nlm.nih.gov/geo/samples/GSM711nnn/GSM711519/suppl/GSM711519_16011454042682_1_1.txt.gz	23698	74	C
GSM711520	colon carcinoma_3153	GSM711520	Public on Apr 25 2011	Apr 19 2011	Apr 25 2011	RNA	2	pool of individual tumors	Homo sapiens	sample type: reference	total RNA	Total RNA was isolated from the adipose samples by Qiagen RNeasy spin columns with DNAse treatment. 2 纰実 of each sample was precipitated in ethanol and re-suspended in 14 纰宭 of water. Globin mitigation performed using Ambion's GLOBINclear kit (cat# AM1	Cy3	Custom automated version of the aminoallyl MessageAmp II kit from Ambion	9606	colon carcinoma_3153	Homo sapiens	Stage: 2	overall survival (years): 4.74	overall survival censor (1-censored,0-non-censored): 1	metastasis (1-yes, 0-no): 0	time to metastasis (years): N/A	time to recurrence (years): 4.74	age at diagnosis: 55	tumor location: sigmoid	duke's stage: B	total RNA	Total RNA was isolated from the adipose samples by Qiagen RNeasy spin columns with DNAse treatment. 2 纰実 of each sample was precipitated in ethanol and re-suspended in 14 纰宭 of water. Globin mitigation performed using Ambion's GLOBINclear kit (cat# AM1	Cy5	Custom automated version of the aminoallyl MessageAmp II kit from Ambion	9606	Microarrays are incubated at 40鎺矯 for 48 hours in a rotating carousel. Hybridizations to custom Agilent microarrays are completed as previously described (Hughes et al.Nat Biotech (2001), 19(4):342-7). Microarrays are washed to remove non-specific hybrid	Microarrays are scanned using the Agilent LP2 laser scanner. The scanner output is a Tiff file, which contains the quantitative hybridization data from each individual microarray. The Tiff files are then processed using Rosetta custom feature extraction s	human colorectal tumor RNA	Data were processed using the Rosetta Resolver搴?system. Rosetta's custom feature extraction software performs error modeling before data are loaded into the Resolver system. The Resolver system performs a squeeze operation that combines replicates of the	GPL13425	Michael,,Nebozhyn	GpGx/Computational System biology	Merck, Inc	Mail Stop WP53B-120, 770 Sumneytown Pike, Building 53, P.O. Box 4	West Point	PA	19486	USA	ftp://ftp.ncbi.nlm.nih.gov/geo/samples/GSM711nnn/GSM711520/suppl/GSM711520_16011454042679_1_1.txt.gz	ftp://ftp.ncbi.nlm.nih.gov/geo/samples/GSM711nnn/GSM711520/suppl/GSM711520_16011454042680_1_1.txt.gz	23698	55	B
GSM711521	colon carcinoma_3154	GSM711521	Public on Apr 25 2011	Apr 19 2011	Apr 25 2011	RNA	2	pool of individual tumors	Homo sapiens	sample type: reference	total RNA	Total RNA was isolated from the adipose samples by Qiagen RNeasy spin columns with DNAse treatment. 2 纰実 of each sample was precipitated in ethanol and re-suspended in 14 纰宭 of water. Globin mitigation performed using Ambion's GLOBINclear kit (cat# AM1	Cy3	Custom automated version of the aminoallyl MessageAmp II kit from Ambion	9606	colon carcinoma_3154	Homo sapiens	Stage: 4	overall survival (years): 0.92	overall survival censor (1-censored,0-non-censored): 0	metastasis (1-yes, 0-no): 1	time to metastasis (years): 0.25	time to recurrence (years): 0.25	age at diagnosis: 66	tumor location: ascend	duke's stage: C	total RNA	Total RNA was isolated from the adipose samples by Qiagen RNeasy spin columns with DNAse treatment. 2 纰実 of each sample was precipitated in ethanol and re-suspended in 14 纰宭 of water. Globin mitigation performed using Ambion's GLOBINclear kit (cat# AM1	Cy5	Custom automated version of the aminoallyl MessageAmp II kit from Ambion	9606	Microarrays are incubated at 40鎺矯 for 48 hours in a rotating carousel. Hybridizations to custom Agilent microarrays are completed as previously described (Hughes et al.Nat Biotech (2001), 19(4):342-7). Microarrays are washed to remove non-specific hybrid	Microarrays are scanned using the Agilent LP2 laser scanner. The scanner output is a Tiff file, which contains the quantitative hybridization data from each individual microarray. The Tiff files are then processed using Rosetta custom feature extraction s	human colorectal tumor RNA	Data were processed using the Rosetta Resolver搴?system. Rosetta's custom feature extraction software performs error modeling before data are loaded into the Resolver system. The Resolver system performs a squeeze operation that combines replicates of the	GPL13425	Michael,,Nebozhyn	GpGx/Computational System biology	Merck, Inc	Mail Stop WP53B-120, 770 Sumneytown Pike, Building 53, P.O. Box 4	West Point	PA	19486	USA	ftp://ftp.ncbi.nlm.nih.gov/geo/samples/GSM711nnn/GSM711521/suppl/GSM711521_16011454042677_1_1.txt.gz	ftp://ftp.ncbi.nlm.nih.gov/geo/samples/GSM711nnn/GSM711521/suppl/GSM711521_16011454042678_1_1.txt.gz	23698	66	C
GSM711522	colon carcinoma_3223	GSM711522	Public on Apr 25 2011	Apr 19 2011	Apr 25 2011	RNA	2	pool of individual tumors	Homo sapiens	sample type: reference	total RNA	Total RNA was isolated from the adipose samples by Qiagen RNeasy spin columns with DNAse treatment. 2 纰実 of each sample was precipitated in ethanol and re-suspended in 14 纰宭 of water. Globin mitigation performed using Ambion's GLOBINclear kit (cat# AM1	Cy3	Custom automated version of the aminoallyl MessageAmp II kit from Ambion	9606	colon carcinoma_3223	Homo sapiens	Stage: 2	overall survival (years): 0.42	overall survival censor (1-censored,0-non-censored): 1	metastasis (1-yes, 0-no): 1	time to metastasis (years): 0.25	time to recurrence (years): 0.25	age at diagnosis: 73	tumor location: sigmoid	duke's stage: B	total RNA	Total RNA was isolated from the adipose samples by Qiagen RNeasy spin columns with DNAse treatment. 2 纰実 of each sample was precipitated in ethanol and re-suspended in 14 纰宭 of water. Globin mitigation performed using Ambion's GLOBINclear kit (cat# AM1	Cy5	Custom automated version of the aminoallyl MessageAmp II kit from Ambion	9606	Microarrays are incubated at 40鎺矯 for 48 hours in a rotating carousel. Hybridizations to custom Agilent microarrays are completed as previously described (Hughes et al.Nat Biotech (2001), 19(4):342-7). Microarrays are washed to remove non-specific hybrid	Microarrays are scanned using the Agilent LP2 laser scanner. The scanner output is a Tiff file, which contains the quantitative hybridization data from each individual microarray. The Tiff files are then processed using Rosetta custom feature extraction s	human colorectal tumor RNA	Data were processed using the Rosetta Resolver搴?system. Rosetta's custom feature extraction software performs error modeling before data are loaded into the Resolver system. The Resolver system performs a squeeze operation that combines replicates of the	GPL13425	Michael,,Nebozhyn	GpGx/Computational System biology	Merck, Inc	Mail Stop WP53B-120, 770 Sumneytown Pike, Building 53, P.O. Box 4	West Point	PA	19486	USA	ftp://ftp.ncbi.nlm.nih.gov/geo/samples/GSM711nnn/GSM711522/suppl/GSM711522_16011454043026_1_1.txt.gz	ftp://ftp.ncbi.nlm.nih.gov/geo/samples/GSM711nnn/GSM711522/suppl/GSM711522_16011454043027_1_1.txt.gz	23698	73	B
GSM711523	colon carcinoma_3209	GSM711523	Public on Apr 25 2011	Apr 19 2011	Apr 25 2011	RNA	2	pool of individual tumors	Homo sapiens	sample type: reference	total RNA	Total RNA was isolated from the adipose samples by Qiagen RNeasy spin columns with DNAse treatment. 2 纰実 of each sample was precipitated in ethanol and re-suspended in 14 纰宭 of water. Globin mitigation performed using Ambion's GLOBINclear kit (cat# AM1	Cy3	Custom automated version of the aminoallyl MessageAmp II kit from Ambion	9606	colon carcinoma_3209	Homo sapiens	Stage: 2	overall survival (years): 0.08	overall survival censor (1-censored,0-non-censored): 1	metastasis (1-yes, 0-no): 0	time to metastasis (years): N/A	time to recurrence (years): 0.08	age at diagnosis: 89	tumor location: ascend	duke's stage: B	total RNA	Total RNA was isolated from the adipose samples by Qiagen RNeasy spin columns with DNAse treatment. 2 纰実 of each sample was precipitated in ethanol and re-suspended in 14 纰宭 of water. Globin mitigation performed using Ambion's GLOBINclear kit (cat# AM1	Cy5	Custom automated version of the aminoallyl MessageAmp II kit from Ambion	9606	Microarrays are incubated at 40鎺矯 for 48 hours in a rotating carousel. Hybridizations to custom Agilent microarrays are completed as previously described (Hughes et al.Nat Biotech (2001), 19(4):342-7). Microarrays are washed to remove non-specific hybrid	Microarrays are scanned using the Agilent LP2 laser scanner. The scanner output is a Tiff file, which contains the quantitative hybridization data from each individual microarray. The Tiff files are then processed using Rosetta custom feature extraction s	human colorectal tumor RNA	Data were processed using the Rosetta Resolver搴?system. Rosetta's custom feature extraction software performs error modeling before data are loaded into the Resolver system. The Resolver system performs a squeeze operation that combines replicates of the	GPL13425	Michael,,Nebozhyn	GpGx/Computational System biology	Merck, Inc	Mail Stop WP53B-120, 770 Sumneytown Pike, Building 53, P.O. Box 4	West Point	PA	19486	USA	ftp://ftp.ncbi.nlm.nih.gov/geo/samples/GSM711nnn/GSM711523/suppl/GSM711523_16011454042739_1_1.txt.gz	ftp://ftp.ncbi.nlm.nih.gov/geo/samples/GSM711nnn/GSM711523/suppl/GSM711523_16011454042740_1_1.txt.gz	23698	89	B
GSM711524	colon carcinoma_3210	GSM711524	Public on Apr 25 2011	Apr 19 2011	Apr 25 2011	RNA	2	pool of individual tumors	Homo sapiens	sample type: reference	total RNA	Total RNA was isolated from the adipose samples by Qiagen RNeasy spin columns with DNAse treatment. 2 纰実 of each sample was precipitated in ethanol and re-suspended in 14 纰宭 of water. Globin mitigation performed using Ambion's GLOBINclear kit (cat# AM1	Cy3	Custom automated version of the aminoallyl MessageAmp II kit from Ambion	9606	colon carcinoma_3210	Homo sapiens	Stage: 2	overall survival (years): 0.08	overall survival censor (1-censored,0-non-censored): 1	metastasis (1-yes, 0-no): 0	time to metastasis (years): N/A	time to recurrence (years): 0.08	age at diagnosis: 86	tumor location: ascend	duke's stage: B	total RNA	Total RNA was isolated from the adipose samples by Qiagen RNeasy spin columns with DNAse treatment. 2 纰実 of each sample was precipitated in ethanol and re-suspended in 14 纰宭 of water. Globin mitigation performed using Ambion's GLOBINclear kit (cat# AM1	Cy5	Custom automated version of the aminoallyl MessageAmp II kit from Ambion	9606	Microarrays are incubated at 40鎺矯 for 48 hours in a rotating carousel. Hybridizations to custom Agilent microarrays are completed as previously described (Hughes et al.Nat Biotech (2001), 19(4):342-7). Microarrays are washed to remove non-specific hybrid	Microarrays are scanned using the Agilent LP2 laser scanner. The scanner output is a Tiff file, which contains the quantitative hybridization data from each individual microarray. The Tiff files are then processed using Rosetta custom feature extraction s	human colorectal tumor RNA	Data were processed using the Rosetta Resolver搴?system. Rosetta's custom feature extraction software performs error modeling before data are loaded into the Resolver system. The Resolver system performs a squeeze operation that combines replicates of the	GPL13425	Michael,,Nebozhyn	GpGx/Computational System biology	Merck, Inc	Mail Stop WP53B-120, 770 Sumneytown Pike, Building 53, P.O. Box 4	West Point	PA	19486	USA	ftp://ftp.ncbi.nlm.nih.gov/geo/samples/GSM711nnn/GSM711524/suppl/GSM711524_16011454042944_1_1.txt.gz	ftp://ftp.ncbi.nlm.nih.gov/geo/samples/GSM711nnn/GSM711524/suppl/GSM711524_16011454042945_1_1.txt.gz	23698	86	B
GSM711525	colon carcinoma_3188	GSM711525	Public on Apr 25 2011	Apr 19 2011	Apr 25 2011	RNA	2	pool of individual tumors	Homo sapiens	sample type: reference	total RNA	Total RNA was isolated from the adipose samples by Qiagen RNeasy spin columns with DNAse treatment. 2 纰実 of each sample was precipitated in ethanol and re-suspended in 14 纰宭 of water. Globin mitigation performed using Ambion's GLOBINclear kit (cat# AM1	Cy3	Custom automated version of the aminoallyl MessageAmp II kit from Ambion	9606	colon carcinoma_3188	Homo sapiens	Stage: 3	overall survival (years): 2.28	overall survival censor (1-censored,0-non-censored): 1	metastasis (1-yes, 0-no): 1	time to metastasis (years): 2.279452	time to recurrence (years): 2.28	age at diagnosis: 52	tumor location: coecum	duke's stage: C	total RNA	Total RNA was isolated from the adipose samples by Qiagen RNeasy spin columns with DNAse treatment. 2 纰実 of each sample was precipitated in ethanol and re-suspended in 14 纰宭 of water. Globin mitigation performed using Ambion's GLOBINclear kit (cat# AM1	Cy5	Custom automated version of the aminoallyl MessageAmp II kit from Ambion	9606	Microarrays are incubated at 40鎺矯 for 48 hours in a rotating carousel. Hybridizations to custom Agilent microarrays are completed as previously described (Hughes et al.Nat Biotech (2001), 19(4):342-7). Microarrays are washed to remove non-specific hybrid	Microarrays are scanned using the Agilent LP2 laser scanner. The scanner output is a Tiff file, which contains the quantitative hybridization data from each individual microarray. The Tiff files are then processed using Rosetta custom feature extraction s	human colorectal tumor RNA	Data were processed using the Rosetta Resolver搴?system. Rosetta's custom feature extraction software performs error modeling before data are loaded into the Resolver system. The Resolver system performs a squeeze operation that combines replicates of the	GPL13425	Michael,,Nebozhyn	GpGx/Computational System biology	Merck, Inc	Mail Stop WP53B-120, 770 Sumneytown Pike, Building 53, P.O. Box 4	West Point	PA	19486	USA	ftp://ftp.ncbi.nlm.nih.gov/geo/samples/GSM711nnn/GSM711525/suppl/GSM711525_16011454042942_1_1.txt.gz	ftp://ftp.ncbi.nlm.nih.gov/geo/samples/GSM711nnn/GSM711525/suppl/GSM711525_16011454042943_1_1.txt.gz	23698	52	C
GSM711526	colon carcinoma_3189	GSM711526	Public on Apr 25 2011	Apr 19 2011	Apr 25 2011	RNA	2	pool of individual tumors	Homo sapiens	sample type: reference	total RNA	Total RNA was isolated from the adipose samples by Qiagen RNeasy spin columns with DNAse treatment. 2 纰実 of each sample was precipitated in ethanol and re-suspended in 14 纰宭 of water. Globin mitigation performed using Ambion's GLOBINclear kit (cat# AM1	Cy3	Custom automated version of the aminoallyl MessageAmp II kit from Ambion	9606	colon carcinoma_3189	Homo sapiens	Stage: 3	overall survival (years): 3.15	overall survival censor (1-censored,0-non-censored): 1	metastasis (1-yes, 0-no): 0	time to metastasis (years): N/A	time to recurrence (years): 3.15	age at diagnosis: 82	tumor location: sigmoid	duke's stage: C	total RNA	Total RNA was isolated from the adipose samples by Qiagen RNeasy spin columns with DNAse treatment. 2 纰実 of each sample was precipitated in ethanol and re-suspended in 14 纰宭 of water. Globin mitigation performed using Ambion's GLOBINclear kit (cat# AM1	Cy5	Custom automated version of the aminoallyl MessageAmp II kit from Ambion	9606	Microarrays are incubated at 40鎺矯 for 48 hours in a rotating carousel. Hybridizations to custom Agilent microarrays are completed as previously described (Hughes et al.Nat Biotech (2001), 19(4):342-7). Microarrays are washed to remove non-specific hybrid	Microarrays are scanned using the Agilent LP2 laser scanner. The scanner output is a Tiff file, which contains the quantitative hybridization data from each individual microarray. The Tiff files are then processed using Rosetta custom feature extraction s	human colorectal tumor RNA	Data were processed using the Rosetta Resolver搴?system. Rosetta's custom feature extraction software performs error modeling before data are loaded into the Resolver system. The Resolver system performs a squeeze operation that combines replicates of the	GPL13425	Michael,,Nebozhyn	GpGx/Computational System biology	Merck, Inc	Mail Stop WP53B-120, 770 Sumneytown Pike, Building 53, P.O. Box 4	West Point	PA	19486	USA	ftp://ftp.ncbi.nlm.nih.gov/geo/samples/GSM711nnn/GSM711526/suppl/GSM711526_16011454042986_1_1.txt.gz	ftp://ftp.ncbi.nlm.nih.gov/geo/samples/GSM711nnn/GSM711526/suppl/GSM711526_16011454042987_1_1.txt.gz	23698	82	C
GSM711527	colon carcinoma_3190	GSM711527	Public on Apr 25 2011	Apr 19 2011	Apr 25 2011	RNA	2	pool of individual tumors	Homo sapiens	sample type: reference	total RNA	Total RNA was isolated from the adipose samples by Qiagen RNeasy spin columns with DNAse treatment. 2 纰実 of each sample was precipitated in ethanol and re-suspended in 14 纰宭 of water. Globin mitigation performed using Ambion's GLOBINclear kit (cat# AM1	Cy3	Custom automated version of the aminoallyl MessageAmp II kit from Ambion	9606	colon carcinoma_3190	Homo sapiens	Stage: 3	overall survival (years): 1.74	overall survival censor (1-censored,0-non-censored): 1	metastasis (1-yes, 0-no): 1	time to metastasis (years): 1.7369863	time to recurrence (years): 1.74	age at diagnosis: 63	tumor location: ascend	duke's stage: C	total RNA	Total RNA was isolated from the adipose samples by Qiagen RNeasy spin columns with DNAse treatment. 2 纰実 of each sample was precipitated in ethanol and re-suspended in 14 纰宭 of water. Globin mitigation performed using Ambion's GLOBINclear kit (cat# AM1	Cy5	Custom automated version of the aminoallyl MessageAmp II kit from Ambion	9606	Microarrays are incubated at 40鎺矯 for 48 hours in a rotating carousel. Hybridizations to custom Agilent microarrays are completed as previously described (Hughes et al.Nat Biotech (2001), 19(4):342-7). Microarrays are washed to remove non-specific hybrid	Microarrays are scanned using the Agilent LP2 laser scanner. The scanner output is a Tiff file, which contains the quantitative hybridization data from each individual microarray. The Tiff files are then processed using Rosetta custom feature extraction s	human colorectal tumor RNA	Data were processed using the Rosetta Resolver搴?system. Rosetta's custom feature extraction software performs error modeling before data are loaded into the Resolver system. The Resolver system performs a squeeze operation that combines replicates of the	GPL13425	Michael,,Nebozhyn	GpGx/Computational System biology	Merck, Inc	Mail Stop WP53B-120, 770 Sumneytown Pike, Building 53, P.O. Box 4	West Point	PA	19486	USA	ftp://ftp.ncbi.nlm.nih.gov/geo/samples/GSM711nnn/GSM711527/suppl/GSM711527_16011454043024_1_1.txt.gz	ftp://ftp.ncbi.nlm.nih.gov/geo/samples/GSM711nnn/GSM711527/suppl/GSM711527_16011454043025_1_1.txt.gz	23698	63	C
GSM711528	colon carcinoma_3191	GSM711528	Public on Apr 25 2011	Apr 19 2011	Apr 25 2011	RNA	2	pool of individual tumors	Homo sapiens	sample type: reference	total RNA	Total RNA was isolated from the adipose samples by Qiagen RNeasy spin columns with DNAse treatment. 2 纰実 of each sample was precipitated in ethanol and re-suspended in 14 纰宭 of water. Globin mitigation performed using Ambion's GLOBINclear kit (cat# AM1	Cy3	Custom automated version of the aminoallyl MessageAmp II kit from Ambion	9606	colon carcinoma_3191	Homo sapiens	Stage: 2	overall survival (years): 3.52	overall survival censor (1-censored,0-non-censored): 1	metastasis (1-yes, 0-no): 0	time to metastasis (years): N/A	time to recurrence (years): 3.52	age at diagnosis: 54	tumor location: sigmoid	duke's stage: B	total RNA	Total RNA was isolated from the adipose samples by Qiagen RNeasy spin columns with DNAse treatment. 2 纰実 of each sample was precipitated in ethanol and re-suspended in 14 纰宭 of water. Globin mitigation performed using Ambion's GLOBINclear kit (cat# AM1	Cy5	Custom automated version of the aminoallyl MessageAmp II kit from Ambion	9606	Microarrays are incubated at 40鎺矯 for 48 hours in a rotating carousel. Hybridizations to custom Agilent microarrays are completed as previously described (Hughes et al.Nat Biotech (2001), 19(4):342-7). Microarrays are washed to remove non-specific hybrid	Microarrays are scanned using the Agilent LP2 laser scanner. The scanner output is a Tiff file, which contains the quantitative hybridization data from each individual microarray. The Tiff files are then processed using Rosetta custom feature extraction s	human colorectal tumor RNA	Data were processed using the Rosetta Resolver搴?system. Rosetta's custom feature extraction software performs error modeling before data are loaded into the Resolver system. The Resolver system performs a squeeze operation that combines replicates of the	GPL13425	Michael,,Nebozhyn	GpGx/Computational System biology	Merck, Inc	Mail Stop WP53B-120, 770 Sumneytown Pike, Building 53, P.O. Box 4	West Point	PA	19486	USA	ftp://ftp.ncbi.nlm.nih.gov/geo/samples/GSM711nnn/GSM711528/suppl/GSM711528_16011454042988_1_1.txt.gz	ftp://ftp.ncbi.nlm.nih.gov/geo/samples/GSM711nnn/GSM711528/suppl/GSM711528_16011454042989_1_1.txt.gz	23698	54	B
GSM711529	colon carcinoma_3193	GSM711529	Public on Apr 25 2011	Apr 19 2011	Apr 25 2011	RNA	2	pool of individual tumors	Homo sapiens	sample type: reference	total RNA	Total RNA was isolated from the adipose samples by Qiagen RNeasy spin columns with DNAse treatment. 2 纰実 of each sample was precipitated in ethanol and re-suspended in 14 纰宭 of water. Globin mitigation performed using Ambion's GLOBINclear kit (cat# AM1	Cy3	Custom automated version of the aminoallyl MessageAmp II kit from Ambion	9606	colon carcinoma_3193	Homo sapiens	Stage: 1	overall survival (years): 2.76	overall survival censor (1-censored,0-non-censored): 1	metastasis (1-yes, 0-no): 0	time to metastasis (years): N/A	time to recurrence (years): 2.76	age at diagnosis: 63	tumor location: sigmoid	duke's stage: B	total RNA	Total RNA was isolated from the adipose samples by Qiagen RNeasy spin columns with DNAse treatment. 2 纰実 of each sample was precipitated in ethanol and re-suspended in 14 纰宭 of water. Globin mitigation performed using Ambion's GLOBINclear kit (cat# AM1	Cy5	Custom automated version of the aminoallyl MessageAmp II kit from Ambion	9606	Microarrays are incubated at 40鎺矯 for 48 hours in a rotating carousel. Hybridizations to custom Agilent microarrays are completed as previously described (Hughes et al.Nat Biotech (2001), 19(4):342-7). Microarrays are washed to remove non-specific hybrid	Microarrays are scanned using the Agilent LP2 laser scanner. The scanner output is a Tiff file, which contains the quantitative hybridization data from each individual microarray. The Tiff files are then processed using Rosetta custom feature extraction s	human colorectal tumor RNA	Data were processed using the Rosetta Resolver搴?system. Rosetta's custom feature extraction software performs error modeling before data are loaded into the Resolver system. The Resolver system performs a squeeze operation that combines replicates of the	GPL13425	Michael,,Nebozhyn	GpGx/Computational System biology	Merck, Inc	Mail Stop WP53B-120, 770 Sumneytown Pike, Building 53, P.O. Box 4	West Point	PA	19486	USA	ftp://ftp.ncbi.nlm.nih.gov/geo/samples/GSM711nnn/GSM711529/suppl/GSM711529_16011454042733_1_1.txt.gz	ftp://ftp.ncbi.nlm.nih.gov/geo/samples/GSM711nnn/GSM711529/suppl/GSM711529_16011454042734_1_1.txt.gz	23698	63	B
GSM711530	colon carcinoma_3244	GSM711530	Public on Apr 25 2011	Apr 19 2011	Apr 25 2011	RNA	2	pool of individual tumors	Homo sapiens	sample type: reference	total RNA	Total RNA was isolated from the adipose samples by Qiagen RNeasy spin columns with DNAse treatment. 2 纰実 of each sample was precipitated in ethanol and re-suspended in 14 纰宭 of water. Globin mitigation performed using Ambion's GLOBINclear kit (cat# AM1	Cy3	Custom automated version of the aminoallyl MessageAmp II kit from Ambion	9606	colon carcinoma_3244	Homo sapiens	Stage: 3	overall survival (years): 2.41	overall survival censor (1-censored,0-non-censored): 1	metastasis (1-yes, 0-no): 0	time to metastasis (years): N/A	time to recurrence (years): 2.41	age at diagnosis: 69	tumor location: coecum	duke's stage: C	total RNA	Total RNA was isolated from the adipose samples by Qiagen RNeasy spin columns with DNAse treatment. 2 纰実 of each sample was precipitated in ethanol and re-suspended in 14 纰宭 of water. Globin mitigation performed using Ambion's GLOBINclear kit (cat# AM1	Cy5	Custom automated version of the aminoallyl MessageAmp II kit from Ambion	9606	Microarrays are incubated at 40鎺矯 for 48 hours in a rotating carousel. Hybridizations to custom Agilent microarrays are completed as previously described (Hughes et al.Nat Biotech (2001), 19(4):342-7). Microarrays are washed to remove non-specific hybrid	Microarrays are scanned using the Agilent LP2 laser scanner. The scanner output is a Tiff file, which contains the quantitative hybridization data from each individual microarray. The Tiff files are then processed using Rosetta custom feature extraction s	human colorectal tumor RNA	Data were processed using the Rosetta Resolver搴?system. Rosetta's custom feature extraction software performs error modeling before data are loaded into the Resolver system. The Resolver system performs a squeeze operation that combines replicates of the	GPL13425	Michael,,Nebozhyn	GpGx/Computational System biology	Merck, Inc	Mail Stop WP53B-120, 770 Sumneytown Pike, Building 53, P.O. Box 4	West Point	PA	19486	USA	ftp://ftp.ncbi.nlm.nih.gov/geo/samples/GSM711nnn/GSM711530/suppl/GSM711530_16011454043236_1_1.txt.gz	ftp://ftp.ncbi.nlm.nih.gov/geo/samples/GSM711nnn/GSM711530/suppl/GSM711530_16011454043237_1_1.txt.gz	23698	69	C
GSM711531	colon carcinoma_3194	GSM711531	Public on Apr 25 2011	Apr 19 2011	Apr 25 2011	RNA	2	pool of individual tumors	Homo sapiens	sample type: reference	total RNA	Total RNA was isolated from the adipose samples by Qiagen RNeasy spin columns with DNAse treatment. 2 纰実 of each sample was precipitated in ethanol and re-suspended in 14 纰宭 of water. Globin mitigation performed using Ambion's GLOBINclear kit (cat# AM1	Cy3	Custom automated version of the aminoallyl MessageAmp II kit from Ambion	9606	colon carcinoma_3194	Homo sapiens	Stage: 2	overall survival (years): 0.92	overall survival censor (1-censored,0-non-censored): 1	metastasis (1-yes, 0-no): 1	time to metastasis (years): 0.583333333	time to recurrence (years): 0.58	age at diagnosis: 56	tumor location: sigmoid	duke's stage: B	total RNA	Total RNA was isolated from the adipose samples by Qiagen RNeasy spin columns with DNAse treatment. 2 纰実 of each sample was precipitated in ethanol and re-suspended in 14 纰宭 of water. Globin mitigation performed using Ambion's GLOBINclear kit (cat# AM1	Cy5	Custom automated version of the aminoallyl MessageAmp II kit from Ambion	9606	Microarrays are incubated at 40鎺矯 for 48 hours in a rotating carousel. Hybridizations to custom Agilent microarrays are completed as previously described (Hughes et al.Nat Biotech (2001), 19(4):342-7). Microarrays are washed to remove non-specific hybrid	Microarrays are scanned using the Agilent LP2 laser scanner. The scanner output is a Tiff file, which contains the quantitative hybridization data from each individual microarray. The Tiff files are then processed using Rosetta custom feature extraction s	human colorectal tumor RNA	Data were processed using the Rosetta Resolver搴?system. Rosetta's custom feature extraction software performs error modeling before data are loaded into the Resolver system. The Resolver system performs a squeeze operation that combines replicates of the	GPL13425	Michael,,Nebozhyn	GpGx/Computational System biology	Merck, Inc	Mail Stop WP53B-120, 770 Sumneytown Pike, Building 53, P.O. Box 4	West Point	PA	19486	USA	ftp://ftp.ncbi.nlm.nih.gov/geo/samples/GSM711nnn/GSM711531/suppl/GSM711531_16011454043234_1_1.txt.gz	ftp://ftp.ncbi.nlm.nih.gov/geo/samples/GSM711nnn/GSM711531/suppl/GSM711531_16011454043235_1_1.txt.gz	23698	56	B
GSM711532	colon carcinoma_3197	GSM711532	Public on Apr 25 2011	Apr 19 2011	Apr 25 2011	RNA	2	pool of individual tumors	Homo sapiens	sample type: reference	total RNA	Total RNA was isolated from the adipose samples by Qiagen RNeasy spin columns with DNAse treatment. 2 纰実 of each sample was precipitated in ethanol and re-suspended in 14 纰宭 of water. Globin mitigation performed using Ambion's GLOBINclear kit (cat# AM1	Cy3	Custom automated version of the aminoallyl MessageAmp II kit from Ambion	9606	colon carcinoma_3197	Homo sapiens	Stage: 1	overall survival (years): 2.00	overall survival censor (1-censored,0-non-censored): 1	metastasis (1-yes, 0-no): 0	time to metastasis (years): N/A	time to recurrence (years): 2.00	age at diagnosis: 50	tumor location: transvers	duke's stage: B	total RNA	Total RNA was isolated from the adipose samples by Qiagen RNeasy spin columns with DNAse treatment. 2 纰実 of each sample was precipitated in ethanol and re-suspended in 14 纰宭 of water. Globin mitigation performed using Ambion's GLOBINclear kit (cat# AM1	Cy5	Custom automated version of the aminoallyl MessageAmp II kit from Ambion	9606	Microarrays are incubated at 40鎺矯 for 48 hours in a rotating carousel. Hybridizations to custom Agilent microarrays are completed as previously described (Hughes et al.Nat Biotech (2001), 19(4):342-7). Microarrays are washed to remove non-specific hybrid	Microarrays are scanned using the Agilent LP2 laser scanner. The scanner output is a Tiff file, which contains the quantitative hybridization data from each individual microarray. The Tiff files are then processed using Rosetta custom feature extraction s	human colorectal tumor RNA	Data were processed using the Rosetta Resolver搴?system. Rosetta's custom feature extraction software performs error modeling before data are loaded into the Resolver system. The Resolver system performs a squeeze operation that combines replicates of the	GPL13425	Michael,,Nebozhyn	GpGx/Computational System biology	Merck, Inc	Mail Stop WP53B-120, 770 Sumneytown Pike, Building 53, P.O. Box 4	West Point	PA	19486	USA	ftp://ftp.ncbi.nlm.nih.gov/geo/samples/GSM711nnn/GSM711532/suppl/GSM711532_16011454043022_1_1.txt.gz	ftp://ftp.ncbi.nlm.nih.gov/geo/samples/GSM711nnn/GSM711532/suppl/GSM711532_16011454043023_1_1.txt.gz	23698	50	B
GSM711533	colon carcinoma_MS02	GSM711533	Public on Apr 25 2011	Apr 19 2011	Apr 25 2011	RNA	2	pool of individual tumors	Homo sapiens	sample type: reference	total RNA	Total RNA was isolated from the adipose samples by Qiagen RNeasy spin columns with DNAse treatment. 2 纰実 of each sample was precipitated in ethanol and re-suspended in 14 纰宭 of water. Globin mitigation performed using Ambion's GLOBINclear kit (cat# AM1	Cy3	Custom automated version of the aminoallyl MessageAmp II kit from Ambion	9606	colon carcinoma_MS02	Homo sapiens	Stage: 3	overall survival (years): 6.87	overall survival censor (1-censored,0-non-censored): 0	metastasis (1-yes, 0-no): 1	time to metastasis (years): 2.622861054	time to recurrence (years): 2.62	age at diagnosis: 64	tumor location: sigmoid	duke's stage: C	total RNA	Total RNA was isolated from the adipose samples by Qiagen RNeasy spin columns with DNAse treatment. 2 纰実 of each sample was precipitated in ethanol and re-suspended in 14 纰宭 of water. Globin mitigation performed using Ambion's GLOBINclear kit (cat# AM1	Cy5	Custom automated version of the aminoallyl MessageAmp II kit from Ambion	9606	Microarrays are incubated at 40鎺矯 for 48 hours in a rotating carousel. Hybridizations to custom Agilent microarrays are completed as previously described (Hughes et al.Nat Biotech (2001), 19(4):342-7). Microarrays are washed to remove non-specific hybrid	Microarrays are scanned using the Agilent LP2 laser scanner. The scanner output is a Tiff file, which contains the quantitative hybridization data from each individual microarray. The Tiff files are then processed using Rosetta custom feature extraction s	human colorectal tumor RNA	Data were processed using the Rosetta Resolver搴?system. Rosetta's custom feature extraction software performs error modeling before data are loaded into the Resolver system. The Resolver system performs a squeeze operation that combines replicates of the	GPL13425	Michael,,Nebozhyn	GpGx/Computational System biology	Merck, Inc	Mail Stop WP53B-120, 770 Sumneytown Pike, Building 53, P.O. Box 4	West Point	PA	19486	USA	ftp://ftp.ncbi.nlm.nih.gov/geo/samples/GSM711nnn/GSM711533/suppl/GSM711533_16011454043020_1_1.txt.gz	ftp://ftp.ncbi.nlm.nih.gov/geo/samples/GSM711nnn/GSM711533/suppl/GSM711533_16011454043021_1_1.txt.gz	23698	64	C
GSM711534	colon carcinoma_MS11	GSM711534	Public on Apr 25 2011	Apr 19 2011	Apr 25 2011	RNA	2	pool of individual tumors	Homo sapiens	sample type: reference	total RNA	Total RNA was isolated from the adipose samples by Qiagen RNeasy spin columns with DNAse treatment. 2 纰実 of each sample was precipitated in ethanol and re-suspended in 14 纰宭 of water. Globin mitigation performed using Ambion's GLOBINclear kit (cat# AM1	Cy3	Custom automated version of the aminoallyl MessageAmp II kit from Ambion	9606	colon carcinoma_MS11	Homo sapiens	Stage: 2	overall survival (years): 2.63	overall survival censor (1-censored,0-non-censored): 0	metastasis (1-yes, 0-no): 0	time to metastasis (years): N/A	time to recurrence (years): 2.63	age at diagnosis: 81	tumor location: coecum	duke's stage: C	total RNA	Total RNA was isolated from the adipose samples by Qiagen RNeasy spin columns with DNAse treatment. 2 纰実 of each sample was precipitated in ethanol and re-suspended in 14 纰宭 of water. Globin mitigation performed using Ambion's GLOBINclear kit (cat# AM1	Cy5	Custom automated version of the aminoallyl MessageAmp II kit from Ambion	9606	Microarrays are incubated at 40鎺矯 for 48 hours in a rotating carousel. Hybridizations to custom Agilent microarrays are completed as previously described (Hughes et al.Nat Biotech (2001), 19(4):342-7). Microarrays are washed to remove non-specific hybrid	Microarrays are scanned using the Agilent LP2 laser scanner. The scanner output is a Tiff file, which contains the quantitative hybridization data from each individual microarray. The Tiff files are then processed using Rosetta custom feature extraction s	human colorectal tumor RNA	Data were processed using the Rosetta Resolver搴?system. Rosetta's custom feature extraction software performs error modeling before data are loaded into the Resolver system. The Resolver system performs a squeeze operation that combines replicates of the	GPL13425	Michael,,Nebozhyn	GpGx/Computational System biology	Merck, Inc	Mail Stop WP53B-120, 770 Sumneytown Pike, Building 53, P.O. Box 4	West Point	PA	19486	USA	ftp://ftp.ncbi.nlm.nih.gov/geo/samples/GSM711nnn/GSM711534/suppl/GSM711534_16011454042889_1_1.txt.gz	ftp://ftp.ncbi.nlm.nih.gov/geo/samples/GSM711nnn/GSM711534/suppl/GSM711534_16011454042890_1_1.txt.gz	23698	81	C
GSM711535	colon carcinoma_MS21	GSM711535	Public on Apr 25 2011	Apr 19 2011	Apr 25 2011	RNA	2	pool of individual tumors	Homo sapiens	sample type: reference	total RNA	Total RNA was isolated from the adipose samples by Qiagen RNeasy spin columns with DNAse treatment. 2 纰実 of each sample was precipitated in ethanol and re-suspended in 14 纰宭 of water. Globin mitigation performed using Ambion's GLOBINclear kit (cat# AM1	Cy3	Custom automated version of the aminoallyl MessageAmp II kit from Ambion	9606	colon carcinoma_MS21	Homo sapiens	Stage: 2	overall survival (years): 14.32	overall survival censor (1-censored,0-non-censored): 1	metastasis (1-yes, 0-no): 0	time to metastasis (years): N/A	time to recurrence (years): 14.32	age at diagnosis: 42	tumor location: coecum	duke's stage: B	total RNA	Total RNA was isolated from the adipose samples by Qiagen RNeasy spin columns with DNAse treatment. 2 纰実 of each sample was precipitated in ethanol and re-suspended in 14 纰宭 of water. Globin mitigation performed using Ambion's GLOBINclear kit (cat# AM1	Cy5	Custom automated version of the aminoallyl MessageAmp II kit from Ambion	9606	Microarrays are incubated at 40鎺矯 for 48 hours in a rotating carousel. Hybridizations to custom Agilent microarrays are completed as previously described (Hughes et al.Nat Biotech (2001), 19(4):342-7). Microarrays are washed to remove non-specific hybrid	Microarrays are scanned using the Agilent LP2 laser scanner. The scanner output is a Tiff file, which contains the quantitative hybridization data from each individual microarray. The Tiff files are then processed using Rosetta custom feature extraction s	human colorectal tumor RNA	Data were processed using the Rosetta Resolver搴?system. Rosetta's custom feature extraction software performs error modeling before data are loaded into the Resolver system. The Resolver system performs a squeeze operation that combines replicates of the	GPL13425	Michael,,Nebozhyn	GpGx/Computational System biology	Merck, Inc	Mail Stop WP53B-120, 770 Sumneytown Pike, Building 53, P.O. Box 4	West Point	PA	19486	USA	ftp://ftp.ncbi.nlm.nih.gov/geo/samples/GSM711nnn/GSM711535/suppl/GSM711535_16011454042883_1_1.txt.gz	ftp://ftp.ncbi.nlm.nih.gov/geo/samples/GSM711nnn/GSM711535/suppl/GSM711535_16011454042884_1_1.txt.gz	23698	42	B
GSM711536	colon carcinoma_MS25	GSM711536	Public on Apr 25 2011	Apr 19 2011	Apr 25 2011	RNA	2	pool of individual tumors	Homo sapiens	sample type: reference	total RNA	Total RNA was isolated from the adipose samples by Qiagen RNeasy spin columns with DNAse treatment. 2 纰実 of each sample was precipitated in ethanol and re-suspended in 14 纰宭 of water. Globin mitigation performed using Ambion's GLOBINclear kit (cat# AM1	Cy3	Custom automated version of the aminoallyl MessageAmp II kit from Ambion	9606	colon carcinoma_MS25	Homo sapiens	Stage: 2	overall survival (years): 12.53	overall survival censor (1-censored,0-non-censored): 1	metastasis (1-yes, 0-no): 0	time to metastasis (years): N/A	time to recurrence (years): 12.53	age at diagnosis: 73	tumor location: transvers	duke's stage: B	total RNA	Total RNA was isolated from the adipose samples by Qiagen RNeasy spin columns with DNAse treatment. 2 纰実 of each sample was precipitated in ethanol and re-suspended in 14 纰宭 of water. Globin mitigation performed using Ambion's GLOBINclear kit (cat# AM1	Cy5	Custom automated version of the aminoallyl MessageAmp II kit from Ambion	9606	Microarrays are incubated at 40鎺矯 for 48 hours in a rotating carousel. Hybridizations to custom Agilent microarrays are completed as previously described (Hughes et al.Nat Biotech (2001), 19(4):342-7). Microarrays are washed to remove non-specific hybrid	Microarrays are scanned using the Agilent LP2 laser scanner. The scanner output is a Tiff file, which contains the quantitative hybridization data from each individual microarray. The Tiff files are then processed using Rosetta custom feature extraction s	human colorectal tumor RNA	Data were processed using the Rosetta Resolver搴?system. Rosetta's custom feature extraction software performs error modeling before data are loaded into the Resolver system. The Resolver system performs a squeeze operation that combines replicates of the	GPL13425	Michael,,Nebozhyn	GpGx/Computational System biology	Merck, Inc	Mail Stop WP53B-120, 770 Sumneytown Pike, Building 53, P.O. Box 4	West Point	PA	19486	USA	ftp://ftp.ncbi.nlm.nih.gov/geo/samples/GSM711nnn/GSM711536/suppl/GSM711536_16011454042887_1_1.txt.gz	ftp://ftp.ncbi.nlm.nih.gov/geo/samples/GSM711nnn/GSM711536/suppl/GSM711536_16011454042888_1_1.txt.gz	23698	73	B
GSM711537	colon carcinoma_MS26	GSM711537	Public on Apr 25 2011	Apr 19 2011	Apr 25 2011	RNA	2	pool of individual tumors	Homo sapiens	sample type: reference	total RNA	Total RNA was isolated from the adipose samples by Qiagen RNeasy spin columns with DNAse treatment. 2 纰実 of each sample was precipitated in ethanol and re-suspended in 14 纰宭 of water. Globin mitigation performed using Ambion's GLOBINclear kit (cat# AM1	Cy3	Custom automated version of the aminoallyl MessageAmp II kit from Ambion	9606	colon carcinoma_MS26	Homo sapiens	Stage: 2	overall survival (years): 3.66	overall survival censor (1-censored,0-non-censored): 0	metastasis (1-yes, 0-no): 1	time to metastasis (years): 3.58384668	time to recurrence (years): 2.51	age at diagnosis: 74	tumor location: ascend	duke's stage: B	total RNA	Total RNA was isolated from the adipose samples by Qiagen RNeasy spin columns with DNAse treatment. 2 纰実 of each sample was precipitated in ethanol and re-suspended in 14 纰宭 of water. Globin mitigation performed using Ambion's GLOBINclear kit (cat# AM1	Cy5	Custom automated version of the aminoallyl MessageAmp II kit from Ambion	9606	Microarrays are incubated at 40鎺矯 for 48 hours in a rotating carousel. Hybridizations to custom Agilent microarrays are completed as previously described (Hughes et al.Nat Biotech (2001), 19(4):342-7). Microarrays are washed to remove non-specific hybrid	Microarrays are scanned using the Agilent LP2 laser scanner. The scanner output is a Tiff file, which contains the quantitative hybridization data from each individual microarray. The Tiff files are then processed using Rosetta custom feature extraction s	human colorectal tumor RNA	Data were processed using the Rosetta Resolver搴?system. Rosetta's custom feature extraction software performs error modeling before data are loaded into the Resolver system. The Resolver system performs a squeeze operation that combines replicates of the	GPL13425	Michael,,Nebozhyn	GpGx/Computational System biology	Merck, Inc	Mail Stop WP53B-120, 770 Sumneytown Pike, Building 53, P.O. Box 4	West Point	PA	19486	USA	ftp://ftp.ncbi.nlm.nih.gov/geo/samples/GSM711nnn/GSM711537/suppl/GSM711537_16011454042777_1_1.txt.gz	ftp://ftp.ncbi.nlm.nih.gov/geo/samples/GSM711nnn/GSM711537/suppl/GSM711537_16011454042778_1_1.txt.gz	23698	74	B
GSM711538	colon carcinoma_MS29	GSM711538	Public on Apr 25 2011	Apr 19 2011	Apr 25 2011	RNA	2	pool of individual tumors	Homo sapiens	sample type: reference	total RNA	Total RNA was isolated from the adipose samples by Qiagen RNeasy spin columns with DNAse treatment. 2 纰実 of each sample was precipitated in ethanol and re-suspended in 14 纰宭 of water. Globin mitigation performed using Ambion's GLOBINclear kit (cat# AM1	Cy3	Custom automated version of the aminoallyl MessageAmp II kit from Ambion	9606	colon carcinoma_MS29	Homo sapiens	Stage: 2	overall survival (years): 2.46	overall survival censor (1-censored,0-non-censored): 0	metastasis (1-yes, 0-no): 1	time to metastasis (years): 2.36550308	time to recurrence (years): 2.37	age at diagnosis: 82	tumor location: ascend	duke's stage: B	total RNA	Total RNA was isolated from the adipose samples by Qiagen RNeasy spin columns with DNAse treatment. 2 纰実 of each sample was precipitated in ethanol and re-suspended in 14 纰宭 of water. Globin mitigation performed using Ambion's GLOBINclear kit (cat# AM1	Cy5	Custom automated version of the aminoallyl MessageAmp II kit from Ambion	9606	Microarrays are incubated at 40鎺矯 for 48 hours in a rotating carousel. Hybridizations to custom Agilent microarrays are completed as previously described (Hughes et al.Nat Biotech (2001), 19(4):342-7). Microarrays are washed to remove non-specific hybrid	Microarrays are scanned using the Agilent LP2 laser scanner. The scanner output is a Tiff file, which contains the quantitative hybridization data from each individual microarray. The Tiff files are then processed using Rosetta custom feature extraction s	human colorectal tumor RNA	Data were processed using the Rosetta Resolver搴?system. Rosetta's custom feature extraction software performs error modeling before data are loaded into the Resolver system. The Resolver system performs a squeeze operation that combines replicates of the	GPL13425	Michael,,Nebozhyn	GpGx/Computational System biology	Merck, Inc	Mail Stop WP53B-120, 770 Sumneytown Pike, Building 53, P.O. Box 4	West Point	PA	19486	USA	ftp://ftp.ncbi.nlm.nih.gov/geo/samples/GSM711nnn/GSM711538/suppl/GSM711538_16011454042775_1_1.txt.gz	ftp://ftp.ncbi.nlm.nih.gov/geo/samples/GSM711nnn/GSM711538/suppl/GSM711538_16011454042776_1_1.txt.gz	23698	82	B
GSM711539	colon carcinoma_MS34	GSM711539	Public on Apr 25 2011	Apr 19 2011	Apr 25 2011	RNA	2	pool of individual tumors	Homo sapiens	sample type: reference	total RNA	Total RNA was isolated from the adipose samples by Qiagen RNeasy spin columns with DNAse treatment. 2 纰実 of each sample was precipitated in ethanol and re-suspended in 14 纰宭 of water. Globin mitigation performed using Ambion's GLOBINclear kit (cat# AM1	Cy3	Custom automated version of the aminoallyl MessageAmp II kit from Ambion	9606	colon carcinoma_MS34	Homo sapiens	Stage: 2	overall survival (years): 12.03	overall survival censor (1-censored,0-non-censored): 1	metastasis (1-yes, 0-no): 0	time to metastasis (years): N/A	time to recurrence (years): 12.03	age at diagnosis: 62	tumor location: coecum	duke's stage: B	total RNA	Total RNA was isolated from the adipose samples by Qiagen RNeasy spin columns with DNAse treatment. 2 纰実 of each sample was precipitated in ethanol and re-suspended in 14 纰宭 of water. Globin mitigation performed using Ambion's GLOBINclear kit (cat# AM1	Cy5	Custom automated version of the aminoallyl MessageAmp II kit from Ambion	9606	Microarrays are incubated at 40鎺矯 for 48 hours in a rotating carousel. Hybridizations to custom Agilent microarrays are completed as previously described (Hughes et al.Nat Biotech (2001), 19(4):342-7). Microarrays are washed to remove non-specific hybrid	Microarrays are scanned using the Agilent LP2 laser scanner. The scanner output is a Tiff file, which contains the quantitative hybridization data from each individual microarray. The Tiff files are then processed using Rosetta custom feature extraction s	human colorectal tumor RNA	Data were processed using the Rosetta Resolver搴?system. Rosetta's custom feature extraction software performs error modeling before data are loaded into the Resolver system. The Resolver system performs a squeeze operation that combines replicates of the	GPL13425	Michael,,Nebozhyn	GpGx/Computational System biology	Merck, Inc	Mail Stop WP53B-120, 770 Sumneytown Pike, Building 53, P.O. Box 4	West Point	PA	19486	USA	ftp://ftp.ncbi.nlm.nih.gov/geo/samples/GSM711nnn/GSM711539/suppl/GSM711539_16011454043232_1_1.txt.gz	ftp://ftp.ncbi.nlm.nih.gov/geo/samples/GSM711nnn/GSM711539/suppl/GSM711539_16011454043233_1_1.txt.gz	23698	62	B
GSM711540	colon carcinoma_MS38	GSM711540	Public on Apr 25 2011	Apr 19 2011	Apr 25 2011	RNA	2	pool of individual tumors	Homo sapiens	sample type: reference	total RNA	Total RNA was isolated from the adipose samples by Qiagen RNeasy spin columns with DNAse treatment. 2 纰実 of each sample was precipitated in ethanol and re-suspended in 14 纰宭 of water. Globin mitigation performed using Ambion's GLOBINclear kit (cat# AM1	Cy3	Custom automated version of the aminoallyl MessageAmp II kit from Ambion	9606	colon carcinoma_MS38	Homo sapiens	Stage: 2	overall survival (years): 9.05	overall survival censor (1-censored,0-non-censored): 0	metastasis (1-yes, 0-no): 0	time to metastasis (years): N/A	time to recurrence (years): 9.05	age at diagnosis: 70	tumor location: rectosigm	duke's stage: B	total RNA	Total RNA was isolated from the adipose samples by Qiagen RNeasy spin columns with DNAse treatment. 2 纰実 of each sample was precipitated in ethanol and re-suspended in 14 纰宭 of water. Globin mitigation performed using Ambion's GLOBINclear kit (cat# AM1	Cy5	Custom automated version of the aminoallyl MessageAmp II kit from Ambion	9606	Microarrays are incubated at 40鎺矯 for 48 hours in a rotating carousel. Hybridizations to custom Agilent microarrays are completed as previously described (Hughes et al.Nat Biotech (2001), 19(4):342-7). Microarrays are washed to remove non-specific hybrid	Microarrays are scanned using the Agilent LP2 laser scanner. The scanner output is a Tiff file, which contains the quantitative hybridization data from each individual microarray. The Tiff files are then processed using Rosetta custom feature extraction s	human colorectal tumor RNA	Data were processed using the Rosetta Resolver搴?system. Rosetta's custom feature extraction software performs error modeling before data are loaded into the Resolver system. The Resolver system performs a squeeze operation that combines replicates of the	GPL13425	Michael,,Nebozhyn	GpGx/Computational System biology	Merck, Inc	Mail Stop WP53B-120, 770 Sumneytown Pike, Building 53, P.O. Box 4	West Point	PA	19486	USA	ftp://ftp.ncbi.nlm.nih.gov/geo/samples/GSM711nnn/GSM711540/suppl/GSM711540_16011454042773_1_1.txt.gz	ftp://ftp.ncbi.nlm.nih.gov/geo/samples/GSM711nnn/GSM711540/suppl/GSM711540_16011454042774_1_1.txt.gz	23698	70	B
GSM711541	colon carcinoma_MS47	GSM711541	Public on Apr 25 2011	Apr 19 2011	Apr 25 2011	RNA	2	pool of individual tumors	Homo sapiens	sample type: reference	total RNA	Total RNA was isolated from the adipose samples by Qiagen RNeasy spin columns with DNAse treatment. 2 纰実 of each sample was precipitated in ethanol and re-suspended in 14 纰宭 of water. Globin mitigation performed using Ambion's GLOBINclear kit (cat# AM1	Cy3	Custom automated version of the aminoallyl MessageAmp II kit from Ambion	9606	colon carcinoma_MS47	Homo sapiens	Stage: 2	overall survival (years): 8.31	overall survival censor (1-censored,0-non-censored): 1	metastasis (1-yes, 0-no): 0	time to metastasis (years): N/A	time to recurrence (years): 8.31	age at diagnosis: 61	tumor location: coecum	duke's stage: B	total RNA	Total RNA was isolated from the adipose samples by Qiagen RNeasy spin columns with DNAse treatment. 2 纰実 of each sample was precipitated in ethanol and re-suspended in 14 纰宭 of water. Globin mitigation performed using Ambion's GLOBINclear kit (cat# AM1	Cy5	Custom automated version of the aminoallyl MessageAmp II kit from Ambion	9606	Microarrays are incubated at 40鎺矯 for 48 hours in a rotating carousel. Hybridizations to custom Agilent microarrays are completed as previously described (Hughes et al.Nat Biotech (2001), 19(4):342-7). Microarrays are washed to remove non-specific hybrid	Microarrays are scanned using the Agilent LP2 laser scanner. The scanner output is a Tiff file, which contains the quantitative hybridization data from each individual microarray. The Tiff files are then processed using Rosetta custom feature extraction s	human colorectal tumor RNA	Data were processed using the Rosetta Resolver搴?system. Rosetta's custom feature extraction software performs error modeling before data are loaded into the Resolver system. The Resolver system performs a squeeze operation that combines replicates of the	GPL13425	Michael,,Nebozhyn	GpGx/Computational System biology	Merck, Inc	Mail Stop WP53B-120, 770 Sumneytown Pike, Building 53, P.O. Box 4	West Point	PA	19486	USA	ftp://ftp.ncbi.nlm.nih.gov/geo/samples/GSM711nnn/GSM711541/suppl/GSM711541_16011454042851_1_1.txt.gz	ftp://ftp.ncbi.nlm.nih.gov/geo/samples/GSM711nnn/GSM711541/suppl/GSM711541_16011454042852_1_1.txt.gz	23698	61	B
GSM711542	colon carcinoma_MS48	GSM711542	Public on Apr 25 2011	Apr 19 2011	Apr 25 2011	RNA	2	pool of individual tumors	Homo sapiens	sample type: reference	total RNA	Total RNA was isolated from the adipose samples by Qiagen RNeasy spin columns with DNAse treatment. 2 纰実 of each sample was precipitated in ethanol and re-suspended in 14 纰宭 of water. Globin mitigation performed using Ambion's GLOBINclear kit (cat# AM1	Cy3	Custom automated version of the aminoallyl MessageAmp II kit from Ambion	9606	colon carcinoma_MS48	Homo sapiens	Stage: 1	overall survival (years): 0.34	overall survival censor (1-censored,0-non-censored): 0	metastasis (1-yes, 0-no): 0	time to metastasis (years): N/A	time to recurrence (years): 0.34	age at diagnosis: 66	tumor location: coecum	duke's stage: B	total RNA	Total RNA was isolated from the adipose samples by Qiagen RNeasy spin columns with DNAse treatment. 2 纰実 of each sample was precipitated in ethanol and re-suspended in 14 纰宭 of water. Globin mitigation performed using Ambion's GLOBINclear kit (cat# AM1	Cy5	Custom automated version of the aminoallyl MessageAmp II kit from Ambion	9606	Microarrays are incubated at 40鎺矯 for 48 hours in a rotating carousel. Hybridizations to custom Agilent microarrays are completed as previously described (Hughes et al.Nat Biotech (2001), 19(4):342-7). Microarrays are washed to remove non-specific hybrid	Microarrays are scanned using the Agilent LP2 laser scanner. The scanner output is a Tiff file, which contains the quantitative hybridization data from each individual microarray. The Tiff files are then processed using Rosetta custom feature extraction s	human colorectal tumor RNA	Data were processed using the Rosetta Resolver搴?system. Rosetta's custom feature extraction software performs error modeling before data are loaded into the Resolver system. The Resolver system performs a squeeze operation that combines replicates of the	GPL13425	Michael,,Nebozhyn	GpGx/Computational System biology	Merck, Inc	Mail Stop WP53B-120, 770 Sumneytown Pike, Building 53, P.O. Box 4	West Point	PA	19486	USA	ftp://ftp.ncbi.nlm.nih.gov/geo/samples/GSM711nnn/GSM711542/suppl/GSM711542_16011454042849_1_1.txt.gz	ftp://ftp.ncbi.nlm.nih.gov/geo/samples/GSM711nnn/GSM711542/suppl/GSM711542_16011454042850_1_1.txt.gz	23698	66	B
GSM711543	colon carcinoma_MS51	GSM711543	Public on Apr 25 2011	Apr 19 2011	Apr 25 2011	RNA	2	pool of individual tumors	Homo sapiens	sample type: reference	total RNA	Total RNA was isolated from the adipose samples by Qiagen RNeasy spin columns with DNAse treatment. 2 纰実 of each sample was precipitated in ethanol and re-suspended in 14 纰宭 of water. Globin mitigation performed using Ambion's GLOBINclear kit (cat# AM1	Cy3	Custom automated version of the aminoallyl MessageAmp II kit from Ambion	9606	colon carcinoma_MS51	Homo sapiens	Stage: 2	overall survival (years): 7.20	overall survival censor (1-censored,0-non-censored): 0	metastasis (1-yes, 0-no): 0	time to metastasis (years): N/A	time to recurrence (years): 7.20	age at diagnosis: 76	tumor location: coecum	duke's stage: B	total RNA	Total RNA was isolated from the adipose samples by Qiagen RNeasy spin columns with DNAse treatment. 2 纰実 of each sample was precipitated in ethanol and re-suspended in 14 纰宭 of water. Globin mitigation performed using Ambion's GLOBINclear kit (cat# AM1	Cy5	Custom automated version of the aminoallyl MessageAmp II kit from Ambion	9606	Microarrays are incubated at 40鎺矯 for 48 hours in a rotating carousel. Hybridizations to custom Agilent microarrays are completed as previously described (Hughes et al.Nat Biotech (2001), 19(4):342-7). Microarrays are washed to remove non-specific hybrid	Microarrays are scanned using the Agilent LP2 laser scanner. The scanner output is a Tiff file, which contains the quantitative hybridization data from each individual microarray. The Tiff files are then processed using Rosetta custom feature extraction s	human colorectal tumor RNA	Data were processed using the Rosetta Resolver搴?system. Rosetta's custom feature extraction software performs error modeling before data are loaded into the Resolver system. The Resolver system performs a squeeze operation that combines replicates of the	GPL13425	Michael,,Nebozhyn	GpGx/Computational System biology	Merck, Inc	Mail Stop WP53B-120, 770 Sumneytown Pike, Building 53, P.O. Box 4	West Point	PA	19486	USA	ftp://ftp.ncbi.nlm.nih.gov/geo/samples/GSM711nnn/GSM711543/suppl/GSM711543_16011454043230_1_1.txt.gz	ftp://ftp.ncbi.nlm.nih.gov/geo/samples/GSM711nnn/GSM711543/suppl/GSM711543_16011454043231_1_1.txt.gz	23698	76	B
GSM711544	colon carcinoma_MS52	GSM711544	Public on Apr 25 2011	Apr 19 2011	Apr 25 2011	RNA	2	pool of individual tumors	Homo sapiens	sample type: reference	total RNA	Total RNA was isolated from the adipose samples by Qiagen RNeasy spin columns with DNAse treatment. 2 纰実 of each sample was precipitated in ethanol and re-suspended in 14 纰宭 of water. Globin mitigation performed using Ambion's GLOBINclear kit (cat# AM1	Cy3	Custom automated version of the aminoallyl MessageAmp II kit from Ambion	9606	colon carcinoma_MS52	Homo sapiens	Stage: 2	overall survival (years): 7.87	overall survival censor (1-censored,0-non-censored): 0	metastasis (1-yes, 0-no): 0	time to metastasis (years): N/A	time to recurrence (years): 7.87	age at diagnosis: 72	tumor location: ascend	duke's stage: B	total RNA	Total RNA was isolated from the adipose samples by Qiagen RNeasy spin columns with DNAse treatment. 2 纰実 of each sample was precipitated in ethanol and re-suspended in 14 纰宭 of water. Globin mitigation performed using Ambion's GLOBINclear kit (cat# AM1	Cy5	Custom automated version of the aminoallyl MessageAmp II kit from Ambion	9606	Microarrays are incubated at 40鎺矯 for 48 hours in a rotating carousel. Hybridizations to custom Agilent microarrays are completed as previously described (Hughes et al.Nat Biotech (2001), 19(4):342-7). Microarrays are washed to remove non-specific hybrid	Microarrays are scanned using the Agilent LP2 laser scanner. The scanner output is a Tiff file, which contains the quantitative hybridization data from each individual microarray. The Tiff files are then processed using Rosetta custom feature extraction s	human colorectal tumor RNA	Data were processed using the Rosetta Resolver搴?system. Rosetta's custom feature extraction software performs error modeling before data are loaded into the Resolver system. The Resolver system performs a squeeze operation that combines replicates of the	GPL13425	Michael,,Nebozhyn	GpGx/Computational System biology	Merck, Inc	Mail Stop WP53B-120, 770 Sumneytown Pike, Building 53, P.O. Box 4	West Point	PA	19486	USA	ftp://ftp.ncbi.nlm.nih.gov/geo/samples/GSM711nnn/GSM711544/suppl/GSM711544_16011454043464_1_1.txt.gz	ftp://ftp.ncbi.nlm.nih.gov/geo/samples/GSM711nnn/GSM711544/suppl/GSM711544_16011454043467_1_1.txt.gz	23698	72	B
GSM711545	colon carcinoma_MS57	GSM711545	Public on Apr 25 2011	Apr 19 2011	Apr 25 2011	RNA	2	pool of individual tumors	Homo sapiens	sample type: reference	total RNA	Total RNA was isolated from the adipose samples by Qiagen RNeasy spin columns with DNAse treatment. 2 纰実 of each sample was precipitated in ethanol and re-suspended in 14 纰宭 of water. Globin mitigation performed using Ambion's GLOBINclear kit (cat# AM1	Cy3	Custom automated version of the aminoallyl MessageAmp II kit from Ambion	9606	colon carcinoma_MS57	Homo sapiens	Stage: 3	overall survival (years): 6.92	overall survival censor (1-censored,0-non-censored): 0	metastasis (1-yes, 0-no): 0	time to metastasis (years): N/A	time to recurrence (years): 6.92	age at diagnosis: 68	tumor location: coecum	duke's stage: C	total RNA	Total RNA was isolated from the adipose samples by Qiagen RNeasy spin columns with DNAse treatment. 2 纰実 of each sample was precipitated in ethanol and re-suspended in 14 纰宭 of water. Globin mitigation performed using Ambion's GLOBINclear kit (cat# AM1	Cy5	Custom automated version of the aminoallyl MessageAmp II kit from Ambion	9606	Microarrays are incubated at 40鎺矯 for 48 hours in a rotating carousel. Hybridizations to custom Agilent microarrays are completed as previously described (Hughes et al.Nat Biotech (2001), 19(4):342-7). Microarrays are washed to remove non-specific hybrid	Microarrays are scanned using the Agilent LP2 laser scanner. The scanner output is a Tiff file, which contains the quantitative hybridization data from each individual microarray. The Tiff files are then processed using Rosetta custom feature extraction s	human colorectal tumor RNA	Data were processed using the Rosetta Resolver搴?system. Rosetta's custom feature extraction software performs error modeling before data are loaded into the Resolver system. The Resolver system performs a squeeze operation that combines replicates of the	GPL13425	Michael,,Nebozhyn	GpGx/Computational System biology	Merck, Inc	Mail Stop WP53B-120, 770 Sumneytown Pike, Building 53, P.O. Box 4	West Point	PA	19486	USA	ftp://ftp.ncbi.nlm.nih.gov/geo/samples/GSM711nnn/GSM711545/suppl/GSM711545_16011454042847_1_1.txt.gz	ftp://ftp.ncbi.nlm.nih.gov/geo/samples/GSM711nnn/GSM711545/suppl/GSM711545_16011454042848_1_1.txt.gz	23698	68	C
GSM711546	colon carcinoma_MS69	GSM711546	Public on Apr 25 2011	Apr 19 2011	Apr 25 2011	RNA	2	pool of individual tumors	Homo sapiens	sample type: reference	total RNA	Total RNA was isolated from the adipose samples by Qiagen RNeasy spin columns with DNAse treatment. 2 纰実 of each sample was precipitated in ethanol and re-suspended in 14 纰宭 of water. Globin mitigation performed using Ambion's GLOBINclear kit (cat# AM1	Cy3	Custom automated version of the aminoallyl MessageAmp II kit from Ambion	9606	colon carcinoma_MS69	Homo sapiens	Stage: 2	overall survival (years): 12.62	overall survival censor (1-censored,0-non-censored): 1	metastasis (1-yes, 0-no): 0	time to metastasis (years): N/A	time to recurrence (years): 12.62	age at diagnosis: 62	tumor location: ascend	duke's stage: B	total RNA	Total RNA was isolated from the adipose samples by Qiagen RNeasy spin columns with DNAse treatment. 2 纰実 of each sample was precipitated in ethanol and re-suspended in 14 纰宭 of water. Globin mitigation performed using Ambion's GLOBINclear kit (cat# AM1	Cy5	Custom automated version of the aminoallyl MessageAmp II kit from Ambion	9606	Microarrays are incubated at 40鎺矯 for 48 hours in a rotating carousel. Hybridizations to custom Agilent microarrays are completed as previously described (Hughes et al.Nat Biotech (2001), 19(4):342-7). Microarrays are washed to remove non-specific hybrid	Microarrays are scanned using the Agilent LP2 laser scanner. The scanner output is a Tiff file, which contains the quantitative hybridization data from each individual microarray. The Tiff files are then processed using Rosetta custom feature extraction s	human colorectal tumor RNA	Data were processed using the Rosetta Resolver搴?system. Rosetta's custom feature extraction software performs error modeling before data are loaded into the Resolver system. The Resolver system performs a squeeze operation that combines replicates of the	GPL13425	Michael,,Nebozhyn	GpGx/Computational System biology	Merck, Inc	Mail Stop WP53B-120, 770 Sumneytown Pike, Building 53, P.O. Box 4	West Point	PA	19486	USA	ftp://ftp.ncbi.nlm.nih.gov/geo/samples/GSM711nnn/GSM711546/suppl/GSM711546_16011454043466_1_1.txt.gz	ftp://ftp.ncbi.nlm.nih.gov/geo/samples/GSM711nnn/GSM711546/suppl/GSM711546_16011454043468_1_1.txt.gz	23698	62	B
GSM711547	colon carcinoma_MS78	GSM711547	Public on Apr 25 2011	Apr 19 2011	Apr 25 2011	RNA	2	pool of individual tumors	Homo sapiens	sample type: reference	total RNA	Total RNA was isolated from the adipose samples by Qiagen RNeasy spin columns with DNAse treatment. 2 纰実 of each sample was precipitated in ethanol and re-suspended in 14 纰宭 of water. Globin mitigation performed using Ambion's GLOBINclear kit (cat# AM1	Cy3	Custom automated version of the aminoallyl MessageAmp II kit from Ambion	9606	colon carcinoma_MS78	Homo sapiens	Stage: 2	overall survival (years): 4.19	overall survival censor (1-censored,0-non-censored): 0	metastasis (1-yes, 0-no): 1	time to metastasis (years): 4.128678987	time to recurrence (years): 4.13	age at diagnosis: 70	tumor location: transvers	duke's stage: B	total RNA	Total RNA was isolated from the adipose samples by Qiagen RNeasy spin columns with DNAse treatment. 2 纰実 of each sample was precipitated in ethanol and re-suspended in 14 纰宭 of water. Globin mitigation performed using Ambion's GLOBINclear kit (cat# AM1	Cy5	Custom automated version of the aminoallyl MessageAmp II kit from Ambion	9606	Microarrays are incubated at 40鎺矯 for 48 hours in a rotating carousel. Hybridizations to custom Agilent microarrays are completed as previously described (Hughes et al.Nat Biotech (2001), 19(4):342-7). Microarrays are washed to remove non-specific hybrid	Microarrays are scanned using the Agilent LP2 laser scanner. The scanner output is a Tiff file, which contains the quantitative hybridization data from each individual microarray. The Tiff files are then processed using Rosetta custom feature extraction s	human colorectal tumor RNA	Data were processed using the Rosetta Resolver搴?system. Rosetta's custom feature extraction software performs error modeling before data are loaded into the Resolver system. The Resolver system performs a squeeze operation that combines replicates of the	GPL13425	Michael,,Nebozhyn	GpGx/Computational System biology	Merck, Inc	Mail Stop WP53B-120, 770 Sumneytown Pike, Building 53, P.O. Box 4	West Point	PA	19486	USA	ftp://ftp.ncbi.nlm.nih.gov/geo/samples/GSM711nnn/GSM711547/suppl/GSM711547_16011454042843_1_1.txt.gz	ftp://ftp.ncbi.nlm.nih.gov/geo/samples/GSM711nnn/GSM711547/suppl/GSM711547_16011454042846_1_1.txt.gz	23698	70	B
GSM711548	colon carcinoma_MS79	GSM711548	Public on Apr 25 2011	Apr 19 2011	Apr 25 2011	RNA	2	pool of individual tumors	Homo sapiens	sample type: reference	total RNA	Total RNA was isolated from the adipose samples by Qiagen RNeasy spin columns with DNAse treatment. 2 纰実 of each sample was precipitated in ethanol and re-suspended in 14 纰宭 of water. Globin mitigation performed using Ambion's GLOBINclear kit (cat# AM1	Cy3	Custom automated version of the aminoallyl MessageAmp II kit from Ambion	9606	colon carcinoma_MS79	Homo sapiens	Stage: 3	overall survival (years): 1.51	overall survival censor (1-censored,0-non-censored): 0	metastasis (1-yes, 0-no): 1	time to metastasis (years): 1.207392197	time to recurrence (years): 1.20	age at diagnosis: 71	tumor location: sigmoid	duke's stage: C	total RNA	Total RNA was isolated from the adipose samples by Qiagen RNeasy spin columns with DNAse treatment. 2 纰実 of each sample was precipitated in ethanol and re-suspended in 14 纰宭 of water. Globin mitigation performed using Ambion's GLOBINclear kit (cat# AM1	Cy5	Custom automated version of the aminoallyl MessageAmp II kit from Ambion	9606	Microarrays are incubated at 40鎺矯 for 48 hours in a rotating carousel. Hybridizations to custom Agilent microarrays are completed as previously described (Hughes et al.Nat Biotech (2001), 19(4):342-7). Microarrays are washed to remove non-specific hybrid	Microarrays are scanned using the Agilent LP2 laser scanner. The scanner output is a Tiff file, which contains the quantitative hybridization data from each individual microarray. The Tiff files are then processed using Rosetta custom feature extraction s	human colorectal tumor RNA	Data were processed using the Rosetta Resolver搴?system. Rosetta's custom feature extraction software performs error modeling before data are loaded into the Resolver system. The Resolver system performs a squeeze operation that combines replicates of the	GPL13425	Michael,,Nebozhyn	GpGx/Computational System biology	Merck, Inc	Mail Stop WP53B-120, 770 Sumneytown Pike, Building 53, P.O. Box 4	West Point	PA	19486	USA	ftp://ftp.ncbi.nlm.nih.gov/geo/samples/GSM711nnn/GSM711548/suppl/GSM711548_16011454042821_1_1.txt.gz	ftp://ftp.ncbi.nlm.nih.gov/geo/samples/GSM711nnn/GSM711548/suppl/GSM711548_16011454042822_1_1.txt.gz	23698	71	C
GSM711549	colon carcinoma_MS80	GSM711549	Public on Apr 25 2011	Apr 19 2011	Apr 25 2011	RNA	2	pool of individual tumors	Homo sapiens	sample type: reference	total RNA	Total RNA was isolated from the adipose samples by Qiagen RNeasy spin columns with DNAse treatment. 2 纰実 of each sample was precipitated in ethanol and re-suspended in 14 纰宭 of water. Globin mitigation performed using Ambion's GLOBINclear kit (cat# AM1	Cy3	Custom automated version of the aminoallyl MessageAmp II kit from Ambion	9606	colon carcinoma_MS80	Homo sapiens	Stage: 3	overall survival (years): 1.03	overall survival censor (1-censored,0-non-censored): 0	metastasis (1-yes, 0-no): 1	time to metastasis (years): 0.865160849	time to recurrence (years): 0.87	age at diagnosis: 71	tumor location: coecum	duke's stage: C	total RNA	Total RNA was isolated from the adipose samples by Qiagen RNeasy spin columns with DNAse treatment. 2 纰実 of each sample was precipitated in ethanol and re-suspended in 14 纰宭 of water. Globin mitigation performed using Ambion's GLOBINclear kit (cat# AM1	Cy5	Custom automated version of the aminoallyl MessageAmp II kit from Ambion	9606	Microarrays are incubated at 40鎺矯 for 48 hours in a rotating carousel. Hybridizations to custom Agilent microarrays are completed as previously described (Hughes et al.Nat Biotech (2001), 19(4):342-7). Microarrays are washed to remove non-specific hybrid	Microarrays are scanned using the Agilent LP2 laser scanner. The scanner output is a Tiff file, which contains the quantitative hybridization data from each individual microarray. The Tiff files are then processed using Rosetta custom feature extraction s	human colorectal tumor RNA	Data were processed using the Rosetta Resolver搴?system. Rosetta's custom feature extraction software performs error modeling before data are loaded into the Resolver system. The Resolver system performs a squeeze operation that combines replicates of the	GPL13425	Michael,,Nebozhyn	GpGx/Computational System biology	Merck, Inc	Mail Stop WP53B-120, 770 Sumneytown Pike, Building 53, P.O. Box 4	West Point	PA	19486	USA	ftp://ftp.ncbi.nlm.nih.gov/geo/samples/GSM711nnn/GSM711549/suppl/GSM711549_16011454042819_1_1.txt.gz	ftp://ftp.ncbi.nlm.nih.gov/geo/samples/GSM711nnn/GSM711549/suppl/GSM711549_16011454042820_1_1.txt.gz	23698	71	C
GSM711550	colon carcinoma_MS82	GSM711550	Public on Apr 25 2011	Apr 19 2011	Apr 25 2011	RNA	2	pool of individual tumors	Homo sapiens	sample type: reference	total RNA	Total RNA was isolated from the adipose samples by Qiagen RNeasy spin columns with DNAse treatment. 2 纰実 of each sample was precipitated in ethanol and re-suspended in 14 纰宭 of water. Globin mitigation performed using Ambion's GLOBINclear kit (cat# AM1	Cy3	Custom automated version of the aminoallyl MessageAmp II kit from Ambion	9606	colon carcinoma_MS82	Homo sapiens	Stage: 2	overall survival (years): 4.24	overall survival censor (1-censored,0-non-censored): 0	metastasis (1-yes, 0-no): 1	time to metastasis (years): 3.934291581	time to recurrence (years): 3.93	age at diagnosis: 74	tumor location: sigmoid	duke's stage: C	total RNA	Total RNA was isolated from the adipose samples by Qiagen RNeasy spin columns with DNAse treatment. 2 纰実 of each sample was precipitated in ethanol and re-suspended in 14 纰宭 of water. Globin mitigation performed using Ambion's GLOBINclear kit (cat# AM1	Cy5	Custom automated version of the aminoallyl MessageAmp II kit from Ambion	9606	Microarrays are incubated at 40鎺矯 for 48 hours in a rotating carousel. Hybridizations to custom Agilent microarrays are completed as previously described (Hughes et al.Nat Biotech (2001), 19(4):342-7). Microarrays are washed to remove non-specific hybrid	Microarrays are scanned using the Agilent LP2 laser scanner. The scanner output is a Tiff file, which contains the quantitative hybridization data from each individual microarray. The Tiff files are then processed using Rosetta custom feature extraction s	human colorectal tumor RNA	Data were processed using the Rosetta Resolver搴?system. Rosetta's custom feature extraction software performs error modeling before data are loaded into the Resolver system. The Resolver system performs a squeeze operation that combines replicates of the	GPL13425	Michael,,Nebozhyn	GpGx/Computational System biology	Merck, Inc	Mail Stop WP53B-120, 770 Sumneytown Pike, Building 53, P.O. Box 4	West Point	PA	19486	USA	ftp://ftp.ncbi.nlm.nih.gov/geo/samples/GSM711nnn/GSM711550/suppl/GSM711550_16011454043244_1_1.txt.gz	ftp://ftp.ncbi.nlm.nih.gov/geo/samples/GSM711nnn/GSM711550/suppl/GSM711550_16011454043245_1_1.txt.gz	23698	74	C
GSM711551	colon carcinoma_MS86	GSM711551	Public on Apr 25 2011	Apr 19 2011	Apr 25 2011	RNA	2	pool of individual tumors	Homo sapiens	sample type: reference	total RNA	Total RNA was isolated from the adipose samples by Qiagen RNeasy spin columns with DNAse treatment. 2 纰実 of each sample was precipitated in ethanol and re-suspended in 14 纰宭 of water. Globin mitigation performed using Ambion's GLOBINclear kit (cat# AM1	Cy3	Custom automated version of the aminoallyl MessageAmp II kit from Ambion	9606	colon carcinoma_MS86	Homo sapiens	Stage: N/A	overall survival (years): 1.00	overall survival censor (1-censored,0-non-censored): 0	metastasis (1-yes, 0-no): 1	time to metastasis (years): 0.829568789	time to recurrence (years): 0.83	age at diagnosis: 68	tumor location: coecum	duke's stage: C	total RNA	Total RNA was isolated from the adipose samples by Qiagen RNeasy spin columns with DNAse treatment. 2 纰実 of each sample was precipitated in ethanol and re-suspended in 14 纰宭 of water. Globin mitigation performed using Ambion's GLOBINclear kit (cat# AM1	Cy5	Custom automated version of the aminoallyl MessageAmp II kit from Ambion	9606	Microarrays are incubated at 40鎺矯 for 48 hours in a rotating carousel. Hybridizations to custom Agilent microarrays are completed as previously described (Hughes et al.Nat Biotech (2001), 19(4):342-7). Microarrays are washed to remove non-specific hybrid	Microarrays are scanned using the Agilent LP2 laser scanner. The scanner output is a Tiff file, which contains the quantitative hybridization data from each individual microarray. The Tiff files are then processed using Rosetta custom feature extraction s	human colorectal tumor RNA	Data were processed using the Rosetta Resolver搴?system. Rosetta's custom feature extraction software performs error modeling before data are loaded into the Resolver system. The Resolver system performs a squeeze operation that combines replicates of the	GPL13425	Michael,,Nebozhyn	GpGx/Computational System biology	Merck, Inc	Mail Stop WP53B-120, 770 Sumneytown Pike, Building 53, P.O. Box 4	West Point	PA	19486	USA	ftp://ftp.ncbi.nlm.nih.gov/geo/samples/GSM711nnn/GSM711551/suppl/GSM711551_16011454042817_1_1.txt.gz	ftp://ftp.ncbi.nlm.nih.gov/geo/samples/GSM711nnn/GSM711551/suppl/GSM711551_16011454042818_1_1.txt.gz	23698	68	C
GSM711552	colon carcinoma_MS87	GSM711552	Public on Apr 25 2011	Apr 19 2011	Apr 25 2011	RNA	2	pool of individual tumors	Homo sapiens	sample type: reference	total RNA	Total RNA was isolated from the adipose samples by Qiagen RNeasy spin columns with DNAse treatment. 2 纰実 of each sample was precipitated in ethanol and re-suspended in 14 纰宭 of water. Globin mitigation performed using Ambion's GLOBINclear kit (cat# AM1	Cy3	Custom automated version of the aminoallyl MessageAmp II kit from Ambion	9606	colon carcinoma_MS87	Homo sapiens	Stage: 3	overall survival (years): 3.76	overall survival censor (1-censored,0-non-censored): 0	metastasis (1-yes, 0-no): 1	time to metastasis (years): 0.158795346	time to recurrence (years): 0.16	age at diagnosis: 21	tumor location: transvers	duke's stage: D	total RNA	Total RNA was isolated from the adipose samples by Qiagen RNeasy spin columns with DNAse treatment. 2 纰実 of each sample was precipitated in ethanol and re-suspended in 14 纰宭 of water. Globin mitigation performed using Ambion's GLOBINclear kit (cat# AM1	Cy5	Custom automated version of the aminoallyl MessageAmp II kit from Ambion	9606	Microarrays are incubated at 40鎺矯 for 48 hours in a rotating carousel. Hybridizations to custom Agilent microarrays are completed as previously described (Hughes et al.Nat Biotech (2001), 19(4):342-7). Microarrays are washed to remove non-specific hybrid	Microarrays are scanned using the Agilent LP2 laser scanner. The scanner output is a Tiff file, which contains the quantitative hybridization data from each individual microarray. The Tiff files are then processed using Rosetta custom feature extraction s	human colorectal tumor RNA	Data were processed using the Rosetta Resolver搴?system. Rosetta's custom feature extraction software performs error modeling before data are loaded into the Resolver system. The Resolver system performs a squeeze operation that combines replicates of the	GPL13425	Michael,,Nebozhyn	GpGx/Computational System biology	Merck, Inc	Mail Stop WP53B-120, 770 Sumneytown Pike, Building 53, P.O. Box 4	West Point	PA	19486	USA	ftp://ftp.ncbi.nlm.nih.gov/geo/samples/GSM711nnn/GSM711552/suppl/GSM711552_16011454042815_1_1.txt.gz	ftp://ftp.ncbi.nlm.nih.gov/geo/samples/GSM711nnn/GSM711552/suppl/GSM711552_16011454042816_1_1.txt.gz	23698	21	D
GSM711553	colon carcinoma_MS88	GSM711553	Public on Apr 25 2011	Apr 19 2011	Apr 25 2011	RNA	2	pool of individual tumors	Homo sapiens	sample type: reference	total RNA	Total RNA was isolated from the adipose samples by Qiagen RNeasy spin columns with DNAse treatment. 2 纰実 of each sample was precipitated in ethanol and re-suspended in 14 纰宭 of water. Globin mitigation performed using Ambion's GLOBINclear kit (cat# AM1	Cy3	Custom automated version of the aminoallyl MessageAmp II kit from Ambion	9606	colon carcinoma_MS88	Homo sapiens	Stage: 3	overall survival (years): 3.53	overall survival censor (1-censored,0-non-censored): 0	metastasis (1-yes, 0-no): 1	time to metastasis (years): 1.579739904	time to recurrence (years): 1.58	age at diagnosis: 65	tumor location: transvers	duke's stage: C	total RNA	Total RNA was isolated from the adipose samples by Qiagen RNeasy spin columns with DNAse treatment. 2 纰実 of each sample was precipitated in ethanol and re-suspended in 14 纰宭 of water. Globin mitigation performed using Ambion's GLOBINclear kit (cat# AM1	Cy5	Custom automated version of the aminoallyl MessageAmp II kit from Ambion	9606	Microarrays are incubated at 40鎺矯 for 48 hours in a rotating carousel. Hybridizations to custom Agilent microarrays are completed as previously described (Hughes et al.Nat Biotech (2001), 19(4):342-7). Microarrays are washed to remove non-specific hybrid	Microarrays are scanned using the Agilent LP2 laser scanner. The scanner output is a Tiff file, which contains the quantitative hybridization data from each individual microarray. The Tiff files are then processed using Rosetta custom feature extraction s	human colorectal tumor RNA	Data were processed using the Rosetta Resolver搴?system. Rosetta's custom feature extraction software performs error modeling before data are loaded into the Resolver system. The Resolver system performs a squeeze operation that combines replicates of the	GPL13425	Michael,,Nebozhyn	GpGx/Computational System biology	Merck, Inc	Mail Stop WP53B-120, 770 Sumneytown Pike, Building 53, P.O. Box 4	West Point	PA	19486	USA	ftp://ftp.ncbi.nlm.nih.gov/geo/samples/GSM711nnn/GSM711553/suppl/GSM711553_16011454042813_1_1.txt.gz	ftp://ftp.ncbi.nlm.nih.gov/geo/samples/GSM711nnn/GSM711553/suppl/GSM711553_16011454042814_1_1.txt.gz	23698	65	C
GSM711554	colon carcinoma_MS89	GSM711554	Public on Apr 25 2011	Apr 19 2011	Apr 25 2011	RNA	2	pool of individual tumors	Homo sapiens	sample type: reference	total RNA	Total RNA was isolated from the adipose samples by Qiagen RNeasy spin columns with DNAse treatment. 2 纰実 of each sample was precipitated in ethanol and re-suspended in 14 纰宭 of water. Globin mitigation performed using Ambion's GLOBINclear kit (cat# AM1	Cy3	Custom automated version of the aminoallyl MessageAmp II kit from Ambion	9606	colon carcinoma_MS89	Homo sapiens	Stage: 3	overall survival (years): 1.53	overall survival censor (1-censored,0-non-censored): 0	metastasis (1-yes, 0-no): 1	time to metastasis (years): 0.709103354	time to recurrence (years): 0.71	age at diagnosis: 73	tumor location: sigmoid	duke's stage: C	total RNA	Total RNA was isolated from the adipose samples by Qiagen RNeasy spin columns with DNAse treatment. 2 纰実 of each sample was precipitated in ethanol and re-suspended in 14 纰宭 of water. Globin mitigation performed using Ambion's GLOBINclear kit (cat# AM1	Cy5	Custom automated version of the aminoallyl MessageAmp II kit from Ambion	9606	Microarrays are incubated at 40鎺矯 for 48 hours in a rotating carousel. Hybridizations to custom Agilent microarrays are completed as previously described (Hughes et al.Nat Biotech (2001), 19(4):342-7). Microarrays are washed to remove non-specific hybrid	Microarrays are scanned using the Agilent LP2 laser scanner. The scanner output is a Tiff file, which contains the quantitative hybridization data from each individual microarray. The Tiff files are then processed using Rosetta custom feature extraction s	human colorectal tumor RNA	Data were processed using the Rosetta Resolver搴?system. Rosetta's custom feature extraction software performs error modeling before data are loaded into the Resolver system. The Resolver system performs a squeeze operation that combines replicates of the	GPL13425	Michael,,Nebozhyn	GpGx/Computational System biology	Merck, Inc	Mail Stop WP53B-120, 770 Sumneytown Pike, Building 53, P.O. Box 4	West Point	PA	19486	USA	ftp://ftp.ncbi.nlm.nih.gov/geo/samples/GSM711nnn/GSM711554/suppl/GSM711554_16011454042811_1_1.txt.gz	ftp://ftp.ncbi.nlm.nih.gov/geo/samples/GSM711nnn/GSM711554/suppl/GSM711554_16011454042812_1_1.txt.gz	23698	73	C
GSM711555	colon carcinoma_MS90	GSM711555	Public on Apr 25 2011	Apr 19 2011	Apr 25 2011	RNA	2	pool of individual tumors	Homo sapiens	sample type: reference	total RNA	Total RNA was isolated from the adipose samples by Qiagen RNeasy spin columns with DNAse treatment. 2 纰実 of each sample was precipitated in ethanol and re-suspended in 14 纰宭 of water. Globin mitigation performed using Ambion's GLOBINclear kit (cat# AM1	Cy3	Custom automated version of the aminoallyl MessageAmp II kit from Ambion	9606	colon carcinoma_MS90	Homo sapiens	Stage: 3	overall survival (years): 3.16	overall survival censor (1-censored,0-non-censored): 0	metastasis (1-yes, 0-no): 1	time to metastasis (years): 0.930869268	time to recurrence (years): 0.93	age at diagnosis: 79	tumor location: transvers	duke's stage: C	total RNA	Total RNA was isolated from the adipose samples by Qiagen RNeasy spin columns with DNAse treatment. 2 纰実 of each sample was precipitated in ethanol and re-suspended in 14 纰宭 of water. Globin mitigation performed using Ambion's GLOBINclear kit (cat# AM1	Cy5	Custom automated version of the aminoallyl MessageAmp II kit from Ambion	9606	Microarrays are incubated at 40鎺矯 for 48 hours in a rotating carousel. Hybridizations to custom Agilent microarrays are completed as previously described (Hughes et al.Nat Biotech (2001), 19(4):342-7). Microarrays are washed to remove non-specific hybrid	Microarrays are scanned using the Agilent LP2 laser scanner. The scanner output is a Tiff file, which contains the quantitative hybridization data from each individual microarray. The Tiff files are then processed using Rosetta custom feature extraction s	human colorectal tumor RNA	Data were processed using the Rosetta Resolver搴?system. Rosetta's custom feature extraction software performs error modeling before data are loaded into the Resolver system. The Resolver system performs a squeeze operation that combines replicates of the	GPL13425	Michael,,Nebozhyn	GpGx/Computational System biology	Merck, Inc	Mail Stop WP53B-120, 770 Sumneytown Pike, Building 53, P.O. Box 4	West Point	PA	19486	USA	ftp://ftp.ncbi.nlm.nih.gov/geo/samples/GSM711nnn/GSM711555/suppl/GSM711555_16011454042809_1_1.txt.gz	ftp://ftp.ncbi.nlm.nih.gov/geo/samples/GSM711nnn/GSM711555/suppl/GSM711555_16011454042810_1_1.txt.gz	23698	79	C
GSM711556	colon carcinoma_MS93	GSM711556	Public on Apr 25 2011	Apr 19 2011	Apr 25 2011	RNA	2	pool of individual tumors	Homo sapiens	sample type: reference	total RNA	Total RNA was isolated from the adipose samples by Qiagen RNeasy spin columns with DNAse treatment. 2 纰実 of each sample was precipitated in ethanol and re-suspended in 14 纰宭 of water. Globin mitigation performed using Ambion's GLOBINclear kit (cat# AM1	Cy3	Custom automated version of the aminoallyl MessageAmp II kit from Ambion	9606	colon carcinoma_MS93	Homo sapiens	Stage: 2	overall survival (years): 10.16	overall survival censor (1-censored,0-non-censored): 0	metastasis (1-yes, 0-no): 0	time to metastasis (years): N/A	time to recurrence (years): 10.16	age at diagnosis: 84	tumor location: ascend	duke's stage: B	total RNA	Total RNA was isolated from the adipose samples by Qiagen RNeasy spin columns with DNAse treatment. 2 纰実 of each sample was precipitated in ethanol and re-suspended in 14 纰宭 of water. Globin mitigation performed using Ambion's GLOBINclear kit (cat# AM1	Cy5	Custom automated version of the aminoallyl MessageAmp II kit from Ambion	9606	Microarrays are incubated at 40鎺矯 for 48 hours in a rotating carousel. Hybridizations to custom Agilent microarrays are completed as previously described (Hughes et al.Nat Biotech (2001), 19(4):342-7). Microarrays are washed to remove non-specific hybrid	Microarrays are scanned using the Agilent LP2 laser scanner. The scanner output is a Tiff file, which contains the quantitative hybridization data from each individual microarray. The Tiff files are then processed using Rosetta custom feature extraction s	human colorectal tumor RNA	Data were processed using the Rosetta Resolver搴?system. Rosetta's custom feature extraction software performs error modeling before data are loaded into the Resolver system. The Resolver system performs a squeeze operation that combines replicates of the	GPL13425	Michael,,Nebozhyn	GpGx/Computational System biology	Merck, Inc	Mail Stop WP53B-120, 770 Sumneytown Pike, Building 53, P.O. Box 4	West Point	PA	19486	USA	ftp://ftp.ncbi.nlm.nih.gov/geo/samples/GSM711nnn/GSM711556/suppl/GSM711556_16011454042805_1_1.txt.gz	ftp://ftp.ncbi.nlm.nih.gov/geo/samples/GSM711nnn/GSM711556/suppl/GSM711556_16011454042806_1_1.txt.gz	23698	84	B
GSM711557	colon carcinoma_MS94	GSM711557	Public on Apr 25 2011	Apr 19 2011	Apr 25 2011	RNA	2	pool of individual tumors	Homo sapiens	sample type: reference	total RNA	Total RNA was isolated from the adipose samples by Qiagen RNeasy spin columns with DNAse treatment. 2 纰実 of each sample was precipitated in ethanol and re-suspended in 14 纰宭 of water. Globin mitigation performed using Ambion's GLOBINclear kit (cat# AM1	Cy3	Custom automated version of the aminoallyl MessageAmp II kit from Ambion	9606	colon carcinoma_MS94	Homo sapiens	Stage: 3	overall survival (years): 0.96	overall survival censor (1-censored,0-non-censored): 0	metastasis (1-yes, 0-no): 0	time to metastasis (years): N/A	time to recurrence (years): 0.96	age at diagnosis: 64	tumor location: rectum	duke's stage: C	total RNA	Total RNA was isolated from the adipose samples by Qiagen RNeasy spin columns with DNAse treatment. 2 纰実 of each sample was precipitated in ethanol and re-suspended in 14 纰宭 of water. Globin mitigation performed using Ambion's GLOBINclear kit (cat# AM1	Cy5	Custom automated version of the aminoallyl MessageAmp II kit from Ambion	9606	Microarrays are incubated at 40鎺矯 for 48 hours in a rotating carousel. Hybridizations to custom Agilent microarrays are completed as previously described (Hughes et al.Nat Biotech (2001), 19(4):342-7). Microarrays are washed to remove non-specific hybrid	Microarrays are scanned using the Agilent LP2 laser scanner. The scanner output is a Tiff file, which contains the quantitative hybridization data from each individual microarray. The Tiff files are then processed using Rosetta custom feature extraction s	human colorectal tumor RNA	Data were processed using the Rosetta Resolver搴?system. Rosetta's custom feature extraction software performs error modeling before data are loaded into the Resolver system. The Resolver system performs a squeeze operation that combines replicates of the	GPL13425	Michael,,Nebozhyn	GpGx/Computational System biology	Merck, Inc	Mail Stop WP53B-120, 770 Sumneytown Pike, Building 53, P.O. Box 4	West Point	PA	19486	USA	ftp://ftp.ncbi.nlm.nih.gov/geo/samples/GSM711nnn/GSM711557/suppl/GSM711557_16011454043242_1_1.txt.gz	ftp://ftp.ncbi.nlm.nih.gov/geo/samples/GSM711nnn/GSM711557/suppl/GSM711557_16011454043243_1_1.txt.gz	23698	64	C
GSM711558	colon carcinoma_MS95	GSM711558	Public on Apr 25 2011	Apr 19 2011	Apr 25 2011	RNA	2	pool of individual tumors	Homo sapiens	sample type: reference	total RNA	Total RNA was isolated from the adipose samples by Qiagen RNeasy spin columns with DNAse treatment. 2 纰実 of each sample was precipitated in ethanol and re-suspended in 14 纰宭 of water. Globin mitigation performed using Ambion's GLOBINclear kit (cat# AM1	Cy3	Custom automated version of the aminoallyl MessageAmp II kit from Ambion	9606	colon carcinoma_MS95	Homo sapiens	Stage: 1	overall survival (years): 2.67	overall survival censor (1-censored,0-non-censored): 0	metastasis (1-yes, 0-no): 0	time to metastasis (years): N/A	time to recurrence (years): 2.67	age at diagnosis: 82	tumor location: sigmoid	duke's stage: B	total RNA	Total RNA was isolated from the adipose samples by Qiagen RNeasy spin columns with DNAse treatment. 2 纰実 of each sample was precipitated in ethanol and re-suspended in 14 纰宭 of water. Globin mitigation performed using Ambion's GLOBINclear kit (cat# AM1	Cy5	Custom automated version of the aminoallyl MessageAmp II kit from Ambion	9606	Microarrays are incubated at 40鎺矯 for 48 hours in a rotating carousel. Hybridizations to custom Agilent microarrays are completed as previously described (Hughes et al.Nat Biotech (2001), 19(4):342-7). Microarrays are washed to remove non-specific hybrid	Microarrays are scanned using the Agilent LP2 laser scanner. The scanner output is a Tiff file, which contains the quantitative hybridization data from each individual microarray. The Tiff files are then processed using Rosetta custom feature extraction s	human colorectal tumor RNA	Data were processed using the Rosetta Resolver搴?system. Rosetta's custom feature extraction software performs error modeling before data are loaded into the Resolver system. The Resolver system performs a squeeze operation that combines replicates of the	GPL13425	Michael,,Nebozhyn	GpGx/Computational System biology	Merck, Inc	Mail Stop WP53B-120, 770 Sumneytown Pike, Building 53, P.O. Box 4	West Point	PA	19486	USA	ftp://ftp.ncbi.nlm.nih.gov/geo/samples/GSM711nnn/GSM711558/suppl/GSM711558_16011454043240_1_1.txt.gz	ftp://ftp.ncbi.nlm.nih.gov/geo/samples/GSM711nnn/GSM711558/suppl/GSM711558_16011454043241_1_1.txt.gz	23698	82	B
GSM711559	colon carcinoma_MS96	GSM711559	Public on Apr 25 2011	Apr 19 2011	Apr 25 2011	RNA	2	pool of individual tumors	Homo sapiens	sample type: reference	total RNA	Total RNA was isolated from the adipose samples by Qiagen RNeasy spin columns with DNAse treatment. 2 纰実 of each sample was precipitated in ethanol and re-suspended in 14 纰宭 of water. Globin mitigation performed using Ambion's GLOBINclear kit (cat# AM1	Cy3	Custom automated version of the aminoallyl MessageAmp II kit from Ambion	9606	colon carcinoma_MS96	Homo sapiens	Stage: 1	overall survival (years): 6.47	overall survival censor (1-censored,0-non-censored): 0	metastasis (1-yes, 0-no): 0	time to metastasis (years): N/A	time to recurrence (years): 6.47	age at diagnosis: 79	tumor location: rectum	duke's stage: B	total RNA	Total RNA was isolated from the adipose samples by Qiagen RNeasy spin columns with DNAse treatment. 2 纰実 of each sample was precipitated in ethanol and re-suspended in 14 纰宭 of water. Globin mitigation performed using Ambion's GLOBINclear kit (cat# AM1	Cy5	Custom automated version of the aminoallyl MessageAmp II kit from Ambion	9606	Microarrays are incubated at 40鎺矯 for 48 hours in a rotating carousel. Hybridizations to custom Agilent microarrays are completed as previously described (Hughes et al.Nat Biotech (2001), 19(4):342-7). Microarrays are washed to remove non-specific hybrid	Microarrays are scanned using the Agilent LP2 laser scanner. The scanner output is a Tiff file, which contains the quantitative hybridization data from each individual microarray. The Tiff files are then processed using Rosetta custom feature extraction s	human colorectal tumor RNA	Data were processed using the Rosetta Resolver搴?system. Rosetta's custom feature extraction software performs error modeling before data are loaded into the Resolver system. The Resolver system performs a squeeze operation that combines replicates of the	GPL13425	Michael,,Nebozhyn	GpGx/Computational System biology	Merck, Inc	Mail Stop WP53B-120, 770 Sumneytown Pike, Building 53, P.O. Box 4	West Point	PA	19486	USA	ftp://ftp.ncbi.nlm.nih.gov/geo/samples/GSM711nnn/GSM711559/suppl/GSM711559_16011454043238_1_1.txt.gz	ftp://ftp.ncbi.nlm.nih.gov/geo/samples/GSM711nnn/GSM711559/suppl/GSM711559_16011454043239_1_1.txt.gz	23698	79	B
GSM711560	colon carcinoma_MS97	GSM711560	Public on Apr 25 2011	Apr 19 2011	Apr 25 2011	RNA	2	pool of individual tumors	Homo sapiens	sample type: reference	total RNA	Total RNA was isolated from the adipose samples by Qiagen RNeasy spin columns with DNAse treatment. 2 纰実 of each sample was precipitated in ethanol and re-suspended in 14 纰宭 of water. Globin mitigation performed using Ambion's GLOBINclear kit (cat# AM1	Cy3	Custom automated version of the aminoallyl MessageAmp II kit from Ambion	9606	colon carcinoma_MS97	Homo sapiens	Stage: 1	overall survival (years): 5.90	overall survival censor (1-censored,0-non-censored): 0	metastasis (1-yes, 0-no): 0	time to metastasis (years): N/A	time to recurrence (years): 5.90	age at diagnosis: 67	tumor location: ascend	duke's stage: B	total RNA	Total RNA was isolated from the adipose samples by Qiagen RNeasy spin columns with DNAse treatment. 2 纰実 of each sample was precipitated in ethanol and re-suspended in 14 纰宭 of water. Globin mitigation performed using Ambion's GLOBINclear kit (cat# AM1	Cy5	Custom automated version of the aminoallyl MessageAmp II kit from Ambion	9606	Microarrays are incubated at 40鎺矯 for 48 hours in a rotating carousel. Hybridizations to custom Agilent microarrays are completed as previously described (Hughes et al.Nat Biotech (2001), 19(4):342-7). Microarrays are washed to remove non-specific hybrid	Microarrays are scanned using the Agilent LP2 laser scanner. The scanner output is a Tiff file, which contains the quantitative hybridization data from each individual microarray. The Tiff files are then processed using Rosetta custom feature extraction s	human colorectal tumor RNA	Data were processed using the Rosetta Resolver搴?system. Rosetta's custom feature extraction software performs error modeling before data are loaded into the Resolver system. The Resolver system performs a squeeze operation that combines replicates of the	GPL13425	Michael,,Nebozhyn	GpGx/Computational System biology	Merck, Inc	Mail Stop WP53B-120, 770 Sumneytown Pike, Building 53, P.O. Box 4	West Point	PA	19486	USA	ftp://ftp.ncbi.nlm.nih.gov/geo/samples/GSM711nnn/GSM711560/suppl/GSM711560_16011454043262_1_1.txt.gz	ftp://ftp.ncbi.nlm.nih.gov/geo/samples/GSM711nnn/GSM711560/suppl/GSM711560_16011454043263_1_1.txt.gz	23698	67	B
GSM711561	colon carcinoma_MS98	GSM711561	Public on Apr 25 2011	Apr 19 2011	Apr 25 2011	RNA	2	pool of individual tumors	Homo sapiens	sample type: reference	total RNA	Total RNA was isolated from the adipose samples by Qiagen RNeasy spin columns with DNAse treatment. 2 纰実 of each sample was precipitated in ethanol and re-suspended in 14 纰宭 of water. Globin mitigation performed using Ambion's GLOBINclear kit (cat# AM1	Cy3	Custom automated version of the aminoallyl MessageAmp II kit from Ambion	9606	colon carcinoma_MS98	Homo sapiens	Stage: 2	overall survival (years): 8.23	overall survival censor (1-censored,0-non-censored): 1	metastasis (1-yes, 0-no): 0	time to metastasis (years): N/A	time to recurrence (years): 8.23	age at diagnosis: 68	tumor location: ascend	duke's stage: B	total RNA	Total RNA was isolated from the adipose samples by Qiagen RNeasy spin columns with DNAse treatment. 2 纰実 of each sample was precipitated in ethanol and re-suspended in 14 纰宭 of water. Globin mitigation performed using Ambion's GLOBINclear kit (cat# AM1	Cy5	Custom automated version of the aminoallyl MessageAmp II kit from Ambion	9606	Microarrays are incubated at 40鎺矯 for 48 hours in a rotating carousel. Hybridizations to custom Agilent microarrays are completed as previously described (Hughes et al.Nat Biotech (2001), 19(4):342-7). Microarrays are washed to remove non-specific hybrid	Microarrays are scanned using the Agilent LP2 laser scanner. The scanner output is a Tiff file, which contains the quantitative hybridization data from each individual microarray. The Tiff files are then processed using Rosetta custom feature extraction s	human colorectal tumor RNA	Data were processed using the Rosetta Resolver搴?system. Rosetta's custom feature extraction software performs error modeling before data are loaded into the Resolver system. The Resolver system performs a squeeze operation that combines replicates of the	GPL13425	Michael,,Nebozhyn	GpGx/Computational System biology	Merck, Inc	Mail Stop WP53B-120, 770 Sumneytown Pike, Building 53, P.O. Box 4	West Point	PA	19486	USA	ftp://ftp.ncbi.nlm.nih.gov/geo/samples/GSM711nnn/GSM711561/suppl/GSM711561_16011454043260_1_1.txt.gz	ftp://ftp.ncbi.nlm.nih.gov/geo/samples/GSM711nnn/GSM711561/suppl/GSM711561_16011454043261_1_1.txt.gz	23698	68	B
GSM711562	colon carcinoma_MS99	GSM711562	Public on Apr 25 2011	Apr 19 2011	Apr 25 2011	RNA	2	pool of individual tumors	Homo sapiens	sample type: reference	total RNA	Total RNA was isolated from the adipose samples by Qiagen RNeasy spin columns with DNAse treatment. 2 纰実 of each sample was precipitated in ethanol and re-suspended in 14 纰宭 of water. Globin mitigation performed using Ambion's GLOBINclear kit (cat# AM1	Cy3	Custom automated version of the aminoallyl MessageAmp II kit from Ambion	9606	colon carcinoma_MS99	Homo sapiens	Stage: 2	overall survival (years): 8.92	overall survival censor (1-censored,0-non-censored): 1	metastasis (1-yes, 0-no): 0	time to metastasis (years): N/A	time to recurrence (years): 8.92	age at diagnosis: 56	tumor location: ascend	duke's stage: B	total RNA	Total RNA was isolated from the adipose samples by Qiagen RNeasy spin columns with DNAse treatment. 2 纰実 of each sample was precipitated in ethanol and re-suspended in 14 纰宭 of water. Globin mitigation performed using Ambion's GLOBINclear kit (cat# AM1	Cy5	Custom automated version of the aminoallyl MessageAmp II kit from Ambion	9606	Microarrays are incubated at 40鎺矯 for 48 hours in a rotating carousel. Hybridizations to custom Agilent microarrays are completed as previously described (Hughes et al.Nat Biotech (2001), 19(4):342-7). Microarrays are washed to remove non-specific hybrid	Microarrays are scanned using the Agilent LP2 laser scanner. The scanner output is a Tiff file, which contains the quantitative hybridization data from each individual microarray. The Tiff files are then processed using Rosetta custom feature extraction s	human colorectal tumor RNA	Data were processed using the Rosetta Resolver搴?system. Rosetta's custom feature extraction software performs error modeling before data are loaded into the Resolver system. The Resolver system performs a squeeze operation that combines replicates of the	GPL13425	Michael,,Nebozhyn	GpGx/Computational System biology	Merck, Inc	Mail Stop WP53B-120, 770 Sumneytown Pike, Building 53, P.O. Box 4	West Point	PA	19486	USA	ftp://ftp.ncbi.nlm.nih.gov/geo/samples/GSM711nnn/GSM711562/suppl/GSM711562_16011454043248_1_1.txt.gz	ftp://ftp.ncbi.nlm.nih.gov/geo/samples/GSM711nnn/GSM711562/suppl/GSM711562_16011454043249_1_1.txt.gz	23698	56	B
GSM711563	colon carcinoma_MS101	GSM711563	Public on Apr 25 2011	Apr 19 2011	Apr 25 2011	RNA	2	pool of individual tumors	Homo sapiens	sample type: reference	total RNA	Total RNA was isolated from the adipose samples by Qiagen RNeasy spin columns with DNAse treatment. 2 纰実 of each sample was precipitated in ethanol and re-suspended in 14 纰宭 of water. Globin mitigation performed using Ambion's GLOBINclear kit (cat# AM1	Cy3	Custom automated version of the aminoallyl MessageAmp II kit from Ambion	9606	colon carcinoma_MS101	Homo sapiens	Stage: 2	overall survival (years): 8.58	overall survival censor (1-censored,0-non-censored): 1	metastasis (1-yes, 0-no): 0	time to metastasis (years): N/A	time to recurrence (years): 4.29	age at diagnosis: 54	tumor location: transvers	duke's stage: B	total RNA	Total RNA was isolated from the adipose samples by Qiagen RNeasy spin columns with DNAse treatment. 2 纰実 of each sample was precipitated in ethanol and re-suspended in 14 纰宭 of water. Globin mitigation performed using Ambion's GLOBINclear kit (cat# AM1	Cy5	Custom automated version of the aminoallyl MessageAmp II kit from Ambion	9606	Microarrays are incubated at 40鎺矯 for 48 hours in a rotating carousel. Hybridizations to custom Agilent microarrays are completed as previously described (Hughes et al.Nat Biotech (2001), 19(4):342-7). Microarrays are washed to remove non-specific hybrid	Microarrays are scanned using the Agilent LP2 laser scanner. The scanner output is a Tiff file, which contains the quantitative hybridization data from each individual microarray. The Tiff files are then processed using Rosetta custom feature extraction s	human colorectal tumor RNA	Data were processed using the Rosetta Resolver搴?system. Rosetta's custom feature extraction software performs error modeling before data are loaded into the Resolver system. The Resolver system performs a squeeze operation that combines replicates of the	GPL13425	Michael,,Nebozhyn	GpGx/Computational System biology	Merck, Inc	Mail Stop WP53B-120, 770 Sumneytown Pike, Building 53, P.O. Box 4	West Point	PA	19486	USA	ftp://ftp.ncbi.nlm.nih.gov/geo/samples/GSM711nnn/GSM711563/suppl/GSM711563_16011454043246_1_1.txt.gz	ftp://ftp.ncbi.nlm.nih.gov/geo/samples/GSM711nnn/GSM711563/suppl/GSM711563_16011454043247_1_1.txt.gz	23698	54	B
GSM711564	colon carcinoma_MS102	GSM711564	Public on Apr 25 2011	Apr 19 2011	Apr 25 2011	RNA	2	pool of individual tumors	Homo sapiens	sample type: reference	total RNA	Total RNA was isolated from the adipose samples by Qiagen RNeasy spin columns with DNAse treatment. 2 纰実 of each sample was precipitated in ethanol and re-suspended in 14 纰宭 of water. Globin mitigation performed using Ambion's GLOBINclear kit (cat# AM1	Cy3	Custom automated version of the aminoallyl MessageAmp II kit from Ambion	9606	colon carcinoma_MS102	Homo sapiens	Stage: 2	overall survival (years): 8.64	overall survival censor (1-censored,0-non-censored): 1	metastasis (1-yes, 0-no): 0	time to metastasis (years): N/A	time to recurrence (years): 8.64	age at diagnosis: 70	tumor location: transvers	duke's stage: B	total RNA	Total RNA was isolated from the adipose samples by Qiagen RNeasy spin columns with DNAse treatment. 2 纰実 of each sample was precipitated in ethanol and re-suspended in 14 纰宭 of water. Globin mitigation performed using Ambion's GLOBINclear kit (cat# AM1	Cy5	Custom automated version of the aminoallyl MessageAmp II kit from Ambion	9606	Microarrays are incubated at 40鎺矯 for 48 hours in a rotating carousel. Hybridizations to custom Agilent microarrays are completed as previously described (Hughes et al.Nat Biotech (2001), 19(4):342-7). Microarrays are washed to remove non-specific hybrid	Microarrays are scanned using the Agilent LP2 laser scanner. The scanner output is a Tiff file, which contains the quantitative hybridization data from each individual microarray. The Tiff files are then processed using Rosetta custom feature extraction s	human colorectal tumor RNA	Data were processed using the Rosetta Resolver搴?system. Rosetta's custom feature extraction software performs error modeling before data are loaded into the Resolver system. The Resolver system performs a squeeze operation that combines replicates of the	GPL13425	Michael,,Nebozhyn	GpGx/Computational System biology	Merck, Inc	Mail Stop WP53B-120, 770 Sumneytown Pike, Building 53, P.O. Box 4	West Point	PA	19486	USA	ftp://ftp.ncbi.nlm.nih.gov/geo/samples/GSM711nnn/GSM711564/suppl/GSM711564_16011454043420_1_1.txt.gz	ftp://ftp.ncbi.nlm.nih.gov/geo/samples/GSM711nnn/GSM711564/suppl/GSM711564_16011454043421_1_1.txt.gz	23698	70	B
GSM711565	colon carcinoma_MS103	GSM711565	Public on Apr 25 2011	Apr 19 2011	Apr 25 2011	RNA	2	pool of individual tumors	Homo sapiens	sample type: reference	total RNA	Total RNA was isolated from the adipose samples by Qiagen RNeasy spin columns with DNAse treatment. 2 纰実 of each sample was precipitated in ethanol and re-suspended in 14 纰宭 of water. Globin mitigation performed using Ambion's GLOBINclear kit (cat# AM1	Cy3	Custom automated version of the aminoallyl MessageAmp II kit from Ambion	9606	colon carcinoma_MS103	Homo sapiens	Stage: 2	overall survival (years): 8.64	overall survival censor (1-censored,0-non-censored): 1	metastasis (1-yes, 0-no): 0	time to metastasis (years): N/A	time to recurrence (years): 8.64	age at diagnosis: 30	tumor location: transvers	duke's stage: B	total RNA	Total RNA was isolated from the adipose samples by Qiagen RNeasy spin columns with DNAse treatment. 2 纰実 of each sample was precipitated in ethanol and re-suspended in 14 纰宭 of water. Globin mitigation performed using Ambion's GLOBINclear kit (cat# AM1	Cy5	Custom automated version of the aminoallyl MessageAmp II kit from Ambion	9606	Microarrays are incubated at 40鎺矯 for 48 hours in a rotating carousel. Hybridizations to custom Agilent microarrays are completed as previously described (Hughes et al.Nat Biotech (2001), 19(4):342-7). Microarrays are washed to remove non-specific hybrid	Microarrays are scanned using the Agilent LP2 laser scanner. The scanner output is a Tiff file, which contains the quantitative hybridization data from each individual microarray. The Tiff files are then processed using Rosetta custom feature extraction s	human colorectal tumor RNA	Data were processed using the Rosetta Resolver搴?system. Rosetta's custom feature extraction software performs error modeling before data are loaded into the Resolver system. The Resolver system performs a squeeze operation that combines replicates of the	GPL13425	Michael,,Nebozhyn	GpGx/Computational System biology	Merck, Inc	Mail Stop WP53B-120, 770 Sumneytown Pike, Building 53, P.O. Box 4	West Point	PA	19486	USA	ftp://ftp.ncbi.nlm.nih.gov/geo/samples/GSM711nnn/GSM711565/suppl/GSM711565_16011454043268_1_1.txt.gz	ftp://ftp.ncbi.nlm.nih.gov/geo/samples/GSM711nnn/GSM711565/suppl/GSM711565_16011454043269_1_1.txt.gz	23698	30	B
GSM711566	colon carcinoma_MS104	GSM711566	Public on Apr 25 2011	Apr 19 2011	Apr 25 2011	RNA	2	pool of individual tumors	Homo sapiens	sample type: reference	total RNA	Total RNA was isolated from the adipose samples by Qiagen RNeasy spin columns with DNAse treatment. 2 纰実 of each sample was precipitated in ethanol and re-suspended in 14 纰宭 of water. Globin mitigation performed using Ambion's GLOBINclear kit (cat# AM1	Cy3	Custom automated version of the aminoallyl MessageAmp II kit from Ambion	9606	colon carcinoma_MS104	Homo sapiens	Stage: 2	overall survival (years): 5.73	overall survival censor (1-censored,0-non-censored): 0	metastasis (1-yes, 0-no): 0	time to metastasis (years): N/A	time to recurrence (years): 5.73	age at diagnosis: 65	tumor location: ascend	duke's stage: B	total RNA	Total RNA was isolated from the adipose samples by Qiagen RNeasy spin columns with DNAse treatment. 2 纰実 of each sample was precipitated in ethanol and re-suspended in 14 纰宭 of water. Globin mitigation performed using Ambion's GLOBINclear kit (cat# AM1	Cy5	Custom automated version of the aminoallyl MessageAmp II kit from Ambion	9606	Microarrays are incubated at 40鎺矯 for 48 hours in a rotating carousel. Hybridizations to custom Agilent microarrays are completed as previously described (Hughes et al.Nat Biotech (2001), 19(4):342-7). Microarrays are washed to remove non-specific hybrid	Microarrays are scanned using the Agilent LP2 laser scanner. The scanner output is a Tiff file, which contains the quantitative hybridization data from each individual microarray. The Tiff files are then processed using Rosetta custom feature extraction s	human colorectal tumor RNA	Data were processed using the Rosetta Resolver搴?system. Rosetta's custom feature extraction software performs error modeling before data are loaded into the Resolver system. The Resolver system performs a squeeze operation that combines replicates of the	GPL13425	Michael,,Nebozhyn	GpGx/Computational System biology	Merck, Inc	Mail Stop WP53B-120, 770 Sumneytown Pike, Building 53, P.O. Box 4	West Point	PA	19486	USA	ftp://ftp.ncbi.nlm.nih.gov/geo/samples/GSM711nnn/GSM711566/suppl/GSM711566_16011454043266_1_1.txt.gz	ftp://ftp.ncbi.nlm.nih.gov/geo/samples/GSM711nnn/GSM711566/suppl/GSM711566_16011454043267_1_1.txt.gz	23698	65	B
GSM711567	colon carcinoma_MS105	GSM711567	Public on Apr 25 2011	Apr 19 2011	Apr 25 2011	RNA	2	pool of individual tumors	Homo sapiens	sample type: reference	total RNA	Total RNA was isolated from the adipose samples by Qiagen RNeasy spin columns with DNAse treatment. 2 纰実 of each sample was precipitated in ethanol and re-suspended in 14 纰宭 of water. Globin mitigation performed using Ambion's GLOBINclear kit (cat# AM1	Cy3	Custom automated version of the aminoallyl MessageAmp II kit from Ambion	9606	colon carcinoma_MS105	Homo sapiens	Stage: 3	overall survival (years): 1.30	overall survival censor (1-censored,0-non-censored): 0	metastasis (1-yes, 0-no): 0	time to metastasis (years): N/A	time to recurrence (years): 1.29	age at diagnosis: 82	tumor location: coecum	duke's stage: C	total RNA	Total RNA was isolated from the adipose samples by Qiagen RNeasy spin columns with DNAse treatment. 2 纰実 of each sample was precipitated in ethanol and re-suspended in 14 纰宭 of water. Globin mitigation performed using Ambion's GLOBINclear kit (cat# AM1	Cy5	Custom automated version of the aminoallyl MessageAmp II kit from Ambion	9606	Microarrays are incubated at 40鎺矯 for 48 hours in a rotating carousel. Hybridizations to custom Agilent microarrays are completed as previously described (Hughes et al.Nat Biotech (2001), 19(4):342-7). Microarrays are washed to remove non-specific hybrid	Microarrays are scanned using the Agilent LP2 laser scanner. The scanner output is a Tiff file, which contains the quantitative hybridization data from each individual microarray. The Tiff files are then processed using Rosetta custom feature extraction s	human colorectal tumor RNA	Data were processed using the Rosetta Resolver搴?system. Rosetta's custom feature extraction software performs error modeling before data are loaded into the Resolver system. The Resolver system performs a squeeze operation that combines replicates of the	GPL13425	Michael,,Nebozhyn	GpGx/Computational System biology	Merck, Inc	Mail Stop WP53B-120, 770 Sumneytown Pike, Building 53, P.O. Box 4	West Point	PA	19486	USA	ftp://ftp.ncbi.nlm.nih.gov/geo/samples/GSM711nnn/GSM711567/suppl/GSM711567_16011454043264_1_1.txt.gz	ftp://ftp.ncbi.nlm.nih.gov/geo/samples/GSM711nnn/GSM711567/suppl/GSM711567_16011454043265_1_1.txt.gz	23698	82	C
GSM711568	colon carcinoma_MS106	GSM711568	Public on Apr 25 2011	Apr 19 2011	Apr 25 2011	RNA	2	pool of individual tumors	Homo sapiens	sample type: reference	total RNA	Total RNA was isolated from the adipose samples by Qiagen RNeasy spin columns with DNAse treatment. 2 纰実 of each sample was precipitated in ethanol and re-suspended in 14 纰宭 of water. Globin mitigation performed using Ambion's GLOBINclear kit (cat# AM1	Cy3	Custom automated version of the aminoallyl MessageAmp II kit from Ambion	9606	colon carcinoma_MS106	Homo sapiens	Stage: 2	overall survival (years): 8.13	overall survival censor (1-censored,0-non-censored): 1	metastasis (1-yes, 0-no): 0	time to metastasis (years): N/A	time to recurrence (years): 8.13	age at diagnosis: 65	tumor location: ascend	duke's stage: B	total RNA	Total RNA was isolated from the adipose samples by Qiagen RNeasy spin columns with DNAse treatment. 2 纰実 of each sample was precipitated in ethanol and re-suspended in 14 纰宭 of water. Globin mitigation performed using Ambion's GLOBINclear kit (cat# AM1	Cy5	Custom automated version of the aminoallyl MessageAmp II kit from Ambion	9606	Microarrays are incubated at 40鎺矯 for 48 hours in a rotating carousel. Hybridizations to custom Agilent microarrays are completed as previously described (Hughes et al.Nat Biotech (2001), 19(4):342-7). Microarrays are washed to remove non-specific hybrid	Microarrays are scanned using the Agilent LP2 laser scanner. The scanner output is a Tiff file, which contains the quantitative hybridization data from each individual microarray. The Tiff files are then processed using Rosetta custom feature extraction s	human colorectal tumor RNA	Data were processed using the Rosetta Resolver搴?system. Rosetta's custom feature extraction software performs error modeling before data are loaded into the Resolver system. The Resolver system performs a squeeze operation that combines replicates of the	GPL13425	Michael,,Nebozhyn	GpGx/Computational System biology	Merck, Inc	Mail Stop WP53B-120, 770 Sumneytown Pike, Building 53, P.O. Box 4	West Point	PA	19486	USA	ftp://ftp.ncbi.nlm.nih.gov/geo/samples/GSM711nnn/GSM711568/suppl/GSM711568_16011454043428_1_1.txt.gz	ftp://ftp.ncbi.nlm.nih.gov/geo/samples/GSM711nnn/GSM711568/suppl/GSM711568_16011454043429_1_1.txt.gz	23698	65	B
GSM711569	colon carcinoma_MS107	GSM711569	Public on Apr 25 2011	Apr 19 2011	Apr 25 2011	RNA	2	pool of individual tumors	Homo sapiens	sample type: reference	total RNA	Total RNA was isolated from the adipose samples by Qiagen RNeasy spin columns with DNAse treatment. 2 纰実 of each sample was precipitated in ethanol and re-suspended in 14 纰宭 of water. Globin mitigation performed using Ambion's GLOBINclear kit (cat# AM1	Cy3	Custom automated version of the aminoallyl MessageAmp II kit from Ambion	9606	colon carcinoma_MS107	Homo sapiens	Stage: 2	overall survival (years): 8.50	overall survival censor (1-censored,0-non-censored): 1	metastasis (1-yes, 0-no): 0	time to metastasis (years): N/A	time to recurrence (years): 8.50	age at diagnosis: 66	tumor location: sigmoid	duke's stage: B	total RNA	Total RNA was isolated from the adipose samples by Qiagen RNeasy spin columns with DNAse treatment. 2 纰実 of each sample was precipitated in ethanol and re-suspended in 14 纰宭 of water. Globin mitigation performed using Ambion's GLOBINclear kit (cat# AM1	Cy5	Custom automated version of the aminoallyl MessageAmp II kit from Ambion	9606	Microarrays are incubated at 40鎺矯 for 48 hours in a rotating carousel. Hybridizations to custom Agilent microarrays are completed as previously described (Hughes et al.Nat Biotech (2001), 19(4):342-7). Microarrays are washed to remove non-specific hybrid	Microarrays are scanned using the Agilent LP2 laser scanner. The scanner output is a Tiff file, which contains the quantitative hybridization data from each individual microarray. The Tiff files are then processed using Rosetta custom feature extraction s	human colorectal tumor RNA	Data were processed using the Rosetta Resolver搴?system. Rosetta's custom feature extraction software performs error modeling before data are loaded into the Resolver system. The Resolver system performs a squeeze operation that combines replicates of the	GPL13425	Michael,,Nebozhyn	GpGx/Computational System biology	Merck, Inc	Mail Stop WP53B-120, 770 Sumneytown Pike, Building 53, P.O. Box 4	West Point	PA	19486	USA	ftp://ftp.ncbi.nlm.nih.gov/geo/samples/GSM711nnn/GSM711569/suppl/GSM711569_16011454043426_1_1.txt.gz	ftp://ftp.ncbi.nlm.nih.gov/geo/samples/GSM711nnn/GSM711569/suppl/GSM711569_16011454043427_1_1.txt.gz	23698	66	B
GSM711570	colon carcinoma_MS108	GSM711570	Public on Apr 25 2011	Apr 19 2011	Apr 25 2011	RNA	2	pool of individual tumors	Homo sapiens	sample type: reference	total RNA	Total RNA was isolated from the adipose samples by Qiagen RNeasy spin columns with DNAse treatment. 2 纰実 of each sample was precipitated in ethanol and re-suspended in 14 纰宭 of water. Globin mitigation performed using Ambion's GLOBINclear kit (cat# AM1	Cy3	Custom automated version of the aminoallyl MessageAmp II kit from Ambion	9606	colon carcinoma_MS108	Homo sapiens	Stage: 1	overall survival (years): 8.01	overall survival censor (1-censored,0-non-censored): 1	metastasis (1-yes, 0-no): 0	time to metastasis (years): N/A	time to recurrence (years): 8.01	age at diagnosis: 65	tumor location: sigmoid	duke's stage: B	total RNA	Total RNA was isolated from the adipose samples by Qiagen RNeasy spin columns with DNAse treatment. 2 纰実 of each sample was precipitated in ethanol and re-suspended in 14 纰宭 of water. Globin mitigation performed using Ambion's GLOBINclear kit (cat# AM1	Cy5	Custom automated version of the aminoallyl MessageAmp II kit from Ambion	9606	Microarrays are incubated at 40鎺矯 for 48 hours in a rotating carousel. Hybridizations to custom Agilent microarrays are completed as previously described (Hughes et al.Nat Biotech (2001), 19(4):342-7). Microarrays are washed to remove non-specific hybrid	Microarrays are scanned using the Agilent LP2 laser scanner. The scanner output is a Tiff file, which contains the quantitative hybridization data from each individual microarray. The Tiff files are then processed using Rosetta custom feature extraction s	human colorectal tumor RNA	Data were processed using the Rosetta Resolver搴?system. Rosetta's custom feature extraction software performs error modeling before data are loaded into the Resolver system. The Resolver system performs a squeeze operation that combines replicates of the	GPL13425	Michael,,Nebozhyn	GpGx/Computational System biology	Merck, Inc	Mail Stop WP53B-120, 770 Sumneytown Pike, Building 53, P.O. Box 4	West Point	PA	19486	USA	ftp://ftp.ncbi.nlm.nih.gov/geo/samples/GSM711nnn/GSM711570/suppl/GSM711570_16011454043424_1_1.txt.gz	ftp://ftp.ncbi.nlm.nih.gov/geo/samples/GSM711nnn/GSM711570/suppl/GSM711570_16011454043425_1_1.txt.gz	23698	65	B
GSM711571	colon carcinoma_MS109	GSM711571	Public on Apr 25 2011	Apr 19 2011	Apr 25 2011	RNA	2	pool of individual tumors	Homo sapiens	sample type: reference	total RNA	Total RNA was isolated from the adipose samples by Qiagen RNeasy spin columns with DNAse treatment. 2 纰実 of each sample was precipitated in ethanol and re-suspended in 14 纰宭 of water. Globin mitigation performed using Ambion's GLOBINclear kit (cat# AM1	Cy3	Custom automated version of the aminoallyl MessageAmp II kit from Ambion	9606	colon carcinoma_MS109	Homo sapiens	Stage: 3	overall survival (years): 8.33	overall survival censor (1-censored,0-non-censored): 1	metastasis (1-yes, 0-no): 0	time to metastasis (years): N/A	time to recurrence (years): 8.33	age at diagnosis: 82	tumor location: coecum	duke's stage: C	total RNA	Total RNA was isolated from the adipose samples by Qiagen RNeasy spin columns with DNAse treatment. 2 纰実 of each sample was precipitated in ethanol and re-suspended in 14 纰宭 of water. Globin mitigation performed using Ambion's GLOBINclear kit (cat# AM1	Cy5	Custom automated version of the aminoallyl MessageAmp II kit from Ambion	9606	Microarrays are incubated at 40鎺矯 for 48 hours in a rotating carousel. Hybridizations to custom Agilent microarrays are completed as previously described (Hughes et al.Nat Biotech (2001), 19(4):342-7). Microarrays are washed to remove non-specific hybrid	Microarrays are scanned using the Agilent LP2 laser scanner. The scanner output is a Tiff file, which contains the quantitative hybridization data from each individual microarray. The Tiff files are then processed using Rosetta custom feature extraction s	human colorectal tumor RNA	Data were processed using the Rosetta Resolver搴?system. Rosetta's custom feature extraction software performs error modeling before data are loaded into the Resolver system. The Resolver system performs a squeeze operation that combines replicates of the	GPL13425	Michael,,Nebozhyn	GpGx/Computational System biology	Merck, Inc	Mail Stop WP53B-120, 770 Sumneytown Pike, Building 53, P.O. Box 4	West Point	PA	19486	USA	ftp://ftp.ncbi.nlm.nih.gov/geo/samples/GSM711nnn/GSM711571/suppl/GSM711571_16011454043422_1_1.txt.gz	ftp://ftp.ncbi.nlm.nih.gov/geo/samples/GSM711nnn/GSM711571/suppl/GSM711571_16011454043423_1_1.txt.gz	23698	82	C
GSM711572	colon carcinoma_MS110	GSM711572	Public on Apr 25 2011	Apr 19 2011	Apr 25 2011	RNA	2	pool of individual tumors	Homo sapiens	sample type: reference	total RNA	Total RNA was isolated from the adipose samples by Qiagen RNeasy spin columns with DNAse treatment. 2 纰実 of each sample was precipitated in ethanol and re-suspended in 14 纰宭 of water. Globin mitigation performed using Ambion's GLOBINclear kit (cat# AM1	Cy3	Custom automated version of the aminoallyl MessageAmp II kit from Ambion	9606	colon carcinoma_MS110	Homo sapiens	Stage: 2	overall survival (years): 8.25	overall survival censor (1-censored,0-non-censored): 1	metastasis (1-yes, 0-no): 0	time to metastasis (years): N/A	time to recurrence (years): 8.25	age at diagnosis: 77	tumor location: coecum	duke's stage: B	total RNA	Total RNA was isolated from the adipose samples by Qiagen RNeasy spin columns with DNAse treatment. 2 纰実 of each sample was precipitated in ethanol and re-suspended in 14 纰宭 of water. Globin mitigation performed using Ambion's GLOBINclear kit (cat# AM1	Cy5	Custom automated version of the aminoallyl MessageAmp II kit from Ambion	9606	Microarrays are incubated at 40鎺矯 for 48 hours in a rotating carousel. Hybridizations to custom Agilent microarrays are completed as previously described (Hughes et al.Nat Biotech (2001), 19(4):342-7). Microarrays are washed to remove non-specific hybrid	Microarrays are scanned using the Agilent LP2 laser scanner. The scanner output is a Tiff file, which contains the quantitative hybridization data from each individual microarray. The Tiff files are then processed using Rosetta custom feature extraction s	human colorectal tumor RNA	Data were processed using the Rosetta Resolver搴?system. Rosetta's custom feature extraction software performs error modeling before data are loaded into the Resolver system. The Resolver system performs a squeeze operation that combines replicates of the	GPL13425	Michael,,Nebozhyn	GpGx/Computational System biology	Merck, Inc	Mail Stop WP53B-120, 770 Sumneytown Pike, Building 53, P.O. Box 4	West Point	PA	19486	USA	ftp://ftp.ncbi.nlm.nih.gov/geo/samples/GSM711nnn/GSM711572/suppl/GSM711572_16011454043436_1_1.txt.gz	ftp://ftp.ncbi.nlm.nih.gov/geo/samples/GSM711nnn/GSM711572/suppl/GSM711572_16011454043437_1_1.txt.gz	23698	77	B
GSM711573	colon carcinoma_MS112	GSM711573	Public on Apr 25 2011	Apr 19 2011	Apr 25 2011	RNA	2	pool of individual tumors	Homo sapiens	sample type: reference	total RNA	Total RNA was isolated from the adipose samples by Qiagen RNeasy spin columns with DNAse treatment. 2 纰実 of each sample was precipitated in ethanol and re-suspended in 14 纰宭 of water. Globin mitigation performed using Ambion's GLOBINclear kit (cat# AM1	Cy3	Custom automated version of the aminoallyl MessageAmp II kit from Ambion	9606	colon carcinoma_MS112	Homo sapiens	Stage: 2	overall survival (years): 5.93	overall survival censor (1-censored,0-non-censored): 0	metastasis (1-yes, 0-no): 1	time to metastasis (years): 5.883641342	time to recurrence (years): 5.88	age at diagnosis: 82	tumor location: transvers	duke's stage: B	total RNA	Total RNA was isolated from the adipose samples by Qiagen RNeasy spin columns with DNAse treatment. 2 纰実 of each sample was precipitated in ethanol and re-suspended in 14 纰宭 of water. Globin mitigation performed using Ambion's GLOBINclear kit (cat# AM1	Cy5	Custom automated version of the aminoallyl MessageAmp II kit from Ambion	9606	Microarrays are incubated at 40鎺矯 for 48 hours in a rotating carousel. Hybridizations to custom Agilent microarrays are completed as previously described (Hughes et al.Nat Biotech (2001), 19(4):342-7). Microarrays are washed to remove non-specific hybrid	Microarrays are scanned using the Agilent LP2 laser scanner. The scanner output is a Tiff file, which contains the quantitative hybridization data from each individual microarray. The Tiff files are then processed using Rosetta custom feature extraction s	human colorectal tumor RNA	Data were processed using the Rosetta Resolver搴?system. Rosetta's custom feature extraction software performs error modeling before data are loaded into the Resolver system. The Resolver system performs a squeeze operation that combines replicates of the	GPL13425	Michael,,Nebozhyn	GpGx/Computational System biology	Merck, Inc	Mail Stop WP53B-120, 770 Sumneytown Pike, Building 53, P.O. Box 4	West Point	PA	19486	USA	ftp://ftp.ncbi.nlm.nih.gov/geo/samples/GSM711nnn/GSM711573/suppl/GSM711573_16011454043432_1_1.txt.gz	ftp://ftp.ncbi.nlm.nih.gov/geo/samples/GSM711nnn/GSM711573/suppl/GSM711573_16011454043433_1_1.txt.gz	23698	82	B
GSM711574	colon carcinoma_MS113	GSM711574	Public on Apr 25 2011	Apr 19 2011	Apr 25 2011	RNA	2	pool of individual tumors	Homo sapiens	sample type: reference	total RNA	Total RNA was isolated from the adipose samples by Qiagen RNeasy spin columns with DNAse treatment. 2 纰実 of each sample was precipitated in ethanol and re-suspended in 14 纰宭 of water. Globin mitigation performed using Ambion's GLOBINclear kit (cat# AM1	Cy3	Custom automated version of the aminoallyl MessageAmp II kit from Ambion	9606	colon carcinoma_MS113	Homo sapiens	Stage: 2	overall survival (years): 5.88	overall survival censor (1-censored,0-non-censored): 0	metastasis (1-yes, 0-no): 0	time to metastasis (years): N/A	time to recurrence (years): 5.88	age at diagnosis: 91	tumor location: coecum	duke's stage: B	total RNA	Total RNA was isolated from the adipose samples by Qiagen RNeasy spin columns with DNAse treatment. 2 纰実 of each sample was precipitated in ethanol and re-suspended in 14 纰宭 of water. Globin mitigation performed using Ambion's GLOBINclear kit (cat# AM1	Cy5	Custom automated version of the aminoallyl MessageAmp II kit from Ambion	9606	Microarrays are incubated at 40鎺矯 for 48 hours in a rotating carousel. Hybridizations to custom Agilent microarrays are completed as previously described (Hughes et al.Nat Biotech (2001), 19(4):342-7). Microarrays are washed to remove non-specific hybrid	Microarrays are scanned using the Agilent LP2 laser scanner. The scanner output is a Tiff file, which contains the quantitative hybridization data from each individual microarray. The Tiff files are then processed using Rosetta custom feature extraction s	human colorectal tumor RNA	Data were processed using the Rosetta Resolver搴?system. Rosetta's custom feature extraction software performs error modeling before data are loaded into the Resolver system. The Resolver system performs a squeeze operation that combines replicates of the	GPL13425	Michael,,Nebozhyn	GpGx/Computational System biology	Merck, Inc	Mail Stop WP53B-120, 770 Sumneytown Pike, Building 53, P.O. Box 4	West Point	PA	19486	USA	ftp://ftp.ncbi.nlm.nih.gov/geo/samples/GSM711nnn/GSM711574/suppl/GSM711574_16011454043430_1_1.txt.gz	ftp://ftp.ncbi.nlm.nih.gov/geo/samples/GSM711nnn/GSM711574/suppl/GSM711574_16011454043431_1_1.txt.gz	23698	91	B
GSM711575	colon carcinoma_MS114	GSM711575	Public on Apr 25 2011	Apr 19 2011	Apr 25 2011	RNA	2	pool of individual tumors	Homo sapiens	sample type: reference	total RNA	Total RNA was isolated from the adipose samples by Qiagen RNeasy spin columns with DNAse treatment. 2 纰実 of each sample was precipitated in ethanol and re-suspended in 14 纰宭 of water. Globin mitigation performed using Ambion's GLOBINclear kit (cat# AM1	Cy3	Custom automated version of the aminoallyl MessageAmp II kit from Ambion	9606	colon carcinoma_MS114	Homo sapiens	Stage: 2	overall survival (years): 7.74	overall survival censor (1-censored,0-non-censored): 1	metastasis (1-yes, 0-no): 0	time to metastasis (years): N/A	time to recurrence (years): 7.74	age at diagnosis: 53	tumor location: sigmoid	duke's stage: B	total RNA	Total RNA was isolated from the adipose samples by Qiagen RNeasy spin columns with DNAse treatment. 2 纰実 of each sample was precipitated in ethanol and re-suspended in 14 纰宭 of water. Globin mitigation performed using Ambion's GLOBINclear kit (cat# AM1	Cy5	Custom automated version of the aminoallyl MessageAmp II kit from Ambion	9606	Microarrays are incubated at 40鎺矯 for 48 hours in a rotating carousel. Hybridizations to custom Agilent microarrays are completed as previously described (Hughes et al.Nat Biotech (2001), 19(4):342-7). Microarrays are washed to remove non-specific hybrid	Microarrays are scanned using the Agilent LP2 laser scanner. The scanner output is a Tiff file, which contains the quantitative hybridization data from each individual microarray. The Tiff files are then processed using Rosetta custom feature extraction s	human colorectal tumor RNA	Data were processed using the Rosetta Resolver搴?system. Rosetta's custom feature extraction software performs error modeling before data are loaded into the Resolver system. The Resolver system performs a squeeze operation that combines replicates of the	GPL13425	Michael,,Nebozhyn	GpGx/Computational System biology	Merck, Inc	Mail Stop WP53B-120, 770 Sumneytown Pike, Building 53, P.O. Box 4	West Point	PA	19486	USA	ftp://ftp.ncbi.nlm.nih.gov/geo/samples/GSM711nnn/GSM711575/suppl/GSM711575_16011454043434_1_1.txt.gz	ftp://ftp.ncbi.nlm.nih.gov/geo/samples/GSM711nnn/GSM711575/suppl/GSM711575_16011454043435_1_1.txt.gz	23698	53	B
GSM711576	colon carcinoma_MS116	GSM711576	Public on Apr 25 2011	Apr 19 2011	Apr 25 2011	RNA	2	pool of individual tumors	Homo sapiens	sample type: reference	total RNA	Total RNA was isolated from the adipose samples by Qiagen RNeasy spin columns with DNAse treatment. 2 纰実 of each sample was precipitated in ethanol and re-suspended in 14 纰宭 of water. Globin mitigation performed using Ambion's GLOBINclear kit (cat# AM1	Cy3	Custom automated version of the aminoallyl MessageAmp II kit from Ambion	9606	colon carcinoma_MS116	Homo sapiens	Stage: 3	overall survival (years): 2.74	overall survival censor (1-censored,0-non-censored): 0	metastasis (1-yes, 0-no): 1	time to metastasis (years): 1.924709103	time to recurrence (years): 1.92	age at diagnosis: 39	tumor location: sigmoid	duke's stage: C	total RNA	Total RNA was isolated from the adipose samples by Qiagen RNeasy spin columns with DNAse treatment. 2 纰実 of each sample was precipitated in ethanol and re-suspended in 14 纰宭 of water. Globin mitigation performed using Ambion's GLOBINclear kit (cat# AM1	Cy5	Custom automated version of the aminoallyl MessageAmp II kit from Ambion	9606	Microarrays are incubated at 40鎺矯 for 48 hours in a rotating carousel. Hybridizations to custom Agilent microarrays are completed as previously described (Hughes et al.Nat Biotech (2001), 19(4):342-7). Microarrays are washed to remove non-specific hybrid	Microarrays are scanned using the Agilent LP2 laser scanner. The scanner output is a Tiff file, which contains the quantitative hybridization data from each individual microarray. The Tiff files are then processed using Rosetta custom feature extraction s	human colorectal tumor RNA	Data were processed using the Rosetta Resolver搴?system. Rosetta's custom feature extraction software performs error modeling before data are loaded into the Resolver system. The Resolver system performs a squeeze operation that combines replicates of the	GPL13425	Michael,,Nebozhyn	GpGx/Computational System biology	Merck, Inc	Mail Stop WP53B-120, 770 Sumneytown Pike, Building 53, P.O. Box 4	West Point	PA	19486	USA	ftp://ftp.ncbi.nlm.nih.gov/geo/samples/GSM711nnn/GSM711576/suppl/GSM711576_16011454042668_1_1.txt.gz	ftp://ftp.ncbi.nlm.nih.gov/geo/samples/GSM711nnn/GSM711576/suppl/GSM711576_16011454042669_1_1.txt.gz	23698	39	C
GSM711577	colon carcinoma_MS117	GSM711577	Public on Apr 25 2011	Apr 19 2011	Apr 25 2011	RNA	2	pool of individual tumors	Homo sapiens	sample type: reference	total RNA	Total RNA was isolated from the adipose samples by Qiagen RNeasy spin columns with DNAse treatment. 2 纰実 of each sample was precipitated in ethanol and re-suspended in 14 纰宭 of water. Globin mitigation performed using Ambion's GLOBINclear kit (cat# AM1	Cy3	Custom automated version of the aminoallyl MessageAmp II kit from Ambion	9606	colon carcinoma_MS117	Homo sapiens	Stage: 3	overall survival (years): 3.41	overall survival censor (1-censored,0-non-censored): 0	metastasis (1-yes, 0-no): 1	time to metastasis (years): 1.968514716	time to recurrence (years): 1.97	age at diagnosis: 53	tumor location: ascend	duke's stage: C	total RNA	Total RNA was isolated from the adipose samples by Qiagen RNeasy spin columns with DNAse treatment. 2 纰実 of each sample was precipitated in ethanol and re-suspended in 14 纰宭 of water. Globin mitigation performed using Ambion's GLOBINclear kit (cat# AM1	Cy5	Custom automated version of the aminoallyl MessageAmp II kit from Ambion	9606	Microarrays are incubated at 40鎺矯 for 48 hours in a rotating carousel. Hybridizations to custom Agilent microarrays are completed as previously described (Hughes et al.Nat Biotech (2001), 19(4):342-7). Microarrays are washed to remove non-specific hybrid	Microarrays are scanned using the Agilent LP2 laser scanner. The scanner output is a Tiff file, which contains the quantitative hybridization data from each individual microarray. The Tiff files are then processed using Rosetta custom feature extraction s	human colorectal tumor RNA	Data were processed using the Rosetta Resolver搴?system. Rosetta's custom feature extraction software performs error modeling before data are loaded into the Resolver system. The Resolver system performs a squeeze operation that combines replicates of the	GPL13425	Michael,,Nebozhyn	GpGx/Computational System biology	Merck, Inc	Mail Stop WP53B-120, 770 Sumneytown Pike, Building 53, P.O. Box 4	West Point	PA	19486	USA	ftp://ftp.ncbi.nlm.nih.gov/geo/samples/GSM711nnn/GSM711577/suppl/GSM711577_16011454042670_1_1.txt.gz	ftp://ftp.ncbi.nlm.nih.gov/geo/samples/GSM711nnn/GSM711577/suppl/GSM711577_16011454042671_1_1.txt.gz	23698	53	C
GSM711578	colon carcinoma_MS118	GSM711578	Public on Apr 25 2011	Apr 19 2011	Apr 25 2011	RNA	2	pool of individual tumors	Homo sapiens	sample type: reference	total RNA	Total RNA was isolated from the adipose samples by Qiagen RNeasy spin columns with DNAse treatment. 2 纰実 of each sample was precipitated in ethanol and re-suspended in 14 纰宭 of water. Globin mitigation performed using Ambion's GLOBINclear kit (cat# AM1	Cy3	Custom automated version of the aminoallyl MessageAmp II kit from Ambion	9606	colon carcinoma_MS118	Homo sapiens	Stage: 3	overall survival (years): 4.02	overall survival censor (1-censored,0-non-censored): 1	metastasis (1-yes, 0-no): 1	time to metastasis (years): 1.248459959	time to recurrence (years): 1.25	age at diagnosis: 70	tumor location: rectum	duke's stage: C	total RNA	Total RNA was isolated from the adipose samples by Qiagen RNeasy spin columns with DNAse treatment. 2 纰実 of each sample was precipitated in ethanol and re-suspended in 14 纰宭 of water. Globin mitigation performed using Ambion's GLOBINclear kit (cat# AM1	Cy5	Custom automated version of the aminoallyl MessageAmp II kit from Ambion	9606	Microarrays are incubated at 40鎺矯 for 48 hours in a rotating carousel. Hybridizations to custom Agilent microarrays are completed as previously described (Hughes et al.Nat Biotech (2001), 19(4):342-7). Microarrays are washed to remove non-specific hybrid	Microarrays are scanned using the Agilent LP2 laser scanner. The scanner output is a Tiff file, which contains the quantitative hybridization data from each individual microarray. The Tiff files are then processed using Rosetta custom feature extraction s	human colorectal tumor RNA	Data were processed using the Rosetta Resolver搴?system. Rosetta's custom feature extraction software performs error modeling before data are loaded into the Resolver system. The Resolver system performs a squeeze operation that combines replicates of the	GPL13425	Michael,,Nebozhyn	GpGx/Computational System biology	Merck, Inc	Mail Stop WP53B-120, 770 Sumneytown Pike, Building 53, P.O. Box 4	West Point	PA	19486	USA	ftp://ftp.ncbi.nlm.nih.gov/geo/samples/GSM711nnn/GSM711578/suppl/GSM711578_16011454042803_1_1.txt.gz	ftp://ftp.ncbi.nlm.nih.gov/geo/samples/GSM711nnn/GSM711578/suppl/GSM711578_16011454042804_1_1.txt.gz	23698	70	C
GSM711579	colon carcinoma_MS119	GSM711579	Public on Apr 25 2011	Apr 19 2011	Apr 25 2011	RNA	2	pool of individual tumors	Homo sapiens	sample type: reference	total RNA	Total RNA was isolated from the adipose samples by Qiagen RNeasy spin columns with DNAse treatment. 2 纰実 of each sample was precipitated in ethanol and re-suspended in 14 纰宭 of water. Globin mitigation performed using Ambion's GLOBINclear kit (cat# AM1	Cy3	Custom automated version of the aminoallyl MessageAmp II kit from Ambion	9606	colon carcinoma_MS119	Homo sapiens	Stage: 2	overall survival (years): 5.49	overall survival censor (1-censored,0-non-censored): 0	metastasis (1-yes, 0-no): 0	time to metastasis (years): N/A	time to recurrence (years): 5.49	age at diagnosis: 82	tumor location: coecum	duke's stage: B	total RNA	Total RNA was isolated from the adipose samples by Qiagen RNeasy spin columns with DNAse treatment. 2 纰実 of each sample was precipitated in ethanol and re-suspended in 14 纰宭 of water. Globin mitigation performed using Ambion's GLOBINclear kit (cat# AM1	Cy5	Custom automated version of the aminoallyl MessageAmp II kit from Ambion	9606	Microarrays are incubated at 40鎺矯 for 48 hours in a rotating carousel. Hybridizations to custom Agilent microarrays are completed as previously described (Hughes et al.Nat Biotech (2001), 19(4):342-7). Microarrays are washed to remove non-specific hybrid	Microarrays are scanned using the Agilent LP2 laser scanner. The scanner output is a Tiff file, which contains the quantitative hybridization data from each individual microarray. The Tiff files are then processed using Rosetta custom feature extraction s	human colorectal tumor RNA	Data were processed using the Rosetta Resolver搴?system. Rosetta's custom feature extraction software performs error modeling before data are loaded into the Resolver system. The Resolver system performs a squeeze operation that combines replicates of the	GPL13425	Michael,,Nebozhyn	GpGx/Computational System biology	Merck, Inc	Mail Stop WP53B-120, 770 Sumneytown Pike, Building 53, P.O. Box 4	West Point	PA	19486	USA	ftp://ftp.ncbi.nlm.nih.gov/geo/samples/GSM711nnn/GSM711579/suppl/GSM711579_16011454042672_1_2.txt.gz	ftp://ftp.ncbi.nlm.nih.gov/geo/samples/GSM711nnn/GSM711579/suppl/GSM711579_16011454043150_1_1.txt.gz	23698	82	B
GSM711580	colon carcinoma_MS120	GSM711580	Public on Apr 25 2011	Apr 19 2011	Apr 25 2011	RNA	2	pool of individual tumors	Homo sapiens	sample type: reference	total RNA	Total RNA was isolated from the adipose samples by Qiagen RNeasy spin columns with DNAse treatment. 2 纰実 of each sample was precipitated in ethanol and re-suspended in 14 纰宭 of water. Globin mitigation performed using Ambion's GLOBINclear kit (cat# AM1	Cy3	Custom automated version of the aminoallyl MessageAmp II kit from Ambion	9606	colon carcinoma_MS120	Homo sapiens	Stage: 1	overall survival (years): 7.11	overall survival censor (1-censored,0-non-censored): 1	metastasis (1-yes, 0-no): 0	time to metastasis (years): N/A	time to recurrence (years): 7.11	age at diagnosis: 64	tumor location: rectum	duke's stage: A	total RNA	Total RNA was isolated from the adipose samples by Qiagen RNeasy spin columns with DNAse treatment. 2 纰実 of each sample was precipitated in ethanol and re-suspended in 14 纰宭 of water. Globin mitigation performed using Ambion's GLOBINclear kit (cat# AM1	Cy5	Custom automated version of the aminoallyl MessageAmp II kit from Ambion	9606	Microarrays are incubated at 40鎺矯 for 48 hours in a rotating carousel. Hybridizations to custom Agilent microarrays are completed as previously described (Hughes et al.Nat Biotech (2001), 19(4):342-7). Microarrays are washed to remove non-specific hybrid	Microarrays are scanned using the Agilent LP2 laser scanner. The scanner output is a Tiff file, which contains the quantitative hybridization data from each individual microarray. The Tiff files are then processed using Rosetta custom feature extraction s	human colorectal tumor RNA	Data were processed using the Rosetta Resolver搴?system. Rosetta's custom feature extraction software performs error modeling before data are loaded into the Resolver system. The Resolver system performs a squeeze operation that combines replicates of the	GPL13425	Michael,,Nebozhyn	GpGx/Computational System biology	Merck, Inc	Mail Stop WP53B-120, 770 Sumneytown Pike, Building 53, P.O. Box 4	West Point	PA	19486	USA	ftp://ftp.ncbi.nlm.nih.gov/geo/samples/GSM711nnn/GSM711580/suppl/GSM711580_16011454043454_1_1.txt.gz	ftp://ftp.ncbi.nlm.nih.gov/geo/samples/GSM711nnn/GSM711580/suppl/GSM711580_16011454043456_1_1.txt.gz	23698	64	A
GSM711581	colon carcinoma_MS122	GSM711581	Public on Apr 25 2011	Apr 19 2011	Apr 25 2011	RNA	2	pool of individual tumors	Homo sapiens	sample type: reference	total RNA	Total RNA was isolated from the adipose samples by Qiagen RNeasy spin columns with DNAse treatment. 2 纰実 of each sample was precipitated in ethanol and re-suspended in 14 纰宭 of water. Globin mitigation performed using Ambion's GLOBINclear kit (cat# AM1	Cy3	Custom automated version of the aminoallyl MessageAmp II kit from Ambion	9606	colon carcinoma_MS122	Homo sapiens	Stage: 2	overall survival (years): 1.60	overall survival censor (1-censored,0-non-censored): 0	metastasis (1-yes, 0-no): 0	time to metastasis (years): N/A	time to recurrence (years): 1.60	age at diagnosis: 80	tumor location: coecum	duke's stage: B	total RNA	Total RNA was isolated from the adipose samples by Qiagen RNeasy spin columns with DNAse treatment. 2 纰実 of each sample was precipitated in ethanol and re-suspended in 14 纰宭 of water. Globin mitigation performed using Ambion's GLOBINclear kit (cat# AM1	Cy5	Custom automated version of the aminoallyl MessageAmp II kit from Ambion	9606	Microarrays are incubated at 40鎺矯 for 48 hours in a rotating carousel. Hybridizations to custom Agilent microarrays are completed as previously described (Hughes et al.Nat Biotech (2001), 19(4):342-7). Microarrays are washed to remove non-specific hybrid	Microarrays are scanned using the Agilent LP2 laser scanner. The scanner output is a Tiff file, which contains the quantitative hybridization data from each individual microarray. The Tiff files are then processed using Rosetta custom feature extraction s	human colorectal tumor RNA	Data were processed using the Rosetta Resolver搴?system. Rosetta's custom feature extraction software performs error modeling before data are loaded into the Resolver system. The Resolver system performs a squeeze operation that combines replicates of the	GPL13425	Michael,,Nebozhyn	GpGx/Computational System biology	Merck, Inc	Mail Stop WP53B-120, 770 Sumneytown Pike, Building 53, P.O. Box 4	West Point	PA	19486	USA	ftp://ftp.ncbi.nlm.nih.gov/geo/samples/GSM711nnn/GSM711581/suppl/GSM711581_16011454042781_1_1.txt.gz	ftp://ftp.ncbi.nlm.nih.gov/geo/samples/GSM711nnn/GSM711581/suppl/GSM711581_16011454042782_1_1.txt.gz	23698	80	B
GSM711582	colon carcinoma_MS123	GSM711582	Public on Apr 25 2011	Apr 19 2011	Apr 25 2011	RNA	2	pool of individual tumors	Homo sapiens	sample type: reference	total RNA	Total RNA was isolated from the adipose samples by Qiagen RNeasy spin columns with DNAse treatment. 2 纰実 of each sample was precipitated in ethanol and re-suspended in 14 纰宭 of water. Globin mitigation performed using Ambion's GLOBINclear kit (cat# AM1	Cy3	Custom automated version of the aminoallyl MessageAmp II kit from Ambion	9606	colon carcinoma_MS123	Homo sapiens	Stage: 2	overall survival (years): 6.69	overall survival censor (1-censored,0-non-censored): 1	metastasis (1-yes, 0-no): 0	time to metastasis (years): N/A	time to recurrence (years): 0.50	age at diagnosis: 48	tumor location: ascend	duke's stage: B	total RNA	Total RNA was isolated from the adipose samples by Qiagen RNeasy spin columns with DNAse treatment. 2 纰実 of each sample was precipitated in ethanol and re-suspended in 14 纰宭 of water. Globin mitigation performed using Ambion's GLOBINclear kit (cat# AM1	Cy5	Custom automated version of the aminoallyl MessageAmp II kit from Ambion	9606	Microarrays are incubated at 40鎺矯 for 48 hours in a rotating carousel. Hybridizations to custom Agilent microarrays are completed as previously described (Hughes et al.Nat Biotech (2001), 19(4):342-7). Microarrays are washed to remove non-specific hybrid	Microarrays are scanned using the Agilent LP2 laser scanner. The scanner output is a Tiff file, which contains the quantitative hybridization data from each individual microarray. The Tiff files are then processed using Rosetta custom feature extraction s	human colorectal tumor RNA	Data were processed using the Rosetta Resolver搴?system. Rosetta's custom feature extraction software performs error modeling before data are loaded into the Resolver system. The Resolver system performs a squeeze operation that combines replicates of the	GPL13425	Michael,,Nebozhyn	GpGx/Computational System biology	Merck, Inc	Mail Stop WP53B-120, 770 Sumneytown Pike, Building 53, P.O. Box 4	West Point	PA	19486	USA	ftp://ftp.ncbi.nlm.nih.gov/geo/samples/GSM711nnn/GSM711582/suppl/GSM711582_16011454043452_1_1.txt.gz	ftp://ftp.ncbi.nlm.nih.gov/geo/samples/GSM711nnn/GSM711582/suppl/GSM711582_16011454043453_1_1.txt.gz	23698	48	B
GSM711583	colon carcinoma_MS124	GSM711583	Public on Apr 25 2011	Apr 19 2011	Apr 25 2011	RNA	2	pool of individual tumors	Homo sapiens	sample type: reference	total RNA	Total RNA was isolated from the adipose samples by Qiagen RNeasy spin columns with DNAse treatment. 2 纰実 of each sample was precipitated in ethanol and re-suspended in 14 纰宭 of water. Globin mitigation performed using Ambion's GLOBINclear kit (cat# AM1	Cy3	Custom automated version of the aminoallyl MessageAmp II kit from Ambion	9606	colon carcinoma_MS124	Homo sapiens	Stage: 1	overall survival (years): 5.64	overall survival censor (1-censored,0-non-censored): 0	metastasis (1-yes, 0-no): 0	time to metastasis (years): N/A	time to recurrence (years): 5.64	age at diagnosis: 69	tumor location: ascend	duke's stage: A	total RNA	Total RNA was isolated from the adipose samples by Qiagen RNeasy spin columns with DNAse treatment. 2 纰実 of each sample was precipitated in ethanol and re-suspended in 14 纰宭 of water. Globin mitigation performed using Ambion's GLOBINclear kit (cat# AM1	Cy5	Custom automated version of the aminoallyl MessageAmp II kit from Ambion	9606	Microarrays are incubated at 40鎺矯 for 48 hours in a rotating carousel. Hybridizations to custom Agilent microarrays are completed as previously described (Hughes et al.Nat Biotech (2001), 19(4):342-7). Microarrays are washed to remove non-specific hybrid	Microarrays are scanned using the Agilent LP2 laser scanner. The scanner output is a Tiff file, which contains the quantitative hybridization data from each individual microarray. The Tiff files are then processed using Rosetta custom feature extraction s	human colorectal tumor RNA	Data were processed using the Rosetta Resolver搴?system. Rosetta's custom feature extraction software performs error modeling before data are loaded into the Resolver system. The Resolver system performs a squeeze operation that combines replicates of the	GPL13425	Michael,,Nebozhyn	GpGx/Computational System biology	Merck, Inc	Mail Stop WP53B-120, 770 Sumneytown Pike, Building 53, P.O. Box 4	West Point	PA	19486	USA	ftp://ftp.ncbi.nlm.nih.gov/geo/samples/GSM711nnn/GSM711583/suppl/GSM711583_16011454043450_1_1.txt.gz	ftp://ftp.ncbi.nlm.nih.gov/geo/samples/GSM711nnn/GSM711583/suppl/GSM711583_16011454043451_1_1.txt.gz	23698	69	A
GSM711584	colon carcinoma_MS126	GSM711584	Public on Apr 25 2011	Apr 19 2011	Apr 25 2011	RNA	2	pool of individual tumors	Homo sapiens	sample type: reference	total RNA	Total RNA was isolated from the adipose samples by Qiagen RNeasy spin columns with DNAse treatment. 2 纰実 of each sample was precipitated in ethanol and re-suspended in 14 纰宭 of water. Globin mitigation performed using Ambion's GLOBINclear kit (cat# AM1	Cy3	Custom automated version of the aminoallyl MessageAmp II kit from Ambion	9606	colon carcinoma_MS126	Homo sapiens	Stage: 1	overall survival (years): 3.74	overall survival censor (1-censored,0-non-censored): 0	metastasis (1-yes, 0-no): 0	time to metastasis (years): N/A	time to recurrence (years): 3.74	age at diagnosis: 57	tumor location: sigmoid	duke's stage: A	total RNA	Total RNA was isolated from the adipose samples by Qiagen RNeasy spin columns with DNAse treatment. 2 纰実 of each sample was precipitated in ethanol and re-suspended in 14 纰宭 of water. Globin mitigation performed using Ambion's GLOBINclear kit (cat# AM1	Cy5	Custom automated version of the aminoallyl MessageAmp II kit from Ambion	9606	Microarrays are incubated at 40鎺矯 for 48 hours in a rotating carousel. Hybridizations to custom Agilent microarrays are completed as previously described (Hughes et al.Nat Biotech (2001), 19(4):342-7). Microarrays are washed to remove non-specific hybrid	Microarrays are scanned using the Agilent LP2 laser scanner. The scanner output is a Tiff file, which contains the quantitative hybridization data from each individual microarray. The Tiff files are then processed using Rosetta custom feature extraction s	human colorectal tumor RNA	Data were processed using the Rosetta Resolver搴?system. Rosetta's custom feature extraction software performs error modeling before data are loaded into the Resolver system. The Resolver system performs a squeeze operation that combines replicates of the	GPL13425	Michael,,Nebozhyn	GpGx/Computational System biology	Merck, Inc	Mail Stop WP53B-120, 770 Sumneytown Pike, Building 53, P.O. Box 4	West Point	PA	19486	USA	ftp://ftp.ncbi.nlm.nih.gov/geo/samples/GSM711nnn/GSM711584/suppl/GSM711584_16011454043185_1_1.txt.gz	ftp://ftp.ncbi.nlm.nih.gov/geo/samples/GSM711nnn/GSM711584/suppl/GSM711584_16011454043186_1_1.txt.gz	23698	57	A
GSM711585	colon carcinoma_MS127	GSM711585	Public on Apr 25 2011	Apr 19 2011	Apr 25 2011	RNA	2	pool of individual tumors	Homo sapiens	sample type: reference	total RNA	Total RNA was isolated from the adipose samples by Qiagen RNeasy spin columns with DNAse treatment. 2 纰実 of each sample was precipitated in ethanol and re-suspended in 14 纰宭 of water. Globin mitigation performed using Ambion's GLOBINclear kit (cat# AM1	Cy3	Custom automated version of the aminoallyl MessageAmp II kit from Ambion	9606	colon carcinoma_MS127	Homo sapiens	Stage: 3	overall survival (years): 0.16	overall survival censor (1-censored,0-non-censored): 0	metastasis (1-yes, 0-no): 0	time to metastasis (years): N/A	time to recurrence (years): 0.16	age at diagnosis: 89	tumor location: transvers	duke's stage: C	total RNA	Total RNA was isolated from the adipose samples by Qiagen RNeasy spin columns with DNAse treatment. 2 纰実 of each sample was precipitated in ethanol and re-suspended in 14 纰宭 of water. Globin mitigation performed using Ambion's GLOBINclear kit (cat# AM1	Cy5	Custom automated version of the aminoallyl MessageAmp II kit from Ambion	9606	Microarrays are incubated at 40鎺矯 for 48 hours in a rotating carousel. Hybridizations to custom Agilent microarrays are completed as previously described (Hughes et al.Nat Biotech (2001), 19(4):342-7). Microarrays are washed to remove non-specific hybrid	Microarrays are scanned using the Agilent LP2 laser scanner. The scanner output is a Tiff file, which contains the quantitative hybridization data from each individual microarray. The Tiff files are then processed using Rosetta custom feature extraction s	human colorectal tumor RNA	Data were processed using the Rosetta Resolver搴?system. Rosetta's custom feature extraction software performs error modeling before data are loaded into the Resolver system. The Resolver system performs a squeeze operation that combines replicates of the	GPL13425	Michael,,Nebozhyn	GpGx/Computational System biology	Merck, Inc	Mail Stop WP53B-120, 770 Sumneytown Pike, Building 53, P.O. Box 4	West Point	PA	19486	USA	ftp://ftp.ncbi.nlm.nih.gov/geo/samples/GSM711nnn/GSM711585/suppl/GSM711585_16011454043438_1_1.txt.gz	ftp://ftp.ncbi.nlm.nih.gov/geo/samples/GSM711nnn/GSM711585/suppl/GSM711585_16011454043439_1_1.txt.gz	23698	89	C
GSM711586	colon carcinoma_MS128	GSM711586	Public on Apr 25 2011	Apr 19 2011	Apr 25 2011	RNA	2	pool of individual tumors	Homo sapiens	sample type: reference	total RNA	Total RNA was isolated from the adipose samples by Qiagen RNeasy spin columns with DNAse treatment. 2 纰実 of each sample was precipitated in ethanol and re-suspended in 14 纰宭 of water. Globin mitigation performed using Ambion's GLOBINclear kit (cat# AM1	Cy3	Custom automated version of the aminoallyl MessageAmp II kit from Ambion	9606	colon carcinoma_MS128	Homo sapiens	Stage: 2	overall survival (years): 6.11	overall survival censor (1-censored,0-non-censored): 1	metastasis (1-yes, 0-no): 0	time to metastasis (years): N/A	time to recurrence (years): 6.11	age at diagnosis: 56	tumor location: ascend	duke's stage: B	total RNA	Total RNA was isolated from the adipose samples by Qiagen RNeasy spin columns with DNAse treatment. 2 纰実 of each sample was precipitated in ethanol and re-suspended in 14 纰宭 of water. Globin mitigation performed using Ambion's GLOBINclear kit (cat# AM1	Cy5	Custom automated version of the aminoallyl MessageAmp II kit from Ambion	9606	Microarrays are incubated at 40鎺矯 for 48 hours in a rotating carousel. Hybridizations to custom Agilent microarrays are completed as previously described (Hughes et al.Nat Biotech (2001), 19(4):342-7). Microarrays are washed to remove non-specific hybrid	Microarrays are scanned using the Agilent LP2 laser scanner. The scanner output is a Tiff file, which contains the quantitative hybridization data from each individual microarray. The Tiff files are then processed using Rosetta custom feature extraction s	human colorectal tumor RNA	Data were processed using the Rosetta Resolver搴?system. Rosetta's custom feature extraction software performs error modeling before data are loaded into the Resolver system. The Resolver system performs a squeeze operation that combines replicates of the	GPL13425	Michael,,Nebozhyn	GpGx/Computational System biology	Merck, Inc	Mail Stop WP53B-120, 770 Sumneytown Pike, Building 53, P.O. Box 4	West Point	PA	19486	USA	ftp://ftp.ncbi.nlm.nih.gov/geo/samples/GSM711nnn/GSM711586/suppl/GSM711586_16011454043151_1_2.txt.gz	ftp://ftp.ncbi.nlm.nih.gov/geo/samples/GSM711nnn/GSM711586/suppl/GSM711586_16011454043152_1_1.txt.gz	23698	56	B
GSM711587	colon carcinoma_MS129	GSM711587	Public on Apr 25 2011	Apr 19 2011	Apr 25 2011	RNA	2	pool of individual tumors	Homo sapiens	sample type: reference	total RNA	Total RNA was isolated from the adipose samples by Qiagen RNeasy spin columns with DNAse treatment. 2 纰実 of each sample was precipitated in ethanol and re-suspended in 14 纰宭 of water. Globin mitigation performed using Ambion's GLOBINclear kit (cat# AM1	Cy3	Custom automated version of the aminoallyl MessageAmp II kit from Ambion	9606	colon carcinoma_MS129	Homo sapiens	Stage: 3	overall survival (years): 5.87	overall survival censor (1-censored,0-non-censored): 1	metastasis (1-yes, 0-no): 0	time to metastasis (years): N/A	time to recurrence (years): 5.87	age at diagnosis: 79	tumor location: ascend	duke's stage: C	total RNA	Total RNA was isolated from the adipose samples by Qiagen RNeasy spin columns with DNAse treatment. 2 纰実 of each sample was precipitated in ethanol and re-suspended in 14 纰宭 of water. Globin mitigation performed using Ambion's GLOBINclear kit (cat# AM1	Cy5	Custom automated version of the aminoallyl MessageAmp II kit from Ambion	9606	Microarrays are incubated at 40鎺矯 for 48 hours in a rotating carousel. Hybridizations to custom Agilent microarrays are completed as previously described (Hughes et al.Nat Biotech (2001), 19(4):342-7). Microarrays are washed to remove non-specific hybrid	Microarrays are scanned using the Agilent LP2 laser scanner. The scanner output is a Tiff file, which contains the quantitative hybridization data from each individual microarray. The Tiff files are then processed using Rosetta custom feature extraction s	human colorectal tumor RNA	Data were processed using the Rosetta Resolver搴?system. Rosetta's custom feature extraction software performs error modeling before data are loaded into the Resolver system. The Resolver system performs a squeeze operation that combines replicates of the	GPL13425	Michael,,Nebozhyn	GpGx/Computational System biology	Merck, Inc	Mail Stop WP53B-120, 770 Sumneytown Pike, Building 53, P.O. Box 4	West Point	PA	19486	USA	ftp://ftp.ncbi.nlm.nih.gov/geo/samples/GSM711nnn/GSM711587/suppl/GSM711587_16011454042664_1_1.txt.gz	ftp://ftp.ncbi.nlm.nih.gov/geo/samples/GSM711nnn/GSM711587/suppl/GSM711587_16011454042665_1_1.txt.gz	23698	79	C
GSM711588	colon carcinoma_MS131	GSM711588	Public on Apr 25 2011	Apr 19 2011	Apr 25 2011	RNA	2	pool of individual tumors	Homo sapiens	sample type: reference	total RNA	Total RNA was isolated from the adipose samples by Qiagen RNeasy spin columns with DNAse treatment. 2 纰実 of each sample was precipitated in ethanol and re-suspended in 14 纰宭 of water. Globin mitigation performed using Ambion's GLOBINclear kit (cat# AM1	Cy3	Custom automated version of the aminoallyl MessageAmp II kit from Ambion	9606	colon carcinoma_MS131	Homo sapiens	Stage: 1	overall survival (years): 5.14	overall survival censor (1-censored,0-non-censored): 1	metastasis (1-yes, 0-no): 0	time to metastasis (years): N/A	time to recurrence (years): 5.14	age at diagnosis: 61	tumor location: coecum	duke's stage: B	total RNA	Total RNA was isolated from the adipose samples by Qiagen RNeasy spin columns with DNAse treatment. 2 纰実 of each sample was precipitated in ethanol and re-suspended in 14 纰宭 of water. Globin mitigation performed using Ambion's GLOBINclear kit (cat# AM1	Cy5	Custom automated version of the aminoallyl MessageAmp II kit from Ambion	9606	Microarrays are incubated at 40鎺矯 for 48 hours in a rotating carousel. Hybridizations to custom Agilent microarrays are completed as previously described (Hughes et al.Nat Biotech (2001), 19(4):342-7). Microarrays are washed to remove non-specific hybrid	Microarrays are scanned using the Agilent LP2 laser scanner. The scanner output is a Tiff file, which contains the quantitative hybridization data from each individual microarray. The Tiff files are then processed using Rosetta custom feature extraction s	human colorectal tumor RNA	Data were processed using the Rosetta Resolver搴?system. Rosetta's custom feature extraction software performs error modeling before data are loaded into the Resolver system. The Resolver system performs a squeeze operation that combines replicates of the	GPL13425	Michael,,Nebozhyn	GpGx/Computational System biology	Merck, Inc	Mail Stop WP53B-120, 770 Sumneytown Pike, Building 53, P.O. Box 4	West Point	PA	19486	USA	ftp://ftp.ncbi.nlm.nih.gov/geo/samples/GSM711nnn/GSM711588/suppl/GSM711588_16011454043181_1_1.txt.gz	ftp://ftp.ncbi.nlm.nih.gov/geo/samples/GSM711nnn/GSM711588/suppl/GSM711588_16011454043182_1_1.txt.gz	23698	61	B
[truncated: 19 more rows]
[truncated: 8 more columns]

## Sheet: GSE17538
	title	geo_accession	status	submission_date	last_update_date	type	channel_count	source_name_ch1	organism_ch1	characteristics_ch1	characteristics_ch1.1	characteristics_ch1.2	characteristics_ch1.3	characteristics_ch1.4	characteristics_ch1.5	characteristics_ch1.6	characteristics_ch1.7	characteristics_ch1.8	characteristics_ch1.9	characteristics_ch1.10	molecule_ch1	extract_protocol_ch1	label_ch1	label_protocol_ch1	taxid_ch1	hyb_protocol	scan_protocol	description	data_processing	platform_id	contact_name	contact_email	contact_institute	contact_address	contact_city	contact_state	contact_zip/postal_code	contact_country	supplementary_file	data_row_count	relation	relation.1	relation.2	adenoma type:ch1	age:ch1	ajcc_stage:ch1	dfs_event (disease free survival; cancer recurrence):ch1	dfs_time:ch1	dss_event (disease specific survival; death from cancer):ch1
[truncated: 238 more rows]
[truncated: 7 more columns]

[truncated: 1 more sheets: GSE166555]
