# Supplementary material for: Establishment of a Necroptosis Related Genes Signature to Predict Prognosis and Therapeutic Response in Colon Cancer
Source: Front Cell Dev Biol. 2022 Jul 8;10:921320. doi: 10.3389/fcell.2022.921320 (PMC9305485; doi:10.3389/fcell.2022.921320)
Supplement: Supplementary file 6 [file Table7.xlsx]

## Sheet: necroptosis related genes
RIPK3
MLKL
TNF
TNFRSF1A
TRADD
TRAF2
TRAF5
RIPK1
BIRC2
BIRC3
XIAP
RBCK1
RNF31
SHARPIN
SPATA2L
SPATA2
CYLD
FADD
CASP8
CFLAR
CYBB
CAMK2A
CAMK2D
CAMK2B
CAMK2G
SLC25A4
SLC25A5
SLC25A6
SLC25A31
PPID
VDAC1
VDAC2
VDAC3
GLUD2
GLUD1
GLUL
PYGL
PYGM
PYGB
MAPK8
MAPK10
MAPK9
FTH1
FTL
PLA2G4E
PLA2G4A
JMJD7-PLA2G4B
PLA2G4B
PLA2G4C
PLA2G4D
PLA2G4F
ALOX15
CAPN1
CAPN2
SMPD1
PGAM5
DNM1L
NLRP3
PYCARD
CASP1
IL1B
CHMP2A
CHMP2B
CHMP3
RNF103-CHMP3
CHMP4B
CHMP4A
CHMP4C
CHMP6
VPS4B
VPS4A
CHMP1B
CHMP1A
CHMP5
CHMP7
TRPM7
IL1A
IL33
HMGB1
TNFSF10
TNFRSF10A
TNFRSF10B
FASLG
FAS
FAF1
IFNA1
IFNA2
IFNA4
IFNA5
IFNA6
IFNA7
IFNA8
IFNA10
IFNA13
IFNA14
IFNA16
IFNA17
IFNA21
IFNB1
IFNG
IFNAR1
IFNAR2
IFNGR1
IFNGR2
JAK1
JAK2
JAK3
TYK2
STAT1
STAT2
STAT3
STAT4
STAT5A
STAT5B
STAT6
IRF9
EIF2AK2
TLR4
TICAM2
TICAM1
TLR3
ZBP1
USP21
SQSTM1
HSP90AA1
HSP90AB1
TNFAIP3
PARP1
BID
BAX
AIFM1
H2AX
H2AC20
H2AC12
H2AC1
H2AW
H2AB3
H2AC8
H2AC4
MACROH2A2
MACROH2A1
H2AC19
H2AJ
H2AB1
H2AC17
H2AC18
H2AC11
H2AC21
H2AZ2
H2AC7
H2AZ1
H2AC15
H2AC6
H2AC13
H2AC14
H2AC16
H2AB2
PPIA
BCL2

## Sheet: immunotherapy related genes
PDCD1
CTLA4
CD274
LAG3
TIGIT
CD276
ICOS
ICOSLG
CD27
CD70
TNFRSF18
CD47
IDO1
KLRD1
KLRC1
KIR2DL1
KIR3DL1

## Sheet: cell marker genes
T cells	PTPRC
	CD30
	CD3E
	CD4
	CD8A
	FOXP3
	KLRD1
B cells	CD19
	CD79A
	MS4A1
plasma cells	IGHG1
	MZB1
	SDC1
DC cells	CD68
	CD163
	CD14
	CD86
	CCL22
	S100A4
macrophages	CD68
	CD163
	MRC1
	MSR1
	S100A8
fibroblasts	FGF7
	MME
	COL1A1
	ACTA2
	PECAM1
	VWF
	PROX1
epithelia	EPCAM
	KRT19
	KRT7
	KRT8
	KRT18
	PROM1
